# Supplementary material for: Transcriptomics analysis reveals the effect of Broussonetia papyrifera L. fermented feed on meat quality traits in fattening lamb
Source: PeerJ. 2021 Apr 27;9:e11295. doi: 10.7717/peerj.11295 (PMC8086582; doi:10.7717/peerj.11295)
Supplement: Supplemental Information 1 [file peerj-09-11295-s001.xlsx]

## Sheet: Sheet1
Gene	Accession No.	Primer Sequences (5′–3′)	Product Length (bp)
FABP3	NM_001267884.2	F: TCTTTCCCGACCTAGCCCAG	260
		R: TCATCTGCCGTGGTCTCATC
ECI1	XM_004020717.4	F: TCATCCTAACTTCCGCCTGC	196
		R: GGTGTAGTGAGCTGGGTTCC
ACADVL	XM_004012636.3	F: AAACGACATTCTCCGGCTGT	83
		R: TTAGAGCATTGCCAAGCCCA
GOT1	XM_004020100.4	F: TAGGAGGTGTGCAGTGCTTG	151
		R: GCGGCAATAAAGACACCATT
LPIN1	NM_001280700.1	F: GCCTCAAGCCACAAAGTCCT	193
		R: TCTCTGTCTGCGGCTTGTTC
MLYCD	XM_004015497.4	F: GTCCGGGAAATGAATGGGGT	155
		R: CCATCCAGGTTTTCACGGG
PLIN5	XM_027969150.1	F: CCTTCAGAGACGGTGGTGAC	184
		R: CCTCAGTCATGGGCAGGAAG
RASD1	NM_001161872.1	F: ATCAGATGTTCCACGCGCTC	221
		R: GCGGATGTACATGAGGTCG
SELENOW	XM_027978546.1	F: TGCGCAGAGGACTCTTTTGA	71
		R: CTTACCCCAAGCTCCCTGTG
GAPDH	NM_001009784.1	F: CTTCCAGCCTTCCTTCCTGG	180
		R: GCCAGGGCAGTGATCTCTTT
