# Supplementary material for: Transcriptomics analysis reveals the effect of Broussonetia papyrifera L. fermented feed on meat quality traits in fattening lamb
Source: PeerJ. 2021 Apr 27;9:e11295. doi: 10.7717/peerj.11295 (PMC8086582; doi:10.7717/peerj.11295)
Supplement: Supplemental Information 2 [file peerj-09-11295-s002.xlsx]

## Sheet: saturated fatty acid
	C4：0	C10：0	C12：0	C13：0	C14：0	C15：0	C16：0	C17：0	C18：0	C20:0	C21:0	C22:0	C23:0
0	0.841	0.212	0.097	0.322	2.664	0.621	25.433	1.509	16.493	0.096	0.703	0.212	1.348
0	1.311	0.214	0.102	0.342	2.658	0.614	25.403	1.542	16.451	0.092	0.687	0.214	1.35
0	0.845	0.213	0.097	0.324	2.677	0.625	25.561	1.517	16.576	0.097	0.706	0.213	1.354
0	2.057	0.157	0.135	0.472	2.359	0.285	24.155	0.974	13.678		0.408	0.389	2.407
0	2.782	0.161	0.138	0.491	2.361	0.28	23.949	0.969	13.581		0.414	0.407	2.375
0	2.054	0.157	0.135	0.471	2.355	0.285	24.119	0.972	13.658		0.408	0.388	2.403
0	2.354			0.707	1.841	0.217	23.155	0.947	15.782		0.278	0.371	3.466
0	3.02			0.724	1.873	0.199	23.027	0.928	15.594		0.271	0.368	3.423
0	2.35			0.706	1.838	0.382	23.111	0.945	15.752		0.278	0.37	3.459
0.06	2.257	0.154		0.693	2.483	0.444	24.437	1.017	15.785		0.381	0.375	3.378
0.06	2.843	0.152	0.146	0.656	2.462	0.372	24.192	1.003	15.649		0.359	0.41	3.367
0.06	2.26	0.154		0.694	2.487	0.341	24.469	1.018	15.806		0.382	0.376	3.383
0.06	1.393	0.165	0.125	0.424	2.314	0.384	24.694	1.138	17.817	0.101	0.357	0.233	1.872
0.06	1.982	0.162	0.13	0.41	2.323	0.42	24.554	1.093	17.655	0.116	0.348	0.235	1.85
0.06	1.391	0.165	0.125	0.424	2.311	0.384	24.668	1.137	17.799	0.101	0.357	0.233	1.87
0.06	3.837			0.936	2.009	0.562	22.284	0.895	12.713		0.289	0.513	4.548
0.06	5.226			0.924	2.027	0.778	22.421	0.8	12.611		0.278	0.502	0.384
0.06	3.896			0.95	2.04	0.571	22.623	0.909	12.907		0.293	0.52	4.618
0.18	2.019	0.135		0.622	1.923	0.238	25.1	0.829	14.169		0.245		2.517
0.18	3.088	0.147		0.602	1.943	0.284	24.79	0.805	14.035		0.259		2.473
0.18	2.017	0.135		0.621	1.92	0.367	25.07	0.828	14.152		0.245		2.514
0.18	2.639			0.701	2.097	0.255	23.348	0.905	13.615		0.366		3.389
0.18	3.989			0.657	2.114	0.231	23.062	0.841	13.463		0.336		3.383
0.18	3.976			0.655	2.107	0.537	22.984	0.838	13.417		0.335		3.372
0.18	1.47	0.153	0.108	0.359	2.397	0.263	24.424	0.988	20.148	0.133	0.324	0.19	1.543
0.18	1.743	0.146	0.112	0.366	2.378	0.254	24.407	0.974	20.15	0.132	0.313	0.186	1.508
0.18	1.47	0.153	0.108	0.359	2.396	0.263	24.414	0.987	20.14	0.133	0.324	0.19	1.542
0.18	1.255	0.156	0.365	0.33	4.202	0.71	25.657	1.463	16.422	0.145	0.45	0.16	1.416
1	1.641	0.163	0.371	0.332	4.176	0.717	25.587	1.458	16.369	0.151	0.43	0.168	1.402
1	1.075	0.189	0.36	0.534	4.014	0.671	24.723	1.364	15.667	0.151	0.411	0.085	1.358
1	1.477	0.153	0.145	0.475	2.748	0.557	25.192	1.399	18.555	0.197	0.366	0.19	2.155
1	2.571	0.158	0.149	0.463	2.638	0.551	24.891	1.376	18.315	0.197	0.361	0.203	2.116
1	2.576	0.158	0.15	0.464	2.643	0.552	24.942	1.379	18.353	0.198	0.362	0.203	2.121
1	5.418			1.17	2.052	0.519	20.809	1.302	14.097		0.564		5.23
1	7.008			1.122	2.066	0.524	20.503	1.276	13.816		0.579		5.165
1	6.974			1.117	2.056	1.059	20.404	1.27	13.749		0.576		5.141

## Sheet: unsaturated fatty acid 
Y1	C14：1	C15：1	C16：1	C17：1	C18：1n9t	C18:1n9c	C20:1	C24:1	C18:2n6t	C18:2n6c	C18:3n6	C18:3n3	C20:2	C20:3n6	C22:6n3
0	0.102	0.079	1.504	0.484	4.139	36.518		0.199	0.254	4.938	0.063	0.321	0.244	0.114	0.134
0	0.104	0.08	1.553	0.479	4.104	36.358		0.194	0.25	4.89	0.068	0.32	0.096	0.113	0.117
0	0.102	0.079	1.008	0.483	4.16	36.702		0.2	0.255	4.962	0.073	0.323	0.245	0.114	0.135
0	0.125	0.308	1.736	0.556	2.441	41.163		0.25	0.21	5.03		0.266		0.186	0.17
0	0.133	0.322	1.701	0.587	2.429	40.746		0.216	0.207	4.993		0.259		0.193	0.24
0	0.266	0.308	1.734	0.585	2.437	41.102		0.25	0.216	5.023		0.266		0.186	0.169
0	0.411	0.393	1.269	0.457	2.341	37.48		0.39	0.166	7.085		0.304		0.245	0.269
0	0.468	0.443	1.276	0.456	2.343	37.243		0.368	0.173	7.019		0.301		0.239	0.163
0	0.41	0.393	1.266	0.457	2.337	37.409		0.389	0.19	7.072		0.303		0.245	0.268
0.06	0.206	0.498	1.525	0.541	2.758	33.66		0.295	0.188	6.942		0.409		0.258	0.173
0.06	0.196	0.503	1.499	0.534	2.713	33.581		0.315	0.183	6.814		0.397		0.243	0.238
0.06	0.206	0.499	1.527	0.542	2.761	33.705		0.295	0.158	6.933		0.41		0.258	0.173
0.06	0.196	0.362	1.216	0.525	3.014	37.518		0.21	0.179	8.14	0.278			0.141	0.346
0.06	0.17	0.377	1.201	0.507	3.031	37.338		0.199	0.178	7.954	0.27			0.127	0.221
0.06	0.298	0.361	1.215	0.525	3.011	37.479		0.21	0.179	7.927	0.277			0.141	0.221
0.06	0.478	0.427	1.839	0.607	1.784	35.156		0.421		3.849		0.381		0.262	0.186
0.06	0.512	0.477	1.785	0.588	1.75	35.267		0.424		3.838		0.399		0.259	0.164
0.06	0.485	0.433	1.867	0.617	1.811	35.691		0.303		3.847		0.387		0.266	0.186
0.18	0.375	0.324	1.567	0.746	2.224	38.727		0.241	0.179	3.822		0.471	0.252	0.242	0.315
0.18	0.392	0.342	1.513	0.756	2.202	38.293		0.22	0.157	3.727		0.464	0.252	0.209	0.298
0.18	0.375	0.324	1.565	0.749	2.221	38.68		0.24	0.173	3.694		0.47	0.252	0.242	0.315
0.18	0.37	0.355	1.651	0.637	2.345	37.229		0.27	0.209	5.911	0.271	0.606	0.34	0.267	0.183
0.18	0.371	0.355	1.628	0.653	2.251	36.711		0.264	0.2	5.822	0.287	0.579	0.367	0.257	0.167
0.18	0.37	0.354	1.622	0.636	2.234	36.586		0.263	0.233	5.834	0.27	0.577		0.256	0.183
0.18	0.139	0.296	1.167	0.529	2.483	38.175	0.087	0.174	0.174	9.367		0.287		0.113	0.352
0.18	0.137	0.296	1.174	0.536	2.47	38.086	0.087	0.154	0.159	9.201		0.283		0.116
0.18	0.139	0.296	1.166	0.528	2.482	38.16	0.088	0.174	0.213	9.156		0.286		0.113	0.357
0.18	0.169	0.352	1.814	0.708	1.976	35.795	0.096	0.137	0.257	7.944		1.388		0.091	0.39
1	0.17	0.348	1.793	0.722	1.96	35.659	0.095	0.123	0.248	7.929		1.379		0.096	0.371
1	0.208	0.246	1.706	3.485	2.093	34.098		0.141	0.076	7.955		1.337		0.089	0.193
1	0.204	0.395	1.3	0.596	2.554	31.809		0.212	0.275	5.161		2.108		0.146	0.492
1	0.318	0.391	1.272	0.622	2.525	31.339	0.094	0.206	0.338	5.155		2.062		0.15	0.49
1	0.186	0.392	1.275	0.623	2.531	31.403	0.094	0.207	0.265	5.156		2.066		0.15	0.491
1	0.591	0.52	1.373	0.703	1.724	28.166		0.351		8.329	0.331	3.59	0.316		1.16
1	0.591	0.55	1.344	0.65	1.712	27.612		0.368		8.291	0.349	3.475	0.326		1.132
1	0.588	0.548	1.337	0.647	1.703	27.479		0.31		8.456	0.298	3.459	0.324		1.126
