# Supplementary material for: Transcriptomics analysis reveals the effect of Broussonetia papyrifera L. fermented feed on meat quality traits in fattening lamb
Source: PeerJ. 2021 Apr 27;9:e11295. doi: 10.7717/peerj.11295 (PMC8086582; doi:10.7717/peerj.11295)
Supplement: Supplemental Information 3 [file peerj-09-11295-s003.xlsx]

## Sheet: Muscle fiber's area
0	0.06	0.18	1
575.73	609.057	661.797	418.06
265.996	646.103	787.74	468.932
481.762	627.918	690.516	483.683
460.374	537.687	773.381	333.363
385.391	454.911	532.651	495.587
562.171	629.235	650.712	383.007
477.954	537.883	623.149	425.658
563.025	499.644	502.794	515.036
470.765	600.214	634.324	521.762
297.011	526.993	530.552	298.648
493.932	332.189	543.381	267.135
376.085	462.206	764.751	436.993
436.779	468.95	578.897	427.865
375.836	537.883	632.918	435.445
375.836	504.164	681.157	343.754
363.256	566.601	561.708	344.982
462.811	516.904	633.95	698.31
379.929	472.313	687.189	573.808
488.47	493.025	797.295	502.189
356.05	454.235	559.733	632.616
341.673	462.456	728.434	343.986
355.605	567.936	922.847	570.196
353.772	578.345	602.936	471.085
428.986	487.794	683.167	544.573
447.135	392.669	522.26	457.633
328.114	469.786	583.879	605.961
471.762	552.171	872.562	371.815
449.751	540.569	482.544	506.263
436.726	502.295	887.722	396.53
435.801	631.014	568.47	466.904
551.868	601.317	664.075	365.391
658.79	610.089	659.911	212.189
537.954	589.751	800.071	299.11
458.594	470.979	706.032	234.466
528.879	471.103	748.577	362.776
355.836	540.178	616.21	236.69
388.594	576.477	753.915	333.381
385.053	614.395	311.459	266.673
409.591	566.281	647.954	218.737
453.025	593.665	667.295	169.217
445.427	504.039	613.381	494.164
435.623	428.843	553.185	280.445
331.619	423.132	416.975	231.868
327.74	568.754	671.174	397.989
465.302	433.861	581.423	655.48
410.071	470.979	584.733	216.708
596.619	492.847	468.523	319.199
333.274	675.801	567.064	225
620.071	525.125	622.491	189.146
491.762	575.018	697.954	204.68
414.359	478.167	676.833	174.039
296.192	739.929	625.605	307.722
414.057	475.552	745.765	281.655
491.174	737.438	940.872	241.904
559.715	536.975	533.381	257.972
453.221	567.046	667.313	192.954
619.982	509.288	393.577	166.068
417.135	743.577	720.605	391.673
430.018	541.851	734.448	326.993
465.712	723.256	1039.91	326.459
438.31	620.142	511.868	218.452
487.544	486.085	798.826	261.851
512.1	668.95	457.153	440.819
644.804	477.082	860.534	431.246
562.811	584.039	644.306	478.167
522.687	562.171	456.032	455.765
434.715	537.491	603.149	270.89
388.79	542.651	887.331	422.224
424.751	530.694	496.726	520.747
417.58	449.395	731.406	449.253
610.498	551.922	841.05	469.591
354.199	466.317	427.367	469.84
602.171	511.352	688.221	531.103
650.285	470.907	483.612	462.242
635.445	469.804	656.246	429.128
387.278	481.157	574.644	495.249
590.641	482.349	611.263	238.683
638.007	466.406	548.114	464.591
538.452	474.769	1238.04	334.039
569.448	574.377	850	424.573
540.071	627.011	568.096	119.342
516.673	645.214	924.911	264.217
580.569	476.335	762.9	351.068
416.815	470.854	736.548	372.153
481.655	579.822	705.925	321.548
435.996	534.057	625.534	194.858
609.306	332.278	987.58	161.37
512.687	506.886	644.288	235.445
435.89	655.694	840.196	408.968
606.032	427.58	655.356	210.409
625.427	690.872	545.445	251.53
485.516	413.274	1024.84	261.174
569.626	589.786	609.68	494.715
554.395	565.73	737.42	388.719
542.438	626.014	850.783	349.911
439.288	514.164	789.769	301.744
413.381	489.075	623.327	367.865
482.171	484.448	986.085	388.505
462.456	455.107	865.996	354.591
462.456	505.587	722.954	381.601
436.744	510.712	722.954	381.601

## Sheet: Muscle fiber diameter
0	0.06	0.18	1
16.065	21.509	23.96	13.546
20.405	19.422	25.647	14.796
20.405	25.514	24.984	17.478
20.405	17.211	23.529	18.055
19.71	23.628	25.083	12.445
17.045	20.956	24.873	15.693
21.624	16.708	21.243	14.926
21.108	19.127	18.732	14.207
18.989	20.082	16.712	14.926
21.303	18.375	16.703	19.238
23.745	15.209	21.954	15.51
16.949	16.536	21.598	18.426
21.145	23.829	20.405	15.26
21.263	22.283	23.334	17.016
17.24	19.09	18.865	12.284
20.318	16.206	17.936	13.588
19.767	16.206	19.334	20.461
18.399	17.555	24.138	21.132
23.628	15.693	23.996	15.887
20.929	18.637	26.37	17.797
14.714	19.925	23.334	19.275
21.621	23.682	17.128	20.837
18.019	24.466	25.309	20.751
14.564	21.726	25.789	14.734
21.558	15.524	26.207	21.159
19.8	23.246	24.111	20
19.753	25.298	25.659	15.487
12.655	20.283	25.772	17.421
16.678	19.695	21.091	16.982
19.753	15.063	23.745	16.982
21.429	21.476	25.324	16.982
19.422	19.157	25.659	17.392
11.096	21.726	18.614	18.173
16.346	23.892	23.027	19.634
11.751	21.373	23.19	16.224
20.167	21.303	23.166	15.864
10.025	15.51	25.309	16.605
17.045	17.31	21.359	15.487
16.398	19.695	17.936	17.36
12.828	17.893	24.34	16.639
20.72	16.029	25.222	18.126
21.453	21.476	25.913	14.337
20.45	15.869	24.105	15.958
16.566	23.634	25.041	15.846
21.108	21.873	26.478	16.065
16.381	24.067	26.37	18.36
19.422	19.59	24.255	16.437
12.828	20.053	24.938	16.669
26.51	20.283	23.628	19.677
19.742	21.359	21.772	16.708
17.936	19.539	26.362	15.761
19.579	20.135	23.7	17.684
19.271	23.456	24.27	17.555
17.539	21.873	15.837	18.732
17.162	21.027	22.891	18.898
15.186	24.197	25.824	17.372
14.559	19.105	26.142	16.669
25.989	21.413	25.38	14.835
14.515	22.273	23.246	15.26
12.655	26.305	24.067	19.227
16.873	17.502	21.413	16.978
11.811	20.349	22.603	16.263
18.959	21.532	22.603	14.734
16.48	23.092	23.166	17.733
21.037	16.746	22.578	15.851
21.558	19.59	22.912	17.36
11.931	18.019	21.974	17.733
24.637	18.503	24.984	14.734
26.356	15.756	27.353	14.719
23.126	16.346	27.115	15.167
21.091	22.238	21.974	16.263
18.778	15.186	20.05	13.842
22.435	18.082	21.873	11.847
23.19	20.05	23.901	13.666
18.736	16.81	22.206	15.864
21.108	19.911	23.273	14.734
17.392	19.271	25.714	14.006
22.442	15.288	26.381	15.111
22.641	16.472	23.984	14.337
21.108	19.341	25.298	13.211
21.162	17.409	23.892	15.634
20.527	19.212	23.862	13.666
26.638	20.405	22.145	13.713
30.112	24.697	23.981	11.751
23.793	22.912	24.567	13.965
23.634	20.419	25.086	14.758
26.727	15.724	22.426	18.522
22.109	17.893	22.346	14.382
23.7	19.925	23.757	12.542
13.603	18.286	21.509	15.111
19.695	22.35	20.888	17.749
23.086	14.695	20.534	14.357
16.065	14.758	19.4	13.603
16.289	24.255	18.857	12.079
23.532	20.534	22.603	15.487
23.064	22.804	24.62	13.339
20.423	20.461	23.064	13.666
23.166	24.244	22.912	17.928
13.032	24.244	22.206	15.487
22.337	19.695	22.09	13.211
