# Supplementary material for: Transcriptomics analysis reveals the effect of Broussonetia papyrifera L. fermented feed on meat quality traits in fattening lamb
Source: PeerJ. 2021 Apr 27;9:e11295. doi: 10.7717/peerj.11295 (PMC8086582; doi:10.7717/peerj.11295)
Supplement: Supplemental Information 4 [file peerj-09-11295-s004.xlsx]

## Sheet: Sheet1
#ID	CK1	CK2	CK3	G181	G182	G21	G22	G23	G61	G62	G63	CK1_CK2_CK3_vs_G181_G182_DESeq2_FDR	CK1_CK2_CK3_vs_G181_G182_DESeq2_log2FC	CK1_CK2_CK3_vs_G181_G182_DESeq2_(FDR_0.05_FC_1.5)_regulated	CK1_CK2_CK3_vs_G21_G22_G23_DESeq2_FDR	CK1_CK2_CK3_vs_G21_G22_G23_DESeq2_log2FC	CK1_CK2_CK3_vs_G21_G22_G23_DESeq2_(FDR_0.05_FC_1.5)_regulated	CK1_CK2_CK3_vs_G61_G62_G63_DESeq2_FDR	CK1_CK2_CK3_vs_G61_G62_G63_DESeq2_log2FC	CK1_CK2_CK3_vs_G61_G62_G63_DESeq2_(FDR_0.05_FC_1.5)_regulated	COG_class	COG_class_annotation	GO_annotation	KEGG_annotation	KEGG_pathway_annotation	KOG_class	KOG_class_annotation	Pfam_annotation	Swiss_Prot_annotation	eggNOG_class	eggNOG_class_annotation	NR_annotation	GO_second_level_annotation
Ovis_aries_newGene_11470	0.662711	0.668439	0.551132	0.740188	0.936403	2.09592	2.83058	1.24301	1.45507	0.766423	0.623549	0.876774	0.151169	normal	8.23e-06	1.31482	up	0.741972	0.21105	normal	--	--	Molecular Function: SNARE binding (GO:0000149);; Molecular Function: SNAP receptor activity (GO:0005484);; Cellular Component: microtubule organizing center (GO:0005815);; Cellular Component: cilium (GO:0005929);; Biological Process: exocytosis (GO:0006887);; Biological Process: ER to Golgi vesicle-mediated transport (GO:0006888);; Cellular Component: SNARE complex (GO:0031201);; Cellular Compone…	--	--	--	--	--	--	--	--	PREDICTED: uncharacterized protein LOC106991855 [Ovis aries]	molecular function: binding (GO:0005488);; cellular component: cell (GO:0005623);; cellular component: organelle (GO:0043226);; cellular component: organelle part (GO:0044422);; cellular component: cell part (GO:0044464);; biological process: cellular process (GO:0009987);; biological process: single-organism process (GO:0044699);; biological process: localization (GO:0051179);; cellular componen…
Ovis_aries_newGene_13526	0.160378	0.271356	0.333234	0.295091	0.626938	1.05241	0.961575	0.604459	0.535359	0.388171	0.188198	--	--	--	0.0146363	0.9806	up	--	--	--	--	--	--	--	--	--	--	--	--	--	--	PREDICTED: uncharacterized protein LOC105616740 [Ovis aries]	--
Ovis_aries_newGene_15106	1.1577	2.324	1.07938	3.7028	4.25038	1.41263	1.81119	2.26546	3.30841	1.0769	0.852669	0.0246809	0.912984	up	0.738849	0.254001	normal	0.927076	0.0881459	normal	--	--	--	--	--	--	--	--	LINE-1 reverse transcriptase homolog OS=Nycticebus coucang OX=9470 PE=3 SV=1	S	Function unknown	hypothetical protein M91_19605 [Bos mutus]	--
Ovis_aries_newGene_18277	3.68783	4.65456	3.63453	9.81012	6.98896	6.97055	9.74559	4.59647	12.5956	7.31689	3.58672	0.000200603	1.01749	up	0.110715	0.605468	normal	0.211778	0.54527	normal	--	--	Cellular Component: fascia adherens (GO:0005916);; Molecular Function: beta-catenin binding (GO:0008013);; Cellular Component: lamellipodium (GO:0030027);; Molecular Function: cadherin binding (GO:0045296);; Molecular Function: actin filament binding (GO:0051015);; Biological Process: bundle of His cell-Purkinje myocyte adhesion involved in cell communication (GO:0086073);; Molecular Function: ce…	K09228|6.76096e-58|bta:100138479|K09228 KRAB domain-containing zinc finger protein | (RefSeq) zinc finger protein 510	--	[R]	General function prediction only	Reverse transcriptase (RNA-dependent DNA polymerase)	LINE-1 reverse transcriptase homolog OS=Nycticebus coucang OX=9470 PE=3 SV=1	S	Function unknown	hypothetical protein M91_14973, partial [Bos mutus]	cellular component: cell junction (GO:0030054);; molecular function: binding (GO:0005488);; cellular component: cell (GO:0005623);; cellular component: cell part (GO:0044464);; biological process: biological adhesion (GO:0022610);; biological process: single-organism process (GO:0044699);; biological process: signaling (GO:0023052);; biological process: multicellular organismal process (GO:003250…
Ovis_aries_newGene_20388	3.32396	4.36791	4.73771	3.64319	4.61287	5.31069	7.52421	8.38632	3.57284	4.59096	3.07223	0.839944	0.155153	normal	0.0050226	0.786354	up	0.98812	0.0129971	normal	--	--	Molecular Function: receptor binding (GO:0005102);; Cellular Component: peroxisome (GO:0005777);; Biological Process: putrescine biosynthetic process (GO:0009446);; Biological Process: putrescine catabolic process (GO:0009447);; Cellular Component: membrane (GO:0016020);; Biological Process: spermidine catabolic process (GO:0046203);; Biological Process: spermine catabolic process (GO:0046208);; …	K10838|2.22325e-07|oas:101109650|K10838 xeroderma pigmentosum group C-complementing protein | (RefSeq) XPC; XPC complex subunit, DNA damage recognition and repair factor	Nucleotide excision repair (ko03420)	--	--	--	--	U	Intracellular trafficking, secretion, and vesicular transport	PREDICTED: uncharacterized protein LOC109576555 [Bos indicus]	molecular function: binding (GO:0005488);; cellular component: cell (GO:0005623);; cellular component: organelle (GO:0043226);; cellular component: cell part (GO:0044464);; biological process: metabolic process (GO:0008152);; biological process: cellular process (GO:0009987);; cellular component: membrane (GO:0016020);; molecular function: catalytic activity (GO:0003824);; biological process: sin…
Ovis_aries_newGene_20412	2.52538	2.37311	1.98067	1.71352	3.14045	4.7572	4.0737	6.59082	3.66407	3.51869	2.4322	0.919279	0.11377	normal	0.00658997	0.942162	up	0.5068	0.363122	normal	--	--	--	--	--	--	--	--	--	--	--	--	--
Ovis_aries_newGene_21385	8.90357	10.6851	5.0643	8.08641	0.914104	24.1382	29.7456	9.25031	22.5829	7.39959	5.42932	0.874363	-0.129435	normal	0.0231703	0.901586	up	0.702538	0.269713	normal	--	--	--	--	--	--	--	--	--	--	--	serine-protein kinase ATM isoform X4 [Delphinapterus leucas]	--
Ovis_aries_newGene_21386	1.65864	1.85166	0.999663	1.68638	0.206226	4.3057	4.59591	1.68347	4.50585	1.41224	1.09952	0.908771	-0.102374	normal	0.0288248	0.869347	up	0.606392	0.33073	normal	--	--	--	--	--	--	--	--	LINE-1 reverse transcriptase homolog OS=Nycticebus coucang OX=9470 PE=3 SV=1	--	--	unnamed protein product [Canis lupus familiaris]	--
Ovis_aries_newGene_22156	0.551606	0.124931	0.875742	2.01392	0.88873	1.2681	4.31923	1.80402	0.176631	0.403568	0.641182	0.17325	0.665142	normal	0.000237145	1.28265	up	0.941557	-0.070717	normal	--	--	Molecular Function: actin binding (GO:0003779);; Molecular Function: phospholipid binding (GO:0005543);; Biological Process: metabolic process (GO:0008152);; Molecular Function: transferase activity (GO:0016740);;	K11433|1.94196e-33|pps:106635114|K11433 histone-lysine N-methyltransferase SETMAR [EC:2.1.1.43] | (RefSeq) histone-lysine N-methyltransferase SETMAR	Lysine degradation (ko00310)	--	--	--	Serine/threonine-protein phosphatase 2A 55 kDa regulatory subunit B beta isoform OS=Pongo abelii OX=9601 GN=PPP2R2B PE=2 SV=1	--	--	PREDICTED: histone-lysine N-methyltransferase SETMAR [Rhinolophus sinicus]	molecular function: binding (GO:0005488);; biological process: metabolic process (GO:0008152);; molecular function: catalytic activity (GO:0003824)
Ovis_aries_newGene_23387	0.026156	0.17518	0.24488	0.176333	0.394569	0.60066	1.17827	0.575874	0.272774	0.400619	0.481262	--	--	--	0.0156722	0.952494	up	--	--	--	--	--	--	--	--	--	--	--	--	--	--	--	--
Ovis_aries_newGene_23397	0.662624	0.3483	0.666946	0.760955	0.777628	1.07331	0.991678	1.29307	1.40616	0.980193	0.654067	0.522432	0.403921	normal	0.0400799	0.777335	up	0.313184	0.511436	normal	--	--	Biological Process: cellular macromolecule biosynthetic process (GO:0034645);; Biological Process: nucleobase-containing compound biosynthetic process (GO:0034654);; Biological Process: nucleic acid metabolic process (GO:0090304);;	K09228|1.22912e-50|bta:100138479|K09228 KRAB domain-containing zinc finger protein | (RefSeq) zinc finger protein 510	--	[R]	General function prediction only	Reverse transcriptase (RNA-dependent DNA polymerase)	--	S	Function unknown	reverse transcriptase-like [Bos taurus]	biological process: metabolic process (GO:0008152);; biological process: cellular process (GO:0009987)
Ovis_aries_newGene_2385	2.81075	1.80765	1.76616	3.10887	2.231	5.54346	2.49423	7.05317	1.80124	1.92743	1.29969	0.688767	0.296813	normal	0.0465166	0.842939	up	0.763856	-0.209339	normal	--	--	--	K02633|4.74532e-25|phd:102336840|K02633 period circadian protein | (RefSeq) PER2; period circadian clock 2	Circadian rhythm (ko04710);; Circadian entrainment (ko04713);; Herpes simplex infection (ko05168)	--	--	--	--	--	--	PREDICTED: LOW QUALITY PROTEIN: period circadian protein homolog 2 [Pantholops hodgsonii]	--
gene-ARRDC3	1.10147	0.555237	1.2852	4.66481	2.00992	2.33807	2.60572	3.34061	1.22697	1.16642	0.806046	0.0325559	0.911147	up	0.00332837	1.0561	up	0.992168	0.0110144	normal	--	--	Molecular Function: magnesium ion binding (GO:0000287);; Molecular Function: protein serine/threonine kinase activity (GO:0004674);; Molecular Function: ATP binding (GO:0005524);; Cellular Component: nucleus (GO:0005634);; Cellular Component: cytoplasm (GO:0005737);; Biological Process: protein phosphorylation (GO:0006468);; Biological Process: regulation of mitotic cell cycle (GO:0007346);; Mole…	K19008|1.96858e-29|phd:102333505|K19008 serine/threonine-protein kinase SIK1 [EC:2.7.11.1] | (RefSeq) SIK1; salt inducible kinase 1	Glucagon signaling pathway (ko04922)	--	--	--	--	T	Signal transduction mechanisms	PREDICTED: serine/threonine-protein kinase SIK1 isoform X3 [Ovis aries musimon]	molecular function: binding (GO:0005488);; molecular function: catalytic activity (GO:0003824);; biological process: metabolic process (GO:0008152);; biological process: cellular process (GO:0009987);; cellular component: cell (GO:0005623);; cellular component: organelle (GO:0043226);; cellular component: cell part (GO:0044464);; biological process: biological regulation (GO:0065007);; biological…
Ovis_aries_newGene_28753	0.35353	1.05362	0.554082	0.920316	0.507081	1.39762	1.47918	1.57364	0.458264	0.861823	1.28514	0.585148	0.383298	normal	6.13e-06	1.32115	up	0.439933	0.444234	normal	--	--	--	--	--	--	--	--	--	--	--	--	--
Ovis_aries_newGene_5239	3.47841	4.41967	4.91574	9.11898	8.42716	5.17647	15.6339	5.91993	5.67403	11.1977	5.19689	0.0126118	0.865485	up	0.110262	0.720573	normal	0.311365	0.516279	normal	[C]	Energy production and conversion	Molecular Function: L-aminoadipate-semialdehyde dehydrogenase activity (GO:0004043);; Cellular Component: nucleus (GO:0005634);; Cellular Component: mitochondrion (GO:0005739);; Cellular Component: cytosol (GO:0005829);; Molecular Function: betaine-aldehyde dehydrogenase activity (GO:0008802);; Biological Process: glycine betaine biosynthetic process from choline (GO:0019285);; Biological Process…	K14085|6.67079e-147|oas:101108127|K14085 aldehyde dehydrogenase family 7 member A1 [EC:1.2.1.31 1.2.1.8 1.2.1.3] | (RefSeq) ALDH7A1; aldehyde dehydrogenase 7 family member A1	Glycolysis / Gluconeogenesis (ko00010);; Ascorbate and aldarate metabolism (ko00053);; Fatty acid degradation (ko00071);; Glycine, serine and threonine metabolism (ko00260);; Valine, leucine and isoleucine degradation (ko00280);; Lysine biosynthesis (ko00300);; Lysine degradation (ko00310);; Arginine and proline metabolism (ko00330);; Histidine metabolism (ko00340);; Tryptophan metabolism (ko0038…	[C]	Energy production and conversion	Aldehyde dehydrogenase family	Alpha-aminoadipic semialdehyde dehydrogenase OS=Bos taurus OX=9913 GN=ALDH7A1 PE=2 SV=4	C	Energy production and conversion	PREDICTED: alpha-aminoadipic semialdehyde dehydrogenase isoform X2 [Pantholops hodgsonii]	molecular function: catalytic activity (GO:0003824);; biological process: metabolic process (GO:0008152);; biological process: single-organism process (GO:0044699);; cellular component: cell (GO:0005623);; cellular component: organelle (GO:0043226);; cellular component: cell part (GO:0044464);; biological process: cellular process (GO:0009987);; cellular component: extracellular region (GO:000557…
Ovis_aries_newGene_7177	0.579236	0.612904	0.914922	0.256759	0.249565	1.86287	0.806417	1.89513	0.555446	0.474486	0.039076	0.0549029	-0.838889	normal	0.0324029	0.860523	up	0.47842	-0.404978	normal	--	--	Molecular Function: nucleic acid binding (GO:0003676);; Molecular Function: RNA-directed DNA polymerase activity (GO:0003964);; Cellular Component: intracellular (GO:0005622);; Biological Process: RNA-dependent DNA biosynthetic process (GO:0006278);; Biological Process: regulation of transcription, DNA-templated (GO:0006355);;	K09228|2.76942e-48|oas:100527962|K09228 KRAB domain-containing zinc finger protein | (RefSeq) ZNF33B; zinc finger protein 33B	--	[R]	General function prediction only	--	--	S	Function unknown	reverse transcriptase-like [Bos taurus]	molecular function: binding (GO:0005488);; molecular function: catalytic activity (GO:0003824);; biological process: metabolic process (GO:0008152);; biological process: cellular process (GO:0009987);; cellular component: cell (GO:0005623);; cellular component: cell part (GO:0044464);; biological process: biological regulation (GO:0065007)
Ovis_aries_newGene_7387	0.051419	0.02239	0.038232	0.638055	0.630255	0.703827	0.057173	0.036589	0.094014	0.427745	0.538363	2.58e-12	2.05481	up	--	--	--	--	--	--	[X]	Mobilome: prophages, transposons	--	--	--	[R]	General function prediction only	Integrase core domain;; His(2)-Cys(2) zinc finger	LINE-1 reverse transcriptase homolog OS=Nycticebus coucang OX=9470 PE=3 SV=1	L	Replication, recombination and repair	PREDICTED: LOW QUALITY PROTEIN: uncharacterized protein LOC106978562 [Acinonyx jubatus]	--
Ovis_aries_newGene_8244	2.34671	1.91582	3.45784	3.48472	4.48126	0.803034	7.01034	2.27577	7.11046	3.29589	6.57649	0.233528	0.560992	normal	0.813671	0.209108	normal	0.0374124	0.817704	up	--	--	--	--	--	--	--	Reverse transcriptase (RNA-dependent DNA polymerase)	--	S	Function unknown	hypothetical protein M91_00313, partial [Bos mutus]	--
Ovis_aries_newGene_9709	0.9797	0.914757	0.786	1.88457	0.915958	2.7928	2.1332	2.64914	1.47707	1.05925	2.04083	0.422832	0.476689	normal	1.28e-07	1.33411	up	0.209088	0.564954	normal	--	--	Molecular Function: nucleic acid binding (GO:0003676);; Molecular Function: RNA-directed DNA polymerase activity (GO:0003964);; Cellular Component: intracellular (GO:0005622);; Cellular Component: fascia adherens (GO:0005916);; Biological Process: RNA-dependent DNA biosynthetic process (GO:0006278);; Biological Process: regulation of transcription, DNA-templated (GO:0006355);; Molecular Function:…	K09228|4.62745e-61|bta:100138479|K09228 KRAB domain-containing zinc finger protein | (RefSeq) zinc finger protein 510	--	--	--	Reverse transcriptase (RNA-dependent DNA polymerase);; Reverse transcriptase (RNA-dependent DNA polymerase)	--	S	Function unknown	reverse transcriptase-like [Bos taurus]	molecular function: binding (GO:0005488);; molecular function: catalytic activity (GO:0003824);; biological process: metabolic process (GO:0008152);; biological process: cellular process (GO:0009987);; cellular component: cell (GO:0005623);; cellular component: cell part (GO:0044464);; cellular component: cell junction (GO:0030054);; biological process: biological regulation (GO:0065007);; biolog…
Ovis_aries_newGene_9826	0.296214	0.103581	0.199419	1.17612	0.365799	2.24745	0.864612	5.37344	0.287755	0.53284	0.346014	0.0879568	0.771326	normal	9.5e-07	1.59262	up	0.417721	0.457399	normal	--	--	Molecular Function: nucleic acid binding (GO:0003676);; Molecular Function: RNA-directed DNA polymerase activity (GO:0003964);; Molecular Function: phospholipid binding (GO:0005543);; Cellular Component: intracellular (GO:0005622);; Cellular Component: fascia adherens (GO:0005916);; Biological Process: RNA-dependent DNA biosynthetic process (GO:0006278);; Biological Process: regulation of transcr…	--	--	--	--	--	--	S	Function unknown	reverse transcriptase-like [Bos taurus]	molecular function: binding (GO:0005488);; molecular function: catalytic activity (GO:0003824);; biological process: metabolic process (GO:0008152);; biological process: cellular process (GO:0009987);; cellular component: cell (GO:0005623);; cellular component: cell part (GO:0044464);; cellular component: cell junction (GO:0030054);; biological process: biological regulation (GO:0065007);; biolog…
gene-ABTB2	1.4622	1.98824	2.07541	3.01768	3.50231	0.850748	2.52175	1.22809	6.52031	1.7188	4.45287	0.024848	0.747846	up	0.896832	-0.125293	normal	0.103906	0.73493	normal	[T]	Signal transduction mechanisms	Cellular Component: nucleoplasm (GO:0005654);; Molecular Function: protein heterodimerization activity (GO:0046982);; Biological Process: cellular response to toxic substance (GO:0097237);;	K10521|0|chx:102181883|K10521 ankyrin repeat and BTB/POZ domain-containing protein 2 | (RefSeq) ABTB2; ankyrin repeat and BTB domain containing 2	--	--	--	BTB/POZ domain;; Ankyrin repeats (3 copies);; Ankyrin repeat;; Ankyrin repeats (many copies);; Ankyrin repeat;; Ankyrin repeats (many copies)	RCC1 and BTB domain-containing protein 2 OS=Pongo abelii OX=9601 GN=RCBTB2 PE=2 SV=1	S	Function unknown	PREDICTED: ankyrin repeat and BTB/POZ domain-containing protein 2 isoform X2 [Ovis aries musimon]	cellular component: cell (GO:0005623);; cellular component: organelle (GO:0043226);; cellular component: organelle part (GO:0044422);; cellular component: cell part (GO:0044464);; molecular function: binding (GO:0005488);; biological process: cellular process (GO:0009987);; biological process: response to stimulus (GO:0050896)
gene-ACADVL	128.105	139.417	130.316	187.984	209.483	130.402	256.079	136.698	240.193	221.694	230.42	0.00224853	0.634915	up	0.30056	0.417919	normal	2.28e-05	0.766533	up	[I]	Lipid transport and metabolism	Molecular Function: fatty-acyl-CoA binding (GO:0000062);; Biological Process: temperature homeostasis (GO:0001659);; Cellular Component: nucleolus (GO:0005730);; Cellular Component: mitochondrial inner membrane (GO:0005743);; Molecular Function: electron carrier activity (GO:0009055);; Molecular Function: very-long-chain-acyl-CoA dehydrogenase activity (GO:0017099);; Biological Process: epithelia…	K09479|0|oas:101117173|K09479 very long chain acyl-CoA dehydrogenase [EC:1.3.8.9] | (RefSeq) ACADVL; acyl-CoA dehydrogenase, very long chain	Fatty acid degradation (ko00071);; Fatty acid metabolism (ko01212)	[I]	Lipid transport and metabolism	Acyl-CoA dehydrogenase, C-terminal domain;; Acyl-CoA dehydrogenase, N-terminal domain;; Acyl-CoA dehydrogenase, middle domain;; Acyl-CoA dehydrogenase, C-terminal domain	Very long-chain specific acyl-CoA dehydrogenase, mitochondrial OS=Bos taurus OX=9913 GN=ACADVL PE=2 SV=3	I	Lipid transport and metabolism	PREDICTED: very long-chain specific acyl-CoA dehydrogenase, mitochondrial [Ovis aries]	molecular function: binding (GO:0005488);; biological process: multicellular organismal process (GO:0032501);; biological process: single-organism process (GO:0044699);; biological process: biological regulation (GO:0065007);; cellular component: cell (GO:0005623);; cellular component: organelle (GO:0043226);; cellular component: organelle part (GO:0044422);; cellular component: cell part (GO:004…
gene-ACOT11	4.94541	3.84373	9.0812	12.3098	7.54353	5.22543	24.5539	5.26184	21.3359	13.4302	21.8238	0.310925	0.556199	normal	0.595636	0.350083	normal	5.88e-05	1.21436	up	[I]	Lipid transport and metabolism	Molecular Function: lipid binding (GO:0008289);; Biological Process: response to cold (GO:0009409);; Cellular Component: extracellular exosome (GO:0070062);;	K12417|0|phd:102325042|K12417 acyl-CoA thioesteraes 11 [EC:3.1.2.-] | (RefSeq) ACOT11; acyl-CoA thioesterase 11	--	[I]	Lipid transport and metabolism	START domain;; Thioesterase superfamily	--	I	Lipid transport and metabolism	PREDICTED: acyl-coenzyme A thioesterase 11 isoform X3 [Ovis aries musimon]	molecular function: binding (GO:0005488);; biological process: response to stimulus (GO:0050896);; cellular component: extracellular region (GO:0005576);; cellular component: organelle (GO:0043226);; cellular component: extracellular region part (GO:0044421)
gene-ACSL1	139.611	134.716	155.645	200.265	238.863	85.421	287.319	100.816	292.141	204.122	231.133	0.000221442	0.6752	up	0.867624	0.147063	normal	0.000694033	0.713967	up	[I]	Lipid transport and metabolism	Biological Process: long-chain fatty acid metabolic process (GO:0001676);; Molecular Function: long-chain fatty acid-CoA ligase activity (GO:0004467);; Cellular Component: mitochondrion (GO:0005739);; Biological Process: lipid biosynthetic process (GO:0008610);; Cellular Component: integral component of membrane (GO:0016021);; Biological Process: adiponectin-activated signaling pathway (GO:003321…	K01897|0|oas:101110905|K01897 long-chain acyl-CoA synthetase [EC:6.2.1.3] | (RefSeq) ACSL1; acyl-CoA synthetase long-chain family member 1	Fatty acid biosynthesis (ko00061);; Fatty acid degradation (ko00071);; Fatty acid metabolism (ko01212);; PPAR signaling pathway (ko03320);; Peroxisome (ko04146);; Adipocytokine signaling pathway (ko04920)	[I]	Lipid transport and metabolism	AMP-binding enzyme	Long-chain-fatty-acid--CoA ligase 3 OS=Pongo abelii OX=9601 GN=ACSL3 PE=2 SV=2	I	Lipid transport and metabolism	PREDICTED: long-chain-fatty-acid--CoA ligase 1 isoform X1 [Ovis aries]	biological process: metabolic process (GO:0008152);; biological process: cellular process (GO:0009987);; biological process: single-organism process (GO:0044699);; molecular function: catalytic activity (GO:0003824);; cellular component: cell (GO:0005623);; cellular component: organelle (GO:0043226);; cellular component: cell part (GO:0044464);; cellular component: membrane (GO:0016020);; cellula…
gene-ADRA2B	4.20222	4.94171	4.62953	4.32848	6.75542	6.0227	6.28335	7.96181	4.59866	5.4134	3.0226	0.599174	0.300689	normal	0.0489565	0.59795	up	0.963136	-0.0371379	normal	--	--	Molecular Function: alpha2-adrenergic receptor activity (GO:0004938);; Cellular Component: integral component of plasma membrane (GO:0005887);; Biological Process: regulation of smooth muscle contraction (GO:0006940);; Biological Process: cell-cell signaling (GO:0007267);; Biological Process: regulation of vasoconstriction (GO:0019229);; Biological Process: platelet activation (GO:0030168);; Biol…	K04139|0|chx:102175860|K04139 adrenergic receptor alpha-2B | (RefSeq) ADRA2B; adrenoceptor alpha 2B	cGMP-PKG signaling pathway (ko04022);; Neuroactive ligand-receptor interaction (ko04080)	[R]	General function prediction only	7 transmembrane receptor (rhodopsin family);; Serpentine type 7TM GPCR chemoreceptor Srsx;; Olfactory receptor;; Serpentine type 7TM GPCR chemoreceptor Srx	Alpha-2B adrenergic receptor (Fragment) OS=Bos taurus OX=9913 GN=ADRA2B PE=3 SV=2	U	Intracellular trafficking, secretion, and vesicular transport	PREDICTED: alpha-2B adrenergic receptor [Ovis aries musimon]	molecular function: signal transducer activity (GO:0004871);; molecular function: molecular transducer activity (GO:0060089);; biological process: cellular process (GO:0009987);; biological process: signaling (GO:0023052);; biological process: single-organism process (GO:0044699);; biological process: response to stimulus (GO:0050896);; biological process: biological regulation (GO:0065007);; cel…
gene-ADRB2	10.2083	11.4504	12.9147	14.9741	9.94562	17.6829	16.5102	16.709	13.9932	10.3606	14.1793	0.818154	0.181954	normal	0.0217485	0.617489	up	0.768654	0.163994	normal	--	--	Biological Process: diet induced thermogenesis (GO:0002024);; Biological Process: norepinephrine-epinephrine-mediated vasodilation involved in regulation of systemic arterial blood pressure (GO:0002025);; Biological Process: regulation of sodium ion transport (GO:0002028);; Biological Process: desensitization of G-protein coupled receptor protein signaling pathway by arrestin (GO:0002032);; Molec…	K04142|0|oas:100170320|K04142 adrenergic receptor beta-2 | (RefSeq) ADRB2; adrenoceptor beta 2	Calcium signaling pathway (ko04020);; cGMP-PKG signaling pathway (ko04022);; cAMP signaling pathway (ko04024);; Neuroactive ligand-receptor interaction (ko04080);; Endocytosis (ko04144);; Adrenergic signaling in cardiomyocytes (ko04261);; Regulation of lipolysis in adipocytes (ko04923);; Renin secretion (ko04924);; Salivary secretion (ko04970)	[R]	General function prediction only	7 transmembrane receptor (rhodopsin family);; Serpentine type 7TM GPCR chemoreceptor Srsx;; Olfactory receptor;; Serpentine type 7TM GPCR chemoreceptor Srx	Beta-2 adrenergic receptor OS=Bos taurus OX=9913 GN=ADRB2 PE=2 SV=2	U	Intracellular trafficking, secretion, and vesicular transport	beta-2 adrenergic receptor [Ovis aries]	biological process: metabolic process (GO:0008152);; biological process: multicellular organismal process (GO:0032501);; biological process: single-organism process (GO:0044699);; biological process: biological regulation (GO:0065007);; molecular function: signal transducer activity (GO:0004871);; molecular function: molecular transducer activity (GO:0060089);; biological process: cellular proces…
gene-AGPAT2	9.66175	12.3098	10.1236	20.7647	23.3183	8.4388	16.8846	5.63921	19.8438	16.6506	18.8976	0.000137236	0.962837	up	0.982296	0.0218829	normal	0.0126306	0.694887	up	[I]	Lipid transport and metabolism	Biological Process: positive regulation of cytokine production (GO:0001819);; Molecular Function: 1-acylglycerol-3-phosphate O-acyltransferase activity (GO:0003841);; Cellular Component: endoplasmic reticulum (GO:0005783);; Biological Process: phosphatidic acid biosynthetic process (GO:0006654);; Cellular Component: integral component of membrane (GO:0016021);;	K13509|8.69878e-146|bom:102277646|K13509 lysophosphatidate acyltransferase [EC:2.3.1.51] | (RefSeq) AGPAT2; 1-acylglycerol-3-phosphate O-acyltransferase 2	Glycerolipid metabolism (ko00561);; Glycerophospholipid metabolism (ko00564);; Phospholipase D signaling pathway (ko04072);; Fat digestion and absorption (ko04975)	[I]	Lipid transport and metabolism	Acyltransferase	1-acyl-sn-glycerol-3-phosphate acyltransferase alpha OS=Bos taurus OX=9913 GN=AGPAT1 PE=2 SV=1	I	Lipid transport and metabolism	PREDICTED: 1-acyl-sn-glycerol-3-phosphate acyltransferase beta [Bos mutus]	biological process: biological regulation (GO:0065007);; molecular function: catalytic activity (GO:0003824);; cellular component: cell (GO:0005623);; cellular component: organelle (GO:0043226);; cellular component: cell part (GO:0044464);; biological process: metabolic process (GO:0008152);; biological process: cellular process (GO:0009987);; biological process: single-organism process (GO:00446…
gene-ALS2CL	5.96037	6.01948	6.20361	7.41461	5.51161	7.9603	9.93127	9.66674	7.78321	7.0908	6.53679	0.774742	0.179539	normal	0.000172423	0.679553	up	0.443268	0.24859	normal	[S]	Function unknown	Molecular Function: Rho guanyl-nucleotide exchange factor activity (GO:0005089);; Molecular Function: GTPase activator activity (GO:0005096);; Cellular Component: cytoplasm (GO:0005737);; Biological Process: endosome organization (GO:0007032);; Biological Process: regulation of Rho protein signal transduction (GO:0035023);; Molecular Function: identical protein binding (GO:0042802);; Biological P…	--	--	[R]	General function prediction only	MORN repeat;; Vacuolar sorting protein 9 (VPS9) domain	ALS2 C-terminal-like protein OS=Bos taurus OX=9913 GN=ALS2CL PE=2 SV=1	S	Function unknown	PREDICTED: ALS2 C-terminal-like protein isoform X4 [Ovis aries musimon]	molecular function: molecular function regulator (GO:0098772);; biological process: biological regulation (GO:0065007);; cellular component: cell (GO:0005623);; cellular component: cell part (GO:0044464);; biological process: cellular process (GO:0009987);; biological process: cellular component organization or biogenesis (GO:0071840);; molecular function: binding (GO:0005488)
gene-AMOTL1	18.2559	12.3615	11.335	21.5551	15.1889	13.3907	27.5907	12.5624	37.0231	20.6249	23.2877	0.462359	0.39482	normal	0.527164	0.350923	normal	0.0218964	0.769147	up	--	--	Biological Process: establishment of cell polarity involved in ameboidal cell migration (GO:0003365);; Cellular Component: bicellular tight junction (GO:0005923);; Cellular Component: COP9 signalosome (GO:0008180);; Biological Process: Wnt signaling pathway (GO:0016055);; Cellular Component: apical plasma membrane (GO:0016324);; Cellular Component: lamellipodium (GO:0030027);; Cellular Component:…	K06104|0|ssc:100513610|K06104 angiomotin like | (RefSeq) AMOTL1; angiomotin like 1	Tight junction (ko04530)	--	--	Angiomotin C terminal	Angiomotin-like protein 1 OS=Bos taurus OX=9913 GN=AMOTL1 PE=3 SV=1	Z	Cytoskeleton	PREDICTED: angiomotin-like protein 1 isoform X2 [Bos taurus]	biological process: cellular process (GO:0009987);; biological process: single-organism process (GO:0044699);; cellular component: cell junction (GO:0030054);; cellular component: cell (GO:0005623);; cellular component: macromolecular complex (GO:0032991);; cellular component: organelle (GO:0043226);; cellular component: organelle part (GO:0044422);; cellular component: cell part (GO:0044464);; b…
gene-ANKRD1	88.3384	94.3749	56.6318	109.074	50.9644	154.081	240.021	164.598	146.229	55.8585	160.044	0.951532	0.0767758	normal	2.4e-05	1.09258	up	0.46747	0.404875	normal	[D]	Cell cycle control, cell division, chromosome partitioning	Molecular Function: RNA polymerase II transcription factor binding (GO:0001085);; Molecular Function: RNA polymerase II transcription coactivator activity (GO:0001105);; Molecular Function: p53 binding (GO:0002039);; Molecular Function: DNA binding (GO:0003677);; Molecular Function: transcription corepressor activity (GO:0003714);; Molecular Function: actin binding (GO:0003779);; Cellular Compone…	--	--	[R]	General function prediction only	Ankyrin repeats (3 copies);; Ankyrin repeats (many copies);; Ankyrin repeat;; Ankyrin repeats (many copies);; Ankyrin repeat	Ankyrin repeat domain-containing protein 1 OS=Sus scrofa OX=9823 GN=ANKRD1 PE=2 SV=1	S	Function unknown	ankyrin repeat domain-containing protein 1 [Ovis aries]	molecular function: binding (GO:0005488);; molecular function: transcription factor activity, protein binding (GO:0000988);; biological process: metabolic process (GO:0008152);; biological process: cellular process (GO:0009987);; biological process: biological regulation (GO:0065007);; cellular component: cell (GO:0005623);; cellular component: macromolecular complex (GO:0032991);; cellular compo…
gene-AQP7	4.32979	4.4802	3.52249	7.43707	7.7923	2.77343	22.2797	4.53273	6.38612	8.51995	6.26962	0.00174998	0.838891	up	0.538374	0.376766	normal	0.0541841	0.660633	normal	[G]	Carbohydrate transport and metabolism	Cellular Component: integral component of plasma membrane (GO:0005887);; Biological Process: cellular water homeostasis (GO:0009992);; Molecular Function: urea transmembrane transporter activity (GO:0015204);; Molecular Function: water channel activity (GO:0015250);; Molecular Function: glycerol channel activity (GO:0015254);; Biological Process: glycerol transport (GO:0015793);; Biological Proce…	K08771|0|oas:101103697|K08771 aquaporin-7 | (RefSeq) AQP7; aquaporin 7	PPAR signaling pathway (ko03320);; Regulation of lipolysis in adipocytes (ko04923)	[G]	Carbohydrate transport and metabolism	Major intrinsic protein	Aquaporin-7 OS=Macaca fascicularis OX=9541 GN=AQP7 PE=2 SV=1	G	Carbohydrate transport and metabolism	PREDICTED: aquaporin-7 isoform X1 [Ovis aries]	cellular component: cell (GO:0005623);; cellular component: membrane (GO:0016020);; cellular component: membrane part (GO:0044425);; cellular component: cell part (GO:0044464);; biological process: cellular process (GO:0009987);; biological process: single-organism process (GO:0044699);; biological process: biological regulation (GO:0065007);; biological process: cellular component organization o…
gene-ARID5A	0.339049	0.149584	0.770359	1.3713	0.746013	1.57921	1.73839	2.25168	0.846328	0.231945	1.07869	0.340233	0.526513	normal	0.001373	1.16632	up	0.67555	0.269916	normal	--	--	Cellular Component: nucleoplasm (GO:0005654);; Cellular Component: nucleolus (GO:0005730);; Biological Process: regulation of transcription from RNA polymerase II promoter (GO:0006357);; Molecular Function: transcription regulatory region DNA binding (GO:0044212);;	--	--	[K]	Transcription	ARID/BRIGHT DNA binding domain	AT-rich interactive domain-containing protein 5A OS=Bos taurus OX=9913 GN=ARID5A PE=2 SV=1	S	Function unknown	PREDICTED: AT-rich interactive domain-containing protein 5A isoform X3 [Ovis aries musimon]	cellular component: cell (GO:0005623);; cellular component: organelle (GO:0043226);; cellular component: organelle part (GO:0044422);; cellular component: cell part (GO:0044464);; biological process: biological regulation (GO:0065007);; molecular function: binding (GO:0005488)
gene-ARID5B	7.87854	7.29107	14.9997	15.8639	9.7332	48.975	44.0407	39.7577	3.4175	7.1416	11.7606	0.643117	0.324614	normal	4.61e-13	1.79209	up	0.78421	-0.207198	normal	--	--	Biological Process: negative regulation of transcription from RNA polymerase II promoter (GO:0000122);; Molecular Function: RNA polymerase II regulatory region sequence-specific DNA binding (GO:0000977);; Molecular Function: transcriptional repressor activity, RNA polymerase II transcription regulatory region sequence-specific binding (GO:0001227);; Biological Process: kidney development (GO:0001…	--	--	[K]	Transcription	ARID/BRIGHT DNA binding domain	AT-rich interactive domain-containing protein 5B OS=Bos taurus OX=9913 GN=ARID5B PE=3 SV=1	K	Transcription	PREDICTED: AT-rich interactive domain-containing protein 5B isoform X1 [Capra hircus]	biological process: biological regulation (GO:0065007);; molecular function: binding (GO:0005488);; molecular function: nucleic acid binding transcription factor activity (GO:0001071);; biological process: multicellular organismal process (GO:0032501);; biological process: developmental process (GO:0032502);; biological process: single-organism process (GO:0044699);; molecular function: transcrip…
gene-ARRDC2	73.717	42.4792	73.4304	83.1997	66.5524	179.553	149.632	111.544	77.3542	95.2621	46.6022	0.616629	0.2959	normal	7.9e-05	1.09506	up	0.77011	0.192917	normal	--	--	Cellular Component: plasma membrane (GO:0005886);; Biological Process: signal transduction (GO:0007165);; Cellular Component: cytoplasmic vesicle (GO:0031410);;	--	--	[R]	General function prediction only	Arrestin (or S-antigen), N-terminal domain;; Arrestin (or S-antigen), C-terminal domain	Arrestin domain-containing protein 3 OS=Pongo abelii OX=9601 GN=ARRDC3 PE=2 SV=1	S	Function unknown	PREDICTED: arrestin domain-containing protein 2 isoform X2 [Ovis aries musimon]	cellular component: cell (GO:0005623);; cellular component: membrane (GO:0016020);; cellular component: cell part (GO:0044464);; biological process: cellular process (GO:0009987);; biological process: biological regulation (GO:0065007);; cellular component: organelle (GO:0043226)
gene-ARRDC3	6.68074	4.13532	5.86632	16.1264	8.88156	11.3141	10.0337	12.6553	5.94168	8.27411	6.38908	0.00174008	1.03048	up	0.000898049	0.957184	up	0.939869	0.0508535	normal	--	--	Cellular Component: lysosome (GO:0005764);; Cellular Component: early endosome (GO:0005769);; Cellular Component: plasma membrane (GO:0005886);; Biological Process: negative regulation of heat generation (GO:0031651);; Molecular Function: beta-3 adrenergic receptor binding (GO:0031699);; Biological Process: skin development (GO:0043588);; Biological Process: negative regulation of multicellular o…	--	--	[R]	General function prediction only	Arrestin (or S-antigen), N-terminal domain;; Arrestin (or S-antigen), C-terminal domain	Arrestin domain-containing protein 3 OS=Bos taurus OX=9913 GN=ARRDC3 PE=2 SV=1	S	Function unknown	arrestin domain-containing protein 3 [Camelus ferus]	cellular component: cell (GO:0005623);; cellular component: organelle (GO:0043226);; cellular component: cell part (GO:0044464);; cellular component: membrane (GO:0016020);; biological process: biological regulation (GO:0065007);; molecular function: binding (GO:0005488);; biological process: multicellular organismal process (GO:0032501);; biological process: developmental process (GO:0032502);; …
gene-ATP6V0E2	0.733894	1.31898	0.661903	1.27375	1.3983	1.86714	1.82022	1.84211	0.86047	1.98394	0.821425	0.548943	0.399949	normal	0.0316761	0.813872	up	0.727242	0.251664	normal	--	--	Biological Process: ATP hydrolysis coupled proton transport (GO:0015991);; Cellular Component: integral component of membrane (GO:0016021);; Cellular Component: proton-transporting V-type ATPase, V0 domain (GO:0033179);; Molecular Function: proton-transporting ATPase activity, rotational mechanism (GO:0046961);;	K02153|3.05384e-75|oas:101122020|K02153 V-type H+-transporting ATPase subunit e | (RefSeq) ATP6V0E2; ATPase H+ transporting V0 subunit e2	Oxidative phosphorylation (ko00190);; Phagosome (ko04145);; Synaptic vesicle cycle (ko04721);; Collecting duct acid secretion (ko04966);; Rheumatoid arthritis (ko05323)	[C]	Energy production and conversion	ATP synthase subunit H	V-type proton ATPase subunit e 2 OS=Bos taurus OX=9913 GN=ATP6V0E2 PE=3 SV=1	C	Energy production and conversion	PREDICTED: V-type proton ATPase subunit e 2 [Ovis aries]	biological process: single-organism process (GO:0044699);; biological process: localization (GO:0051179);; cellular component: membrane (GO:0016020);; cellular component: membrane part (GO:0044425);; cellular component: macromolecular complex (GO:0032991);; molecular function: catalytic activity (GO:0003824);; molecular function: transporter activity (GO:0005215)
gene-AVPI1	8.72853	7.31613	8.38405	15.8065	11.035	6.97417	15.0769	9.64358	21.3712	8.09224	9.78251	0.0492876	0.68257	up	0.42513	0.38335	normal	0.336455	0.477498	normal	--	--	Biological Process: activation of MAPK activity (GO:0000187);; Biological Process: cell cycle (GO:0007049);;	--	--	--	--	Thyroid cancer protein 1	Arginine vasopressin-induced protein 1 OS=Bos taurus OX=9913 GN=AVPI1 PE=2 SV=1	O	Posttranslational modification, protein turnover, chaperones	PREDICTED: arginine vasopressin-induced protein 1 isoform X2 [Bison bison bison]	biological process: biological regulation (GO:0065007);; biological process: cellular process (GO:0009987);; biological process: single-organism process (GO:0044699)
gene-C9H8orf82	3.11817	2.78658	2.40459	3.00431	4.66764	5.32344	5.84843	4.57412	4.33299	4.39567	3.51681	0.478067	0.411629	normal	0.00134721	0.872907	up	0.266097	0.466256	normal	--	--	--	--	--	--	--	Domain of unknown function (DUF4505)	UPF0598 protein C8orf82 homolog OS=Bos taurus OX=9913 PE=2 SV=1	S	Function unknown	PREDICTED: UPF0598 protein C8orf82 homolog [Ovis aries]	--
gene-CA12	1.56231	2.0919	1.96222	6.27516	3.55466	3.85411	2.38836	1.4158	2.39748	4.63389	0.993426	0.00161922	1.06459	up	0.538374	0.390495	normal	0.662826	0.292858	normal	[P]	Inorganic ion transport and metabolism	Molecular Function: carbonate dehydratase activity (GO:0004089);; Biological Process: one-carbon metabolic process (GO:0006730);; Molecular Function: zinc ion binding (GO:0008270);; Cellular Component: integral component of membrane (GO:0016021);; Biological Process: chloride ion homeostasis (GO:0055064);;	K01672|0|chx:102171159|K01672 carbonic anhydrase [EC:4.2.1.1] | (RefSeq) CA12; carbonic anhydrase 12	Nitrogen metabolism (ko00910)	[R]	General function prediction only	Eukaryotic-type carbonic anhydrase	Carbonic anhydrase 12 OS=Oryctolagus cuniculus OX=9986 GN=CA12 PE=2 SV=2	P	Inorganic ion transport and metabolism	PREDICTED: carbonic anhydrase 12 isoform X5 [Ovis aries musimon]	molecular function: catalytic activity (GO:0003824);; biological process: metabolic process (GO:0008152);; biological process: cellular process (GO:0009987);; biological process: single-organism process (GO:0044699);; molecular function: binding (GO:0005488);; cellular component: membrane (GO:0016020);; cellular component: membrane part (GO:0044425);; biological process: biological regulation (GO…
gene-CASTOR2	58.199	60.8892	66.1405	64.7665	72.0133	104.754	76.634	116.657	71.1276	64.7732	67.6232	0.463659	0.241892	normal	0.0207141	0.706089	up	0.637631	0.162413	normal	[S]	Function unknown	--	--	--	--	--	ACT domain	Cytosolic arginine sensor for mTORC1 subunit 1 OS=Bos taurus OX=9913 GN=CASTOR1 PE=2 SV=1	S	Function unknown	PREDICTED: GATS-like protein 2 [Bos taurus]	--
gene-CCDC58	16.1959	17.7756	16.0991	23.7106	25.9829	15.0636	28.27	13.9311	29.2557	21.5898	19.0573	0.0352232	0.606975	up	0.724597	0.219734	normal	0.260441	0.421081	normal	--	--	Cellular Component: mitochondrion (GO:0005739);;	--	--	[RD]	General function prediction only;; Cell cycle control, cell division, chromosome partitioning	Caffeine-induced death protein 2	Coiled-coil domain-containing protein 58 OS=Bos taurus OX=9913 GN=CCDC58 PE=2 SV=1	S	Function unknown	coiled-coil domain-containing protein 58 [Sus scrofa]	cellular component: cell (GO:0005623);; cellular component: organelle (GO:0043226);; cellular component: cell part (GO:0044464)
gene-CCDC71L	1.5731	1.0767	1.12876	0.971599	1.94445	3.02141	7.32807	4.40574	0.959212	0.977188	1.47349	0.889644	0.150109	normal	2.83e-05	1.34433	up	0.96223	-0.0471162	normal	--	--	--	--	--	--	--	Coiled-coil domain-containing protein 71L	Coiled-coil domain-containing protein 71 OS=Bos taurus OX=9913 GN=CCDC71 PE=2 SV=1	S	Function unknown	PREDICTED: coiled-coil domain-containing protein 71L [Capra hircus]	--
gene-CDC42EP4	5.46047	5.94317	5.91963	4.51637	8.94685	8.47629	8.64116	9.54674	4.8724	6.05635	3.53996	0.815572	0.191207	normal	0.0032309	0.701503	up	0.722311	-0.196343	normal	--	--	Molecular Function: GTPase activator activity (GO:0005096);; Cellular Component: cytoplasm (GO:0005737);; Cellular Component: plasma membrane (GO:0005886);; Biological Process: Rho protein signal transduction (GO:0007266);; Biological Process: regulation of cell shape (GO:0008360);; Cellular Component: actin cytoskeleton (GO:0015629);; Cellular Component: microtubule cytoskeleton (GO:0015630);; M…	--	--	--	--	Cdc42 effector;; P21-Rho-binding domain	Cdc42 effector protein 1 OS=Bos taurus OX=9913 GN=CDC42EP1 PE=2 SV=1	U	Intracellular trafficking, secretion, and vesicular transport	PREDICTED: cdc42 effector protein 4-like [Ovis aries musimon]	molecular function: molecular function regulator (GO:0098772);; biological process: biological regulation (GO:0065007);; cellular component: cell (GO:0005623);; cellular component: cell part (GO:0044464);; cellular component: membrane (GO:0016020);; biological process: cellular process (GO:0009987);; biological process: signaling (GO:0023052);; biological process: single-organism process (GO:0044…
gene-CDPF1	23.6613	24.4696	22.1878	31.2873	38.1734	28.3717	29.9108	27.3099	27.6985	38.8393	28.7177	0.0238685	0.593296	up	0.17069	0.386146	normal	0.25598	0.415332	normal	--	--	--	--	--	[S]	Function unknown	Cysteine-rich domain	Cysteine-rich DPF motif domain-containing protein 1 OS=Bos taurus OX=9913 GN=CDPF1 PE=2 SV=1	S	Function unknown	PREDICTED: cysteine-rich DPF motif domain-containing protein 1 isoform X1 [Ovis aries]	--
gene-CEBPB	20.0288	19.3662	26.8398	38.312	34.1062	31.3984	47.5947	60.6935	11.8924	18.6427	26.3794	0.00801296	0.720242	up	0.000423202	0.98348	up	0.889358	-0.110056	normal	--	--	Cellular Component: condensed chromosome, centromeric region (GO:0000779);; Cellular Component: nuclear chromatin (GO:0000790);; Molecular Function: RNA polymerase II regulatory region sequence-specific DNA binding (GO:0000977);; Molecular Function: transcriptional activator activity, RNA polymerase II core promoter proximal region sequence-specific binding (GO:0001077);; Biological Process: ovar…	K10048|6.21792e-129|bta:338319|K10048 CCAAT/enhancer binding protein (C/EBP), beta | (RefSeq) CEBPB; CCAAT/enhancer binding protein (C/EBP), beta	TNF signaling pathway (ko04668);; Tuberculosis (ko05152);; Transcriptional misregulation in cancer (ko05202)	[K]	Transcription	Basic region leucine zipper	CCAAT/enhancer-binding protein beta OS=Bos taurus OX=9913 GN=CEBPB PE=3 SV=1	S	Function unknown	PREDICTED: CCAAT/enhancer-binding protein beta [Odobenus rosmarus divergens]	cellular component: cell (GO:0005623);; cellular component: organelle (GO:0043226);; cellular component: organelle part (GO:0044422);; cellular component: cell part (GO:0044464);; cellular component: membrane-enclosed lumen (GO:0031974);; molecular function: binding (GO:0005488);; molecular function: nucleic acid binding transcription factor activity (GO:0001071);; biological process: metabolic p…
gene-CEBPD	23.0075	10.2177	31.4022	72.7492	50.2582	50.8274	92.5959	92.0593	16.6167	35.8026	34.6683	0.00693034	1.02762	up	6.98e-06	1.38378	up	0.622731	0.312672	normal	--	--	Molecular Function: transcription factor activity, sequence-specific DNA binding (GO:0003700);; Cellular Component: nucleus (GO:0005634);; Biological Process: regulation of transcription, DNA-templated (GO:0006355);; Molecular Function: sequence-specific DNA binding (GO:0043565);;	K10050|9.07344e-115|ssc:100153946|K10050 CCAAT/enhancer binding protein (C/EBP), delta | (RefSeq) CEBPD; CCAAT/enhancer binding protein delta	--	[K]	Transcription	Basic region leucine zipper	CCAAT/enhancer-binding protein delta OS=Bos taurus OX=9913 GN=CEBPD PE=2 SV=1	K	Transcription	CCAAT/enhancer-binding protein delta [Sus scrofa]	molecular function: nucleic acid binding transcription factor activity (GO:0001071);; biological process: biological regulation (GO:0065007);; cellular component: cell (GO:0005623);; cellular component: organelle (GO:0043226);; cellular component: cell part (GO:0044464);; molecular function: binding (GO:0005488)
gene-CLDND1	4.20843	4.15603	3.88022	3.01216	4.00931	4.65569	11.0463	6.01099	5.10115	4.06229	4.15579	0.957688	-0.0476836	normal	0.0105911	0.766145	up	0.769433	0.15055	normal	--	--	Cellular Component: integral component of membrane (GO:0016021);; Cellular Component: apical plasma membrane (GO:0016324);;	--	--	--	--	PMP-22/EMP/MP20/Claudin tight junction;; PMP-22/EMP/MP20/Claudin family	Claudin domain-containing protein 1 OS=Pongo abelii OX=9601 GN=CLDND1 PE=2 SV=1	U	Intracellular trafficking, secretion, and vesicular transport	PREDICTED: claudin domain-containing protein 1 isoform X2 [Bubalus bubalis]	cellular component: membrane (GO:0016020);; cellular component: membrane part (GO:0044425);; cellular component: cell (GO:0005623);; cellular component: cell part (GO:0044464)
gene-CPM	1.34836	1.54825	1.90511	2.37255	2.08075	2.82689	3.20723	2.12425	1.0399	1.12742	1.22698	0.29973	0.474299	normal	0.0135933	0.743177	up	0.453992	-0.356466	normal	[O]	Posttranslational modification, protein turnover, chaperones	Molecular Function: metallocarboxypeptidase activity (GO:0004181);; Molecular Function: serine-type carboxypeptidase activity (GO:0004185);; Cellular Component: extracellular space (GO:0005615);; Cellular Component: plasma membrane (GO:0005886);; Biological Process: peptide metabolic process (GO:0006518);; Molecular Function: zinc ion binding (GO:0008270);; Cellular Component: cell surface (GO:00…	K01296|0|oas:101104474|K01296 carboxypeptidase M [EC:3.4.17.12] | (RefSeq) CPM; carboxypeptidase M	--	[R]	General function prediction only	Zinc carboxypeptidase;; Carboxypeptidase regulatory-like domain	Carboxypeptidase M OS=Pongo abelii OX=9601 GN=CPM PE=2 SV=1	E	Amino acid transport and metabolism	PREDICTED: carboxypeptidase M [Ovis aries]	molecular function: catalytic activity (GO:0003824);; biological process: metabolic process (GO:0008152);; cellular component: extracellular region (GO:0005576);; cellular component: extracellular region part (GO:0044421);; cellular component: cell (GO:0005623);; cellular component: membrane (GO:0016020);; cellular component: cell part (GO:0044464);; biological process: cellular process (GO:00099…
gene-CPNE9	0.091454	0.029211	0.121838	0.569397	1.32495	0.174342	0.185425	0.614408	0.128316	0.54469	0.378865	0.00212248	1.0853	up	--	--	--	--	--	--	--	--	Cellular Component: extracellular space (GO:0005615);; Cellular Component: extracellular exosome (GO:0070062);; Biological Process: positive regulation of dendrite extension (GO:1903861);;	--	--	[T]	Signal transduction mechanisms	Copine;; C2 domain	Copine-1 OS=Bos taurus OX=9913 GN=CPNE1 PE=1 SV=1	S	Function unknown	PREDICTED: copine-9 isoform X4 [Ovis aries musimon]	cellular component: extracellular region (GO:0005576);; cellular component: extracellular region part (GO:0044421);; cellular component: organelle (GO:0043226);; biological process: cellular process (GO:0009987);; biological process: multicellular organismal process (GO:0032501);; biological process: developmental process (GO:0032502);; biological process: single-organism process (GO:0044699);; b…
gene-CREB5	1.59758	1.3208	1.91991	2.49467	1.88341	4.19983	4.09286	2.92985	1.21373	1.00823	1.88278	0.371014	0.427108	normal	8.23e-06	1.11847	up	0.794442	-0.181306	normal	--	--	Molecular Function: transcription factor activity, sequence-specific DNA binding (GO:0003700);; Molecular Function: sequence-specific DNA binding (GO:0043565);; Biological Process: positive regulation of transcription, DNA-templated (GO:0045893);; Cellular Component: extracellular exosome (GO:0070062);;	K09047|6.0781e-73|phd:102314966|K09047 cyclic AMP-responsive element-binding protein 5 | (RefSeq) CREB5; cAMP responsive element binding protein 5	cGMP-PKG signaling pathway (ko04022);; cAMP signaling pathway (ko04024);; PI3K-Akt signaling pathway (ko04151);; AMPK signaling pathway (ko04152);; Longevity regulating pathway (ko04211);; Adrenergic signaling in cardiomyocytes (ko04261);; TNF signaling pathway (ko04668);; Cholinergic synapse (ko04725);; Dopaminergic synapse (ko04728);; Insulin secretion (ko04911);; Estrogen signaling pathway (ko…	[K]	Transcription	bZIP transcription factor;; Basic region leucine zipper;; bZIP Maf transcription factor	Cyclic AMP-dependent transcription factor ATF-7 OS=Pongo abelii OX=9601 GN=ATF7 PE=2 SV=1	K	Transcription	PREDICTED: cyclic AMP-responsive element-binding protein 5 isoform X3 [Ailuropoda melanoleuca]	molecular function: nucleic acid binding transcription factor activity (GO:0001071);; biological process: biological regulation (GO:0065007);; molecular function: binding (GO:0005488);; cellular component: extracellular region (GO:0005576);; cellular component: organelle (GO:0043226);; cellular component: extracellular region part (GO:0044421)
gene-CYP1A1	1.39304	1.07512	1.1042	3.78782	1.47224	2.38482	1.19523	2.24433	8.73662	2.47445	2.46388	0.15491	0.714931	normal	0.26673	0.57758	normal	0.00553494	1.04338	up	[QV]	Secondary metabolites biosynthesis, transport and catabolism;; Defense mechanisms	Molecular Function: iron ion binding (GO:0005506);; Cellular Component: endoplasmic reticulum membrane (GO:0005789);; Biological Process: amine metabolic process (GO:0009308);; Biological Process: toxin metabolic process (GO:0009404);; Biological Process: response to toxic substance (GO:0009636);; Biological Process: drug metabolic process (GO:0017144);; Molecular Function: heme binding (GO:00200…	K07408|0|phd:102320923|K07408 cytochrome P450 family 1 subfamily A polypeptide 1 [EC:1.14.14.1] | (RefSeq) cytochrome P450 1A1-like	Steroid hormone biosynthesis (ko00140);; Tryptophan metabolism (ko00380);; Retinol metabolism (ko00830);; Metabolism of xenobiotics by cytochrome P450 (ko00980);; Ovarian steroidogenesis (ko04913);; Chemical carcinogenesis (ko05204)	[Q]	Secondary metabolites biosynthesis, transport and catabolism	Cytochrome P450	Cytochrome P450 1A1 OS=Ovis aries OX=9940 GN=CYP1A1 PE=2 SV=1	Q	Secondary metabolites biosynthesis, transport and catabolism	RecName: Full=Cytochrome P450 1A1; AltName: Full=CYPIA1; AltName: Full=Cytochrome P450-C; AltName: Full=Cytochrome P4501A1	molecular function: binding (GO:0005488);; cellular component: cell (GO:0005623);; cellular component: membrane (GO:0016020);; cellular component: organelle (GO:0043226);; cellular component: organelle part (GO:0044422);; cellular component: membrane part (GO:0044425);; cellular component: cell part (GO:0044464);; biological process: metabolic process (GO:0008152);; biological process: cellular p…
gene-DCXR	7.10351	8.14664	7.87326	10.4036	14.6433	8.25403	14.7352	7.51297	12.4022	16.6645	10.5162	0.0439216	0.668108	up	0.369229	0.410793	normal	0.0569034	0.657681	normal	[IQR]	Lipid transport and metabolism;; Secondary metabolites biosynthesis, transport and catabolism;; General function prediction only	Molecular Function: carbonyl reductase (NADPH) activity (GO:0004090);; Cellular Component: nucleus (GO:0005634);; Cellular Component: mitochondrion (GO:0005739);; Cellular Component: cytoplasmic microtubule (GO:0005881);; Cellular Component: microvillus (GO:0005902);; Cellular Component: brush border (GO:0005903);; Biological Process: xylulose metabolic process (GO:0005997);; Biological Process: …	K03331|6.95282e-168|chx:102191238|K03331 L-xylulose reductase [EC:1.1.1.10] | (RefSeq) L-xylulose reductase	Pentose and glucuronate interconversions (ko00040)	[Q]	Secondary metabolites biosynthesis, transport and catabolism	Enoyl-(Acyl carrier protein) reductase;; short chain dehydrogenase;; KR domain;; NAD dependent epimerase/dehydratase family	L-xylulose reductase OS=Bos taurus OX=9913 GN=DCXR PE=2 SV=1	S	Function unknown	PREDICTED: L-xylulose reductase [Ovis aries musimon]	molecular function: catalytic activity (GO:0003824);; biological process: metabolic process (GO:0008152);; biological process: single-organism process (GO:0044699);; cellular component: cell (GO:0005623);; cellular component: organelle (GO:0043226);; cellular component: cell part (GO:0044464);; cellular component: organelle part (GO:0044422);; cellular component: supramolecular complex (GO:009908…
gene-DECR2	4.058	6.98392	5.76989	9.8339	8.22702	5.20695	11.6314	7.11975	16.8498	12.9776	11.1085	0.20961	0.587539	normal	0.393617	0.450691	normal	0.000530561	1.01084	up	[IQR]	Lipid transport and metabolism;; Secondary metabolites biosynthesis, transport and catabolism;; General function prediction only	Molecular Function: receptor binding (GO:0005102);; Biological Process: unsaturated fatty acid biosynthetic process (GO:0006636);; Molecular Function: queuine tRNA-ribosyltransferase activity (GO:0008479);; Molecular Function: 2,4-dienoyl-CoA reductase (NADPH) activity (GO:0008670);; Molecular Function: trans-2-enoyl-CoA reductase (NADPH) activity (GO:0019166);; Biological Process: oxidation-redu…	K13237|0|phd:102328168|K13237 peroxisomal 2,4-dienoyl-CoA reductase [EC:1.3.1.34] | (RefSeq) DECR2; 2,4-dienoyl-CoA reductase 2	Peroxisome (ko04146)	[R]	General function prediction only	Enoyl-(Acyl carrier protein) reductase;; short chain dehydrogenase;; KR domain	Peroxisomal 2,4-dienoyl-CoA reductase OS=Pongo abelii OX=9601 GN=DECR2 PE=2 SV=1	S	Function unknown	Peroxisomal 2,4-dienoyl-CoA reductase, partial [Bos mutus]	molecular function: binding (GO:0005488);; biological process: metabolic process (GO:0008152);; biological process: cellular process (GO:0009987);; biological process: single-organism process (GO:0044699);; molecular function: catalytic activity (GO:0003824)
gene-DUSP28	4.84626	6.22979	7.19538	6.25652	7.77398	10.756	9.07081	11.9511	6.84433	7.62805	7.03652	0.670089	0.255403	normal	0.00895877	0.782114	up	0.631486	0.233056	normal	--	--	Molecular Function: protein tyrosine/serine/threonine phosphatase activity (GO:0008138);; Biological Process: peptidyl-tyrosine dephosphorylation (GO:0035335);;	K14165|1.10037e-65|ssc:100627104|K14165 atypical dual specificity phosphatase [EC:3.1.3.16 3.1.3.48] | (RefSeq) DUSP28; dual specificity phosphatase 28	--	[V]	Defense mechanisms	Dual specificity phosphatase, catalytic domain	Dual specificity protein phosphatase 14 OS=Bos taurus OX=9913 GN=DUSP14 PE=2 SV=1	T	Signal transduction mechanisms	PREDICTED: dual specificity phosphatase 28-like [Ovis aries musimon]	molecular function: catalytic activity (GO:0003824);; biological process: metabolic process (GO:0008152);; biological process: cellular process (GO:0009987)
gene-E2F6	6.35156	5.49862	7.5773	10.4669	10.9811	5.154	11.7517	5.3814	9.4847	6.89245	9.55048	0.00140323	0.750578	up	0.727154	0.230716	normal	0.298059	0.390801	normal	--	--	Biological Process: regulation of transcription involved in G1/S transition of mitotic cell cycle (GO:0000083);; Molecular Function: DNA binding (GO:0003677);; Molecular Function: transcription factor activity, sequence-specific DNA binding (GO:0003700);; Cellular Component: transcription factor complex (GO:0005667);; Cellular Component: MLL1 complex (GO:0071339);;	K09390|2.96881e-180|bta:514085|K09390 transcription factor E2F6 | (RefSeq) E2F6; E2F transcription factor 6	--	[K]	Transcription	E2F transcription factor CC-MB domain;; E2F/DP family winged-helix DNA-binding domain	Transcription factor E2F6 OS=Bos taurus OX=9913 GN=E2F6 PE=2 SV=1	K	Transcription	PREDICTED: transcription factor E2F6 isoform X2 [Ovis aries musimon]	biological process: cellular process (GO:0009987);; biological process: single-organism process (GO:0044699);; biological process: biological regulation (GO:0065007);; molecular function: binding (GO:0005488);; molecular function: nucleic acid binding transcription factor activity (GO:0001071);; cellular component: cell (GO:0005623);; cellular component: macromolecular complex (GO:0032991);; cell…
gene-ECHDC3	13.4271	11.0171	17.5041	11.1702	25.2259	31.4848	38.011	22.5128	15.5019	25.1744	13.5678	0.612061	0.339212	normal	9.32e-06	1.07082	up	0.53282	0.322388	normal	[I]	Lipid transport and metabolism	Molecular Function: catalytic activity (GO:0003824);; Cellular Component: mitochondrion (GO:0005739);; Biological Process: metabolic process (GO:0008152);;	--	--	[I]	Lipid transport and metabolism	Enoyl-CoA hydratase/isomerase;; Enoyl-CoA hydratase/isomerase	Enoyl-CoA hydratase domain-containing protein 2, mitochondrial OS=Bos taurus OX=9913 GN=ECHDC2 PE=2 SV=1	S	Function unknown	PREDICTED: enoyl-CoA hydratase domain-containing protein 3, mitochondrial isoform X3 [Capra hircus]	molecular function: catalytic activity (GO:0003824);; cellular component: cell (GO:0005623);; cellular component: organelle (GO:0043226);; cellular component: cell part (GO:0044464);; biological process: metabolic process (GO:0008152)
gene-ECHS1	52.6071	50.5825	42.7621	50.2911	78.6266	62.1176	80.3109	49.7706	83.4053	82.7302	67.7054	0.352137	0.417819	normal	0.166834	0.453917	normal	0.0115215	0.63153	up	[I]	Lipid transport and metabolism	Molecular Function: enoyl-CoA hydratase activity (GO:0004300);; Cellular Component: mitochondrial matrix (GO:0005759);; Biological Process: fatty acid beta-oxidation (GO:0006635);; Cellular Component: extracellular exosome (GO:0070062);;	K07511|0|chx:102185243|K07511 enoyl-CoA hydratase [EC:4.2.1.17] | (RefSeq) ECHS1; enoyl-CoA hydratase, short chain 1	Fatty acid elongation (ko00062);; Fatty acid degradation (ko00071);; Valine, leucine and isoleucine degradation (ko00280);; Lysine degradation (ko00310);; Tryptophan metabolism (ko00380);; beta-Alanine metabolism (ko00410);; Propanoate metabolism (ko00640);; Butanoate metabolism (ko00650);; Carbon metabolism (ko01200);; Fatty acid metabolism (ko01212)	[I]	Lipid transport and metabolism	Enoyl-CoA hydratase/isomerase;; Enoyl-CoA hydratase/isomerase	Enoyl-CoA hydratase, mitochondrial OS=Bos taurus OX=9913 GN=ECHS1 PE=2 SV=1	I	Lipid transport and metabolism	PREDICTED: enoyl-CoA hydratase, mitochondrial isoform X2 [Ovis aries musimon]	molecular function: catalytic activity (GO:0003824);; cellular component: cell (GO:0005623);; cellular component: membrane-enclosed lumen (GO:0031974);; cellular component: organelle (GO:0043226);; cellular component: organelle part (GO:0044422);; cellular component: cell part (GO:0044464);; biological process: metabolic process (GO:0008152);; biological process: cellular process (GO:0009987);; b…
gene-ECI1	50.26	35.5416	38.2192	43.0182	126.922	36.961	132.708	27.4512	59.1344	84.1445	88.4188	0.140825	0.710717	normal	0.491407	0.434092	normal	0.0124289	0.774248	up	[I]	Lipid transport and metabolism	Molecular Function: dodecenoyl-CoA delta-isomerase activity (GO:0004165);; Cellular Component: mitochondrial inner membrane (GO:0005743);; Biological Process: fatty acid beta-oxidation (GO:0006635);; Cellular Component: extracellular exosome (GO:0070062);;	K13238|0|oas:101115592|K13238 3,2-trans-enoyl-CoA isomerase, mitochondrial [EC:5.3.3.8] | (RefSeq) ECI1; enoyl-CoA delta isomerase 1	Fatty acid degradation (ko00071)	[I]	Lipid transport and metabolism	Enoyl-CoA hydratase/isomerase;; Enoyl-CoA hydratase/isomerase	Trifunctional enzyme subunit alpha, mitochondrial OS=Sus scrofa OX=9823 GN=HADHA PE=1 SV=1	I	Lipid transport and metabolism	PREDICTED: enoyl-CoA delta isomerase 1, mitochondrial [Ovis aries]	molecular function: catalytic activity (GO:0003824);; cellular component: cell (GO:0005623);; cellular component: membrane (GO:0016020);; cellular component: organelle (GO:0043226);; cellular component: organelle part (GO:0044422);; cellular component: cell part (GO:0044464);; biological process: metabolic process (GO:0008152);; biological process: cellular process (GO:0009987);; biological proce…
gene-ENAM	0.231495	0.131066	0.235002	0.201991	0.022101	0.488599	1.35378	0.529596	0.436243	0.095366	0.516854	0.862319	-0.153065	normal	0.00103675	1.17511	up	0.606392	0.321662	normal	--	--	Biological Process: amelogenesis (GO:0097186);;	--	--	--	--	Enamelin	Enamelin OS=Sus scrofa OX=9823 GN=ENAM PE=1 SV=1	S	Function unknown	PREDICTED: enamelin [Ovis aries]	biological process: multicellular organismal process (GO:0032501);; biological process: developmental process (GO:0032502);; biological process: single-organism process (GO:0044699)
gene-ESRRA	39.6688	43.5708	41.1916	63.4269	67.1952	42.8709	63.8535	46.3037	84.8749	55.4621	55.9385	0.00711252	0.619152	up	0.29484	0.326337	normal	0.0985873	0.536111	normal	--	--	Biological Process: negative regulation of transcription from RNA polymerase II promoter (GO:0000122);; Molecular Function: RNA polymerase II core promoter proximal region sequence-specific DNA binding (GO:0000978);; Molecular Function: transcriptional activator activity, RNA polymerase II core promoter proximal region sequence-specific binding (GO:0001077);; Molecular Function: transcriptional r…	K08552|0|chx:102182570|K08552 estrogen-related receptor alpha | (RefSeq) ESRRA; estrogen related receptor alpha	--	[T]	Signal transduction mechanisms	Zinc finger, C4 type (two domains);; Ligand-binding domain of nuclear hormone receptor	Steroid hormone receptor ERR1 OS=Canis lupus familiaris OX=9615 GN=ESRRA PE=2 SV=1	K	Transcription	PREDICTED: steroid hormone receptor ERR1 isoform X2 [Ovis aries musimon]	biological process: biological regulation (GO:0065007);; molecular function: binding (GO:0005488);; molecular function: nucleic acid binding transcription factor activity (GO:0001071);; biological process: metabolic process (GO:0008152);; biological process: cellular process (GO:0009987);; molecular function: signal transducer activity (GO:0004871);; molecular function: molecular transducer activ…
gene-EVA1C	0.884679	0.636834	0.973519	0.68868	0.809238	1.22605	1.50698	1.71394	0.792286	1.21051	0.702886	0.978959	0.0348075	normal	0.0468064	0.757738	up	0.858617	0.148623	normal	--	--	Cellular Component: integral component of membrane (GO:0016021);; Molecular Function: carbohydrate binding (GO:0030246);;	--	--	[R]	General function prediction only	FAM176 family;; Galactose binding lectin domain	Protein eva-1 homolog C OS=Pan troglodytes OX=9598 GN=EVA1C PE=3 SV=1	S	Function unknown	PREDICTED: protein eva-1 homolog C isoform X2 [Ovis aries musimon]	cellular component: membrane (GO:0016020);; cellular component: membrane part (GO:0044425);; molecular function: binding (GO:0005488)
gene-FABP3	301.998	358.454	436.827	743.434	846.031	206.369	909.38	178.737	722.271	611.845	947.943	1.27e-06	1.06707	up	0.926059	0.0988842	normal	0.000964661	0.902573	up	--	--	Molecular Function: transporter activity (GO:0005215);; Cellular Component: extracellular space (GO:0005615);; Cellular Component: mitochondrial matrix (GO:0005759);; Biological Process: transport (GO:0006810);; Molecular Function: cytoskeletal protein binding (GO:0008092);; Biological Process: regulation of inflammatory response (GO:0050727);; Cellular Component: extracellular exosome (GO:007006…	K08752|7.93838e-90|chx:100860846|K08752 fatty acid-binding protein 3, muscle and heart | (RefSeq) FABP3, H-FABP; fatty acid binding protein 3	PPAR signaling pathway (ko03320)	[I]	Lipid transport and metabolism	Lipocalin / cytosolic fatty-acid binding protein family;; Lipocalin / cytosolic fatty-acid binding protein family	Fatty acid-binding protein, heart OS=Bos taurus OX=9913 GN=FABP3 PE=1 SV=2	I	Lipid transport and metabolism	fatty acid-binding protein, heart [Capra hircus]	molecular function: transporter activity (GO:0005215);; cellular component: extracellular region (GO:0005576);; cellular component: extracellular region part (GO:0044421);; cellular component: cell (GO:0005623);; cellular component: membrane-enclosed lumen (GO:0031974);; cellular component: organelle (GO:0043226);; cellular component: organelle part (GO:0044422);; cellular component: cell part (G…
gene-FAH	2.12062	1.60812	1.45226	1.53309	2.23647	7.82839	4.33948	4.20055	1.38466	3.01183	1.51	0.890847	0.143185	normal	0.000220307	1.21376	up	0.86793	0.139695	normal	[Q]	Secondary metabolites biosynthesis, transport and catabolism	Molecular Function: DNA binding (GO:0003677);; Molecular Function: fumarylacetoacetase activity (GO:0004334);; Biological Process: arginine catabolic process (GO:0006527);; Biological Process: L-phenylalanine catabolic process (GO:0006559);; Biological Process: tyrosine catabolic process (GO:0006572);; Molecular Function: zinc ion binding (GO:0008270);; Cellular Component: extracellular exosome (…	K01555|0|chx:102173786|K01555 fumarylacetoacetase [EC:3.7.1.2] | (RefSeq) FAH; fumarylacetoacetate hydrolase	Tyrosine metabolism (ko00350)	[G]	Carbohydrate transport and metabolism	Fumarylacetoacetate (FAA) hydrolase family;; Fumarylacetoacetase N-terminal	Fumarylacetoacetase OS=Bos taurus OX=9913 GN=FAH PE=2 SV=1	Q	Secondary metabolites biosynthesis, transport and catabolism	Fumarylacetoacetase, partial [Bos mutus]	molecular function: binding (GO:0005488);; molecular function: catalytic activity (GO:0003824);; biological process: metabolic process (GO:0008152);; biological process: cellular process (GO:0009987);; biological process: single-organism process (GO:0044699);; cellular component: extracellular region (GO:0005576);; cellular component: organelle (GO:0043226);; cellular component: extracellular reg…
gene-FAM118A	1.46667	0.987411	1.52398	2.4354	2.84366	2.05807	2.43785	2.56551	1.32186	1.35744	1.28307	0.0192365	0.830149	up	0.0165027	0.776329	up	0.969712	0.0340321	normal	[T]	Signal transduction mechanisms	--	--	--	--	--	SIR2-like domain	Protein FAM118B OS=Bos taurus OX=9913 GN=FAM118B PE=2 SV=1	S	Function unknown	PREDICTED: protein FAM118A isoform X2 [Ovis aries]	--
gene-FAM151A	1.0136	0.755544	1.95051	1.41676	1.59474	1.75974	6.52682	2.17216	3.79326	2.94067	8.03151	0.80255	0.227611	normal	0.0518865	0.84282	normal	0.00252913	1.10445	up	--	--	Cellular Component: integral component of membrane (GO:0016021);; Cellular Component: extracellular exosome (GO:0070062);;	--	--	[S]	Function unknown	Uncharacterized conserved protein (DUF2181)	Protein FAM151A OS=Pongo abelii OX=9601 GN=FAM151A PE=2 SV=1	S	Function unknown	PREDICTED: protein FAM151A-like isoform X2 [Ovis aries musimon]	cellular component: membrane (GO:0016020);; cellular component: membrane part (GO:0044425);; cellular component: extracellular region (GO:0005576);; cellular component: organelle (GO:0043226);; cellular component: extracellular region part (GO:0044421)
gene-FGGY	2.85246	3.10605	3.83721	3.34724	3.67803	5.2512	8.54084	5.36667	2.32189	4.74901	7.05973	0.815042	0.176602	normal	0.000741431	0.903764	up	0.540361	0.365741	normal	[G]	Carbohydrate transport and metabolism	Cellular Component: cytoplasm (GO:0005737);; Biological Process: carbohydrate metabolic process (GO:0005975);; Biological Process: phosphorylation (GO:0016310);; Molecular Function: phosphotransferase activity, alcohol group as acceptor (GO:0016773);; Biological Process: neuron cellular homeostasis (GO:0070050);;	--	--	[G]	Carbohydrate transport and metabolism	FGGY family of carbohydrate kinases, C-terminal domain;; FGGY family of carbohydrate kinases, N-terminal domain	Glycerol kinase OS=Bos taurus OX=9913 GN=GK PE=2 SV=1	G	Carbohydrate transport and metabolism	PREDICTED: FGGY carbohydrate kinase domain-containing protein isoform X1 [Ovis aries musimon]	cellular component: cell (GO:0005623);; cellular component: cell part (GO:0044464);; biological process: metabolic process (GO:0008152);; biological process: cellular process (GO:0009987);; molecular function: catalytic activity (GO:0003824);; biological process: single-organism process (GO:0044699);; biological process: biological regulation (GO:0065007)
gene-FOSL2	7.95574	3.84719	13.0118	17.545	13.4734	16.1837	19.1164	22.5639	5.2188	8.68059	13.3848	0.226114	0.634968	normal	0.00761876	0.95548	up	0.874935	0.132602	normal	--	--	Molecular Function: RNA polymerase II core promoter proximal region sequence-specific DNA binding (GO:0000978);; Molecular Function: transcription factor activity, RNA polymerase II core promoter proximal region sequence-specific binding (GO:0000982);; Biological Process: keratinocyte development (GO:0003334);; Molecular Function: chromatin binding (GO:0003682);; Cellular Component: nucleoplasm (…	K09030|1.53611e-113|phd:102322830|K09030 fos-like antigen 2 | (RefSeq) FOSL2; FOS like 2, AP-1 transcription factor subunit	Osteoclast differentiation (ko04380)	[K]	Transcription	bZIP transcription factor;; Basic region leucine zipper;; bZIP Maf transcription factor	Proto-oncogene c-Fos OS=Felis catus OX=9685 GN=FOS PE=2 SV=1	K	Transcription	fos-related antigen 2 isoform X1 [Odocoileus virginianus texanus]	molecular function: binding (GO:0005488);; molecular function: nucleic acid binding transcription factor activity (GO:0001071);; biological process: biological regulation (GO:0065007);; biological process: cellular process (GO:0009987);; biological process: developmental process (GO:0032502);; biological process: single-organism process (GO:0044699);; cellular component: cell (GO:0005623);; cellu…
gene-GADD45G	5.32492	3.52164	11.4338	12.3691	29.0799	13.8824	47.9995	22.662	9.14626	9.77351	16.2281	0.0315814	0.915417	up	0.000237145	1.2659	up	0.307965	0.524205	normal	--	--	Biological Process: activation of MAPKKK activity (GO:0000185);; Cellular Component: nucleus (GO:0005634);; Cellular Component: cytoplasm (GO:0005737);; Biological Process: multicellular organism development (GO:0007275);; Biological Process: cell differentiation (GO:0030154);; Biological Process: positive regulation of apoptotic process (GO:0043065);; Biological Process: positive regulation of J…	K04402|4.73072e-106|phd:102343412|K04402 growth arrest and DNA-damage-inducible protein | (RefSeq) GADD45G; growth arrest and DNA damage inducible gamma	MAPK signaling pathway (ko04010);; FoxO signaling pathway (ko04068);; Cell cycle (ko04110);; p53 signaling pathway (ko04115);; Apoptosis (ko04210)	--	--	Ribosomal protein L7Ae/L30e/S12e/Gadd45 family	Growth arrest and DNA damage-inducible protein GADD45 gamma OS=Bos taurus OX=9913 GN=GADD45G PE=2 SV=1	O	Posttranslational modification, protein turnover, chaperones	PREDICTED: growth arrest and DNA damage-inducible protein GADD45 gamma [Pantholops hodgsonii]	biological process: biological regulation (GO:0065007);; cellular component: cell (GO:0005623);; cellular component: organelle (GO:0043226);; cellular component: cell part (GO:0044464);; biological process: multicellular organismal process (GO:0032501);; biological process: developmental process (GO:0032502);; biological process: single-organism process (GO:0044699);; biological process: cellular…
gene-GDNF	0.244535	0.455189	0.284027	0.293953	0.266705	0.655569	0.597309	2.04995	0.471737	0.127691	0.408121	0.960299	-0.0594523	normal	0.0488797	0.849931	up	0.987402	0.0180191	normal	--	--	Biological Process: neural crest cell migration (GO:0001755);; Biological Process: organ induction (GO:0001759);; Biological Process: postsynaptic membrane organization (GO:0001941);; Cellular Component: extracellular region (GO:0005576);; Molecular Function: growth factor activity (GO:0008083);; Biological Process: positive regulation of cell proliferation (GO:0008284);; Biological Process: post…	K05452|1.34821e-118|pps:100969352|K05452 glial cell derived neurotrophic factor | (RefSeq) GDNF; glial cell derived neurotrophic factor	--	--	--	Transforming growth factor beta like domain	--	S	Function unknown	Glial cell line-derived neurotrophic factor, partial [Bos mutus]	biological process: cellular process (GO:0009987);; biological process: locomotion (GO:0040011);; biological process: single-organism process (GO:0044699);; biological process: localization (GO:0051179);; biological process: developmental process (GO:0032502);; biological process: biological regulation (GO:0065007);; biological process: cellular component organization or biogenesis (GO:0071840);;…
gene-GOT1	97.3782	89.5338	68.9454	122.153	186.29	70.78	264.71	99.2981	227.678	146.531	181.56	0.0192365	0.767957	up	0.286376	0.554731	normal	0.000128801	0.957811	up	[E]	Amino acid transport and metabolism	Molecular Function: L-aspartate:2-oxoglutarate aminotransferase activity (GO:0004069);; Molecular Function: phosphatidylserine decarboxylase activity (GO:0004609);; Cellular Component: nucleus (GO:0005634);; Cellular Component: mitochondrion (GO:0005739);; Cellular Component: cytosol (GO:0005829);; Biological Process: oxaloacetate metabolic process (GO:0006107);; Biological Process: glycerol bios…	K14454|0|oas:101118747|K14454 aspartate aminotransferase, cytoplasmic [EC:2.6.1.1] | (RefSeq) GOT1; glutamic-oxaloacetic transaminase 1	Arginine biosynthesis (ko00220);; Alanine, aspartate and glutamate metabolism (ko00250);; Cysteine and methionine metabolism (ko00270);; Arginine and proline metabolism (ko00330);; Tyrosine metabolism (ko00350);; Phenylalanine metabolism (ko00360);; Phenylalanine, tyrosine and tryptophan biosynthesis (ko00400);; Carbon metabolism (ko01200);; 2-Oxocarboxylic acid metabolism (ko01210);; Biosynthesi…	[E]	Amino acid transport and metabolism	Aminotransferase class I and II	Aspartate aminotransferase, cytoplasmic OS=Bos taurus OX=9913 GN=GOT1 PE=1 SV=3	E	Amino acid transport and metabolism	Aspartate aminotransferase, cytoplasmic, partial [Bos mutus]	molecular function: catalytic activity (GO:0003824);; cellular component: cell (GO:0005623);; cellular component: organelle (GO:0043226);; cellular component: cell part (GO:0044464);; biological process: metabolic process (GO:0008152);; biological process: cellular process (GO:0009987);; biological process: single-organism process (GO:0044699);; biological process: signaling (GO:0023052);; biolog…
gene-GPD2	14.4866	14.7406	16.1191	14.6204	7.19275	26.7937	17.2523	37.6729	7.25575	12.6139	13.5843	0.629121	-0.315724	normal	0.0432326	0.744367	up	0.585846	-0.296689	normal	[C]	Energy production and conversion	Molecular Function: calcium ion binding (GO:0005509);; Cellular Component: mitochondrial inner membrane (GO:0005743);; Biological Process: glycerol-3-phosphate metabolic process (GO:0006072);; Biological Process: gluconeogenesis (GO:0006094);; Cellular Component: glycerol-3-phosphate dehydrogenase complex (GO:0009331);; Biological Process: glycerol catabolic process (GO:0019563);; Biological Proc…	K00111|0|oas:443090|K00111 glycerol-3-phosphate dehydrogenase [EC:1.1.5.3] | (RefSeq) GPD2; glycerol-3-phosphate dehydrogenase 2	Glycerophospholipid metabolism (ko00564)	[C]	Energy production and conversion	FAD dependent oxidoreductase;; C-terminal domain of alpha-glycerophosphate oxidase;; EF-hand domain pair;; EF hand;; FAD binding domain;; EF-hand domain;; Glucose inhibited division protein A	Glycerol-3-phosphate dehydrogenase, mitochondrial OS=Bos taurus OX=9913 GN=GPD2 PE=2 SV=1	C	Energy production and conversion	PREDICTED: glycerol-3-phosphate dehydrogenase, mitochondrial isoform X1 [Ovis aries]	molecular function: binding (GO:0005488);; cellular component: cell (GO:0005623);; cellular component: membrane (GO:0016020);; cellular component: organelle (GO:0043226);; cellular component: organelle part (GO:0044422);; cellular component: cell part (GO:0044464);; biological process: metabolic process (GO:0008152);; biological process: cellular process (GO:0009987);; biological process: single-…
gene-GRPEL1	16.5569	18.5777	17.5755	18.7323	28.1707	14.4137	28.26	16.5824	36.9706	24.2877	26.158	0.317153	0.432534	normal	0.674425	0.228238	normal	0.025882	0.647531	up	[O]	Posttranslational modification, protein turnover, chaperones	Molecular Function: adenyl-nucleotide exchange factor activity (GO:0000774);; Cellular Component: nucleus (GO:0005634);; Cellular Component: mitochondrial matrix (GO:0005759);; Biological Process: protein folding (GO:0006457);; Molecular Function: protein homodimerization activity (GO:0042803);; Biological Process: regulation of catalytic activity (GO:0050790);; Molecular Function: unfolded prote…	K03687|8.23876e-141|oas:100037672|K03687 molecular chaperone GrpE | (RefSeq) GRPEL1; GrpE like 1, mitochondrial	--	[O]	Posttranslational modification, protein turnover, chaperones	GrpE	GrpE protein homolog 1, mitochondrial OS=Bos taurus OX=9913 GN=GRPEL1 PE=1 SV=1	O	Posttranslational modification, protein turnover, chaperones	PREDICTED: grpE protein homolog 1, mitochondrial [Ovis aries]	molecular function: binding (GO:0005488);; molecular function: molecular function regulator (GO:0098772);; biological process: biological regulation (GO:0065007);; cellular component: cell (GO:0005623);; cellular component: organelle (GO:0043226);; cellular component: cell part (GO:0044464);; cellular component: membrane-enclosed lumen (GO:0031974);; cellular component: organelle part (GO:0044422…
gene-IFRD1	9.10307	7.11821	9.0624	9.60273	6.18241	8.99729	19.2361	13.4426	22.7825	6.74516	16.1335	0.981352	0.0249611	normal	0.0191961	0.698756	up	0.213965	0.588189	normal	--	--	Cellular Component: nucleus (GO:0005634);; Cellular Component: cytoplasm (GO:0005737);; Biological Process: striated muscle tissue development (GO:0014706);; Biological Process: negative regulation of axon extension (GO:0030517);; Biological Process: muscle cell differentiation (GO:0042692);; Biological Process: skeletal muscle tissue regeneration (GO:0043403);; Biological Process: negative regul…	--	--	[Z]	Cytoskeleton	Interferon-related developmental regulator (IFRD);; Interferon-related protein conserved region	Interferon-related developmental regulator 1 OS=Sus scrofa OX=9823 GN=IFRD1 PE=2 SV=1	K	Transcription	PREDICTED: interferon-related developmental regulator 1 isoform X2 [Ovis aries musimon]	cellular component: cell (GO:0005623);; cellular component: organelle (GO:0043226);; cellular component: cell part (GO:0044464);; biological process: developmental process (GO:0032502);; biological process: cellular process (GO:0009987);; biological process: multicellular organismal process (GO:0032501);; biological process: single-organism process (GO:0044699);; biological process: biological re…
gene-IGFN1	109.106	92.6126	84.6547	242.321	208.284	142.984	158.928	104.514	165.153	107.655	134.935	2.95e-09	1.18952	up	0.0543186	0.556753	normal	0.168246	0.466722	normal	[X]	Mobilome: prophages, transposons	Cellular Component: nucleus (GO:0005634);; Cellular Component: Z disc (GO:0030018);;	--	--	[Z]	Cytoskeleton	Immunoglobulin I-set domain;; Immunoglobulin domain;; Fibronectin type III domain;; Immunoglobulin domain;; Immunoglobulin domain;; Immunoglobulin V-set domain;; CD80-like C2-set immunoglobulin domain	Myosin light chain kinase, smooth muscle OS=Oryctolagus cuniculus OX=9986 GN=MYLK PE=1 SV=2	S	Function unknown	immunoglobulin-like and fibronectin type III domain-containing protein 1 [Odocoileus virginianus texanus]	cellular component: cell (GO:0005623);; cellular component: organelle (GO:0043226);; cellular component: cell part (GO:0044464);; cellular component: organelle part (GO:0044422);; cellular component: supramolecular complex (GO:0099080)
gene-IPO4	3.56184	3.12393	3.48106	3.71548	3.97328	5.74432	6.69696	4.38927	4.89277	4.42935	6.16963	0.497841	0.267902	normal	0.00147013	0.755394	up	0.103471	0.55018	normal	--	--	Biological Process: obsolete protein import into nucleus, docking (GO:0000059);; Biological Process: protein import into nucleus, translocation (GO:0000060);; Cellular Component: nuclear chromatin (GO:0000790);; Cellular Component: cytoplasm (GO:0005737);; Biological Process: DNA replication-dependent nucleosome assembly (GO:0006335);; Biological Process: DNA replication-independent nucleosome as…	K20221|0|bta:510372|K20221 importin-4 | (RefSeq) IPO4; importin 4	--	[YU]	Nuclear structure;; Intracellular trafficking, secretion, and vesicular transport	HEAT-like repeat;; HEAT repeats;; HEAT repeat;; Importin-beta N-terminal domain;; UME (NUC010) domain;; Vacuolar 14 Fab1-binding region;; rRNA processing/ribosome biogenesis;; Interferon-related developmental regulator (IFRD)	--	U	Intracellular trafficking, secretion, and vesicular transport	PREDICTED: importin-4 isoform X3 [Ovis aries musimon]	biological process: localization (GO:0051179);; cellular component: cell (GO:0005623);; cellular component: membrane-enclosed lumen (GO:0031974);; cellular component: organelle (GO:0043226);; cellular component: organelle part (GO:0044422);; cellular component: cell part (GO:0044464);; biological process: cellular process (GO:0009987);; biological process: cellular component organization or bioge…
gene-IRS2	6.30016	3.92696	6.56187	7.44201	3.75702	8.93649	10.8828	9.97537	3.97463	4.74516	7.28746	0.931589	0.0934444	normal	0.000457642	0.844196	up	0.999031	-0.00149947	normal	--	--	Biological Process: positive regulation of mesenchymal cell proliferation (GO:0002053);; Biological Process: negative regulation of B cell apoptotic process (GO:0002903);; Molecular Function: signal transducer activity (GO:0004871);; Molecular Function: insulin receptor binding (GO:0005158);; Cellular Component: cytosol (GO:0005829);; Cellular Component: plasma membrane (GO:0005886);; Biological …	K07187|0|bta:100300012|K07187 insulin receptor substrate 2 | (RefSeq) IRS2; insulin receptor substrate 2	cGMP-PKG signaling pathway (ko04022);; FoxO signaling pathway (ko04068);; AMPK signaling pathway (ko04152);; Longevity regulating pathway (ko04211);; Longevity regulating pathway - multiple species (ko04213);; Insulin signaling pathway (ko04910);; Adipocytokine signaling pathway (ko04920);; Regulation of lipolysis in adipocytes (ko04923);; Type II diabetes mellitus (ko04930);; Insulin resistance …	--	--	PTB domain (IRS-1 type);; PH domain	Insulin receptor substrate 1 OS=Chlorocebus aethiops OX=9534 GN=IRS1 PE=2 SV=1	T	Signal transduction mechanisms	PREDICTED: insulin receptor substrate 2-like [Ovis aries musimon]	biological process: biological regulation (GO:0065007);; molecular function: signal transducer activity (GO:0004871);; molecular function: binding (GO:0005488);; cellular component: cell (GO:0005623);; cellular component: cell part (GO:0044464);; cellular component: membrane (GO:0016020);; biological process: multicellular organismal process (GO:0032501);; biological process: developmental proces…
gene-ITPRIP	4.76022	3.27633	4.30716	6.36847	5.57143	5.29543	6.62882	7.11536	3.64763	4.18715	4.48381	0.120738	0.564656	normal	0.0239031	0.653712	up	0.99466	0.00442836	normal	--	--	Cellular Component: plasma membrane (GO:0005886);;	--	--	--	--	Mab-21 protein	Inositol 1,4,5-trisphosphate receptor-interacting protein OS=Bos taurus OX=9913 GN=ITPRIP PE=2 SV=1	S	Function unknown	PREDICTED: inositol 1,4,5-trisphosphate receptor-interacting protein isoform X1 [Ovis aries musimon]	cellular component: cell (GO:0005623);; cellular component: membrane (GO:0016020);; cellular component: cell part (GO:0044464)
gene-KIAA0408	8.82438	8.25191	9.46599	14.1607	9.30353	18.0541	12.5256	26.1952	6.42669	8.80921	10.22	0.343568	0.429822	normal	0.00332837	0.951373	up	0.994817	-0.00466027	normal	--	--	--	--	--	--	--	Domain of unknown function (DUF4482)	--	S	Function unknown	PREDICTED: uncharacterized protein KIAA0408 homolog [Ovis aries]	--
gene-LMCD1	71.8815	67.3301	65.3458	96.4603	93.6675	38.5275	244.383	64.7788	282.261	80.2723	168.844	0.00781155	0.549007	normal	0.713515	0.274911	normal	0.0104329	0.935163	up	--	--	Biological Process: negative regulation of transcription from RNA polymerase II promoter (GO:0000122);; Biological Process: positive regulation of defense response to virus by host (GO:0002230);; Molecular Function: transcription corepressor activity (GO:0003714);; Cellular Component: extracellular space (GO:0005615);; Cellular Component: nucleus (GO:0005634);; Cellular Component: cytoplasm (GO:0…	--	--	[TZR]	Signal transduction mechanisms;; Cytoskeleton;; General function prediction only	PET Domain;; LIM domain	LIM and cysteine-rich domains protein 1 OS=Bos taurus OX=9913 GN=LMCD1 PE=2 SV=1	K	Transcription	PREDICTED: LIM and cysteine-rich domains protein 1 [Ovis aries musimon]	biological process: biological regulation (GO:0065007);; molecular function: transcription factor activity, protein binding (GO:0000988);; cellular component: extracellular region (GO:0005576);; cellular component: extracellular region part (GO:0044421);; cellular component: cell (GO:0005623);; cellular component: organelle (GO:0043226);; cellular component: cell part (GO:0044464);; molecular fun…
gene-LOC101103178	0.239493	0.480493	0.947887	0.223866	0.149932	2.60961	1.52959	1.01971	0.169962	2.38832	0.207365	0.575797	-0.382622	normal	0.000609298	1.22306	up	0.579209	0.301496	normal	--	--	Cellular Component: nucleoplasm (GO:0005654);; Biological Process: mRNA processing (GO:0006397);; Molecular Function: zinc ion binding (GO:0008270);; Biological Process: RNA splicing (GO:0008380);; Molecular Function: RNA binding (GO:0044822);;	--	--	[R]	General function prediction only	Zn-finger in Ran binding protein and others	Zinc finger Ran-binding domain-containing protein 2 OS=Pongo abelii OX=9601 GN=ZRANB2 PE=2 SV=1	S	Function unknown	PREDICTED: LOW QUALITY PROTEIN: zinc finger Ran-binding domain-containing protein 2-like [Echinops telfairi]	cellular component: cell (GO:0005623);; cellular component: organelle (GO:0043226);; cellular component: organelle part (GO:0044422);; cellular component: cell part (GO:0044464);; biological process: metabolic process (GO:0008152);; biological process: cellular process (GO:0009987);; molecular function: binding (GO:0005488)
gene-LOC101103232	193.473	126.204	203.584	106.973	78.2011	241.762	302.934	319.754	117.738	236.077	165.176	0.109093	-0.622011	normal	0.0032309	0.753468	up	0.963959	0.0390182	normal	--	--	Biological Process: cytoplasmic translation (GO:0002181);; Molecular Function: structural constituent of ribosome (GO:0003735);; Cellular Component: nucleolus (GO:0005730);; Cellular Component: membrane (GO:0016020);; Cellular Component: cytosolic large ribosomal subunit (GO:0022625);; Molecular Function: RNA binding (GO:0044822);;	K02920|3.07091e-60|oas:101103232|K02920 large subunit ribosomal protein L36e | (RefSeq) 60S ribosomal protein L36	Ribosome (ko03010)	[J]	Translation, ribosomal structure and biogenesis	Ribosomal protein L36e	60S ribosomal protein L36 OS=Bos taurus OX=9913 GN=RPL36 PE=3 SV=3	J	Translation, ribosomal structure and biogenesis	PREDICTED: 60S ribosomal protein L36 [Ovis aries]	biological process: metabolic process (GO:0008152);; biological process: cellular process (GO:0009987);; molecular function: structural molecule activity (GO:0005198);; cellular component: cell (GO:0005623);; cellular component: organelle (GO:0043226);; cellular component: organelle part (GO:0044422);; cellular component: cell part (GO:0044464);; cellular component: membrane (GO:0016020);; cellul…
gene-LOC101104407	2.47104	1.64287	2.01035	4.84958	3.71952	0.882586	6.99473	2.06343	6.83399	3.26359	7.09003	0.00656199	0.905744	up	0.613297	0.355495	normal	0.00154495	1.05155	up	[T]	Signal transduction mechanisms	Biological Process: acyl-CoA metabolic process (GO:0006637);; Molecular Function: thiolester hydrolase activity (GO:0016790);;	K01068|0|oas:101104407|K01068 acyl-coenzyme A thioesterase 1/2/4 [EC:3.1.2.2] | (RefSeq) acyl-coenzyme A thioesterase 1-like	Fatty acid elongation (ko00062);; Biosynthesis of unsaturated fatty acids (ko01040)	--	--	BAAT / Acyl-CoA thioester hydrolase C terminal;; Acyl-CoA thioester hydrolase/BAAT N-terminal region;; Dienelactone hydrolase family;; Serine hydrolase (FSH1)	--	S	Function unknown	PREDICTED: acyl-coenzyme A thioesterase 1-like [Ovis aries musimon]	biological process: metabolic process (GO:0008152);; biological process: cellular process (GO:0009987);; molecular function: catalytic activity (GO:0003824)
gene-LOC101104866	2.64702	2.73486	2.97519	4.5937	4.21652	3.4174	6.10082	2.19633	3.73662	2.51116	2.01771	0.00653947	0.686099	up	0.417292	0.436335	normal	0.992681	0.00824552	normal	--	--	Biological Process: antigen processing and presentation of peptide antigen via MHC class I (GO:0002474);; Biological Process: immune response (GO:0006955);; Cellular Component: integral component of membrane (GO:0016021);; Molecular Function: peptide antigen binding (GO:0042605);; Cellular Component: MHC class I protein complex (GO:0042612);;	K06751|0|bom:102286220|K06751 major histocompatibility complex, class I | (RefSeq) BOLA class I histocompatibility antigen, alpha chain BL3-6	Endocytosis (ko04144);; Phagosome (ko04145);; Cell adhesion molecules (CAMs) (ko04514);; Antigen processing and presentation (ko04612);; Type I diabetes mellitus (ko04940);; HTLV-I infection (ko05166);; Herpes simplex infection (ko05168);; Epstein-Barr virus infection (ko05169);; Viral carcinogenesis (ko05203);; Autoimmune thyroid disease (ko05320);; Allograft rejection (ko05330);; Graft-versus-h…	--	--	Class I Histocompatibility antigen, domains alpha 1 and 2;; Immunoglobulin C1-set domain;; CD80-like C2-set immunoglobulin domain	BOLA class I histocompatibility antigen, alpha chain BL3-6 OS=Bos taurus OX=9913 PE=2 SV=1	U	Intracellular trafficking, secretion, and vesicular transport	PREDICTED: BOLA class I histocompatibility antigen, alpha chain BL3-7 isoform X2 [Capra hircus]	biological process: immune system process (GO:0002376);; biological process: response to stimulus (GO:0050896);; cellular component: membrane (GO:0016020);; cellular component: membrane part (GO:0044425);; molecular function: binding (GO:0005488);; cellular component: cell (GO:0005623);; cellular component: macromolecular complex (GO:0032991);; cellular component: cell part (GO:0044464)
gene-LOC101110434	0.073778	0.485735	0.354426	0.196706	5.50738	0.284801	0.387782	1.1864	1.60531	1.36865	1.53231	--	--	--	--	--	--	0.0297894	0.895926	up	[Q]	Secondary metabolites biosynthesis, transport and catabolism	Molecular Function: oxidoreductase activity (GO:0016491);; Biological Process: oxidation-reduction process (GO:0055114);;	K04119|0|oas:101110434|K04119 aldo-keto reductase family 1 member C3 [EC:1.1.1.51 1.1.1.188 1.1.1.213 1.1.1.357] | (RefSeq) dihydrodiol dehydrogenase 3-like	Steroid hormone biosynthesis (ko00140);; Arachidonic acid metabolism (ko00590);; Ovarian steroidogenesis (ko04913)	[R]	General function prediction only	Aldo/keto reductase family	Dihydrodiol dehydrogenase 3 OS=Bos taurus OX=9913 PE=2 SV=1	S	Function unknown	PREDICTED: dihydrodiol dehydrogenase 3-like isoform X1 [Ovis aries]	molecular function: catalytic activity (GO:0003824);; biological process: metabolic process (GO:0008152);; biological process: single-organism process (GO:0044699)
gene-LOC101110647	22.0934	22.0329	36.0827	25.7071	34.7551	53.0164	14.1817	140.942	65.0201	32.5761	84.9573	0.747726	0.229023	normal	0.492695	0.384573	normal	0.0334122	0.839919	up	[J]	Translation, ribosomal structure and biogenesis	Biological Process: maturation of LSU-rRNA from tricistronic rRNA transcript (SSU-rRNA, 5.8S rRNA, LSU-rRNA) (GO:0000463);; Biological Process: cytoplasmic translation (GO:0002181);; Molecular Function: structural constituent of ribosome (GO:0003735);; Cellular Component: cytosolic large ribosomal subunit (GO:0022625);; Molecular Function: RNA binding (GO:0044822);;	K02937|3.23384e-156|nle:100593115|K02937 large subunit ribosomal protein L7e | (RefSeq) RPL7; ribosomal protein L7	Ribosome (ko03010)	[J]	Translation, ribosomal structure and biogenesis	Ribosomal L30 N-terminal domain;; Ribosomal protein L30p/L7e	60S ribosomal protein L7 OS=Bos taurus OX=9913 GN=RPL7 PE=2 SV=1	J	Translation, ribosomal structure and biogenesis	PREDICTED: 60S ribosomal protein L7 [Mustela putorius furo]	biological process: metabolic process (GO:0008152);; biological process: cellular process (GO:0009987);; biological process: cellular component organization or biogenesis (GO:0071840);; molecular function: structural molecule activity (GO:0005198);; cellular component: cell (GO:0005623);; cellular component: macromolecular complex (GO:0032991);; cellular component: organelle (GO:0043226);; cellul…
gene-LOC101114342	16.1097	12.2919	11.3072	15.0221	18.7045	23.2242	18.5537	22.1863	12.3278	17.0483	14.3681	0.406215	0.382312	normal	0.0310683	0.680659	up	0.805496	0.153192	normal	[Q]	Secondary metabolites biosynthesis, transport and catabolism	Biological Process: metabolic process (GO:0008152);; Molecular Function: hydrolase activity (GO:0016787);; Molecular Function: metal ion binding (GO:0046872);;	--	--	[R]	General function prediction only	Fumarylacetoacetate (FAA) hydrolase family	Fumarylacetoacetate hydrolase domain-containing protein 2 OS=Bos taurus OX=9913 GN=FAHD2 PE=2 SV=1	Q	Secondary metabolites biosynthesis, transport and catabolism	PREDICTED: fumarylacetoacetate hydrolase domain-containing protein 2A [Ovis aries]	biological process: metabolic process (GO:0008152);; molecular function: catalytic activity (GO:0003824);; molecular function: binding (GO:0005488)
gene-LOC101118495	0.93998	0.79479	0.846345	2.16373	3.19256	0.438008	3.51628	0.537022	4.04063	1.60813	2.33031	0.000143758	1.21135	up	0.670599	0.30641	normal	0.00571041	1.01041	up	--	--	Cellular Component: integral component of membrane (GO:0016021);; Cellular Component: extracellular exosome (GO:0070062);;	--	--	[S]	Function unknown	Uncharacterized conserved protein (DUF2181)	Protein FAM151A OS=Pongo abelii OX=9601 GN=FAM151A PE=2 SV=1	S	Function unknown	PREDICTED: protein FAM151A isoform X2 [Ovis aries musimon]	cellular component: membrane (GO:0016020);; cellular component: membrane part (GO:0044425);; cellular component: extracellular region (GO:0005576);; cellular component: organelle (GO:0043226);; cellular component: extracellular region part (GO:0044421)
gene-LOC101119869	0.798068	0.473773	0.940119	10.7529	2.1771	1.19238	0.991555	1.83863	1.68856	0.498726	1.95516	0.000346794	1.22723	up	0.339318	0.549646	normal	0.514734	0.389623	normal	[J]	Translation, ribosomal structure and biogenesis	Biological Process: maturation of LSU-rRNA from tricistronic rRNA transcript (SSU-rRNA, 5.8S rRNA, LSU-rRNA) (GO:0000463);; Biological Process: blastocyst formation (GO:0001825);; Biological Process: cytoplasmic translation (GO:0002181);; Molecular Function: structural constituent of ribosome (GO:0003735);; Cellular Component: nucleolus (GO:0005730);; Cellular Component: cytosolic large ribosomal…	--	--	[J]	Translation, ribosomal structure and biogenesis	Ribosomal L30 N-terminal domain;; Ribosomal protein L30p/L7e	60S ribosomal protein L7-like 1 OS=Sus scrofa OX=9823 GN=RPL7L1 PE=3 SV=1	J	Translation, ribosomal structure and biogenesis	PREDICTED: 60S ribosomal protein L7-like 1 [Bison bison bison]	biological process: metabolic process (GO:0008152);; biological process: cellular process (GO:0009987);; biological process: cellular component organization or biogenesis (GO:0071840);; biological process: developmental process (GO:0032502);; biological process: single-organism process (GO:0044699);; molecular function: structural molecule activity (GO:0005198);; cellular component: cell (GO:0005…
gene-LOC105606262	5.00766	4.27989	4.95288	7.31192	9.60877	3.20269	8.03775	6.24326	8.02408	10.11	6.45179	0.00613889	0.792159	up	0.617211	0.304356	normal	0.0571326	0.664682	normal	[IQR]	Lipid transport and metabolism;; Secondary metabolites biosynthesis, transport and catabolism;; General function prediction only	Molecular Function: carbonyl reductase (NADPH) activity (GO:0004090);; Cellular Component: nucleus (GO:0005634);; Cellular Component: mitochondrion (GO:0005739);; Cellular Component: cytoplasmic microtubule (GO:0005881);; Cellular Component: microvillus (GO:0005902);; Cellular Component: brush border (GO:0005903);; Biological Process: xylulose metabolic process (GO:0005997);; Biological Process: …	K03331|2.58205e-134|oas:105606262|K03331 L-xylulose reductase [EC:1.1.1.10] | (RefSeq) L-xylulose reductase-like	Pentose and glucuronate interconversions (ko00040)	[Q]	Secondary metabolites biosynthesis, transport and catabolism	Enoyl-(Acyl carrier protein) reductase;; short chain dehydrogenase	L-xylulose reductase OS=Bos taurus OX=9913 GN=DCXR PE=2 SV=1	S	Function unknown	PREDICTED: L-xylulose reductase-like isoform X2 [Ovis aries musimon]	molecular function: catalytic activity (GO:0003824);; biological process: metabolic process (GO:0008152);; biological process: single-organism process (GO:0044699);; cellular component: cell (GO:0005623);; cellular component: organelle (GO:0043226);; cellular component: cell part (GO:0044464);; cellular component: organelle part (GO:0044422);; cellular component: supramolecular complex (GO:009908…
gene-LOC105615767	2.85974	2.11709	2.06919	4.98964	6.41266	2.43633	1.53037	2.12672	6.26208	0.979865	5.98307	0.00695105	0.969329	up	0.975216	-0.0342194	normal	0.519227	0.387154	normal	--	--	Cellular Component: integral component of membrane (GO:0016021);;	--	--	[R]	General function prediction only	Hypoxia induced protein conserved region	HIG1 domain family member 1A, mitochondrial OS=Pongo abelii OX=9601 GN=HIGD1A PE=3 SV=1	S	Function unknown	PREDICTED: HIG1 domain family member 1A, mitochondrial isoform X1 [Pantholops hodgsonii]	cellular component: membrane (GO:0016020);; cellular component: membrane part (GO:0044425)
gene-LOC114108707	2.89989	3.85359	4.67167	5.62585	4.31699	2.53087	5.91997	3.51169	6.62935	7.80394	8.08122	0.642946	0.325456	normal	0.871146	0.143036	normal	0.0463762	0.7638	up	--	--	Cellular Component: integral component of membrane (GO:0016021);;	--	--	--	--	TMEM141 protein family	Transmembrane protein 141 OS=Bos taurus OX=9913 GN=TMEM141 PE=3 SV=1	S	Function unknown	PREDICTED: transmembrane protein 141 isoform X1 [Ovis aries]	cellular component: membrane (GO:0016020);; cellular component: membrane part (GO:0044425)
gene-LOC114109642	4.23046	3.83643	1.24906	2.73236	4.62776	6.16448	21.3298	6.82834	2.22348	5.63877	4.6353	0.875218	0.166881	normal	0.00958291	1.01399	up	0.743041	0.241551	normal	--	--	Biological Process: antigen processing and presentation of peptide antigen via MHC class I (GO:0002474);; Biological Process: immune response (GO:0006955);; Cellular Component: integral component of membrane (GO:0016021);; Molecular Function: peptide antigen binding (GO:0042605);; Cellular Component: MHC class I protein complex (GO:0042612);;	K06751|6.97084e-179|bta:782684|K06751 major histocompatibility complex, class I | (RefSeq) BOLA-A; major histocompatibility complex, class I, A	Endocytosis (ko04144);; Phagosome (ko04145);; Cell adhesion molecules (CAMs) (ko04514);; Antigen processing and presentation (ko04612);; Type I diabetes mellitus (ko04940);; HTLV-I infection (ko05166);; Herpes simplex infection (ko05168);; Epstein-Barr virus infection (ko05169);; Viral carcinogenesis (ko05203);; Autoimmune thyroid disease (ko05320);; Allograft rejection (ko05330);; Graft-versus-h…	--	--	Class I Histocompatibility antigen, domains alpha 1 and 2;; Immunoglobulin C1-set domain;; CD80-like C2-set immunoglobulin domain	BOLA class I histocompatibility antigen, alpha chain BL3-6 OS=Bos taurus OX=9913 PE=2 SV=1	U	Intracellular trafficking, secretion, and vesicular transport	PREDICTED: BOLA class I histocompatibility antigen, alpha chain BL3-7 isoform X4 [Ovis aries musimon]	biological process: immune system process (GO:0002376);; biological process: response to stimulus (GO:0050896);; cellular component: membrane (GO:0016020);; cellular component: membrane part (GO:0044425);; molecular function: binding (GO:0005488);; cellular component: cell (GO:0005623);; cellular component: macromolecular complex (GO:0032991);; cellular component: cell part (GO:0044464)
gene-LOC114112279	13.3405	11.5613	15.0247	22.3434	23.0109	12.8387	29.7543	37.9103	14.3812	10.675	2.1807	4.59e-06	0.815606	up	0.0250804	0.825009	up	0.815789	-0.17457	normal	--	--	--	--	--	--	--	Immunoglobulin I-set domain;; Immunoglobulin domain;; Immunoglobulin domain;; Immunoglobulin domain;; Immunoglobulin V-set domain;; Ig-like domain on T-cell surface glycoprotein CD3 epsilon chain;; T-cell surface glycoprotein CD3 delta chain;; Izumo-like Immunoglobulin domain;; Multiubiquitin;; Ribosome recycling factor;; Actin-binding domain of plant-specific actin-binding protein;; NTF2 fold im…	Sialoadhesin OS=Sus scrofa OX=9823 GN=SIGLEC1 PE=1 SV=1	S	Function unknown	PREDICTED: obscurin isoform X34 [Capra hircus]	--
gene-LOC114114041	3.58704	3.60963	3.82475	4.38248	11.3604	7.70417	4.2634	7.14818	9.71829	6.1852	11.0986	0.0991309	0.76089	normal	0.0737077	0.707839	normal	0.000348753	1.03099	up	--	--	Molecular Function: structural constituent of ribosome (GO:0003735);; Cellular Component: mitochondrial inner membrane (GO:0005743);; Cellular Component: mitochondrial small ribosomal subunit (GO:0005763);; Molecular Function: RNA binding (GO:0044822);; Biological Process: mitochondrial translational initiation (GO:0070124);; Biological Process: mitochondrial translational elongation (GO:0070125)…	K17413|4.27838e-73|oas:101109952|K17413 small subunit ribosomal protein S35 | (RefSeq) MRPS35; mitochondrial ribosomal protein S35	--	[J]	Translation, ribosomal structure and biogenesis	Mitochondrial ribosomal subunit protein	28S ribosomal protein S35, mitochondrial OS=Bos taurus OX=9913 GN=MRPS35 PE=1 SV=1	S	Function unknown	PREDICTED: 28S ribosomal protein S35, mitochondrial isoform X1 [Ovis aries]	molecular function: structural molecule activity (GO:0005198);; cellular component: cell (GO:0005623);; cellular component: membrane (GO:0016020);; cellular component: organelle (GO:0043226);; cellular component: organelle part (GO:0044422);; cellular component: cell part (GO:0044464);; cellular component: macromolecular complex (GO:0032991);; biological process: metabolic process (GO:0008152);; …
gene-LOC114115385	2.37645	1.91612	3.86816	9.93961	4.82085	1.21267	11.7665	1.56391	11.216	4.62552	4.8707	0.0123142	0.978644	up	0.77907	0.200908	normal	0.0243359	0.88661	up	[I]	Lipid transport and metabolism	Molecular Function: lipid binding (GO:0008289);; Biological Process: response to cold (GO:0009409);; Cellular Component: extracellular exosome (GO:0070062);;	K12417|0|phd:102325042|K12417 acyl-CoA thioesteraes 11 [EC:3.1.2.-] | (RefSeq) ACOT11; acyl-CoA thioesterase 11	--	[I]	Lipid transport and metabolism	START domain;; Thioesterase superfamily;; Uncharacterized conserved protein (DUF2181)	Protein FAM151A OS=Pongo abelii OX=9601 GN=FAM151A PE=2 SV=1	I	Lipid transport and metabolism	PREDICTED: acyl-coenzyme A thioesterase 11 isoform X4 [Ovis aries musimon]	molecular function: binding (GO:0005488);; biological process: response to stimulus (GO:0050896);; cellular component: extracellular region (GO:0005576);; cellular component: organelle (GO:0043226);; cellular component: extracellular region part (GO:0044421)
gene-LOC114116088	1.3295	0.907575	0.378075	5.32205	2.72662	3.8344	0	3.88107	2.08568	6.0298	0.79867	0.0192351	0.943243	up	0.784491	0.123745	normal	0.244777	0.554588	normal	--	--	Molecular Function: antigen binding (GO:0003823);; Cellular Component: plasma membrane (GO:0005886);; Biological Process: antigen processing and presentation (GO:0019882);; Biological Process: natural killer cell mediated cytotoxicity (GO:0042267);; Molecular Function: natural killer cell lectin-like receptor binding (GO:0046703);;	K07986|2.17756e-50|bta:100126815|K07986 UL16 binding protein | (RefSeq) MHC class I-like family A1	Natural killer cell mediated cytotoxicity (ko04650)	--	--	--	--	S	Function unknown	PREDICTED: NKG2D ligand 3-like [Capra hircus]	molecular function: binding (GO:0005488);; cellular component: cell (GO:0005623);; cellular component: membrane (GO:0016020);; cellular component: cell part (GO:0044464);; biological process: immune system process (GO:0002376);; biological process: cell killing (GO:0001906);; biological process: single-organism process (GO:0044699);; biological process: response to stimulus (GO:0050896)
gene-LOC114116131	0.707564	1.12852	1.21633	2.90197	1.07812	2.58162	1.81196	4.18306	2.91416	3.78851	2.2897	0.406215	0.502853	normal	0.0128037	0.972774	up	0.0040771	1.02964	up	--	--	Biological Process: response to heat (GO:0009408);; Biological Process: response to cold (GO:0009409);; Biological Process: response to water deprivation (GO:0009414);; Biological Process: response to mechanical stimulus (GO:0009612);; Cellular Component: integral component of membrane (GO:0016021);; Biological Process: multicellular organismal response to stress (GO:0033555);; Biological Process…	--	--	--	--	MANEC domain	--	S	Function unknown	PREDICTED: low-density lipoprotein receptor-related protein 11 isoform X2 [Bubalus bubalis]	biological process: response to stimulus (GO:0050896);; cellular component: membrane (GO:0016020);; cellular component: membrane part (GO:0044425);; biological process: multicellular organismal process (GO:0032501);; biological process: single-organism process (GO:0044699);; molecular function: binding (GO:0005488)
gene-LOC114116592	4.03188	4.36653	4.72966	60.9193	65.7492	4.40072	36.6704	39.6636	43.699	30.4198	2.64329	9.86e-126	3.59979	up	0.0720878	0.738272	normal	0.264329	0.463743	normal	--	--	Molecular Function: nucleotide binding (GO:0000166);; Biological Process: behavioral fear response (GO:0001662);; Cellular Component: nucleus (GO:0005634);; Cellular Component: mitochondrial outer membrane (GO:0005741);; Cellular Component: mitochondrial inner membrane (GO:0005743);; Cellular Component: plasma membrane (GO:0005886);; Biological Process: apoptotic process (GO:0006915);; Biological…	K05862|0|ocu:100008751|K05862 voltage-dependent anion channel protein 1 | (RefSeq) VDAC1; voltage dependent anion channel 1	Calcium signaling pathway (ko04020);; cGMP-PKG signaling pathway (ko04022);; Parkinson's disease (ko05012);; Huntington's disease (ko05016);; Influenza A (ko05164);; HTLV-I infection (ko05166)	[P]	Inorganic ion transport and metabolism	Eukaryotic porin	Voltage-dependent anion-selective channel protein 1 OS=Oryctolagus cuniculus OX=9986 GN=VDAC1 PE=2 SV=3	U	Intracellular trafficking, secretion, and vesicular transport	Voltage-dependent anion-selective channel protein 1, partial [Bos mutus]	molecular function: binding (GO:0005488);; biological process: behavior (GO:0007610);; biological process: multicellular organismal process (GO:0032501);; biological process: single-organism process (GO:0044699);; biological process: response to stimulus (GO:0050896);; cellular component: cell (GO:0005623);; cellular component: organelle (GO:0043226);; cellular component: cell part (GO:0044464);;…
gene-LPIN1	28.8588	21.4874	37.9576	39.6072	57.8403	28.9209	57.1546	28.028	80.2178	41.3343	90.584	0.0585231	0.685289	normal	0.42513	0.39557	normal	0.00278043	0.974212	up	--	--	Molecular Function: transcription coactivator activity (GO:0003713);; Cellular Component: nucleus (GO:0005634);; Cellular Component: mitochondrial outer membrane (GO:0005741);; Molecular Function: phosphatidate phosphatase activity (GO:0008195);; Biological Process: fatty acid catabolic process (GO:0009062);; Biological Process: dephosphorylation (GO:0016311);; Biological Process: triglyceride bi…	K15728|0|cfr:102513388|K15728 phosphatidate phosphatase LPIN [EC:3.1.3.4] | (RefSeq) LPIN1; lipin 1	Glycerolipid metabolism (ko00561);; Glycerophospholipid metabolism (ko00564)	[NI]	Cell motility;; Lipid transport and metabolism	LNS2 (Lipin/Ned1/Smp2);; lipin, N-terminal conserved region;; Lipin/Ned1/Smp2 multi-domain protein middle domain	--	S	Function unknown	PREDICTED: phosphatidate phosphatase LPIN1 isoform X1 [Capra hircus]	molecular function: transcription factor activity, protein binding (GO:0000988);; biological process: biological regulation (GO:0065007);; cellular component: cell (GO:0005623);; cellular component: organelle (GO:0043226);; cellular component: cell part (GO:0044464);; cellular component: membrane (GO:0016020);; cellular component: organelle part (GO:0044422);; molecular function: catalytic activi…
gene-MAN2C1	9.71966	7.23984	9.65555	8.76538	8.69063	12.4056	14.7987	12.6796	13.6283	11.5459	10.3069	0.903729	0.0866257	normal	0.000921863	0.664164	up	0.209088	0.404094	normal	[G]	Carbohydrate transport and metabolism	Molecular Function: alpha-mannosidase activity (GO:0004559);; Cellular Component: vacuole (GO:0005773);; Biological Process: mannose metabolic process (GO:0006013);; Biological Process: protein deglycosylation (GO:0006517);; Molecular Function: zinc ion binding (GO:0008270);; Molecular Function: carbohydrate binding (GO:0030246);;	K01191|0|bom:102280843|K01191 alpha-mannosidase [EC:3.2.1.24] | (RefSeq) MAN2C1; mannosidase alpha class 2C member 1	Other glycan degradation (ko00511)	[G]	Carbohydrate transport and metabolism	Glycosyl hydrolases family 38 N-terminal domain;; Glycosyl hydrolases family 38 C-terminal domain;; Alpha mannosidase middle domain	--	G	Carbohydrate transport and metabolism	PREDICTED: alpha-mannosidase 2C1 isoform X2 [Ovis aries musimon]	molecular function: catalytic activity (GO:0003824);; cellular component: cell (GO:0005623);; cellular component: organelle (GO:0043226);; cellular component: cell part (GO:0044464);; biological process: metabolic process (GO:0008152);; biological process: single-organism process (GO:0044699);; biological process: cellular process (GO:0009987);; molecular function: binding (GO:0005488)
gene-MANEAL	1.16755	0.862236	0.866589	1.0427	1.26503	1.48036	2.22606	1.75868	2.05281	0.762996	1.33606	0.715689	0.267954	normal	0.00618982	0.83698	up	0.587594	0.333976	normal	[R]	General function prediction only	--	--	--	--	--	Glycosyl hydrolase family 99	Glycoprotein endo-alpha-1,2-mannosidase OS=Pongo abelii OX=9601 GN=MANEA PE=2 SV=1	S	Function unknown	PREDICTED: glycoprotein endo-alpha-1,2-mannosidase-like protein isoform X3 [Ovis aries musimon]	--
gene-MAOB	3.82418	1.62145	2.94016	2.39989	5.50836	4.07417	5.44877	7.67141	3.04581	2.48701	2.81409	0.629228	0.352582	normal	0.0308249	0.828251	up	0.970484	0.0338205	normal	[E]	Amino acid transport and metabolism	Cellular Component: mitochondrial outer membrane (GO:0005741);; Cellular Component: mitochondrial inner membrane (GO:0005743);; Cellular Component: integral component of membrane (GO:0016021);; Molecular Function: oxidoreductase activity (GO:0016491);; Biological Process: substantia nigra development (GO:0021762);; Biological Process: oxidation-reduction process (GO:0055114);; Cellular Component:…	K00274|0|chx:102180115|K00274 monoamine oxidase [EC:1.4.3.4] | (RefSeq) MAOB; amine oxidase [flavin-containing] B	Glycine, serine and threonine metabolism (ko00260);; Arginine and proline metabolism (ko00330);; Histidine metabolism (ko00340);; Tyrosine metabolism (ko00350);; Phenylalanine metabolism (ko00360);; Tryptophan metabolism (ko00380);; Drug metabolism - cytochrome P450 (ko00982);; Serotonergic synapse (ko04726);; Dopaminergic synapse (ko04728);; Cocaine addiction (ko05030);; Amphetamine addiction (k…	[Q]	Secondary metabolites biosynthesis, transport and catabolism	Flavin containing amine oxidoreductase;; NAD(P)-binding Rossmann-like domain;; FAD dependent oxidoreductase;; FAD binding domain;; FAD dependent oxidoreductase;; FAD binding domain;; Pyridine nucleotide-disulphide oxidoreductase	Amine oxidase [flavin-containing] B OS=Bos taurus OX=9913 GN=MAOB PE=1 SV=4	S	Function unknown	PREDICTED: amine oxidase [flavin-containing] B isoform X2 [Ovis aries musimon]	cellular component: cell (GO:0005623);; cellular component: membrane (GO:0016020);; cellular component: organelle (GO:0043226);; cellular component: organelle part (GO:0044422);; cellular component: cell part (GO:0044464);; cellular component: membrane part (GO:0044425);; molecular function: catalytic activity (GO:0003824);; biological process: developmental process (GO:0032502);; biological proc…
gene-METRNL	8.54229	10.1528	7.93432	19.4113	19.0126	5.12621	7.0507	6.11193	14.3052	7.81727	7.76222	2.28e-05	1.02946	up	0.380127	-0.361611	normal	0.847808	0.137614	normal	--	--	Molecular Function: hormone activity (GO:0005179);; Cellular Component: extracellular space (GO:0005615);; Biological Process: response to cold (GO:0009409);; Biological Process: response to muscle activity (GO:0014850);; Biological Process: negative regulation of inflammatory response (GO:0050728);; Cellular Component: extracellular exosome (GO:0070062);; Biological Process: positive regulation …	--	--	--	--	--	--	S	Function unknown	PREDICTED: meteorin-like protein [Bison bison bison]	molecular function: binding (GO:0005488);; cellular component: extracellular region (GO:0005576);; cellular component: extracellular region part (GO:0044421);; biological process: response to stimulus (GO:0050896);; biological process: biological regulation (GO:0065007);; cellular component: organelle (GO:0043226)
gene-METTL21C	2.84401	5.91563	7.55067	12.9377	18.7232	7.75635	6.13168	2.36515	13.7534	1.59671	10.9385	0.00900342	1.00748	up	0.946887	0.0777665	normal	0.815789	0.159224	normal	[R]	General function prediction only	Cellular Component: nucleus (GO:0005634);; Molecular Function: protein-lysine N-methyltransferase activity (GO:0016279);; Biological Process: peptidyl-lysine methylation (GO:0018022);;	--	--	[A]	RNA processing and modification	Lysine methyltransferase;; Methyltransferase domain	Protein-lysine methyltransferase METTL21C OS=Bos taurus OX=9913 GN=METTL21C PE=2 SV=1	Q	Secondary metabolites biosynthesis, transport and catabolism	PREDICTED: protein-lysine methyltransferase METTL21C [Capra hircus]	cellular component: cell (GO:0005623);; cellular component: organelle (GO:0043226);; cellular component: cell part (GO:0044464);; molecular function: catalytic activity (GO:0003824);; biological process: metabolic process (GO:0008152);; biological process: cellular process (GO:0009987)
gene-MLYCD	32.2722	30.8177	35.4612	48.6895	45.2977	24.3761	62.0242	36.5234	48.4743	44.4064	60.7183	0.00311101	0.586736	up	0.522927	0.333769	normal	0.0374124	0.597735	up	[G]	Carbohydrate transport and metabolism	Cellular Component: mitochondrial matrix (GO:0005759);; Biological Process: fatty acid biosynthetic process (GO:0006633);; Biological Process: positive regulation of fatty acid oxidation (GO:0046321);; Molecular Function: malonyl-CoA decarboxylase activity (GO:0050080);; Biological Process: malonyl-CoA catabolic process (GO:2001294);;	K01578|0|chx:102183446|K01578 malonyl-CoA decarboxylase [EC:4.1.1.9] | (RefSeq) MLYCD; malonyl-CoA decarboxylase	beta-Alanine metabolism (ko00410);; Propanoate metabolism (ko00640);; Peroxisome (ko04146);; AMPK signaling pathway (ko04152)	[G]	Carbohydrate transport and metabolism	Malonyl-CoA decarboxylase C-terminal domain;; Malonyl-CoA decarboxylase N-terminal domain	--	G	Carbohydrate transport and metabolism	PREDICTED: malonyl-CoA decarboxylase, mitochondrial [Ovis aries musimon]	cellular component: cell (GO:0005623);; cellular component: membrane-enclosed lumen (GO:0031974);; cellular component: organelle (GO:0043226);; cellular component: organelle part (GO:0044422);; cellular component: cell part (GO:0044464);; biological process: metabolic process (GO:0008152);; biological process: cellular process (GO:0009987);; biological process: single-organism process (GO:0044699…
gene-MRPL2	23.9396	23.2127	21.4093	32.4245	38.7793	26.1856	37.8582	26.3435	36.8391	36.5383	25.0263	0.00653947	0.666175	up	0.0791033	0.467216	normal	0.1772	0.470927	normal	[J]	Translation, ribosomal structure and biogenesis	Biological Process: cytoplasmic translation (GO:0002181);; Molecular Function: structural constituent of ribosome (GO:0003735);; Cellular Component: mitochondrial inner membrane (GO:0005743);; Cellular Component: mitochondrial large ribosomal subunit (GO:0005762);; Molecular Function: transferase activity (GO:0016740);; Molecular Function: RNA binding (GO:0044822);; Biological Process: mitochondr…	K02886|0|oas:101113180|K02886 large subunit ribosomal protein L2 | (RefSeq) MRPL2; mitochondrial ribosomal protein L2	Ribosome (ko03010)	[J]	Translation, ribosomal structure and biogenesis	Ribosomal Proteins L2, C-terminal domain;; Ribosomal Proteins L2, RNA binding domain	39S ribosomal protein L2, mitochondrial OS=Bos taurus OX=9913 GN=MRPL2 PE=1 SV=2	J	Translation, ribosomal structure and biogenesis	PREDICTED: 39S ribosomal protein L2, mitochondrial isoform X1 [Ovis aries]	biological process: metabolic process (GO:0008152);; biological process: cellular process (GO:0009987);; molecular function: structural molecule activity (GO:0005198);; cellular component: cell (GO:0005623);; cellular component: membrane (GO:0016020);; cellular component: organelle (GO:0043226);; cellular component: organelle part (GO:0044422);; cellular component: cell part (GO:0044464);; cellul…
gene-MRPL21	20.8872	34.3717	30.958	33.907	38.8832	39.5042	55.1573	39.767	26.5582	45.5494	34.484	0.599174	0.282746	normal	0.0266014	0.606051	up	0.692125	0.222436	normal	[J]	Translation, ribosomal structure and biogenesis	Molecular Function: structural constituent of ribosome (GO:0003735);; Cellular Component: mitochondrial inner membrane (GO:0005743);; Cellular Component: mitochondrial large ribosomal subunit (GO:0005762);; Molecular Function: RNA binding (GO:0044822);; Biological Process: mitochondrial translational initiation (GO:0070124);; Biological Process: mitochondrial translational elongation (GO:0070125)…	K02888|2.29879e-88|bom:102265854|K02888 large subunit ribosomal protein L21 | (RefSeq) MRPL21; mitochondrial ribosomal protein L21	Ribosome (ko03010)	[J]	Translation, ribosomal structure and biogenesis	Ribosomal prokaryotic L21 protein	39S ribosomal protein L21, mitochondrial OS=Bos taurus OX=9913 GN=MRPL21 PE=1 SV=1	J	Translation, ribosomal structure and biogenesis	PREDICTED: 39S ribosomal protein L21, mitochondrial isoform X2 [Ovis aries musimon]	molecular function: structural molecule activity (GO:0005198);; cellular component: cell (GO:0005623);; cellular component: membrane (GO:0016020);; cellular component: organelle (GO:0043226);; cellular component: organelle part (GO:0044422);; cellular component: cell part (GO:0044464);; cellular component: macromolecular complex (GO:0032991);; biological process: metabolic process (GO:0008152);; …
gene-MTFP1	7.73432	13.524	10.4815	15.8173	21.8388	9.13754	24.3469	12.8139	27.9658	19.9642	20.4676	0.129478	0.652744	normal	0.344621	0.485775	normal	0.00565662	0.863952	up	--	--	Biological Process: mitochondrial fission (GO:0000266);; Cellular Component: mitochondrial inner membrane (GO:0005743);; Cellular Component: integral component of membrane (GO:0016021);;	K17981|3.18404e-86|phd:102338978|K17981 mitochondrial fission process protein 1 | (RefSeq) MTFP1; mitochondrial fission process 1	--	[S]	Function unknown	Mitochondrial 18 KDa protein (MTP18)	--	O	Posttranslational modification, protein turnover, chaperones	PREDICTED: mitochondrial fission process protein 1 isoform X2 [Ovis aries]	biological process: cellular process (GO:0009987);; biological process: cellular component organization or biogenesis (GO:0071840);; cellular component: cell (GO:0005623);; cellular component: membrane (GO:0016020);; cellular component: organelle (GO:0043226);; cellular component: organelle part (GO:0044422);; cellular component: cell part (GO:0044464);; cellular component: membrane part (GO:0044…
gene-MTHFR	2.87816	2.36629	3.17971	3.50743	3.65553	3.80845	5.36027	4.51045	3.05313	4.12027	2.84535	0.20432	0.398031	normal	8.29e-05	0.754928	up	0.600844	0.244579	normal	[E]	Amino acid transport and metabolism	Molecular Function: methylenetetrahydrofolate reductase (NAD(P)H) activity (GO:0004489);; Cellular Component: cytosol (GO:0005829);; Biological Process: methionine metabolic process (GO:0006555);; Biological Process: regulation of histone methylation (GO:0031060);; Molecular Function: protein complex binding (GO:0032403);; Biological Process: tetrahydrofolate interconversion (GO:0035999);; Molecu…	K00297|0|chx:102182523|K00297 methylenetetrahydrofolate reductase (NADPH) [EC:1.5.1.20] | (RefSeq) MTHFR; methylenetetrahydrofolate reductase	One carbon pool by folate (ko00670);; Carbon metabolism (ko01200)	[E]	Amino acid transport and metabolism	Methylenetetrahydrofolate reductase;; Domain of unknown function (DUF4684);; Domain of unknown function (DUF4684)	Methylenetetrahydrofolate reductase OS=Bos taurus OX=9913 GN=MTHFR PE=2 SV=1	E	Amino acid transport and metabolism	PREDICTED: methylenetetrahydrofolate reductase isoform X1 [Capra hircus]	molecular function: catalytic activity (GO:0003824);; biological process: metabolic process (GO:0008152);; biological process: single-organism process (GO:0044699);; cellular component: cell (GO:0005623);; cellular component: cell part (GO:0044464);; biological process: cellular process (GO:0009987);; biological process: biological regulation (GO:0065007);; molecular function: binding (GO:0005488…
gene-MYC	6.52964	5.37392	9.54352	10.8743	13.9307	15.4493	22.6748	9.84274	7.25957	7.31444	13.4454	0.0573759	0.711749	normal	0.00239467	0.969843	up	0.589921	0.314368	normal	--	--	Molecular Function: transcription factor activity, sequence-specific DNA binding (GO:0003700);; Cellular Component: nucleolus (GO:0005730);; Cellular Component: spindle (GO:0005819);; Biological Process: chromatin remodeling (GO:0006338);; Biological Process: cellular iron ion homeostasis (GO:0006879);; Biological Process: activation of cysteine-type endopeptidase activity involved in apoptotic p…	K04377|0|oas:443447|K04377 Myc proto-oncogene protein | (RefSeq) MYC, C-MYC; v-myc avian myelocytomatosis viral oncogene homolog	MAPK signaling pathway (ko04010);; ErbB signaling pathway (ko04012);; Cell cycle (ko04110);; PI3K-Akt signaling pathway (ko04151);; Wnt signaling pathway (ko04310);; TGF-beta signaling pathway (ko04350);; Hippo signaling pathway (ko04390);; Signaling pathways regulating pluripotency of stem cells (ko04550);; Jak-STAT signaling pathway (ko04630);; Thyroid hormone signaling pathway (ko04919);; Hepa…	--	--	Myc amino-terminal region;; Myc leucine zipper domain;; Helix-loop-helix DNA-binding domain	Myc proto-oncogene protein OS=Ovis aries OX=9940 GN=MYC PE=2 SV=1	K	Transcription	myc proto-oncogene protein [Ovis aries]	molecular function: nucleic acid binding transcription factor activity (GO:0001071);; biological process: biological regulation (GO:0065007);; cellular component: cell (GO:0005623);; cellular component: organelle (GO:0043226);; cellular component: organelle part (GO:0044422);; cellular component: cell part (GO:0044464);; biological process: cellular process (GO:0009987);; biological process: cell…
gene-NABP1	1.18421	0.852362	1.42301	1.92816	2.94701	1.48084	2.65487	2.72042	2.45089	1.76481	1.5804	0.0333669	0.854129	up	0.0225048	0.845814	up	0.181949	0.598443	normal	[L]	Replication, recombination and repair	Biological Process: double-strand break repair via homologous recombination (GO:0000724);; Cellular Component: nuclear chromosome, telomeric region (GO:0000784);; Molecular Function: single-stranded DNA binding (GO:0003697);; Molecular Function: RNA binding (GO:0003723);; Cellular Component: nucleoplasm (GO:0005654);; Cellular Component: cytoplasm (GO:0005737);; Biological Process: mitotic cell c…	--	--	[R]	General function prediction only	OB-fold nucleic acid binding domain	SOSS complex subunit B2 OS=Bos taurus OX=9913 GN=NABP1 PE=2 SV=1	S	Function unknown	PREDICTED: SOSS complex subunit B2 isoform X1 [Capra hircus]	biological process: metabolic process (GO:0008152);; biological process: cellular process (GO:0009987);; biological process: response to stimulus (GO:0050896);; cellular component: cell (GO:0005623);; cellular component: membrane-enclosed lumen (GO:0031974);; cellular component: organelle (GO:0043226);; cellular component: organelle part (GO:0044422);; cellular component: cell part (GO:0044464);;…
gene-NAPEPLD	7.61493	9.72679	9.07228	11.4947	17.12	10.7846	4.55756	9.55474	15.7097	4.38524	11.1655	0.0359803	0.714764	up	0.942236	0.0770954	normal	0.755203	0.223239	normal	[G]	Carbohydrate transport and metabolism	Molecular Function: calcium ion binding (GO:0005509);; Cellular Component: cytoplasm (GO:0005737);; Molecular Function: zinc ion binding (GO:0008270);; Biological Process: phospholipid catabolic process (GO:0009395);; Cellular Component: membrane (GO:0016020);; Cellular Component: extracellular exosome (GO:0070062);; Molecular Function: N-acylphosphatidylethanolamine-specific phospholipase D acti…	K13985|0|oas:101119039|K13985 N-acyl-phosphatidylethanolamine-hydrolysing phospholipase D [EC:3.1.4.54] | (RefSeq) NAPEPLD; N-acyl phosphatidylethanolamine phospholipase D	Retrograde endocannabinoid signaling (ko04723)	[R]	General function prediction only	Beta-lactamase superfamily domain;; Beta-lactamase superfamily domain	N-acyl-phosphatidylethanolamine-hydrolyzing phospholipase D OS=Bos taurus OX=9913 GN=NAPEPLD PE=2 SV=1	S	Function unknown	PREDICTED: N-acyl-phosphatidylethanolamine-hydrolyzing phospholipase D isoform X3 [Ovis aries musimon]	molecular function: binding (GO:0005488);; cellular component: cell (GO:0005623);; cellular component: cell part (GO:0044464);; biological process: metabolic process (GO:0008152);; biological process: cellular process (GO:0009987);; biological process: single-organism process (GO:0044699);; cellular component: membrane (GO:0016020);; cellular component: extracellular region (GO:0005576);; cellula…
gene-NDUFA5	40.2093	31.8187	35.169	50.6081	61.7403	41.2602	39.2997	22.3938	30.354	58.8594	44.1057	0.00343498	0.682285	up	0.944195	0.0648327	normal	0.604969	0.281199	normal	--	--	Cellular Component: mitochondrial respiratory chain complex I (GO:0005747);; Molecular Function: NADH dehydrogenase (ubiquinone) activity (GO:0008137);; Biological Process: respiratory electron transport chain (GO:0022904);;	K03949|2.30113e-52|phd:102317817|K03949 NADH dehydrogenase (ubiquinone) 1 alpha subcomplex subunit 5 | (RefSeq) NDUFA5; NADH:ubiquinone oxidoreductase subunit A5	Oxidative phosphorylation (ko00190);; Non-alcoholic fatty liver disease (NAFLD) (ko04932);; Alzheimer's disease (ko05010);; Parkinson's disease (ko05012);; Huntington's disease (ko05016)	[C]	Energy production and conversion	ETC complex I subunit conserved region	NADH dehydrogenase [ubiquinone] 1 alpha subcomplex subunit 5 OS=Bos taurus OX=9913 GN=NDUFA5 PE=1 SV=3	I	Lipid transport and metabolism	PREDICTED: NADH dehydrogenase [ubiquinone] 1 alpha subcomplex subunit 5 isoform X2 [Ovis aries]	cellular component: cell (GO:0005623);; cellular component: membrane (GO:0016020);; cellular component: macromolecular complex (GO:0032991);; cellular component: organelle (GO:0043226);; cellular component: organelle part (GO:0044422);; cellular component: membrane part (GO:0044425);; cellular component: cell part (GO:0044464);; molecular function: catalytic activity (GO:0003824);; biological pro…
gene-NFIL3	5.58906	3.87105	8.96795	22.1519	21.4066	16.3455	20.8778	20.6166	3.7893	9.05308	11.9941	2.75e-06	1.37537	up	2.87e-07	1.36876	up	0.682956	0.279537	normal	--	--	Biological Process: negative regulation of transcription from RNA polymerase II promoter (GO:0000122);; Molecular Function: RNA polymerase II core promoter sequence-specific DNA binding (GO:0000979);; Molecular Function: transcriptional repressor activity, RNA polymerase II core promoter proximal region sequence-specific binding (GO:0001078);; Cellular Component: nucleus (GO:0005634);; Biological…	K09059|0|phd:102316639|K09059 nuclear factor, interleukin 3 regulated | (RefSeq) NFIL3; nuclear factor, interleukin 3 regulated	--	[K]	Transcription	Vertebrate interleukin-3 regulated transcription factor;; Basic region leucine zipper	Nuclear factor interleukin-3-regulated protein OS=Bos taurus OX=9913 GN=NFIL3 PE=2 SV=1	K	Transcription	nuclear factor interleukin-3-regulated protein [Ovis aries]	biological process: biological regulation (GO:0065007);; molecular function: binding (GO:0005488);; molecular function: nucleic acid binding transcription factor activity (GO:0001071);; cellular component: cell (GO:0005623);; cellular component: organelle (GO:0043226);; cellular component: cell part (GO:0044464);; biological process: immune system process (GO:0002376);; biological process: respon…
gene-NFKBIA	25.8048	22.7329	31.4617	38.4239	52.9916	32.8803	68.2347	50.3994	42.5922	31.5346	30.3086	0.00656102	0.759495	up	0.00113691	0.868446	up	0.298059	0.366731	normal	[T]	Signal transduction mechanisms	Biological Process: protein import into nucleus, translocation (GO:0000060);; Cellular Component: nucleus (GO:0005634);; Cellular Component: cytosol (GO:0005829);; Cellular Component: plasma membrane (GO:0005886);; Biological Process: cytoplasmic sequestering of NF-kappaB (GO:0007253);; Molecular Function: nuclear localization sequence binding (GO:0008139);; Biological Process: negative regulatio…	K04734|0|chx:102169137|K04734 NF-kappa-B inhibitor alpha | (RefSeq) NFKBIA; NFKB inhibitor alpha	cAMP signaling pathway (ko04024);; Chemokine signaling pathway (ko04062);; NF-kappa B signaling pathway (ko04064);; Apoptosis (ko04210);; Osteoclast differentiation (ko04380);; Toll-like receptor signaling pathway (ko04620);; NOD-like receptor signaling pathway (ko04621);; RIG-I-like receptor signaling pathway (ko04622);; Cytosolic DNA-sensing pathway (ko04623);; T cell receptor signaling pathway…	[R]	General function prediction only	Ankyrin repeats (3 copies);; Ankyrin repeat;; Ankyrin repeat;; Ankyrin repeats (many copies);; Ankyrin repeats (many copies)	NF-kappa-B inhibitor alpha OS=Sus scrofa OX=9823 GN=NFKBIA PE=2 SV=1	S	Function unknown	NF-kappa-B inhibitor alpha [Ovis aries]	biological process: localization (GO:0051179);; cellular component: cell (GO:0005623);; cellular component: organelle (GO:0043226);; cellular component: cell part (GO:0044464);; cellular component: membrane (GO:0016020);; biological process: biological regulation (GO:0065007);; molecular function: binding (GO:0005488);; biological process: cellular process (GO:0009987);; biological process: signa…
gene-NMNAT3	4.40588	3.40561	2.6974	7.31671	6.59771	5.14855	2.89085	5.48088	3.53783	6.84851	2.334	0.0150802	0.840383	up	0.566482	0.362879	normal	0.80563	0.190106	normal	[H]	Coenzyme transport and metabolism	Molecular Function: nicotinamide-nucleotide adenylyltransferase activity (GO:0000309);; Molecular Function: nicotinate-nucleotide adenylyltransferase activity (GO:0004515);; Molecular Function: ATP binding (GO:0005524);; Cellular Component: mitochondrion (GO:0005739);; Biological Process: NAD biosynthetic process (GO:0009435);; Biological Process: response to wounding (GO:0009611);;	K06210|2.4922e-151|chx:102183641|K06210 nicotinamide mononucleotide adenylyltransferase [EC:2.7.7.1 2.7.7.18] | (RefSeq) NMNAT3; nicotinamide nucleotide adenylyltransferase 3	Nicotinate and nicotinamide metabolism (ko00760)	[H]	Coenzyme transport and metabolism	Cytidylyltransferase-like	Nicotinamide/nicotinic acid mononucleotide adenylyltransferase 1 OS=Bos taurus OX=9913 GN=NMNAT1 PE=2 SV=1	H	Coenzyme transport and metabolism	PREDICTED: nicotinamide/nicotinic acid mononucleotide adenylyltransferase 3 [Ovis aries musimon]	molecular function: catalytic activity (GO:0003824);; molecular function: binding (GO:0005488);; cellular component: cell (GO:0005623);; cellular component: organelle (GO:0043226);; cellular component: cell part (GO:0044464);; biological process: metabolic process (GO:0008152);; biological process: cellular process (GO:0009987);; biological process: single-organism process (GO:0044699);; biologic…
gene-NMRK2	65.3327	124.516	46.1887	196.186	194.112	46.0052	380.873	128.09	273.854	139.818	152.3	0.0399201	0.872025	up	0.586756	0.33516	normal	0.0571326	0.801945	normal	[F]	Nucleotide transport and metabolism	Cellular Component: intracellular (GO:0005622);; Biological Process: integrin-mediated signaling pathway (GO:0007229);; Molecular Function: kinase activity (GO:0016301);; Biological Process: phosphorylation (GO:0016310);; Biological Process: negative regulation of myoblast differentiation (GO:0045662);;	K10524|3.86899e-122|oas:101114607|K10524 nicotinamide/nicotinate riboside kinase [EC:2.7.1.22 2.7.1.173] | (RefSeq) NMRK2; nicotinamide riboside kinase 2	Nicotinate and nicotinamide metabolism (ko00760)	[F]	Nucleotide transport and metabolism	AAA domain	--	S	Function unknown	PREDICTED: nicotinamide riboside kinase 2 isoform X1 [Ovis aries]	cellular component: cell (GO:0005623);; cellular component: cell part (GO:0044464);; biological process: cellular process (GO:0009987);; biological process: signaling (GO:0023052);; biological process: single-organism process (GO:0044699);; biological process: response to stimulus (GO:0050896);; biological process: biological regulation (GO:0065007);; molecular function: catalytic activity (GO:00…
gene-NOS1	4.58226	5.61876	7.52112	13.0955	10.1833	5.48035	7.9502	5.03024	10.5035	8.62239	6.5163	0.00507104	0.874972	up	0.808333	0.15395	normal	0.246131	0.460708	normal	[T]	Signal transduction mechanisms	Biological Process: response to hypoxia (GO:0001666);; Biological Process: regulation of sodium ion transport (GO:0002028);; Molecular Function: nitric-oxide synthase activity (GO:0004517);; Molecular Function: iron ion binding (GO:0005506);; Molecular Function: calmodulin binding (GO:0005516);; Cellular Component: mitochondrion (GO:0005739);; Cellular Component: cytoskeleton (GO:0005856);; Cellu…	K13240|0|chx:102185490|K13240 nitric-oxide synthase, brain [EC:1.14.13.39] | (RefSeq) NOS1; nitric oxide synthase 1	Arginine biosynthesis (ko00220);; Arginine and proline metabolism (ko00330);; Calcium signaling pathway (ko04020);; Phagosome (ko04145);; Circadian entrainment (ko04713);; Long-term depression (ko04730);; Salivary secretion (ko04970);; Alzheimer's disease (ko05010);; Amyotrophic lateral sclerosis (ALS) (ko05014)	[C]	Energy production and conversion	Nitric oxide synthase, oxygenase domain;; FAD binding domain;; Flavodoxin;; Oxidoreductase NAD-binding domain;; PDZ domain (Also known as DHR or GLGF)	Nitric oxide synthase, brain OS=Oryctolagus cuniculus OX=9986 GN=NOS1 PE=2 SV=1	P	Inorganic ion transport and metabolism	PREDICTED: nitric oxide synthase, brain isoform X1 [Ovis aries musimon]	biological process: response to stimulus (GO:0050896);; biological process: biological regulation (GO:0065007);; molecular function: catalytic activity (GO:0003824);; biological process: metabolic process (GO:0008152);; biological process: single-organism process (GO:0044699);; molecular function: binding (GO:0005488);; cellular component: cell (GO:0005623);; cellular component: organelle (GO:004…
gene-NR4A2	5.53976	2.01659	3.59709	17.6199	2.02132	10.6213	4.89287	14.4091	1.4491	6.26146	1.40323	0.611754	0.281707	normal	0.0191961	0.939155	up	0.94364	-0.0619776	normal	--	--	Biological Process: negative regulation of transcription from RNA polymerase II promoter (GO:0000122);; Molecular Function: RNA polymerase II core promoter sequence-specific DNA binding (GO:0000979);; Molecular Function: transcriptional activator activity, RNA polymerase II core promoter proximal region sequence-specific binding (GO:0001077);; Biological Process: response to hypoxia (GO:0001666);…	K08558|0|ssc:100157120|K08558 nuclear receptor subfamily 4 group A member 2 | (RefSeq) NR4A2; nuclear receptor subfamily 4 group A member 2	Aldosterone synthesis and secretion (ko04925)	[K]	Transcription	Zinc finger, C4 type (two domains);; Ligand-binding domain of nuclear hormone receptor	Nuclear receptor subfamily 4 group A member 2 OS=Bos taurus OX=9913 GN=NR4A2 PE=2 SV=1	K	Transcription	nuclear receptor subfamily 4 group A member 2 [Sus scrofa]	biological process: biological regulation (GO:0065007);; molecular function: binding (GO:0005488);; molecular function: nucleic acid binding transcription factor activity (GO:0001071);; biological process: metabolic process (GO:0008152);; biological process: cellular process (GO:0009987);; biological process: response to stimulus (GO:0050896);; biological process: locomotion (GO:0040011);; biolog…
gene-NR4A3	0.182378	0.055803	0.488763	1.69876	0.232745	1.95513	0.659948	1.52856	0.644703	0.566637	0.306658	0.524058	0.289918	normal	0.00597906	1.04293	up	0.447503	0.427121	normal	--	--	Biological Process: negative regulation of transcription from RNA polymerase II promoter (GO:0000122);; Molecular Function: RNA polymerase II core promoter proximal region sequence-specific DNA binding (GO:0000978);; Molecular Function: core promoter sequence-specific DNA binding (GO:0001046);; Molecular Function: transcriptional activator activity, RNA polymerase II core promoter proximal region…	K08559|0|bta:528877|K08559 nuclear receptor subfamily 4 group A member 3 | (RefSeq) NR4A3; nuclear receptor subfamily 4 group A member 3	Transcriptional misregulation in cancer (ko05202)	[K]	Transcription	Zinc finger, C4 type (two domains);; Ligand-binding domain of nuclear hormone receptor	Nuclear receptor subfamily 4 group A member 2 OS=Bos taurus OX=9913 GN=NR4A2 PE=2 SV=1	K	Transcription	PREDICTED: nuclear receptor subfamily 4 group A member 3 isoform X1 [Capra hircus]	biological process: biological regulation (GO:0065007);; molecular function: binding (GO:0005488);; molecular function: nucleic acid binding transcription factor activity (GO:0001071);; biological process: metabolic process (GO:0008152);; biological process: cellular process (GO:0009987);; biological process: multicellular organismal process (GO:0032501);; biological process: developmental proces…
gene-OTUD1	3.98334	6.02278	4.47729	27.3662	4.6034	25.7485	30.5199	106.954	8.17655	17.2062	11.3214	0.371014	0.450572	normal	0.00106592	1.13864	up	0.00549105	0.966808	up	--	--	Molecular Function: thiol-dependent ubiquitin-specific protease activity (GO:0004843);; Biological Process: protein K63-linked deubiquitination (GO:0070536);;	K13716|0|bta:104968459|K13716 OTU domain-containing protein 1 [EC:3.4.19.12] | (RefSeq) OTUD1; OTU deubiquitinase 1	--	[TO]	Signal transduction mechanisms;; Posttranslational modification, protein turnover, chaperones	OTU-like cysteine protease	--	O	Posttranslational modification, protein turnover, chaperones	OTU domain-containing protein 1 [Odocoileus virginianus texanus]	molecular function: catalytic activity (GO:0003824);; biological process: metabolic process (GO:0008152);; biological process: cellular process (GO:0009987)
gene-PARVB	14.4422	18.7836	12.139	22.6234	22.2211	23.3417	27.9016	23.4166	35.9685	17.521	37.0365	0.200666	0.536101	normal	0.0107726	0.715064	up	0.0646538	0.734642	normal	--	--	Molecular Function: actin binding (GO:0003779);; Cellular Component: focal adhesion (GO:0005925);; Biological Process: cell adhesion (GO:0007155);; Cellular Component: lamellipodium (GO:0030027);; Biological Process: lamellipodium assembly (GO:0030032);; Biological Process: actin cytoskeleton reorganization (GO:0031532);; Biological Process: establishment or maintenance of cell polarity regulatin…	K06275|0|chx:102175280|K06275 parvin | (RefSeq) PARVB; parvin beta	Focal adhesion (ko04510)	[Z]	Cytoskeleton	Calponin homology (CH) domain	--	Z	Cytoskeleton	PREDICTED: beta-parvin isoform X4 [Ovis aries musimon]	molecular function: binding (GO:0005488);; cellular component: cell junction (GO:0030054);; biological process: biological adhesion (GO:0022610);; cellular component: cell (GO:0005623);; cellular component: cell part (GO:0044464);; biological process: cellular process (GO:0009987);; biological process: single-organism process (GO:0044699);; biological process: cellular component organization or b…
gene-PDE7A	11.7498	8.64836	13.4008	11.8941	6.0959	22.817	18.6651	18.1655	8.39126	7.43799	9.97153	0.891385	-0.135725	normal	0.00193557	0.827816	up	0.532693	-0.281752	normal	--	--	Molecular Function: 3',5'-cyclic-AMP phosphodiesterase activity (GO:0004115);; Biological Process: signal transduction (GO:0007165);; Molecular Function: metal ion binding (GO:0046872);;	K18436|0|oas:101120417|K18436 high affinity cAMP-specific 3',5'-cyclic phosphodiesterase 7 [EC:3.1.4.53] | (RefSeq) PDE7A; phosphodiesterase 7A	Purine metabolism (ko00230);; Morphine addiction (ko05032)	[T]	Signal transduction mechanisms	3'5'-cyclic nucleotide phosphodiesterase	Calcium/calmodulin-dependent 3&apos;,5&apos;-cyclic nucleotide phosphodiesterase 1B OS=Bos taurus OX=9913 GN=PDE1B PE=1 SV=1	T	Signal transduction mechanisms	PREDICTED: high affinity cAMP-specific 3&apos;,5&apos;-cyclic phosphodiesterase 7A isoform X1 [Ovis aries]	molecular function: catalytic activity (GO:0003824);; biological process: cellular process (GO:0009987);; biological process: biological regulation (GO:0065007);; molecular function: binding (GO:0005488)
gene-PER1	20.8644	10.0734	24.3524	22.6338	19.3933	42.7649	32.9827	45.954	16.8023	15.9708	12.3925	0.783952	0.22712	normal	0.0032309	0.971869	up	0.793448	-0.177261	normal	--	--	Biological Process: negative regulation of transcription from RNA polymerase II promoter (GO:0000122);; Molecular Function: RNA polymerase II core promoter proximal region sequence-specific DNA binding (GO:0000978);; Molecular Function: transcription factor activity, transcription factor binding (GO:0000989);; Biological Process: regulation of sodium ion transport (GO:0002028);; Cellular Componen…	K02633|0|bta:516318|K02633 period circadian protein | (RefSeq) PER1, Rigui-like; period circadian clock 1	Circadian rhythm (ko04710);; Circadian entrainment (ko04713);; Herpes simplex infection (ko05168)	[T]	Signal transduction mechanisms	Period protein 2/3C-terminal region;; PAS fold;; PAS domain;; PAS fold	Aryl hydrocarbon receptor nuclear translocator-like protein 1 OS=Pongo abelii OX=9601 GN=ARNTL PE=2 SV=1	K	Transcription	PREDICTED: period circadian protein homolog 1 isoform X2 [Ovis aries musimon]	biological process: biological regulation (GO:0065007);; molecular function: binding (GO:0005488);; molecular function: transcription factor activity, protein binding (GO:0000988);; cellular component: cell (GO:0005623);; cellular component: organelle (GO:0043226);; cellular component: cell part (GO:0044464);; biological process: multicellular organismal process (GO:0032501);; biological process:…
gene-PER2	3.04756	2.05719	2.39978	3.54868	2.26074	7.49523	3.36963	6.63425	1.86878	1.60407	1.40384	0.727264	0.25299	normal	0.00684785	0.967525	up	0.216963	-0.478537	normal	--	--	--	K02633|0|chx:102178971|K02633 period circadian protein | (RefSeq) PER2; period circadian clock 2	Circadian rhythm (ko04710);; Circadian entrainment (ko04713);; Herpes simplex infection (ko05168)	[T]	Signal transduction mechanisms	Period protein 2/3C-terminal region;; PAS fold;; PAS domain;; PAS fold	Aryl hydrocarbon receptor nuclear translocator-like protein 1 OS=Equus caballus OX=9796 GN=ARNTL PE=2 SV=1	K	Transcription	PREDICTED: period circadian protein homolog 2 isoform X2 [Ovis aries musimon]	--
gene-PFKFB3	83.6033	105.245	139.866	347.846	144.184	352.901	167.845	358.469	36.5091	65.9712	144.37	0.0518362	0.83141	normal	0.000651943	1.12026	up	0.880763	-0.124449	normal	[E]	Amino acid transport and metabolism	Molecular Function: 6-phosphofructo-2-kinase activity (GO:0003873);; Molecular Function: fructose-2,6-bisphosphate 2-phosphatase activity (GO:0004331);; Molecular Function: ATP binding (GO:0005524);; Cellular Component: nucleoplasm (GO:0005654);; Biological Process: fructose metabolic process (GO:0006000);; Biological Process: fructose 2,6-bisphosphate metabolic process (GO:0006003);; Biological …	K01103|0|bta:407183|K01103 6-phosphofructo-2-kinase / fructose-2,6-biphosphatase 3&#160; [EC:2.7.1.105 3.1.3.46] | (RefSeq) PFKFB3; 6-phosphofructo-2-kinase/fructose-2,6-biphosphatase 3	Fructose and mannose metabolism (ko00051);; HIF-1 signaling pathway (ko04066);; AMPK signaling pathway (ko04152)	[G]	Carbohydrate transport and metabolism	6-phosphofructo-2-kinase;; Histidine phosphatase superfamily (branch 1);; AAA domain;; Chromatin associated protein KTI12	6-phosphofructo-2-kinase/fructose-2,6-bisphosphatase 3 OS=Pongo abelii OX=9601 GN=PFKFB3 PE=2 SV=2	G	Carbohydrate transport and metabolism	PREDICTED: 6-phosphofructo-2-kinase/fructose-2,6-bisphosphatase 3 isoform X8 [Capra hircus]	molecular function: catalytic activity (GO:0003824);; biological process: metabolic process (GO:0008152);; biological process: cellular process (GO:0009987);; molecular function: binding (GO:0005488);; cellular component: cell (GO:0005623);; cellular component: organelle (GO:0043226);; cellular component: organelle part (GO:0044422);; cellular component: cell part (GO:0044464);; biological proces…
gene-PGPEP1L	1.72864	2.88835	3.75906	2.529	2.42118	8.10707	3.62337	7.06666	2.37199	3.45092	3.44577	0.931059	0.0928716	normal	0.0428317	0.852081	up	0.730343	0.23374	normal	--	--	Biological Process: proteolysis (GO:0006508);;	--	--	[O]	Posttranslational modification, protein turnover, chaperones	Pyroglutamyl peptidase	--	O	Posttranslational modification, protein turnover, chaperones	PREDICTED: pyroglutamyl-peptidase 1-like protein isoform X2 [Ovis aries]	biological process: metabolic process (GO:0008152)
gene-PLCL2	20.7202	21.1589	27.304	42.9265	41.1204	33.5626	20.0339	36.6752	33.0355	24.5093	41.9597	2.86e-05	0.874519	up	0.405492	0.429307	normal	0.245738	0.463286	normal	--	--	Biological Process: B cell proliferation involved in immune response (GO:0002322);; Biological Process: B-1a B cell differentiation (GO:0002337);; Molecular Function: phosphatidylinositol phospholipase C activity (GO:0004435);; Molecular Function: signal transducer activity (GO:0004871);; Cellular Component: intracellular (GO:0005622);; Biological Process: gamma-aminobutyric acid signaling pathwa…	K15370|0|chx:102183272|K15370 inactive phospholipase C-like protein 2 | (RefSeq) PLCL2; phospholipase C like 2	--	[T]	Signal transduction mechanisms	Phosphatidylinositol-specific phospholipase C, X domain;; Phosphatidylinositol-specific phospholipase C, Y domain;; Pleckstrin homology domain;; C2 domain;; Phosphoinositide-specific phospholipase C, efhand-like;; PH domain	1-phosphatidylinositol 4,5-bisphosphate phosphodiesterase delta-4 OS=Pongo abelii OX=9601 GN=PLCD4 PE=2 SV=1	S	Function unknown	PREDICTED: inactive phospholipase C-like protein 2 isoform X2 [Ovis aries musimon]	biological process: immune system process (GO:0002376);; biological process: cellular process (GO:0009987);; biological process: single-organism process (GO:0044699);; biological process: response to stimulus (GO:0050896);; biological process: multicellular organismal process (GO:0032501);; biological process: developmental process (GO:0032502);; molecular function: catalytic activity (GO:0003824…
gene-PLEK	0.32992	0.138068	0.206228	0.573622	0.823559	1.52859	0.780997	0.453621	0.207439	0.118531	0.235964	0.0746195	0.819613	normal	0.0156722	0.970558	up	--	--	--	--	--	Biological Process: hematopoietic progenitor cell differentiation (GO:0002244);; Molecular Function: protein kinase C binding (GO:0005080);; Cellular Component: cytoplasm (GO:0005737);; Biological Process: vesicle docking involved in exocytosis (GO:0006904);; Biological Process: integrin-mediated signaling pathway (GO:0007229);; Biological Process: positive regulation of platelet activation (GO:0…	K19993|0|oas:101110218|K19993 pleckstrin | (RefSeq) PLEK; pleckstrin	--	--	--	PH domain;; Domain found in Dishevelled, Egl-10, and Pleckstrin (DEP);; Pleckstrin homology domain;; Pleckstrin homology domain;; Pleckstrin homology domain	Pleckstrin OS=Canis lupus familiaris OX=9615 GN=PLEK PE=2 SV=1	U	Intracellular trafficking, secretion, and vesicular transport	PREDICTED: pleckstrin [Ovis aries]	biological process: cellular process (GO:0009987);; biological process: developmental process (GO:0032502);; biological process: single-organism process (GO:0044699);; molecular function: binding (GO:0005488);; cellular component: cell (GO:0005623);; cellular component: cell part (GO:0044464);; biological process: localization (GO:0051179);; biological process: signaling (GO:0023052);; biological…
gene-PLIN5	29.2688	29.8982	33.4728	42.4406	59.315	28.0047	67.1637	42.8426	45.5528	65.4365	68.2924	0.00142848	0.7362	up	0.1733	0.531721	normal	0.00230702	0.772084	up	--	--	Cellular Component: mitochondrion (GO:0005739);; Cellular Component: lipid droplet (GO:0005811);; Cellular Component: cytosol (GO:0005829);; Biological Process: positive regulation of triglyceride biosynthetic process (GO:0010867);; Biological Process: positive regulation of sequestering of triglyceride (GO:0010890);; Biological Process: negative regulation of triglyceride catabolic process (GO:0…	K20255|0|oas:100135434|K20255 perilipin-5 | (RefSeq) PLIN5, LSDP5; perilipin 5	PPAR signaling pathway (ko03320)	--	--	Perilipin family	Perilipin-5 OS=Ovis aries OX=9940 GN=Plin5 PE=2 SV=1	S	Function unknown	perilipin-5 [Ovis aries]	cellular component: cell (GO:0005623);; cellular component: organelle (GO:0043226);; cellular component: cell part (GO:0044464);; biological process: biological regulation (GO:0065007);; biological process: cellular process (GO:0009987);; biological process: cellular component organization or biogenesis (GO:0071840);; molecular function: binding (GO:0005488);; biological process: localization (GO…
gene-PNPLA2	68.557	83.6691	92.8238	99.57	136.257	82.0529	167.81	116.659	116.115	151.8	127.348	0.129443	0.540033	normal	0.0765182	0.579117	normal	0.0386787	0.626675	up	--	--	Molecular Function: triglyceride lipase activity (GO:0004806);; Cellular Component: lipid droplet (GO:0005811);; Cellular Component: cytosol (GO:0005829);; Cellular Component: plasma membrane (GO:0005886);; Biological Process: negative regulation of sequestering of triglyceride (GO:0010891);; Biological Process: positive regulation of triglyceride catabolic process (GO:0010898);; Cellular Compone…	K16816|0|chx:100860889|K16816 patatin-like phospholipase domain-containing protein 2 [EC:3.1.1.3] | (RefSeq) PNPLA2, ATGL; patatin like phospholipase domain containing 2	Glycerolipid metabolism (ko00561);; Regulation of lipolysis in adipocytes (ko04923)	[U]	Intracellular trafficking, secretion, and vesicular transport	Patatin-like phospholipase	Patatin-like phospholipase domain-containing protein 2 OS=Bos taurus OX=9913 GN=PNPLA2 PE=2 SV=1	S	Function unknown	patatin-like phospholipase domain-containing protein 2 [Capra hircus]	molecular function: catalytic activity (GO:0003824);; cellular component: cell (GO:0005623);; cellular component: organelle (GO:0043226);; cellular component: cell part (GO:0044464);; cellular component: membrane (GO:0016020);; biological process: biological regulation (GO:0065007);; cellular component: membrane part (GO:0044425);; biological process: cellular process (GO:0009987);; biological pr…
gene-PPP1R27	454.555	418.559	533.68	748.914	758.246	393.765	824.744	407.288	962.58	635.251	752.171	2.86e-05	0.741743	up	0.638688	0.256241	normal	0.00549105	0.683691	up	[D]	Cell cycle control, cell division, chromosome partitioning	Biological Process: negative regulation of phosphatase activity (GO:0010923);; Molecular Function: phosphatase binding (GO:0019902);;	K17566|1.50005e-89|phd:102341463|K17566 protein phosphatase 1 regulatory subunit 27 | (RefSeq) PPP1R27; protein phosphatase 1 regulatory subunit 27	--	[OT]	Posttranslational modification, protein turnover, chaperones;; Signal transduction mechanisms	Ankyrin repeats (many copies);; Ankyrin repeats (3 copies);; Ankyrin repeats (many copies);; Ankyrin repeat;; Ankyrin repeat	Protein phosphatase 1 regulatory inhibitor subunit 16B OS=Bos taurus OX=9913 GN=PPP1R16B PE=1 SV=1	S	Function unknown	PREDICTED: protein phosphatase 1 regulatory subunit 27 [Bubalus bubalis]	biological process: biological regulation (GO:0065007);; molecular function: binding (GO:0005488)
gene-PPTC7	25.5446	22.8157	22.7025	33.2077	40.4187	13.2283	23.7331	18.2934	58.5634	30.1668	25.3697	0.0010396	0.681267	up	0.618352	-0.221011	normal	0.209496	0.534055	normal	--	--	Molecular Function: catalytic activity (GO:0003824);; Cellular Component: mitochondrion (GO:0005739);;	K17508|0|tup:102475899|K17508 protein phosphatase PTC7 [EC:3.1.3.16] | (RefSeq) PPTC7; PTC7 protein phosphatase homolog	--	[T]	Signal transduction mechanisms	Stage II sporulation protein E (SpoIIE);; Protein phosphatase 2C;; Protein phosphatase 2C	--	T	Signal transduction mechanisms	protein phosphatase PTC7 homolog [Sus scrofa]	molecular function: catalytic activity (GO:0003824);; cellular component: cell (GO:0005623);; cellular component: organelle (GO:0043226);; cellular component: cell part (GO:0044464)
gene-RAMP1	5.62972	9.22383	5.2939	5.62886	11.7125	10.918	13.6918	12.6836	4.83266	15.0959	2.60568	0.757005	0.263344	normal	0.0336108	0.760793	up	0.929845	0.0845182	normal	--	--	Biological Process: angiogenesis (GO:0001525);; Molecular Function: calcitonin receptor activity (GO:0004948);; Cellular Component: intracellular (GO:0005622);; Cellular Component: plasma membrane (GO:0005886);; Biological Process: calcium ion transport (GO:0006816);; Biological Process: intracellular protein transport (GO:0006886);; Biological Process: regulation of G-protein coupled receptor pr…	K08447|7.58597e-76|bta:617017|K08447 receptor activity modifying protein 1 | (RefSeq) RAMP1; receptor activity modifying protein 1	Vascular smooth muscle contraction (ko04270)	--	--	Receptor activity modifying family	Receptor activity-modifying protein 1 OS=Sus scrofa OX=9823 GN=RAMP1 PE=2 SV=1	U	Intracellular trafficking, secretion, and vesicular transport	PREDICTED: LOW QUALITY PROTEIN: receptor activity-modifying protein 1 [Bubalus bubalis]	biological process: developmental process (GO:0032502);; biological process: single-organism process (GO:0044699);; molecular function: signal transducer activity (GO:0004871);; molecular function: molecular transducer activity (GO:0060089);; biological process: cellular process (GO:0009987);; biological process: signaling (GO:0023052);; biological process: response to stimulus (GO:0050896);; bio…
gene-RASD1	60.5543	16.2483	60.5144	111.605	72.2237	165.039	126.617	114.501	27.44	70.1152	66.1181	0.530942	0.397723	normal	0.00242846	1.08972	up	0.889059	0.115475	normal	--	--	Molecular Function: GTP binding (GO:0005525);; Biological Process: small GTPase mediated signal transduction (GO:0007264);; Cellular Component: membrane (GO:0016020);; Cellular Component: sarcoplasmic reticulum (GO:0016529);;	K07843|0|phd:102343378|K07843 RAS, dexamethasone-induced Ras-related protein 1 | (RefSeq) RASD1; ras related dexamethasone induced 1	Circadian entrainment (ko04713)	[R]	General function prediction only	Ras family;; Ras of Complex, Roc, domain of DAPkinase;; ADP-ribosylation factor family	GTP-binding protein Di-Ras2 OS=Pongo abelii OX=9601 GN=DIRAS2 PE=2 SV=1	S	Function unknown	PREDICTED: dexamethasone-induced Ras-related protein 1 [Pantholops hodgsonii]	molecular function: binding (GO:0005488);; biological process: cellular process (GO:0009987);; biological process: signaling (GO:0023052);; biological process: single-organism process (GO:0044699);; biological process: response to stimulus (GO:0050896);; biological process: biological regulation (GO:0065007);; cellular component: membrane (GO:0016020);; cellular component: cell (GO:0005623);; cel…
gene-RASGEF1B	1.13819	1.14448	1.07601	1.6205	1.83506	2.09394	1.97625	1.88241	0.6372	1.29146	1.05916	0.17468	0.573336	normal	0.0083264	0.788831	up	0.93747	-0.0751759	normal	[F]	Nucleotide transport and metabolism	Molecular Function: Ras guanyl-nucleotide exchange factor activity (GO:0005088);; Cellular Component: early endosome (GO:0005769);; Cellular Component: late endosome (GO:0005770);; Biological Process: small GTPase mediated signal transduction (GO:0007264);; Cellular Component: midbody (GO:0030496);; Biological Process: positive regulation of GTPase activity (GO:0043547);;	--	--	[T]	Signal transduction mechanisms	RasGEF domain;; RasGEF N-terminal motif	Ras-GEF domain-containing family member 1B OS=Bos taurus OX=9913 GN=RASGEF1B PE=2 SV=1	S	Function unknown	PREDICTED: ras-GEF domain-containing family member 1B isoform X1 [Capra hircus]	molecular function: molecular function regulator (GO:0098772);; biological process: biological regulation (GO:0065007);; cellular component: cell (GO:0005623);; cellular component: organelle (GO:0043226);; cellular component: cell part (GO:0044464);; biological process: cellular process (GO:0009987);; biological process: signaling (GO:0023052);; biological process: single-organism process (GO:004…
gene-REXO4	7.95465	8.80257	8.13438	13.5278	13.9054	5.24931	13.2356	9.17258	10.9935	14.7471	14.3206	0.00142848	0.742071	up	0.77907	0.194613	normal	0.065362	0.608866	normal	--	--	Cellular Component: nucleolus (GO:0005730);; Molecular Function: RNA binding (GO:0044822);;	K18327|0|chx:106502675|K18327 RNA exonuclease 4 [EC:3.1.-.-] | (RefSeq) REXO4; REX4 homolog, 3'-5' exonuclease	--	[L]	Replication, recombination and repair	Exonuclease	Apoptosis-enhancing nuclease OS=Pongo abelii OX=9601 GN=AEN PE=2 SV=1	L	Replication, recombination and repair	PREDICTED: RNA exonuclease 4 isoform X2 [Ovis aries musimon]	cellular component: cell (GO:0005623);; cellular component: organelle (GO:0043226);; cellular component: organelle part (GO:0044422);; cellular component: cell part (GO:0044464)
gene-RHBDD3	1.2319	1.53497	1.15083	1.4946	1.81099	3.03682	3.72812	2.82895	1.5433	3.19577	2.28521	0.327639	0.475667	normal	0.000618347	0.913655	up	0.260503	0.522342	normal	--	--	Biological Process: MAPK cascade (GO:0000165);; Biological Process: liver development (GO:0001889);; Biological Process: regulation of acute inflammatory response (GO:0002673);; Molecular Function: serine-type endopeptidase activity (GO:0004252);; Cellular Component: intracellular (GO:0005622);; Biological Process: proteolysis (GO:0006508);; Biological Process: response to xenobiotic stimulus (GO…	--	--	[S]	Function unknown	Rhomboid family;; UBA/TS-N domain	--	S	Function unknown	PREDICTED: rhomboid domain-containing protein 3 isoform X1 [Bubalus bubalis]	biological process: metabolic process (GO:0008152);; biological process: cellular process (GO:0009987);; biological process: signaling (GO:0023052);; biological process: single-organism process (GO:0044699);; biological process: response to stimulus (GO:0050896);; biological process: biological regulation (GO:0065007);; biological process: multicellular organismal process (GO:0032501);; biologica…
gene-RORC	7.97007	8.08687	9.26122	10.7674	9.17034	23.7337	11.9009	13.4439	3.11332	8.43739	6.20996	0.467359	0.30123	normal	0.0230067	0.825113	up	0.612565	-0.307758	normal	--	--	Molecular Function: steroid hormone receptor activity (GO:0003707);; Molecular Function: RNA polymerase II transcription factor activity, ligand-activated sequence-specific DNA binding (GO:0004879);; Cellular Component: nucleolus (GO:0005730);; Biological Process: regulation of transcription, DNA-templated (GO:0006355);; Molecular Function: oxysterol binding (GO:0008142);; Molecular Function: zin…	K08534|0|chx:100860876|K08534 RAR-related orphan receptor gamma | (RefSeq) RORC; RAR related orphan receptor C	Circadian rhythm (ko04710);; Inflammatory bowel disease (IBD) (ko05321)	[K]	Transcription	Ligand-binding domain of nuclear hormone receptor	Nuclear receptor ROR-gamma OS=Pongo abelii OX=9601 GN=RORC PE=2 SV=1	S	Function unknown	PREDICTED: nuclear receptor ROR-gamma isoform X1 [Ovis aries musimon]	molecular function: signal transducer activity (GO:0004871);; molecular function: molecular transducer activity (GO:0060089);; biological process: cellular process (GO:0009987);; biological process: signaling (GO:0023052);; biological process: single-organism process (GO:0044699);; biological process: response to stimulus (GO:0050896);; biological process: biological regulation (GO:0065007);; mol…
gene-RPS3	157.018	192.305	204.297	261.921	309.915	137.324	239.246	188.391	164.64	206.028	136.491	0.0150445	0.650363	up	0.83918	0.126043	normal	0.913516	-0.0734835	normal	[J]	Translation, ribosomal structure and biogenesis	Molecular Function: mRNA binding (GO:0003729);; Molecular Function: structural constituent of ribosome (GO:0003735);; Cellular Component: nucleolus (GO:0005730);; Cellular Component: mitochondrial inner membrane (GO:0005743);; Cellular Component: mitochondrial matrix (GO:0005759);; Cellular Component: polysome (GO:0005844);; Cellular Component: focal adhesion (GO:0005925);; Biological Process: ch…	K02985|7.51451e-175|ssc:733671|K02985 small subunit ribosomal protein S3e | (RefSeq) RPS3; ribosomal protein S3	Ribosome (ko03010)	[J]	Translation, ribosomal structure and biogenesis	Ribosomal protein S3, C-terminal domain;; KH domain	40S ribosomal protein S3 OS=Sus scrofa OX=9823 GN=RPS3 PE=1 SV=1	J	Translation, ribosomal structure and biogenesis	40S ribosomal protein S3 [Equus caballus]	molecular function: binding (GO:0005488);; molecular function: structural molecule activity (GO:0005198);; cellular component: cell (GO:0005623);; cellular component: organelle (GO:0043226);; cellular component: organelle part (GO:0044422);; cellular component: cell part (GO:0044464);; cellular component: membrane (GO:0016020);; cellular component: membrane-enclosed lumen (GO:0031974);; cellular …
gene-RRP1B	3.53083	2.65807	3.59888	4.01642	3.50384	4.42498	5.17818	4.64001	3.59215	2.94677	4.14762	0.616626	0.266588	normal	0.00872249	0.627711	up	0.782639	0.16344	normal	--	--	Cellular Component: euchromatin (GO:0000791);; Cellular Component: heterochromatin (GO:0000792);; Cellular Component: nucleolus (GO:0005730);; Cellular Component: cytosol (GO:0005829);; Biological Process: rRNA processing (GO:0006364);; Biological Process: negative regulation of phosphatase activity (GO:0010923);; Cellular Component: preribosome, large subunit precursor (GO:0030687);; Cellular Co…	K14849|0|phd:102334202|K14849 ribosomal RNA-processing protein 1 | (RefSeq) RRP1B; ribosomal RNA processing 1B	--	[A]	RNA processing and modification	Nucleolar protein,Nop52	--	J	Translation, ribosomal structure and biogenesis	PREDICTED: ribosomal RNA processing protein 1 homolog B isoform X4 [Ovis aries musimon]	cellular component: cell (GO:0005623);; cellular component: organelle (GO:0043226);; cellular component: organelle part (GO:0044422);; cellular component: cell part (GO:0044464);; biological process: metabolic process (GO:0008152);; biological process: cellular process (GO:0009987);; biological process: biological regulation (GO:0065007);; cellular component: macromolecular complex (GO:0032991)
gene-RRS1	3.80327	2.68431	4.42337	3.28077	5.48766	4.88044	9.31072	5.65201	10.7456	3.9598	8.47641	0.702037	0.277242	normal	0.0168353	0.780115	up	0.0793934	0.744886	normal	--	--	Biological Process: ribosomal large subunit export from nucleus (GO:0000055);; Biological Process: endonucleolytic cleavage in ITS1 to separate SSU-rRNA from 5.8S rRNA and LSU-rRNA from tricistronic rRNA transcript (SSU-rRNA, 5.8S rRNA, LSU-rRNA) (GO:0000447);; Cellular Component: condensed nuclear chromosome (GO:0000794);; Biological Process: hematopoietic progenitor cell differentiation (GO:000…	K14852|0|bom:102273399|K14852 regulator of ribosome biosynthesis | (RefSeq) RRS1; ribosome biogenesis regulator homolog	--	[J]	Translation, ribosomal structure and biogenesis	Ribosome biogenesis regulatory protein (RRS1)	Ribosome biogenesis regulatory protein homolog OS=Bos taurus OX=9913 GN=RRS1 PE=2 SV=1	J	Translation, ribosomal structure and biogenesis	PREDICTED: ribosome biogenesis regulatory protein homolog [Ovis aries musimon]	biological process: localization (GO:0051179);; biological process: cellular component organization or biogenesis (GO:0071840);; biological process: metabolic process (GO:0008152);; biological process: cellular process (GO:0009987);; cellular component: cell (GO:0005623);; cellular component: membrane-enclosed lumen (GO:0031974);; cellular component: organelle (GO:0043226);; cellular component: o…
gene-SERPINE1	0.958583	0.760562	0.378592	3.18408	1.05984	4.56724	2.56302	2.29805	0.498839	0.384097	2.48534	0.188124	0.660735	normal	0.000423186	1.24741	up	0.747322	0.217054	normal	[O]	Posttranslational modification, protein turnover, chaperones	Biological Process: chronological cell aging (GO:0001300);; Molecular Function: protease binding (GO:0002020);; Molecular Function: serine-type endopeptidase inhibitor activity (GO:0004867);; Molecular Function: receptor binding (GO:0005102);; Cellular Component: extracellular space (GO:0005615);; Biological Process: regulation of receptor activity (GO:0010469);; Biological Process: negative regu…	K03982|0|chx:102169375|K03982 plasminogen activator inhibitor 1 | (RefSeq) SERPINE1; serpin family E member 1	HIF-1 signaling pathway (ko04066);; p53 signaling pathway (ko04115);; Hippo signaling pathway (ko04390);; Complement and coagulation cascades (ko04610);; AGE-RAGE signaling pathway in diabetic complications (ko04933);; Chagas disease (American trypanosomiasis) (ko05142)	[V]	Defense mechanisms	Serpin (serine protease inhibitor)	Plasminogen activator inhibitor 1 OS=Bos taurus OX=9913 GN=SERPINE1 PE=1 SV=1	O	Posttranslational modification, protein turnover, chaperones	PREDICTED: plasminogen activator inhibitor 1 isoform X1 [Ovis aries]	biological process: cellular process (GO:0009987);; biological process: developmental process (GO:0032502);; biological process: single-organism process (GO:0044699);; molecular function: binding (GO:0005488);; molecular function: molecular function regulator (GO:0098772);; biological process: biological regulation (GO:0065007);; cellular component: extracellular region (GO:0005576);; cellular co…
gene-SESN1	74.1289	57.2532	98.7799	64.5979	43.5515	161.069	110.747	126.849	52.9261	77.9097	71.5215	0.643106	-0.285008	normal	0.0210812	0.737965	up	0.888573	-0.0942763	normal	--	--	Cellular Component: nucleus (GO:0005634);; Biological Process: regulation of response to reactive oxygen species (GO:1901031);;	K10141|0|phd:102344350|K10141 sestrin 1/3 | (RefSeq) SESN1; sestrin 1	p53 signaling pathway (ko04115);; Longevity regulating pathway (ko04211)	[S]	Function unknown	PA26 p53-induced protein (sestrin)	Sestrin-1 OS=Macaca fascicularis OX=9541 GN=SESN1 PE=2 SV=1	S	Function unknown	PREDICTED: sestrin-1 isoform X1 [Ovis aries]	cellular component: cell (GO:0005623);; cellular component: organelle (GO:0043226);; cellular component: cell part (GO:0044464);; biological process: biological regulation (GO:0065007)
gene-SGK1	3.90411	4.37694	3.79931	17.47	9.98091	11.7949	6.4928	4.74862	3.33191	6.40306	2.55564	1.42e-06	1.33886	up	0.116022	0.688402	normal	0.997458	0.00233001	normal	[T]	Signal transduction mechanisms	Biological Process: regulation of cell growth (GO:0001558);; Molecular Function: protein serine/threonine kinase activity (GO:0004674);; Molecular Function: protein serine/threonine/tyrosine kinase activity (GO:0004712);; Molecular Function: calcium channel regulator activity (GO:0005246);; Molecular Function: ATP binding (GO:0005524);; Cellular Component: nucleoplasm (GO:0005654);; Cellular Comp…	K13302|0|pale:102891704|K13302 serum/glucocorticoid-regulated kinase 1 [EC:2.7.11.1] | (RefSeq) SGK1; serine/threonine-protein kinase Sgk1	FoxO signaling pathway (ko04068);; mTOR signaling pathway (ko04150);; PI3K-Akt signaling pathway (ko04151);; Aldosterone-regulated sodium reabsorption (ko04960)	[RT]	General function prediction only;; Signal transduction mechanisms	Protein kinase domain;; Protein tyrosine kinase;; Protein kinase C terminal domain;; Kinase-like	Serine/threonine-protein kinase Sgk1 OS=Bos taurus OX=9913 GN=SGK1 PE=2 SV=1	T	Signal transduction mechanisms	PREDICTED: serine/threonine-protein kinase Sgk1 isoform X2 [Bos taurus]	biological process: biological regulation (GO:0065007);; molecular function: catalytic activity (GO:0003824);; biological process: metabolic process (GO:0008152);; biological process: cellular process (GO:0009987);; molecular function: molecular function regulator (GO:0098772);; molecular function: binding (GO:0005488);; cellular component: cell (GO:0005623);; cellular component: organelle (GO:00…
gene-SH3KBP1	3.76402	4.3583	2.20219	4.77053	5.5485	6.33892	5.2162	9.12246	7.31494	6.17542	2.09192	0.501529	0.403735	normal	0.0291551	0.827841	up	0.560978	0.354462	normal	--	--	Cellular Component: cell-cell junction (GO:0005911);; Biological Process: cytoskeleton organization (GO:0007010);; Biological Process: regulation of cell shape (GO:0008360);; Molecular Function: kinase activity (GO:0016301);; Biological Process: phosphorylation (GO:0016310);; Biological Process: cell migration (GO:0016477);; Cellular Component: endocytic vesicle (GO:0030139);;	K12470|0|bta:510489|K12470 SH3 domain-containing kinase-binding protein 1 | (RefSeq) SH3KBP1; SH3 domain containing kinase binding protein 1	Endocytosis (ko04144)	[T]	Signal transduction mechanisms	Variant SH3 domain;; Variant SH3 domain;; SH3 domain	SH3 domain-containing protein 21 OS=Macaca fascicularis OX=9541 GN=SH3D21 PE=2 SV=1	S	Function unknown	PREDICTED: SH3 domain-containing kinase-binding protein 1 isoform X9 [Ovis aries musimon]	cellular component: cell junction (GO:0030054);; biological process: cellular process (GO:0009987);; biological process: cellular component organization or biogenesis (GO:0071840);; biological process: biological regulation (GO:0065007);; molecular function: catalytic activity (GO:0003824);; biological process: metabolic process (GO:0008152);; biological process: locomotion (GO:0040011);; biologi…
gene-SIK1	5.50054	4.85713	12.3304	30.7296	12.4524	11.8726	22.65	17.9012	10.5445	8.06198	9.91189	0.289726	0.560288	normal	0.00673938	0.950007	up	0.660089	0.270829	normal	[T]	Signal transduction mechanisms	Molecular Function: magnesium ion binding (GO:0000287);; Molecular Function: protein serine/threonine kinase activity (GO:0004674);; Molecular Function: ATP binding (GO:0005524);; Cellular Component: nucleus (GO:0005634);; Cellular Component: cytoplasm (GO:0005737);; Biological Process: protein phosphorylation (GO:0006468);; Biological Process: regulation of mitotic cell cycle (GO:0007346);; Mole…	K19008|0|phd:102333505|K19008 serine/threonine-protein kinase SIK1 [EC:2.7.11.1] | (RefSeq) SIK1; salt inducible kinase 1	Glucagon signaling pathway (ko04922)	[R]	General function prediction only	Protein kinase domain;; Protein tyrosine kinase;; Kinase-like	Serine/threonine-protein kinase SIK2 OS=Pongo abelii OX=9601 GN=SIK2 PE=2 SV=1	T	Signal transduction mechanisms	PREDICTED: serine/threonine-protein kinase SIK1 isoform X2 [Ovis aries musimon]	molecular function: binding (GO:0005488);; molecular function: catalytic activity (GO:0003824);; biological process: metabolic process (GO:0008152);; biological process: cellular process (GO:0009987);; cellular component: cell (GO:0005623);; cellular component: organelle (GO:0043226);; cellular component: cell part (GO:0044464);; biological process: biological regulation (GO:0065007);; biological…
gene-SLC16A3	81.2305	78.0044	90.0861	95.1263	137.918	30.9399	156.27	65.4086	190.498	108.543	132.201	0.124814	0.531797	normal	0.962117	0.0519899	normal	0.0204749	0.684528	up	--	--	Cellular Component: integral component of plasma membrane (GO:0005887);; Molecular Function: lactate transmembrane transporter activity (GO:0015129);; Cellular Component: actin cytoskeleton (GO:0015629);; Cellular Component: nuclear membrane (GO:0031965);; Biological Process: plasma membrane lactate transport (GO:0035879);; Molecular Function: RNA binding (GO:0044822);;	K08180|0|oas:101111643|K08180 MFS transporter, MCP family, solute carrier family 16 (monocarboxylic acid transporters), member 3 | (RefSeq) SLC16A3; solute carrier family 16 member 3	Central carbon metabolism in cancer (ko05230)	[G]	Carbohydrate transport and metabolism	Major Facilitator Superfamily	Monocarboxylate transporter 1 OS=Bos taurus OX=9913 GN=SLC16A1 PE=2 SV=2	G	Carbohydrate transport and metabolism	PREDICTED: monocarboxylate transporter 4 isoform X1 [Bos taurus]	cellular component: cell (GO:0005623);; cellular component: membrane (GO:0016020);; cellular component: membrane part (GO:0044425);; cellular component: cell part (GO:0044464);; molecular function: transporter activity (GO:0005215);; biological process: single-organism process (GO:0044699);; biological process: localization (GO:0051179);; cellular component: organelle (GO:0043226);; cellular comp…
gene-SLC19A2	1.37478	1.03358	1.19641	1.47405	4.17041	1.37668	2.35172	1.56749	2.95863	1.79133	2.30466	0.0999021	0.776442	normal	0.161811	0.54391	normal	0.0239045	0.776021	up	--	--	Cellular Component: integral component of plasma membrane (GO:0005887);; Molecular Function: thiamine uptake transmembrane transporter activity (GO:0015403);; Biological Process: thiamine transmembrane transport (GO:0071934);;	K14610|0|chx:102169784|K14610 solute carrier family 19 (thiamine transporter), member 2/3 | (RefSeq) SLC19A2; solute carrier family 19 member 2	Vitamin digestion and absorption (ko04977)	[H]	Coenzyme transport and metabolism	Reduced folate carrier;; Major Facilitator Superfamily	Thiamine transporter 2 OS=Macaca fascicularis OX=9541 GN=SLC19A3 PE=2 SV=1	P	Inorganic ion transport and metabolism	PREDICTED: thiamine transporter 1 isoform X3 [Ovis aries musimon]	cellular component: cell (GO:0005623);; cellular component: membrane (GO:0016020);; cellular component: membrane part (GO:0044425);; cellular component: cell part (GO:0044464);; molecular function: transporter activity (GO:0005215);; biological process: single-organism process (GO:0044699);; biological process: response to stimulus (GO:0050896);; biological process: localization (GO:0051179)
gene-SLC25A4	1972.65	1812.3	1637.28	2457.66	2919.31	1463.55	2670.22	1983.41	2799.49	3065.09	2598.45	0.0101815	0.614486	up	0.574392	0.250219	normal	0.00913481	0.611877	up	--	--	Molecular Function: structural constituent of ribosome (GO:0003735);; Molecular Function: transporter activity (GO:0005215);; Cellular Component: nucleus (GO:0005634);; Cellular Component: mitochondrial inner membrane (GO:0005743);; Biological Process: translation (GO:0006412);; Biological Process: apoptotic mitochondrial changes (GO:0008637);; Cellular Component: integral component of membrane (…	K05863|0|chx:100861351|K05863 solute carrier family 25 (mitochondrial adenine nucleotide translocator), member 4/5/6/31 | (RefSeq) SLC25A4; solute carrier family 25 member 4	Calcium signaling pathway (ko04020);; cGMP-PKG signaling pathway (ko04022);; Parkinson's disease (ko05012);; Huntington's disease (ko05016);; HTLV-I infection (ko05166)	[C]	Energy production and conversion	Mitochondrial carrier protein	ADP/ATP translocase 1 OS=Bos taurus OX=9913 GN=SLC25A4 PE=1 SV=3	U	Intracellular trafficking, secretion, and vesicular transport	ADP/ATP translocase 1 [Bos taurus]	molecular function: structural molecule activity (GO:0005198);; molecular function: transporter activity (GO:0005215);; cellular component: cell (GO:0005623);; cellular component: organelle (GO:0043226);; cellular component: cell part (GO:0044464);; cellular component: membrane (GO:0016020);; cellular component: organelle part (GO:0044422);; biological process: metabolic process (GO:0008152);; bi…
gene-SLC35G1	0.390502	0.294448	0.381421	0.762791	1.1239	0.250239	0.529678	0.180633	1.32441	0.422275	0.690955	0.0123142	0.967706	up	0.982296	-0.0258124	normal	0.209088	0.62953	normal	[GER]	Carbohydrate transport and metabolism;; Amino acid transport and metabolism;; General function prediction only	Cellular Component: endoplasmic reticulum membrane (GO:0005789);; Cellular Component: cytosol (GO:0005829);; Cellular Component: plasma membrane (GO:0005886);; Cellular Component: integral component of membrane (GO:0016021);; Biological Process: regulation of cytosolic calcium ion concentration (GO:0051480);; Biological Process: calcium ion export from cell (GO:1990034);;	--	--	[R]	General function prediction only	EamA-like transporter family	--	EG	Amino acid transport and metabolism;; Carbohydrate transport and metabolism	PREDICTED: solute carrier family 35 member G1 isoform X1 [Ovis aries musimon]	cellular component: cell (GO:0005623);; cellular component: membrane (GO:0016020);; cellular component: organelle (GO:0043226);; cellular component: organelle part (GO:0044422);; cellular component: membrane part (GO:0044425);; cellular component: cell part (GO:0044464);; biological process: cellular process (GO:0009987);; biological process: single-organism process (GO:0044699);; biological proc…
gene-SLC43A1	11.5293	9.67186	12.9712	12.0183	9.35671	16.7163	20.0037	17.0041	9.17728	11.0197	9.18599	0.978888	0.0262974	normal	4.35e-05	0.741957	up	0.759032	-0.152623	normal	--	--	Molecular Function: neutral amino acid transmembrane transporter activity (GO:0015175);; Biological Process: neutral amino acid transport (GO:0015804);; Cellular Component: integral component of membrane (GO:0016021);; Biological Process: transmembrane transport (GO:0055085);;	K08228|0|phd:102334551|K08228 MFS transporter, LAT3 family, solute carrier family 43, member 1 | (RefSeq) SLC43A1; solute carrier family 43 member 1	--	--	--	Major Facilitator Superfamily	Large neutral amino acids transporter small subunit 4 OS=Bos taurus OX=9913 GN=SLC43A2 PE=2 SV=1	U	Intracellular trafficking, secretion, and vesicular transport	PREDICTED: large neutral amino acids transporter small subunit 3 isoform X5 [Ovis aries musimon]	molecular function: transporter activity (GO:0005215);; biological process: single-organism process (GO:0044699);; biological process: localization (GO:0051179);; cellular component: membrane (GO:0016020);; cellular component: membrane part (GO:0044425)
gene-SPIDR	2.00626	2.78863	1.9586	2.80012	2.97241	3.5433	5.34598	3.28456	1.97199	2.68556	3.01171	0.561449	0.347211	normal	0.0184944	0.765908	up	0.820777	0.162922	normal	--	--	Cellular Component: nuclear chromosome (GO:0000228);; Cellular Component: nucleoplasm (GO:0005654);; Biological Process: regulation of double-strand break repair via homologous recombination (GO:0010569);; Biological Process: positive regulation of protein complex assembly (GO:0031334);; Biological Process: regulation of establishment of protein localization to chromosome (GO:0070202);; Biologica…	--	--	--	--	Domain of unknown function (DUF4502);; Domain of unknown function (DUF4503)	--	S	Function unknown	PREDICTED: DNA repair-scaffolding protein isoform X1 [Ovis aries]	cellular component: cell (GO:0005623);; cellular component: organelle (GO:0043226);; cellular component: organelle part (GO:0044422);; cellular component: cell part (GO:0044464);; biological process: biological regulation (GO:0065007);; biological process: cellular process (GO:0009987);; biological process: response to stimulus (GO:0050896)
gene-ST3GAL6	11.9208	10.2408	11.4231	14.4513	10.3049	17.9782	13.8763	20.0062	12.586	10.7447	15.2832	0.695472	0.224793	normal	0.0310683	0.660874	up	0.647623	0.212258	normal	--	--	Biological Process: ganglioside biosynthetic process (GO:0001574);; Molecular Function: beta-galactoside (CMP) alpha-2,3-sialyltransferase activity (GO:0003836);; Biological Process: oligosaccharide metabolic process (GO:0009311);; Biological Process: protein N-linked glycosylation via asparagine (GO:0018279);; Cellular Component: integral component of Golgi membrane (GO:0030173);; Molecular Func…	K03792|0|oas:101106812|K03792 beta-galactoside alpha-2,3-sialyltransferase (sialyltransferase 10) [EC:2.4.99.10] | (RefSeq) ST3GAL6; ST3 beta-galactoside alpha-2,3-sialyltransferase 6	Glycosphingolipid biosynthesis - lacto and neolacto series (ko00601)	[G]	Carbohydrate transport and metabolism	Glycosyltransferase family 29 (sialyltransferase)	Type 2 lactosamine alpha-2,3-sialyltransferase OS=Bos taurus OX=9913 GN=ST3GAL6 PE=2 SV=1	S	Function unknown	PREDICTED: type 2 lactosamine alpha-2,3-sialyltransferase [Ovis aries]	biological process: metabolic process (GO:0008152);; biological process: cellular process (GO:0009987);; biological process: single-organism process (GO:0044699);; molecular function: catalytic activity (GO:0003824);; cellular component: cell (GO:0005623);; cellular component: membrane (GO:0016020);; cellular component: organelle (GO:0043226);; cellular component: organelle part (GO:0044422);; ce…
gene-TANGO2	11.788	14.4136	10.7594	10.8093	12.0822	21.4813	27.0446	16.4734	26.3095	17.5309	13.9002	0.641698	0.262173	normal	0.00597906	0.779112	up	0.108246	0.660708	normal	[S]	Function unknown	--	--	--	[S]	Function unknown	Transport and Golgi organisation 2	Transport and Golgi organization protein 2 homolog OS=Bos taurus OX=9913 GN=TANGO2 PE=2 SV=1	S	Function unknown	PREDICTED: LOW QUALITY PROTEIN: transport and Golgi organization protein 2 homolog isoform X1 [Ovis aries]	--
gene-TIMM9	5.82274	6.97681	5.35339	10.2099	11.0263	4.5799	11.7375	4.70763	11.1605	5.89235	9.38012	0.0492876	0.715386	up	0.810333	0.197178	normal	0.423	0.406717	normal	--	--	Molecular Function: protein transporter activity (GO:0008565);; Cellular Component: mitochondrial intermembrane space protein transporter complex (GO:0042719);; Cellular Component: mitochondrial inner membrane protein insertion complex (GO:0042721);; Molecular Function: protein homodimerization activity (GO:0042803);; Biological Process: protein import into mitochondrial inner membrane (GO:004503…	K17777|1.23419e-56|umr:103673420|K17777 mitochondrial import inner membrane translocase subunit TIM9 | (RefSeq) TIMM9; translocase of inner mitochondrial membrane 9	--	[U]	Intracellular trafficking, secretion, and vesicular transport	Tim10/DDP family zinc finger	Mitochondrial import inner membrane translocase subunit Tim9 OS=Bos taurus OX=9913 GN=TIMM9 PE=3 SV=1	O	Posttranslational modification, protein turnover, chaperones	mitochondrial import inner membrane translocase subunit Tim9 [Canis lupus familiaris]	molecular function: transporter activity (GO:0005215);; biological process: localization (GO:0051179);; cellular component: cell (GO:0005623);; cellular component: macromolecular complex (GO:0032991);; cellular component: organelle (GO:0043226);; cellular component: organelle part (GO:0044422);; cellular component: cell part (GO:0044464);; cellular component: membrane (GO:0016020);; cellular comp…
gene-TMEM120A	20.2603	20.2552	12.6783	42.6118	44.3147	23.1805	77.982	24.1676	34.6328	52.5521	33.1442	0.000192297	1.08374	up	0.0508733	0.815539	normal	0.00553494	0.905584	up	--	--	Cellular Component: nuclear inner membrane (GO:0005637);; Cellular Component: integral component of membrane (GO:0016021);; Biological Process: fat cell differentiation (GO:0045444);; Biological Process: protein homooligomerization (GO:0051260);; Biological Process: protein heterooligomerization (GO:0051291);;	--	--	[R]	General function prediction only	TMPIT-like protein	Transmembrane protein 120A OS=Bos taurus OX=9913 GN=TMEM120A PE=2 SV=1	S	Function unknown	PREDICTED: transmembrane protein 120A isoform X2 [Capra hircus]	cellular component: cell (GO:0005623);; cellular component: membrane (GO:0016020);; cellular component: organelle (GO:0043226);; cellular component: organelle part (GO:0044422);; cellular component: cell part (GO:0044464);; cellular component: membrane part (GO:0044425);; biological process: cellular process (GO:0009987);; biological process: developmental process (GO:0032502);; biological proces…
gene-TNS3	3.23909	2.94061	3.85346	1.7708	1.70454	7.65572	2.49099	8.2162	2.18834	2.22132	2.29323	0.031042	-0.616939	down	0.0195121	0.852146	up	0.120685	-0.466287	normal	--	--	Cellular Component: cytoplasm (GO:0005737);; Cellular Component: focal adhesion (GO:0005925);; Biological Process: positive regulation of cell proliferation (GO:0008284);; Biological Process: cell migration (GO:0016477);; Biological Process: lung alveolus development (GO:0048286);;	K18080|0|oas:101113323|K18080 tensin | (RefSeq) TNS3; tensin 3	--	[TR]	Signal transduction mechanisms;; General function prediction only	Phosphotyrosine-binding domain;; C2 domain of PTEN tumour-suppressor protein;; SH2 domain;; Phorbol esters/diacylglycerol binding domain (C1 domain)	Tensin-1 OS=Bos taurus OX=9913 GN=TNS1 PE=2 SV=1	T	Signal transduction mechanisms	PREDICTED: tensin-3 isoform X2 [Ovis aries musimon]	cellular component: cell (GO:0005623);; cellular component: cell part (GO:0044464);; cellular component: cell junction (GO:0030054);; biological process: biological regulation (GO:0065007);; biological process: cellular process (GO:0009987);; biological process: locomotion (GO:0040011);; biological process: single-organism process (GO:0044699);; biological process: localization (GO:0051179);; bio…
gene-TP53INP2	18.1233	12.9309	17.0144	35.1246	54.925	5.49777	29.5718	13.5742	58.5474	18.7543	32.4376	1.26e-08	1.33038	up	0.96085	0.0565109	normal	0.0297894	0.841837	up	--	--	Biological Process: autophagosome assembly (GO:0000045);; Biological Process: osteoblast differentiation (GO:0001649);; Biological Process: tissue homeostasis (GO:0001894);; Cellular Component: nucleus (GO:0005634);; Cellular Component: autophagosome (GO:0005776);; Cellular Component: cytosol (GO:0005829);; Biological Process: ubiquitin-dependent protein catabolic process (GO:0006511);; Biologica…	K21247|1.72888e-88|chx:102174948|K21247 tumor protein p53-inducible nuclear protein 2 | (RefSeq) TP53INP2; tumor protein p53 inducible nuclear protein 2	--	--	--	DOR family	--	K	Transcription	PREDICTED: tumor protein p53-inducible nuclear protein 2 isoform X1 [Bos indicus]	biological process: metabolic process (GO:0008152);; biological process: cellular process (GO:0009987);; biological process: cellular component organization or biogenesis (GO:0071840);; biological process: developmental process (GO:0032502);; biological process: single-organism process (GO:0044699);; biological process: biological regulation (GO:0065007);; cellular component: cell (GO:0005623);; …
gene-TRIM63	152.996	72.9304	210.99	223.48	153.542	349.09	310.514	309.235	113.65	101.41	161.032	0.647915	0.329211	normal	0.00403823	0.965327	up	0.904462	-0.100714	normal	--	--	Cellular Component: cytoplasm (GO:0005737);; Molecular Function: zinc ion binding (GO:0008270);; Molecular Function: cation transmembrane transporter activity (GO:0008324);; Cellular Component: integral component of membrane (GO:0016021);; Molecular Function: ligase activity (GO:0016874);; Molecular Function: titin binding (GO:0031432);; Biological Process: cation transmembrane transport (GO:0098…	K10655|0|oas:101113132|K10655 tripartite motif-containing protein 63 [EC:2.3.2.27] | (RefSeq) TRIM63; tripartite motif containing 63	--	[O]	Posttranslational modification, protein turnover, chaperones	RING-type zinc-finger;; Zinc finger, C3HC4 type (RING finger);; Zinc finger, C3HC4 type (RING finger);; zinc-RING finger domain;; B-box zinc finger;; Ring finger domain	Tripartite motif-containing protein 54 OS=Bos taurus OX=9913 GN=TRIM54 PE=2 SV=1	O	Posttranslational modification, protein turnover, chaperones	PREDICTED: E3 ubiquitin-protein ligase TRIM63 isoform X1 [Ovis aries]	cellular component: cell (GO:0005623);; cellular component: cell part (GO:0044464);; molecular function: binding (GO:0005488);; molecular function: transporter activity (GO:0005215);; biological process: localization (GO:0051179);; cellular component: membrane (GO:0016020);; cellular component: membrane part (GO:0044425);; molecular function: catalytic activity (GO:0003824)
gene-TRPT1	7.31353	9.31771	7.10773	15.9117	19.6906	10.2875	19.2878	11.1049	21.1434	13.4234	11.8684	0.000491804	1.00671	up	0.0492385	0.689202	up	0.0441906	0.745786	up	[J]	Translation, ribosomal structure and biogenesis	Molecular Function: tRNA 2'-phosphotransferase activity (GO:0000215);; Biological Process: tRNA splicing, via endonucleolytic cleavage and ligation (GO:0006388);; Biological Process: regulation of protein kinase activity (GO:0045859);;	K10669|6.57415e-165|oas:101122992|K10669 2'-phosphotransferase [EC:2.7.1.160] | (RefSeq) TRPT1; tRNA phosphotransferase 1	--	[J]	Translation, ribosomal structure and biogenesis	RNA 2'-phosphotransferase, Tpt1 / KptA family	tRNA 2&apos;-phosphotransferase 1 OS=Bos taurus OX=9913 GN=TRPT1 PE=2 SV=3	J	Translation, ribosomal structure and biogenesis	PREDICTED: tRNA 2&apos;-phosphotransferase 1 [Ovis aries]	molecular function: catalytic activity (GO:0003824);; biological process: metabolic process (GO:0008152);; biological process: cellular process (GO:0009987);; biological process: biological regulation (GO:0065007)
gene-UFSP1	1.81637	2.04592	2.05522	1.9321	1.77967	4.62929	5.18023	3.13098	3.19105	1.99343	3.69337	0.991166	0.0146848	normal	0.00423164	0.940367	up	0.469285	0.403446	normal	--	--	Biological Process: proteolysis (GO:0006508);; Molecular Function: thiolester hydrolase activity (GO:0016790);; Cellular Component: extracellular exosome (GO:0070062);; Molecular Function: UFM1 hydrolase activity (GO:0071567);;	--	--	[S]	Function unknown	Peptidase family C78	Ufm1-specific protease 2 OS=Pongo abelii OX=9601 GN=UFSP2 PE=2 SV=3	O	Posttranslational modification, protein turnover, chaperones	Ufm1-specific protease 1, partial [Bos mutus]	biological process: metabolic process (GO:0008152);; molecular function: catalytic activity (GO:0003824);; cellular component: extracellular region (GO:0005576);; cellular component: organelle (GO:0043226);; cellular component: extracellular region part (GO:0044421)
gene-VEGFB	33.6484	34.0249	26.3239	39.47	49.5981	47.2078	42.8508	47.7558	41.1948	40.3816	34.9772	0.169957	0.509857	normal	0.0475797	0.587	up	0.477782	0.281072	normal	--	--	Biological Process: positive regulation of endothelial cell proliferation (GO:0001938);; Cellular Component: extracellular space (GO:0005615);; Cellular Component: intracellular (GO:0005622);; Biological Process: protein O-linked glycosylation (GO:0006493);; Molecular Function: growth factor activity (GO:0008083);; Molecular Function: heparin binding (GO:0008201);; Biological Process: negative re…	K16858|3.58104e-79|bom:102283195|K16858 vascular endothelial growth factor B | (RefSeq) VEGFB; vascular endothelial growth factor B	Ras signaling pathway (ko04014);; Rap1 signaling pathway (ko04015);; Cytokine-cytokine receptor interaction (ko04060);; PI3K-Akt signaling pathway (ko04151);; Focal adhesion (ko04510);; AGE-RAGE signaling pathway in diabetic complications (ko04933);; Pathways in cancer (ko05200)	--	--	PDGF/VEGF domain	Vascular endothelial growth factor B OS=Bos taurus OX=9913 GN=VEGFB PE=2 SV=2	A	RNA processing and modification	PREDICTED: vascular endothelial growth factor B, partial [Galeopterus variegatus]	biological process: biological regulation (GO:0065007);; cellular component: extracellular region (GO:0005576);; cellular component: extracellular region part (GO:0044421);; cellular component: cell (GO:0005623);; cellular component: cell part (GO:0044464);; biological process: metabolic process (GO:0008152);; biological process: cellular process (GO:0009987);; biological process: single-organism…
gene-VPS37C	8.14472	11.0829	8.59416	7.81165	15.2898	14.7617	17.6354	12.8791	10.7255	8.84406	12.1448	0.639231	0.326872	normal	0.00792461	0.715839	up	0.754623	0.181344	normal	--	--	Cellular Component: ESCRT I complex (GO:0000813);; Molecular Function: calcium-dependent protein binding (GO:0048306);; Cellular Component: extracellular exosome (GO:0070062);;	K12185|7.95536e-139|chx:102190024|K12185 ESCRT-I complex subunit VPS37 | (RefSeq) VPS37C; VPS37C, ESCRT-I subunit	Endocytosis (ko04144)	[S]	Function unknown	Modifier of rudimentary (Mod(r)) protein	Vacuolar protein sorting-associated protein 37C OS=Pongo abelii OX=9601 GN=VPS37C PE=2 SV=1	U	Intracellular trafficking, secretion, and vesicular transport	PREDICTED: vacuolar protein sorting-associated protein 37C isoform X3 [Ovis aries musimon]	cellular component: cell (GO:0005623);; cellular component: membrane (GO:0016020);; cellular component: macromolecular complex (GO:0032991);; cellular component: organelle (GO:0043226);; cellular component: organelle part (GO:0044422);; cellular component: membrane part (GO:0044425);; cellular component: cell part (GO:0044464);; molecular function: binding (GO:0005488);; cellular component: extra…
gene-ZBTB46	3.90537	3.37901	3.99265	3.86928	4.77176	6.50915	4.93765	6.49156	3.4461	3.76246	3.18018	0.497312	0.279932	normal	0.0191801	0.697575	up	0.910705	-0.0664689	normal	--	--	Molecular Function: nucleic acid binding (GO:0003676);; Biological Process: negative regulation of granulocyte differentiation (GO:0030853);; Biological Process: negative regulation of macrophage differentiation (GO:0045650);; Biological Process: negative regulation of monocyte differentiation (GO:0045656);; Molecular Function: metal ion binding (GO:0046872);; Biological Process: negative regulat…	K10517|0|chx:102169027|K10517 zinc finger and BTB domain-containing protein 46 | (RefSeq) ZBTB46; zinc finger and BTB domain containing 46	--	[R]	General function prediction only	BTB/POZ domain;; Zinc-finger double domain;; C2H2-type zinc-finger domain;; C2H2-type zinc finger;; Domain of unknown function (DUF3342);; Zinc finger, C2H2 type	Zinc finger and BTB domain-containing protein 8A OS=Bos taurus OX=9913 GN=ZBTB8A PE=2 SV=1	S	Function unknown	zinc finger and BTB domain-containing protein 46 [Odocoileus virginianus texanus]	molecular function: binding (GO:0005488);; biological process: biological regulation (GO:0065007)
gene-ZFAND5	162.843	130.402	200.594	183.709	146.262	243.614	277.937	269.133	149.903	178.775	178.727	0.888086	0.111214	normal	0.000439842	0.747805	up	0.891792	0.0831882	normal	--	--	Biological Process: in utero embryonic development (GO:0001701);; Biological Process: vasculature development (GO:0001944);; Biological Process: respiratory system process (GO:0003016);; Molecular Function: DNA binding (GO:0003677);; Molecular Function: zinc ion binding (GO:0008270);; Biological Process: fibroblast migration (GO:0010761);; Biological Process: platelet-derived growth factor recept…	--	--	[R]	General function prediction only	A20-like zinc finger;; AN1-like Zinc finger	AN1-type zinc finger protein 6 OS=Pongo abelii OX=9601 GN=ZFAND6 PE=2 SV=1	S	Function unknown	PREDICTED: AN1-type zinc finger protein 5 isoform X1 [Bos taurus]	biological process: multicellular organismal process (GO:0032501);; biological process: developmental process (GO:0032502);; biological process: single-organism process (GO:0044699);; molecular function: binding (GO:0005488);; biological process: cellular process (GO:0009987);; biological process: locomotion (GO:0040011);; biological process: localization (GO:0051179);; biological process: signal…
gene-ZNF219	1.76588	2.388	1.88869	3.81975	3.35408	3.14227	2.55389	2.54056	3.32638	3.66312	2.14034	0.0163319	0.604715	up	0.237261	0.392662	normal	0.267277	0.455872	normal	--	--	Biological Process: negative regulation of transcription from RNA polymerase II promoter (GO:0000122);; Molecular Function: RNA polymerase II core promoter proximal region sequence-specific DNA binding (GO:0000978);; Molecular Function: transcriptional repressor activity, RNA polymerase II core promoter proximal region sequence-specific binding (GO:0001078);; Cellular Component: nucleus (GO:00056…	--	--	[R]	General function prediction only	Zinc finger, C2H2 type;; C2H2-type zinc finger;; Zinc-finger double domain;; C2H2-type zinc-finger domain;; Drought induced 19 protein (Di19), zinc-binding	Zinc finger protein 572 OS=Bos taurus OX=9913 GN=ZNF572 PE=2 SV=1	S	Function unknown	PREDICTED: zinc finger protein 219 [Ovis aries musimon]	biological process: biological regulation (GO:0065007);; molecular function: binding (GO:0005488);; molecular function: nucleic acid binding transcription factor activity (GO:0001071);; cellular component: cell (GO:0005623);; cellular component: organelle (GO:0043226);; cellular component: cell part (GO:0044464);; biological process: cellular process (GO:0009987);; biological process: multicellul…
gene-ZNF583	7.87869	6.11886	6.26439	10.2162	10.1829	6.72228	7.68645	7.64346	8.32078	7.18343	8.55238	0.0144369	0.627575	up	0.558838	0.235195	normal	0.523939	0.255623	normal	[R]	General function prediction only	Molecular Function: RNA polymerase II regulatory region sequence-specific DNA binding (GO:0000977);; Molecular Function: transcription factor activity, sequence-specific DNA binding (GO:0003700);; Cellular Component: intracellular (GO:0005622);; Biological Process: regulation of transcription, DNA-templated (GO:0006355);; Molecular Function: metal ion binding (GO:0046872);;	K09228|0|oas:101110171|K09228 KRAB domain-containing zinc finger protein | (RefSeq) ZNF583; zinc finger protein 583	--	[R]	General function prediction only	Zinc-finger double domain;; Zinc finger, C2H2 type;; C2H2-type zinc finger;; KRAB box;; Zinc-finger double-stranded RNA-binding;; C2H2-type zinc finger;; Zinc-finger of C2H2 type;; LYAR-type C2HC zinc finger	Zinc finger protein 135 OS=Bos taurus OX=9913 GN=ZNF135 PE=2 SV=1	S	Function unknown	PREDICTED: zinc finger protein 583 isoform X1 [Ovis aries]	molecular function: binding (GO:0005488);; molecular function: nucleic acid binding transcription factor activity (GO:0001071);; biological process: biological regulation (GO:0065007);; cellular component: cell (GO:0005623);; cellular component: cell part (GO:0044464)
gene-ZNF75D	23.2432	26.87	29.7229	45.7544	46.1646	29.181	54.2547	48.7537	43.7953	51.0923	49.5456	3.81e-05	0.856866	up	0.0167084	0.714097	up	4.93e-05	0.868661	up	[R]	General function prediction only	Molecular Function: transcription factor activity, sequence-specific DNA binding (GO:0003700);; Cellular Component: nucleus (GO:0005634);; Biological Process: regulation of transcription, DNA-templated (GO:0006355);; Molecular Function: sequence-specific DNA binding (GO:0043565);; Molecular Function: metal ion binding (GO:0046872);;	K09229|0|oas:101106826|K09229 KRAB and SCAN domains-containing zinc finger protein | (RefSeq) ZNF75D; zinc finger protein 75D	--	[R]	General function prediction only	SCAN domain;; Zinc-finger double domain;; Zinc finger, C2H2 type;; KRAB box;; C2H2-type zinc finger;; Zinc-finger double-stranded RNA-binding;; C2H2-type zinc finger	Zinc finger protein 397 OS=Bos taurus OX=9913 GN=ZNF397 PE=2 SV=1	S	Function unknown	PREDICTED: zinc finger protein 75D isoform X1 [Ovis aries]	molecular function: nucleic acid binding transcription factor activity (GO:0001071);; biological process: biological regulation (GO:0065007);; cellular component: cell (GO:0005623);; cellular component: organelle (GO:0043226);; cellular component: cell part (GO:0044464);; molecular function: binding (GO:0005488)
Ovis_aries_newGene_10676	0.823824	1.94512	2.22055	1.89207	0.36186	1.32406	0.815132	0.500631	0.502499	0.40401	0.496152	0.881345	-0.153936	normal	0.532727	-0.412427	normal	0.00471443	-1.05018	down	--	--	Molecular Function: RNA-directed DNA polymerase activity (GO:0003964);; Biological Process: RNA-dependent DNA biosynthetic process (GO:0006278);;	--	--	[R]	General function prediction only	Reverse transcriptase (RNA-dependent DNA polymerase)	--	S	Function unknown	reverse transcriptase-like [Bos taurus]	molecular function: catalytic activity (GO:0003824);; biological process: metabolic process (GO:0008152);; biological process: cellular process (GO:0009987)
Ovis_aries_newGene_13586	2.27773	2.70832	2.10966	0.49556	1.14478	0.952525	0.97213	1.03244	1.2425	1.69433	0.751352	0.0642452	-0.823134	normal	0.00737734	-0.8688	down	0.218082	-0.593121	normal	--	--	Molecular Function: nucleic acid binding (GO:0003676);; Molecular Function: RNA-directed DNA polymerase activity (GO:0003964);; Molecular Function: phospholipid binding (GO:0005543);; Cellular Component: proteinaceous extracellular matrix (GO:0005578);; Cellular Component: intracellular (GO:0005622);; Cellular Component: plasma membrane (GO:0005886);; Cellular Component: fascia adherens (GO:00059…	K09228|1.93056e-52|bta:100138479|K09228 KRAB domain-containing zinc finger protein | (RefSeq) zinc finger protein 510	--	--	--	--	LINE-1 reverse transcriptase homolog OS=Nycticebus coucang OX=9470 PE=3 SV=1	S	Function unknown	PREDICTED: LOW QUALITY PROTEIN: zinc finger protein 510 [Bos taurus]	molecular function: binding (GO:0005488);; molecular function: catalytic activity (GO:0003824);; biological process: metabolic process (GO:0008152);; biological process: cellular process (GO:0009987);; cellular component: extracellular region (GO:0005576);; cellular component: extracellular region part (GO:0044421);; cellular component: cell (GO:0005623);; cellular component: cell part (GO:004446…
Ovis_aries_newGene_14228	1.37781	1.26684	2.09816	1.53143	0.430696	0.571973	1.30133	0.546283	0.53733	0.685299	0.2995	0.314746	-0.50734	normal	0.0216344	-0.800647	down	0.138467	-0.676892	normal	--	--	Molecular Function: nucleic acid binding (GO:0003676);; Molecular Function: RNA-directed DNA polymerase activity (GO:0003964);; Molecular Function: phospholipid binding (GO:0005543);; Cellular Component: intracellular (GO:0005622);; Cellular Component: fascia adherens (GO:0005916);; Biological Process: RNA-dependent DNA biosynthetic process (GO:0006278);; Biological Process: regulation of transcr…	K09228|6.04468e-71|bta:100138479|K09228 KRAB domain-containing zinc finger protein | (RefSeq) zinc finger protein 510	--	[R]	General function prediction only	Reverse transcriptase (RNA-dependent DNA polymerase)	--	S	Function unknown	reverse transcriptase-like [Bos taurus]	molecular function: binding (GO:0005488);; molecular function: catalytic activity (GO:0003824);; biological process: metabolic process (GO:0008152);; biological process: cellular process (GO:0009987);; cellular component: cell (GO:0005623);; cellular component: cell part (GO:0044464);; cellular component: cell junction (GO:0030054);; biological process: biological regulation (GO:0065007);; biolog…
Ovis_aries_newGene_14427	0.292228	0.631757	0.432797	0.038902	0.119203	0.03963	0.486928	0.622626	0.730983	1.62618	0.452695	0.0290453	-0.913635	down	0.96085	-0.054938	normal	0.306399	0.536407	normal	--	--	Molecular Function: nucleic acid binding (GO:0003676);; Molecular Function: protein binding (GO:0005515);; Cellular Component: intracellular (GO:0005622);; Biological Process: polyamine biosynthetic process (GO:0006596);; Biological Process: polyamine catabolic process (GO:0006598);; Biological Process: spermidine metabolic process (GO:0008216);; Biological Process: putrescine metabolic process (…	--	--	--	--	--	--	U	Intracellular trafficking, secretion, and vesicular transport	PREDICTED: protein eva-1 homolog C isoform X2 [Bos indicus]	molecular function: binding (GO:0005488);; cellular component: cell (GO:0005623);; cellular component: cell part (GO:0044464);; biological process: metabolic process (GO:0008152);; biological process: cellular process (GO:0009987);; molecular function: catalytic activity (GO:0003824);; biological process: biological regulation (GO:0065007);; biological process: single-organism process (GO:0044699)
Ovis_aries_newGene_15876	3.73243	3.01156	3.1992	1.91599	1.72893	2.39734	2.98726	2.9031	2.30412	2.6726	3.35654	0.004829	-0.665678	down	0.808333	-0.116724	normal	0.760824	-0.169556	normal	--	--	Molecular Function: RNA polymerase II core promoter sequence-specific DNA binding (GO:0000979);; Molecular Function: receptor binding (GO:0005102);; Cellular Component: nucleus (GO:0005634);; Cellular Component: peroxisome (GO:0005777);; Cellular Component: cytosol (GO:0005829);; Biological Process: putrescine biosynthetic process (GO:0009446);; Biological Process: putrescine catabolic process (G…	--	--	--	--	--	--	S	Function unknown	PREDICTED: uncharacterized protein LOC106991855 [Ovis aries]	molecular function: binding (GO:0005488);; cellular component: cell (GO:0005623);; cellular component: organelle (GO:0043226);; cellular component: cell part (GO:0044464);; biological process: metabolic process (GO:0008152);; biological process: cellular process (GO:0009987);; biological process: biological regulation (GO:0065007);; molecular function: catalytic activity (GO:0003824);; biological…
Ovis_aries_newGene_16492	4.50051	2.25158	3.41583	1.49865	1.34029	3.50421	2.44405	1.01649	1.73058	1.5924	1.84451	0.00656102	-0.814387	down	0.6981	-0.298508	normal	0.025882	-0.768748	down	--	--	--	--	--	--	--	--	--	--	--	uncharacterized protein LOC110141080 isoform X1 [Odocoileus virginianus texanus]	--
Ovis_aries_newGene_16771	3.38676	2.16958	3.28475	0.773323	1.35249	2.48192	2.96673	2.27181	2.19452	2.1678	1.49779	0.0083943	-0.944665	down	0.955148	-0.0461518	normal	0.318889	-0.431952	normal	--	--	Cellular Component: extracellular space (GO:0005615);; Cellular Component: nucleolus (GO:0005730);; Cellular Component: cytoplasm (GO:0005737);; Biological Process: rRNA processing (GO:0006364);; Biological Process: nervous system development (GO:0007399);; Cellular Component: small-subunit processome (GO:0032040);; Biological Process: ribosomal small subunit biogenesis (GO:0042274);; Biological …	K14769|1.33057e-58|phd:102330248|K14769 U3 small nucleolar RNA-associated protein 11 | (RefSeq) UTP11, UTP11L; UTP11, small subunit processome component homolog (S. cerevisiae)	--	[S]	Function unknown	Utp11 protein	--	S	Function unknown	PREDICTED: probable U3 small nucleolar RNA-associated protein 11 [Pantholops hodgsonii]	cellular component: extracellular region (GO:0005576);; cellular component: extracellular region part (GO:0044421);; cellular component: cell (GO:0005623);; cellular component: organelle (GO:0043226);; cellular component: organelle part (GO:0044422);; cellular component: cell part (GO:0044464);; biological process: metabolic process (GO:0008152);; biological process: cellular process (GO:0009987)…
Ovis_aries_newGene_17998	24.4226	29.6924	48.504	17.9545	21.0713	6.88794	11.9789	26.1587	11.2078	13.4304	6.04128	0.386705	-0.477317	normal	0.290096	-0.583199	normal	0.00137553	-1.09545	down	--	--	Molecular Function: calcium ion binding (GO:0005509);; Cellular Component: extracellular space (GO:0005615);; Cellular Component: multivesicular body (GO:0005771);; Cellular Component: tubulin complex (GO:0045298);;	--	--	[DZ]	Cell cycle control, cell division, chromosome partitioning;; Cytoskeleton	Translationally controlled tumour protein	Translationally-controlled tumor protein OS=Bos taurus OX=9913 GN=TPT1 PE=2 SV=1	S	Function unknown	hypothetical protein M91_03677, partial [Bos mutus]	molecular function: binding (GO:0005488);; cellular component: extracellular region (GO:0005576);; cellular component: extracellular region part (GO:0044421);; cellular component: cell (GO:0005623);; cellular component: organelle (GO:0043226);; cellular component: cell part (GO:0044464);; cellular component: macromolecular complex (GO:0032991);; cellular component: organelle part (GO:0044422)
Ovis_aries_newGene_18940	0.527635	0.788501	1.19083	0.151504	0.474072	0.205725	0.231328	0.126497	0.708958	0.308696	0.332058	0.520593	-0.417484	normal	0.021688	-0.939478	down	0.606392	-0.331999	normal	--	--	--	--	--	--	--	--	LINE-1 reverse transcriptase homolog OS=Nycticebus coucang OX=9470 PE=3 SV=1	--	--	hypothetical protein M91_00785, partial [Bos mutus]	--
Ovis_aries_newGene_19259	8.46921	11.0326	10.0068	4.80104	4.186	4.49666	12.6124	4.23714	6.47647	4.25838	4.64623	0.15491	-0.575272	normal	0.689811	Ovis_aries_newGene_26572	normal	0.00714564	-0.641377	down	--	--	Molecular Function: receptor binding (GO:0005102);; Cellular Component: nucleus (GO:0005634);; Cellular Component: peroxisome (GO:0005777);; Molecular Function: cAMP response element binding protein binding (GO:0008140);; Biological Process: putrescine biosynthetic process (GO:0009446);; Biological Process: putrescine catabolic process (GO:0009447);; Biological Process: positive regulation of CRE…	--	--	--	--	--	--	S	Function unknown	PREDICTED: uncharacterized protein LOC109575307 isoform X2 [Bos indicus]	molecular function: binding (GO:0005488);; cellular component: cell (GO:0005623);; cellular component: organelle (GO:0043226);; cellular component: cell part (GO:0044464);; biological process: metabolic process (GO:0008152);; biological process: cellular process (GO:0009987);; biological process: biological regulation (GO:0065007);; molecular function: catalytic activity (GO:0003824);; biological…
Ovis_aries_newGene_21195	38.7636	54.5386	33.2839	70.6327	48.9781	21.9285	22.1504	15.5343	125.929	42.2523	33.1562	0.448703	0.433631	normal	0.0352669	-0.742576	down	0.53282	0.375008	normal	[O]	Posttranslational modification, protein turnover, chaperones	Molecular Function: ATP binding (GO:0005524);;	--	--	[O]	Posttranslational modification, protein turnover, chaperones	Hsp70 protein	Heat shock cognate 71 kDa protein OS=Saguinus oedipus OX=9490 GN=HSPA8 PE=2 SV=1	O	Posttranslational modification, protein turnover, chaperones	PREDICTED: heat shock cognate 71 kDa protein-like [Echinops telfairi]	molecular function: binding (GO:0005488)
Ovis_aries_newGene_21983	4.15775	2.78732	4.03447	2.80242	3.43929	1.51998	2.55207	1.37351	2.31997	2.22322	2.49897	0.919279	-0.0893114	normal	0.0279644	-0.718729	down	0.1772	-0.492224	normal	--	--	--	--	--	--	--	--	--	--	--	PREDICTED: GDNF family receptor alpha-1 isoform X1 [Odobenus rosmarus divergens]	--
Ovis_aries_newGene_22611	0.759942	0.673934	0.619856	0.394597	0.735752	0.137595	0.284771	0.327154	0.279457	0.137786	0.217095	0.923847	-0.106468	normal	0.0660003	-0.796242	normal	0.0160245	-0.953061	down	--	--	Molecular Function: nucleic acid binding (GO:0003676);; Molecular Function: RNA-directed DNA polymerase activity (GO:0003964);; Molecular Function: phospholipid binding (GO:0005543);; Cellular Component: proteinaceous extracellular matrix (GO:0005578);; Cellular Component: mitochondrion (GO:0005739);; Cellular Component: plasma membrane (GO:0005886);; Cellular Component: fascia adherens (GO:00059…	K09228|2.0175e-42|bta:100138479|K09228 KRAB domain-containing zinc finger protein | (RefSeq) zinc finger protein 510	--	--	--	--	--	S	Function unknown	reverse transcriptase-like [Bos taurus]	molecular function: binding (GO:0005488);; molecular function: catalytic activity (GO:0003824);; biological process: metabolic process (GO:0008152);; biological process: cellular process (GO:0009987);; cellular component: extracellular region (GO:0005576);; cellular component: extracellular region part (GO:0044421);; cellular component: cell (GO:0005623);; cellular component: organelle (GO:004322…
Ovis_aries_newGene_22653	13.7426	9.66112	9.98686	3.74217	3.86471	8.61652	8.46082	7.67644	2.33308	5.70863	5.53542	0.101423	-0.767931	normal	0.0465166	-0.683153	down	1.75e-06	-1.31087	down	--	--	Molecular Function: protein serine/threonine kinase activity (GO:0004674);; Molecular Function: ATP binding (GO:0005524);; Cellular Component: nucleoplasm (GO:0005654);; Biological Process: protein phosphorylation (GO:0006468);;	K08868|1.08756e-54|oas:101116008|K08868 alpha-kinase | (RefSeq) ALPK2; alpha kinase 2	--	--	--	--	--	S	Function unknown	PREDICTED: alpha-protein kinase 2 isoform X1 [Ovis aries]	molecular function: catalytic activity (GO:0003824);; biological process: metabolic process (GO:0008152);; biological process: cellular process (GO:0009987);; molecular function: binding (GO:0005488);; cellular component: cell (GO:0005623);; cellular component: organelle (GO:0043226);; cellular component: organelle part (GO:0044422);; cellular component: cell part (GO:0044464)
Ovis_aries_newGene_22987	2.2541	1.85489	2.85733	2.11131	1.52477	0.718532	1.07517	1.03171	1.9183	1.80377	1.0133	0.00711252	-0.701964	down	0.147797	-0.632053	normal	0.349003	-0.38205	normal	--	--	--	--	--	--	--	--	LINE-1 reverse transcriptase homolog OS=Nycticebus coucang OX=9470 PE=3 SV=1	S	Function unknown	PREDICTED: uncharacterized protein LOC102334977 [Pantholops hodgsonii]	--
Ovis_aries_newGene_23476	5.12628	2.9665	4.64471	1.59208	2.0608	1.04151	0.174955	0.951929	0.73626	1.13577	0.242901	0.12518	-0.710969	normal	0.0125356	-0.988687	down	0.000544423	-1.20427	down	--	--	--	--	--	--	--	--	--	--	--	--	--
Ovis_aries_newGene_2490	3.13215	3.57212	1.50864	2.43505	1.10216	0.937432	1.36718	0.898981	0.892017	1.78727	0.073907	0.754553	-0.26814	normal	0.0366859	-0.84675	down	0.630315	-0.234559	normal	--	--	Molecular Function: nucleic acid binding (GO:0003676);; Molecular Function: RNA-directed DNA polymerase activity (GO:0003964);; Cellular Component: intracellular (GO:0005622);; Cellular Component: fascia adherens (GO:0005916);; Biological Process: RNA-dependent DNA biosynthetic process (GO:0006278);; Biological Process: regulation of transcription, DNA-templated (GO:0006355);; Molecular Function:…	K09228|1.60258e-60|oas:100527962|K09228 KRAB domain-containing zinc finger protein | (RefSeq) ZNF33B; zinc finger protein 33B	--	--	--	--	--	S	Function unknown	reverse transcriptase-like [Bos taurus]	molecular function: binding (GO:0005488);; molecular function: catalytic activity (GO:0003824);; biological process: metabolic process (GO:0008152);; biological process: cellular process (GO:0009987);; cellular component: cell (GO:0005623);; cellular component: cell part (GO:0044464);; cellular component: cell junction (GO:0030054);; biological process: biological regulation (GO:0065007);; biolog…
Ovis_aries_newGene_25032	1.25533	0.918911	1.30432	0.664792	0.914068	1.45052	1.56549	1.30476	2.18676	1.19114	0.907099	0.0318184	-0.619584	down	0.491407	0.331843	normal	0.967062	-0.0360447	normal	--	--	--	--	--	--	--	ENV polyprotein (coat polyprotein);; Matrix protein (MA), p15	Syncytin-2 OS=Callithrix jacchus OX=9483 GN=ERVFRD-1 PE=3 SV=1	S	Function unknown	PREDICTED: uncharacterized protein LOC105605488 [Ovis aries]	--
Ovis_aries_newGene_25585	8.36806	3.45255	7.65511	3.68831	2.69741	8.3856	3.15599	6.77872	2.75954	1.91846	2.67163	0.324964	-0.54638	normal	0.951459	0.0687804	normal	0.0124394	-0.916698	down	--	--	Cellular Component: nuclear chromatin (GO:0000790);; Molecular Function: RNA polymerase II core promoter proximal region sequence-specific DNA binding (GO:0000978);; Molecular Function: transcriptional activator activity, RNA polymerase II core promoter proximal region sequence-specific binding (GO:0001077);; Cellular Component: podosome (GO:0002102);; Cellular Component: nucleoplasm (GO:0005654)…	K12886|0|ssc:100622191|K12886 heterogeneous nuclear ribonucleoprotein K | (RefSeq) HNRNPK; heterogeneous nuclear ribonucleoprotein K	Spliceosome (ko03040);; Herpes simplex infection (ko05168);; Viral carcinogenesis (ko05203);; MicroRNAs in cancer (ko05206)	[AR]	RNA processing and modification;; General function prediction only	KH domain;; ROKNT (NUC014) domain;; KH domain;; KH domain	Heterogeneous nuclear ribonucleoprotein K OS=Oryctolagus cuniculus OX=9986 GN=HNRNPK PE=2 SV=1	K	Transcription	PREDICTED: heterogeneous nuclear ribonucleoprotein K isoform X3 [Bos mutus]	cellular component: cell (GO:0005623);; cellular component: membrane-enclosed lumen (GO:0031974);; cellular component: organelle (GO:0043226);; cellular component: organelle part (GO:0044422);; cellular component: cell part (GO:0044464);; molecular function: binding (GO:0005488);; molecular function: nucleic acid binding transcription factor activity (GO:0001071);; biological process: metabolic p…
Ovis_aries_newGene_26586	908.123	1060.97	1722	1013.88	872.452	208.258	620.29	580.711	640.709	348.156	1205.77	0.809369	-0.199357	normal	0.00193428	-1.05645	down	0.494889	-0.400045	normal	[C]	Energy production and conversion	Molecular Function: cytochrome-c oxidase activity (GO:0004129);; Molecular Function: peroxidase activity (GO:0004601);; Molecular Function: prostaglandin-endoperoxide synthase activity (GO:0004666);; Molecular Function: iron ion binding (GO:0005506);; Cellular Component: nucleus (GO:0005634);; Cellular Component: mitochondrial respiratory chain complex IV (GO:0005751);; Cellular Component: endopl…	K02256|0|oas:808251|K02256 cytochrome c oxidase subunit 1 [EC:1.9.3.1] | (RefSeq) COX1, COI; cytochrome c oxidase subunit I	Oxidative phosphorylation (ko00190);; Cardiac muscle contraction (ko04260);; Non-alcoholic fatty liver disease (NAFLD) (ko04932);; Alzheimer's disease (ko05010);; Parkinson's disease (ko05012);; Huntington's disease (ko05016)	[C]	Energy production and conversion	NADH-ubiquinone/plastoquinone oxidoreductase chain 4L;; NADH dehydrogenase;; Cytochrome c oxidase subunit III;; Cytochrome C oxidase subunit II, transmembrane domain	Cytochrome c oxidase subunit 1 OS=Ovis aries OX=9940 GN=MT-CO1 PE=1 SV=1	C	Energy production and conversion	cytochrome c oxidase subunit I (mitochondrion) [Tragelaphus scriptus]	molecular function: catalytic activity (GO:0003824);; molecular function: transporter activity (GO:0005215);; molecular function: electron carrier activity (GO:0009055);; biological process: metabolic process (GO:0008152);; biological process: single-organism process (GO:0044699);; biological process: localization (GO:0051179);; molecular function: antioxidant activity (GO:0016209);; biological p…
Ovis_aries_newGene_27940	9.91729	8.3409	7.80229	2.49259	5.30266	4.9402	3.0054	4.85248	4.37008	4.44212	4.6992	0.103831	-0.719464	normal	0.106263	-0.649502	normal	0.0045027	-0.76947	down	--	--	Cellular Component: membrane (GO:0016020);;	K06797|6.06036e-07|oas:101122716|K06797 cadherin 4, type 1, R-cadherin | (RefSeq) CDH4; cadherin 4	Cell adhesion molecules (CAMs) (ko04514)	--	--	--	--	S	Function unknown	PREDICTED: cadherin-4 isoform X1 [Ovis aries]	cellular component: membrane (GO:0016020)
Ovis_aries_newGene_4282	3.40916	2.26367	2.07544	0.612791	2.22293	0.995334	0.979988	1.55381	0.880708	2.83254	1.21846	0.0987769	-0.780691	normal	2.98e-05	-1.3768	down	0.80563	-0.150479	normal	--	--	--	K09228|4.01314e-55|oas:100527962|K09228 KRAB domain-containing zinc finger protein | (RefSeq) ZNF33B; zinc finger protein 33B	--	[R]	General function prediction only	--	--	S	Function unknown	reverse transcriptase-like [Bos taurus]	--
Ovis_aries_newGene_5005	1.09902	0.802478	2.70234	0.149744	0.308082	0.239396	0.965261	1.84676	0.076572	0.985182	0.98982	0.0192351	-0.947246	down	0.849289	-0.176751	normal	0.577296	-0.325318	normal	--	--	--	--	--	--	--	--	--	--	--	--	--
Ovis_aries_newGene_6214	5.09847	2.2167	2.1945	0.283615	0.270262	5.51908	0.627156	4.89107	0.452289	0.706988	0	0.0292641	-0.898795	down	0.840058	0.183842	normal	0.146754	-0.596612	normal	--	--	Biological Process: detection of chemical stimulus involved in sensory perception of bitter taste (GO:0001580);; Molecular Function: nucleic acid binding (GO:0003676);; Molecular Function: metalloendopeptidase activity (GO:0004222);; Molecular Function: G-protein coupled receptor activity (GO:0004930);; Molecular Function: ATP binding (GO:0005524);; Cellular Component: extracellular space (GO:000…	K08474|1.53747e-29|bta:664647|K08474 taste receptor type 2 | (RefSeq) T2R65A; bitter taste receptor Bota-T2R65A	--	--	--	--	--	--	--	bitter taste receptor Bota-T2R65A [Bos taurus]	biological process: multicellular organismal process (GO:0032501);; biological process: response to stimulus (GO:0050896);; molecular function: binding (GO:0005488);; molecular function: catalytic activity (GO:0003824);; biological process: metabolic process (GO:0008152);; molecular function: signal transducer activity (GO:0004871);; molecular function: molecular transducer activity (GO:0060089);…
Ovis_aries_newGene_66	0.976432	4.51898	4.76722	2.36678	0.190197	0.121341	0	0.082719	0.074442	0.535541	2.15735	0.675912	-0.270559	normal	7.98e-05	-1.2846	down	0.626046	-0.213018	normal	--	--	Biological Process: regulation of cell growth (GO:0001558);; Molecular Function: fibronectin binding (GO:0001968);; Biological Process: female pregnancy (GO:0007565);; Biological Process: regulation of glucose metabolic process (GO:0010906);; Biological Process: negative regulation of smooth muscle cell migration (GO:0014912);; Biological Process: negative regulation of translation (GO:0017148);;…	--	--	--	--	--	Insulin-like growth factor-binding protein 5 OS=Bos taurus OX=9913 GN=IGFBP5 PE=2 SV=2	S	Function unknown	insulin-like growth factor-binding protein 5, partial [Bos taurus]	biological process: biological regulation (GO:0065007);; molecular function: binding (GO:0005488);; biological process: reproduction (GO:0000003);; biological process: reproductive process (GO:0022414);; biological process: multicellular organismal process (GO:0032501);; biological process: multi-organism process (GO:0051704);; biological process: developmental process (GO:0032502);; biological p…
Ovis_aries_newGene_6650	4.57499	3.20605	4.31672	1.54671	0.936298	1.77672	2.45872	2.23655	3.25614	2.81208	2.61584	0.00613889	-1.02101	down	0.056825	-0.703483	normal	0.878282	-0.123441	normal	--	--	Cellular Component: intracellular part (GO:0044424);; Molecular Function: metal ion binding (GO:0046872);;	--	--	--	--	--	--	--	--	PREDICTED: uncharacterized protein LOC105605488 [Ovis aries]	cellular component: cell (GO:0005623);; cellular component: cell part (GO:0044464);; molecular function: binding (GO:0005488)
ABCB1	1.66517	1.73066	1.1212	0.54512	0.314487	0.563942	0.68616	0.214955	1.06292	0.307076	1.1908	0.00888442	-1.00541	down	0.0266014	-0.900543	down	0.479442	-0.416388	normal	[V]	Defense mechanisms	Biological Process: G2/M transition of mitotic cell cycle (GO:0000086);; Biological Process: antigen processing and presentation of exogenous protein antigen via MHC class Ib, TAP-dependent (GO:0002481);; Biological Process: antigen processing and presentation of endogenous peptide antigen via MHC class I via ER pathway, TAP-dependent (GO:0002485);; Biological Process: antigen processing and pres…	K05658|0|oas:443367|K05658 ATP-binding cassette, subfamily B (MDR/TAP), member 1 [EC:3.6.3.44] | (RefSeq) ABCB1, MDR1, Pgp; ATP-binding cassette, sub-family B (MDR/TAP), member 1	ABC transporters (ko02010);; Bile secretion (ko04976);; MicroRNAs in cancer (ko05206)	[Q]	Secondary metabolites biosynthesis, transport and catabolism	ABC transporter transmembrane region;; ABC transporter;; AAA ATPase domain;; Zeta toxin;; RsgA GTPase;; AAA domain;; AAA domain (dynein-related subfamily);; Rad17 cell cycle checkpoint protein;; ATPase family associated with various cellular activities (AAA);; ABC transporter	Bile salt export pump OS=Oryctolagus cuniculus OX=9986 GN=ABCB11 PE=2 SV=1	V	Defense mechanisms	multidrug resistance protein 1 [Ovis aries]	biological process: cellular process (GO:0009987);; biological process: single-organism process (GO:0044699);; biological process: immune system process (GO:0002376);; biological process: biological regulation (GO:0065007);; molecular function: binding (GO:0005488);; cellular component: cell (GO:0005623);; cellular component: cell part (GO:0044464);; cellular component: membrane (GO:0016020);; ce…
ABI3BP	6.98654	5.43183	7.21205	3.7654	3.89128	3.8059	4.58363	4.5273	4.92817	3.3619	3.52978	0.0188178	-0.585523	down	0.0859566	-0.434556	normal	0.0348604	-0.606182	down	--	--	Molecular Function: collagen binding (GO:0005518);; Cellular Component: interstitial matrix (GO:0005614);; Cellular Component: extracellular space (GO:0005615);; Molecular Function: heparin binding (GO:0008201);; Biological Process: positive regulation of cell-substrate adhesion (GO:0010811);; Biological Process: extracellular matrix organization (GO:0030198);;	--	--	--	--	Fibronectin type III domain	--	U	Intracellular trafficking, secretion, and vesicular transport	PREDICTED: target of Nesh-SH3 isoform X1 [Ovis aries musimon]	molecular function: binding (GO:0005488);; cellular component: extracellular region (GO:0005576);; cellular component: extracellular region part (GO:0044421);; biological process: biological regulation (GO:0065007);; biological process: cellular process (GO:0009987);; biological process: single-organism process (GO:0044699);; biological process: cellular component organization or biogenesis (GO:0…
ADAMTS16	2.0851	1.09774	1.567	0.665297	0.535544	0.693497	0.750193	0.556135	0.83635	0.957815	0.53268	0.0290453	-0.858707	down	0.0162232	-0.832951	down	0.118299	-0.679873	normal	--	--	Biological Process: branching involved in ureteric bud morphogenesis (GO:0001658);; Molecular Function: metalloendopeptidase activity (GO:0004222);; Cellular Component: proteinaceous extracellular matrix (GO:0005578);; Biological Process: proteolysis (GO:0006508);; Biological Process: integrin-mediated signaling pathway (GO:0007229);; Molecular Function: zinc ion binding (GO:0008270);;	K08630|0|phd:102330058|K08630 a disintegrin and metalloproteinase with thrombospondin motifs 16 [EC:3.4.24.-] | (RefSeq) ADAMTS16; ADAM metallopeptidase with thrombospondin type 1 motif 16	--	[O]	Posttranslational modification, protein turnover, chaperones	ADAM-TS Spacer 1;; Reprolysin family propeptide;; Reprolysin (M12B) family zinc metalloprotease;; Thrombospondin type 1 domain;; Metallo-peptidase family M12;; PLAC (protease and lacunin) domain;; Metallo-peptidase family M12B Reprolysin-like;; Metallo-peptidase family M12B Reprolysin-like;; Metallo-peptidase family M12B Reprolysin-like	A disintegrin and metalloproteinase with thrombospondin motifs 2 OS=Bos taurus OX=9913 GN=ADAMTS2 PE=1 SV=1	S	Function unknown	PREDICTED: A disintegrin and metalloproteinase with thrombospondin motifs 16 isoform X2 [Ovis aries musimon]	biological process: multicellular organismal process (GO:0032501);; biological process: developmental process (GO:0032502);; biological process: single-organism process (GO:0044699);; molecular function: catalytic activity (GO:0003824);; biological process: metabolic process (GO:0008152);; cellular component: extracellular region (GO:0005576);; cellular component: extracellular region part (GO:00…
gene-ADAMTS7	1.44072	0.815292	0.716161	0.413707	0.612301	0.266072	0.472458	0.404761	0.368999	0.647222	0.478129	0.399629	-0.499602	normal	0.0308249	-0.843683	down	0.240359	-0.58198	normal	--	--	Molecular Function: metalloendopeptidase activity (GO:0004222);; Cellular Component: proteinaceous extracellular matrix (GO:0005578);; Molecular Function: zinc ion binding (GO:0008270);; Cellular Component: cell surface (GO:0009986);; Biological Process: negative regulation of chondrocyte differentiation (GO:0032331);; Biological Process: proteolysis involved in cellular protein catabolic process…	K08622|0|bom:102283528|K08622 a disintegrin and metalloproteinase with thrombospondin motifs 7 [EC:3.4.24.-] | (RefSeq) ADAMTS7; ADAM metallopeptidase with thrombospondin type 1 motif 7	--	[O]	Posttranslational modification, protein turnover, chaperones	Reprolysin family propeptide;; ADAM-TS Spacer 1;; Thrombospondin type 1 domain;; Reprolysin (M12B) family zinc metalloprotease;; Metallo-peptidase family M12;; Metallo-peptidase family M12B Reprolysin-like	A disintegrin and metalloproteinase with thrombospondin motifs 2 OS=Bos taurus OX=9913 GN=ADAMTS2 PE=1 SV=1	S	Function unknown	PREDICTED: A disintegrin and metalloproteinase with thrombospondin motifs 7 isoform X2 [Ovis aries musimon]	molecular function: catalytic activity (GO:0003824);; biological process: metabolic process (GO:0008152);; cellular component: extracellular region (GO:0005576);; cellular component: extracellular region part (GO:0044421);; molecular function: binding (GO:0005488);; cellular component: cell (GO:0005623);; cellular component: cell part (GO:0044464);; biological process: biological regulation (GO:0…
gene-ADCY7	3.02208	2.18532	2.44666	1.90396	1.58504	1.30977	1.6984	1.0133	1.76969	2.37821	1.78676	0.577786	-0.30893	normal	0.0473756	-0.641013	down	0.583804	-0.270738	normal	[T]	Signal transduction mechanisms	Molecular Function: adenylate cyclase activity (GO:0004016);; Molecular Function: ATP binding (GO:0005524);; Cellular Component: intracellular (GO:0005622);; Cellular Component: plasma membrane (GO:0005886);; Biological Process: adenylate cyclase-activating G-protein coupled receptor signaling pathway (GO:0007189);; Biological Process: adenylate cyclase-inhibiting G-protein coupled receptor signa…	K08047|0|chx:102185858|K08047 adenylate cyclase 7 [EC:4.6.1.1] | (RefSeq) ADCY7; adenylate cyclase 7	Purine metabolism (ko00230);; Endocrine resistance (ko01522);; Rap1 signaling pathway (ko04015);; Calcium signaling pathway (ko04020);; cGMP-PKG signaling pathway (ko04022);; cAMP signaling pathway (ko04024);; Chemokine signaling pathway (ko04062);; Phospholipase D signaling pathway (ko04072);; Oocyte meiosis (ko04114);; Longevity regulating pathway (ko04211);; Longevity regulating pathway - mult…	[C]	Energy production and conversion	Adenylate and Guanylate cyclase catalytic domain;; Domain of Unknown Function (DUF1053);; Adenylyl cyclase N-terminal extracellular and transmembrane region	Adenylate cyclase type 7 OS=Bos taurus OX=9913 GN=ADCY7 PE=2 SV=1	T	Signal transduction mechanisms	PREDICTED: adenylate cyclase type 7 isoform X3 [Ovis aries musimon]	molecular function: catalytic activity (GO:0003824);; molecular function: binding (GO:0005488);; cellular component: cell (GO:0005623);; cellular component: cell part (GO:0044464);; cellular component: membrane (GO:0016020);; biological process: cellular process (GO:0009987);; biological process: signaling (GO:0023052);; biological process: single-organism process (GO:0044699);; biological proces…
ADCYAP1R1	1.53557	1.07678	1.07359	0.539321	0.478667	0.443317	0.565806	0.331183	1.18274	0.518273	0.278531	0.0161819	-0.850214	down	0.000781065	-1.01692	down	0.37263	-0.485667	normal	--	--	Molecular Function: vasoactive intestinal polypeptide receptor activity (GO:0004999);; Cellular Component: plasma membrane (GO:0005886);; Biological Process: cell surface receptor signaling pathway (GO:0007166);; Biological Process: G-protein coupled receptor signaling pathway (GO:0007186);; Cellular Component: integral component of membrane (GO:0016021);; Cellular Component: receptor complex (GO…	K04587|0|phd:102338986|K04587 pituitary adenylate cyclase-activating polypeptide type I receptor | (RefSeq) ADCYAP1R1; ADCYAP receptor type I	cAMP signaling pathway (ko04024);; Neuroactive ligand-receptor interaction (ko04080);; Circadian entrainment (ko04713);; Insulin secretion (ko04911);; Renin secretion (ko04924)	[T]	Signal transduction mechanisms	7 transmembrane receptor (Secretin family);; Hormone receptor domain	Pituitary adenylate cyclase-activating polypeptide type I receptor OS=Bos taurus OX=9913 GN=ADCYAP1R1 PE=2 SV=1	U	Intracellular trafficking, secretion, and vesicular transport	PREDICTED: pituitary adenylate cyclase-activating polypeptide type I receptor isoform X1 [Ovis aries musimon]	molecular function: signal transducer activity (GO:0004871);; molecular function: molecular transducer activity (GO:0060089);; biological process: cellular process (GO:0009987);; biological process: signaling (GO:0023052);; biological process: single-organism process (GO:0044699);; biological process: response to stimulus (GO:0050896);; biological process: biological regulation (GO:0065007);; cel…
gene-ADGRL4	9.30195	8.31619	6.63952	5.1805	6.19048	2.95344	4.81074	2.92265	6.66339	6.41251	4.97629	0.486164	-0.334143	normal	0.00045234	-0.905015	down	0.416095	-0.333584	normal	--	--	Molecular Function: G-protein coupled receptor activity (GO:0004930);; Molecular Function: calcium ion binding (GO:0005509);; Biological Process: cell surface receptor signaling pathway (GO:0007166);; Biological Process: G-protein coupled receptor signaling pathway (GO:0007186);; Cellular Component: integral component of membrane (GO:0016021);;	K04595|0|oas:101103604|K04595 latrophilin and seven transmembrane domain containing 1 | (RefSeq) ADGRL4, ELTD1; adhesion G protein-coupled receptor L4	--	[T]	Signal transduction mechanisms	7 transmembrane receptor (Secretin family);; GPCR-Autoproteolysis INducing (GAIN) domain;; GPCR proteolysis site, GPS, motif;; Calcium-binding EGF domain	Adhesion G protein-coupled receptor L3 OS=Bos taurus OX=9913 GN=ADGRL3 PE=2 SV=1	S	Function unknown	PREDICTED: adhesion G protein-coupled receptor L4 [Ovis aries]	molecular function: signal transducer activity (GO:0004871);; molecular function: molecular transducer activity (GO:0060089);; biological process: cellular process (GO:0009987);; biological process: signaling (GO:0023052);; biological process: single-organism process (GO:0044699);; biological process: response to stimulus (GO:0050896);; biological process: biological regulation (GO:0065007);; mol…
AHCYL2	33.7383	34.6527	43.9002	17.3644	16.0634	17.7471	19.3379	19.5203	26.4554	34.6753	30.5974	4.52e-06	-0.929726	down	7.25e-05	-0.770754	down	0.648076	-0.208568	normal	[H]	Coenzyme transport and metabolism	Molecular Function: adenosylhomocysteinase activity (GO:0004013);; Molecular Function: protein binding (GO:0005515);; Cellular Component: endoplasmic reticulum (GO:0005783);; Cellular Component: cytosol (GO:0005829);; Biological Process: one-carbon metabolic process (GO:0006730);; Biological Process: S-adenosylmethionine cycle (GO:0033353);; Cellular Component: neuron projection (GO:0043005);;	K01251|0|bta:532836|K01251 adenosylhomocysteinase [EC:3.3.1.1] | (RefSeq) AHCYL2, IRBIT2; adenosylhomocysteinase like 2	Cysteine and methionine metabolism (ko00270)	[H]	Coenzyme transport and metabolism	S-adenosyl-L-homocysteine hydrolase;; S-adenosyl-L-homocysteine hydrolase, NAD binding domain;; D-isomer specific 2-hydroxyacid dehydrogenase, NAD binding domain	Adenosylhomocysteinase 3 OS=Bos taurus OX=9913 GN=AHCYL2 PE=1 SV=1	H	Coenzyme transport and metabolism	adenosylhomocysteinase 3 isoform X1 [Felis catus]	molecular function: catalytic activity (GO:0003824);; molecular function: binding (GO:0005488);; cellular component: cell (GO:0005623);; cellular component: organelle (GO:0043226);; cellular component: cell part (GO:0044464);; biological process: metabolic process (GO:0008152);; biological process: cellular process (GO:0009987);; biological process: single-organism process (GO:0044699)
AK4	10.5974	12.083	11.6101	5.35817	6.88204	13.5888	10.4698	10.825	19.0248	12.946	10.0825	0.0107522	-0.687911	down	0.812266	0.150075	normal	0.604913	0.257824	normal	[F]	Nucleotide transport and metabolism	Molecular Function: adenylate kinase activity (GO:0004017);; Molecular Function: nucleoside diphosphate kinase activity (GO:0004550);; Molecular Function: ATP binding (GO:0005524);; Molecular Function: GTP binding (GO:0005525);; Cellular Component: mitochondrial matrix (GO:0005759);; Biological Process: nucleoside diphosphate phosphorylation (GO:0006165);; Biological Process: ADP biosynthetic pro…	K00939|8.10527e-152|phd:102318211|K00939 adenylate kinase [EC:2.7.4.3] | (RefSeq) AK4; adenylate kinase 4	Purine metabolism (ko00230)	[F]	Nucleotide transport and metabolism	Adenylate kinase;; AAA domain;; Adenylate kinase, active site lid;; AAA domain;; Cytidylate kinase	Adenylate kinase 4, mitochondrial OS=Bos taurus OX=9913 GN=AK4 PE=2 SV=1	F	Nucleotide transport and metabolism	PREDICTED: adenylate kinase 4, mitochondrial [Bubalus bubalis]	molecular function: catalytic activity (GO:0003824);; biological process: metabolic process (GO:0008152);; biological process: cellular process (GO:0009987);; biological process: single-organism process (GO:0044699);; molecular function: binding (GO:0005488);; cellular component: cell (GO:0005623);; cellular component: membrane-enclosed lumen (GO:0031974);; cellular component: organelle (GO:00432…
gene-AMIGO2	2.49507	2.02098	1.3003	0.955703	1.68277	0.338542	0.838003	0.874664	1.47214	1.13506	1.05215	0.744401	-0.271547	normal	0.0430117	-0.84479	down	0.394634	-0.440877	normal	[K]	Transcription	Molecular Function: protein binding (GO:0005515);; Cellular Component: integral component of membrane (GO:0016021);; Biological Process: negative regulation of apoptotic process (GO:0043066);; Biological Process: positive regulation of synapse assembly (GO:0051965);;	--	--	--	--	Leucine rich repeat;; Leucine Rich repeats (2 copies);; Leucine rich repeats (6 copies);; Leucine Rich Repeat;; Immunoglobulin domain	Amphoterin-induced protein 2 OS=Pongo abelii OX=9601 GN=AMIGO2 PE=2 SV=1	S	Function unknown	PREDICTED: amphoterin-induced protein 2 [Ovis aries]	molecular function: binding (GO:0005488);; cellular component: membrane (GO:0016020);; cellular component: membrane part (GO:0044425);; biological process: biological regulation (GO:0065007)
gene-ANGPTL1	16.592	10.9449	15.3467	11.1126	11.9099	5.36721	9.86004	6.68804	9.73262	8.4047	9.75589	0.799765	-0.162791	normal	0.0127122	-0.717301	down	0.133952	-0.492597	normal	--	--	Molecular Function: receptor binding (GO:0005102);; Cellular Component: extracellular space (GO:0005615);; Biological Process: transmembrane receptor protein tyrosine kinase signaling pathway (GO:0007169);; Cellular Component: extracellular exosome (GO:0070062);;	--	--	[R]	General function prediction only	Fibrinogen beta and gamma chains, C-terminal globular domain	Angiopoietin-related protein 1 OS=Bos taurus OX=9913 GN=ANGPTL1 PE=2 SV=1	S	Function unknown	PREDICTED: angiopoietin-related protein 1 [Ovis aries]	molecular function: binding (GO:0005488);; cellular component: extracellular region (GO:0005576);; cellular component: extracellular region part (GO:0044421);; biological process: cellular process (GO:0009987);; biological process: signaling (GO:0023052);; biological process: single-organism process (GO:0044699);; biological process: response to stimulus (GO:0050896);; biological process: biologi…
gene-ANGPTL2	43.3681	28.6489	30.4449	26.9135	25.5409	14.1106	24.3712	14.5488	18.1977	22.2745	25.592	0.708864	-0.219912	normal	0.0182816	-0.702904	down	0.232326	-0.471822	normal	--	--	Cellular Component: extracellular exosome (GO:0070062);;	--	--	[R]	General function prediction only	Fibrinogen beta and gamma chains, C-terminal globular domain	Angiopoietin-related protein 1 OS=Bos taurus OX=9913 GN=ANGPTL1 PE=2 SV=1	S	Function unknown	PREDICTED: angiopoietin-related protein 2 [Bos indicus]	cellular component: extracellular region (GO:0005576);; cellular component: organelle (GO:0043226);; cellular component: extracellular region part (GO:0044421)
gene-ANKRD34B	0.878074	0.416906	0.259877	0.081771	0.304618	0.085883	0.090432	0.02177	0.033861	0.467117	0.087413	0.523315	-0.397962	normal	0.00658997	-1.02707	down	0.53282	-0.332139	normal	[T]	Signal transduction mechanisms	--	--	--	--	--	Ankyrin repeats (many copies);; Ankyrin repeats (3 copies);; Ankyrin repeat;; Ankyrin repeats (many copies);; Ankyrin repeat	LINE-1 reverse transcriptase homolog OS=Nycticebus coucang OX=9470 PE=3 SV=1	S	Function unknown	PREDICTED: ankyrin repeat domain-containing protein 34B [Ovis aries musimon]	--
gene-ANKRD50	2.0617	1.74166	1.61319	1.58261	1.54206	0.846505	1.13611	1.06093	1.53737	1.18153	1.35074	0.919279	-0.082181	normal	0.0266014	-0.61288	down	0.427615	-0.321473	normal	[D]	Cell cycle control, cell division, chromosome partitioning	Cellular Component: intracellular (GO:0005622);; Biological Process: retrograde transport, endosome to plasma membrane (GO:1990126);;	--	--	[R]	General function prediction only	Ankyrin repeats (3 copies);; Ankyrin repeats (many copies);; Ankyrin repeat;; Ankyrin repeats (many copies);; Ankyrin repeat	Inversin OS=Canis lupus familiaris OX=9615 GN=INVS PE=1 SV=1	S	Function unknown	PREDICTED: ankyrin repeat domain-containing protein 50 [Ovis aries musimon]	cellular component: cell (GO:0005623);; cellular component: cell part (GO:0044464);; biological process: localization (GO:0051179)
ANTXR1	5.48928	6.12838	6.58105	3.1978	3.10827	4.3038	3.87739	4.35927	3.54241	3.45073	3.95347	0.0041813	-0.725264	down	0.407568	-0.339083	normal	0.039786	-0.598899	down	--	--	Molecular Function: transmembrane signaling receptor activity (GO:0004888);; Molecular Function: collagen binding (GO:0005518);; Biological Process: signal transduction (GO:0007165);; Cellular Component: cell surface (GO:0009986);; Cellular Component: integral component of membrane (GO:0016021);; Biological Process: reproductive process (GO:0022414);; Cellular Component: lamellipodium membrane (G…	K20909|0|tup:102469015|K20909 anthrax toxin receptor | (RefSeq) ANTXR1; anthrax toxin receptor 1	--	--	--	Anthrax receptor C-terminus region;; Anthrax receptor extracellular domain;; von Willebrand factor type A domain;; von Willebrand factor type A domain	Anthrax toxin receptor-like OS=Macaca fascicularis OX=9541 GN=ANTXRL PE=2 SV=1	U	Intracellular trafficking, secretion, and vesicular transport	anthrax toxin receptor 1 [Loxodonta africana]	molecular function: signal transducer activity (GO:0004871);; molecular function: molecular transducer activity (GO:0060089);; biological process: cellular process (GO:0009987);; biological process: signaling (GO:0023052);; biological process: single-organism process (GO:0044699);; biological process: response to stimulus (GO:0050896);; biological process: biological regulation (GO:0065007);; mol…
ARHGEF28	1.42207	1.26569	1.47083	0.736183	0.589123	0.882576	0.564884	0.920302	0.734633	1.11702	0.47625	0.031042	-0.763645	down	0.39577	-0.456297	normal	0.251827	-0.548123	normal	--	--	Molecular Function: Rho guanyl-nucleotide exchange factor activity (GO:0005089);; Cellular Component: intracellular (GO:0005622);; Biological Process: regulation of Rho protein signal transduction (GO:0035023);; Biological Process: positive regulation of GTPase activity (GO:0043547);;	K21072|0|oas:101112674|K21072 A-kinase anchor protein 28 | (RefSeq) ARHGEF28; Rho guanine nucleotide exchange factor 28	--	--	--	RhoGEF domain;; Phorbol esters/diacylglycerol binding domain (C1 domain);; PH domain	Rho guanine nucleotide exchange factor 2 OS=Sus scrofa OX=9823 GN=ARHGEF2 PE=2 SV=1	T	Signal transduction mechanisms	PREDICTED: rho guanine nucleotide exchange factor 28 isoform X1 [Ovis aries]	molecular function: molecular function regulator (GO:0098772);; biological process: biological regulation (GO:0065007);; cellular component: cell (GO:0005623);; cellular component: cell part (GO:0044464)
gene-ARMCX1	5.76465	4.55813	5.08138	2.49975	4.54812	2.24308	3.74602	2.5267	4.08957	4.01127	3.16302	0.618925	-0.316748	normal	0.0436258	-0.615949	down	0.376427	-0.349578	normal	--	--	--	--	--	--	--	Armadillo-like;; Armadillo/beta-catenin-like repeat	Armadillo repeat-containing X-linked protein 1 OS=Pongo abelii OX=9601 GN=ARMCX1 PE=2 SV=1	S	Function unknown	PREDICTED: armadillo repeat-containing X-linked protein 1 [Ovis aries]	--
BHLHE40	87.979	66.1659	92.3922	38.6427	13.7856	32.9439	26.3045	34.1903	37.2612	43.1008	56.2686	0.0218871	-0.919698	down	1.21e-05	-1.04935	down	0.0532264	-0.652217	normal	--	--	Biological Process: negative regulation of transcription from RNA polymerase II promoter (GO:0000122);; Molecular Function: transcriptional repressor activity, RNA polymerase II core promoter proximal region sequence-specific binding (GO:0001078);; Molecular Function: RNA polymerase II activating transcription factor binding (GO:0001102);; Molecular Function: transcriptional repressor activity, R…	K03729|0|oas:100169939|K03729 class B basic helix-loop-helix protein 2 | (RefSeq) BHLHE40, BHLHB2; basic helix-loop-helix family member e40	Circadian rhythm (ko04710)	[K]	Transcription	Helix-loop-helix DNA-binding domain;; Hairy Orange	Class E basic helix-loop-helix protein 40 OS=Ovis aries OX=9940 GN=BHLHE40 PE=2 SV=1	K	Transcription	class E basic helix-loop-helix protein 40 [Ovis aries]	biological process: biological regulation (GO:0065007);; molecular function: nucleic acid binding transcription factor activity (GO:0001071);; molecular function: binding (GO:0005488);; molecular function: transcription factor activity, protein binding (GO:0000988);; cellular component: cell (GO:0005623);; cellular component: organelle (GO:0043226);; cellular component: organelle part (GO:0044422…
gene-BMP1	6.90442	5.19226	4.80293	4.10472	3.54097	1.61881	3.6501	1.98305	3.63876	3.62525	4.69777	0.474523	-0.358878	normal	0.00737734	-0.866712	down	0.407187	-0.366386	normal	[NW]	Cell motility;; Extracellular structures	Molecular Function: metalloendopeptidase activity (GO:0004222);; Molecular Function: cytokine activity (GO:0005125);; Molecular Function: transforming growth factor beta receptor binding (GO:0005160);; Molecular Function: calcium ion binding (GO:0005509);; Cellular Component: extracellular space (GO:0005615);; Biological Process: proteolysis (GO:0006508);; Molecular Function: zinc ion binding (GO…	K05502|0|oas:101122334|K05502 bone morphogenetic protein 1 [EC:3.4.24.19] | (RefSeq) BMP1; bone morphogenetic protein 1	--	[O]	Posttranslational modification, protein turnover, chaperones	CUB domain;; Astacin (Peptidase family M12A);; Coagulation Factor Xa inhibitory site;; Calcium-binding EGF domain;; Complement Clr-like EGF-like;; EGF-like domain	Cubilin OS=Canis lupus familiaris OX=9615 GN=CUBN PE=1 SV=1	O	Posttranslational modification, protein turnover, chaperones	PREDICTED: bone morphogenetic protein 1 isoform X1 [Ovis aries]	molecular function: catalytic activity (GO:0003824);; biological process: metabolic process (GO:0008152);; molecular function: binding (GO:0005488);; cellular component: extracellular region (GO:0005576);; cellular component: extracellular region part (GO:0044421);; biological process: biological regulation (GO:0065007);; biological process: cellular process (GO:0009987);; biological process: sig…
gene-BMPER	1.61868	1.13179	1.62379	0.798504	1.42599	0.592283	0.885859	0.642554	1.48003	0.993326	0.953111	0.847257	-0.186007	normal	0.0392493	-0.717862	down	0.700304	-0.236342	normal	--	--	--	--	--	[WV]	Extracellular structures;; Defense mechanisms	von Willebrand factor type D domain;; von Willebrand factor type C domain;; C8 domain;; Trypsin Inhibitor like cysteine rich domain	SCO-spondin OS=Bos taurus OX=9913 GN=SSPO PE=2 SV=2	S	Function unknown	PREDICTED: BMP-binding endothelial regulator protein isoform X1 [Ovis aries musimon]	--
BOK	2.94094	3.37634	2.90407	1.406	0.886669	1.43447	2.10144	1.95865	2.09888	1.54941	1.37301	0.0352232	-0.8505	down	0.273483	-0.484825	normal	0.138467	-0.618488	normal	--	--	--	K02561|1.46242e-109|bta:504851|K02561 Bcl-2-related ovarian killer protein | (RefSeq) BOK; BOK, BCL2 family apoptosis regulator	Apoptosis - multiple species (ko04215)	[T]	Signal transduction mechanisms	Apoptosis regulator proteins, Bcl-2 family	--	U	Intracellular trafficking, secretion, and vesicular transport	PREDICTED: bcl-2-related ovarian killer protein isoform X3 [Capra hircus]	--
gene-C1QTNF3	12.2845	9.04932	9.91501	8.03979	5.79327	4.57309	3.81494	3.49342	6.08551	6.53991	6.59671	0.406215	-0.390853	normal	1.13e-05	-1.0541	down	0.0609381	-0.560664	normal	--	--	Cellular Component: extracellular region (GO:0005576);; Cellular Component: collagen trimer (GO:0005581);;	--	--	--	--	C1q domain;; Collagen triple helix repeat (20 copies)	Complement C1q and tumor necrosis factor-related protein 9 OS=Bos taurus OX=9913 GN=C1QTNF9 PE=2 SV=1	S	Function unknown	PREDICTED: complement C1q tumor necrosis factor-related protein 3 isoform X1 [Ovis aries]	cellular component: extracellular region (GO:0005576);; cellular component: macromolecular complex (GO:0032991)
gene-C1QTNF6	7.83822	5.22507	3.62383	2.46975	3.91105	1.16397	3.10601	1.22736	2.81884	3.13807	3.95924	0.469081	-0.444364	normal	0.00998383	-0.970912	down	0.301233	-0.494114	normal	--	--	Cellular Component: collagen trimer (GO:0005581);; Cellular Component: extracellular space (GO:0005615);; Molecular Function: identical protein binding (GO:0042802);; Biological Process: protein heterotrimerization (GO:0070208);;	K19470|1.25187e-162|oas:101102801|K19470 complement C1q tumor necrosis factor-related protein 6 | (RefSeq) C1QTNF6; C1q and tumor necrosis factor related protein 6	--	--	--	C1q domain;; Collagen triple helix repeat (20 copies)	Adiponectin OS=Bos taurus OX=9913 GN=ADIPOQ PE=1 SV=1	S	Function unknown	PREDICTED: complement C1q tumor necrosis factor-related protein 6 [Ovis aries]	cellular component: macromolecular complex (GO:0032991);; cellular component: extracellular region (GO:0005576);; cellular component: extracellular region part (GO:0044421);; molecular function: binding (GO:0005488);; biological process: cellular process (GO:0009987);; biological process: cellular component organization or biogenesis (GO:0071840)
C1R	11.4546	13.3203	12.1216	5.96948	5.77034	11.6842	18.5045	11.6132	8.60678	5.74555	7.52491	0.000494663	-0.8313	down	0.570933	0.255158	normal	0.0563098	-0.611366	normal	[O]	Posttranslational modification, protein turnover, chaperones	Molecular Function: serine-type endopeptidase activity (GO:0004252);; Molecular Function: calcium ion binding (GO:0005509);; Biological Process: proteolysis (GO:0006508);; Biological Process: complement activation (GO:0006956);; Cellular Component: extracellular exosome (GO:0070062);; Cellular Component: blood microparticle (GO:0072562);;	K01330|0|oas:101107430|K01330 complement component 1, r subcomponent [EC:3.4.21.41] | (RefSeq) C1R; complement C1r subcomponent	Phagosome (ko04145);; Complement and coagulation cascades (ko04610);; Pertussis (ko05133);; Staphylococcus aureus infection (ko05150);; Systemic lupus erythematosus (ko05322)	[E]	Amino acid transport and metabolism	Trypsin;; CUB domain;; Sushi repeat (SCR repeat);; Coagulation Factor Xa inhibitory site;; Complement Clr-like EGF-like	Complement C1r subcomponent OS=Pongo abelii OX=9601 GN=C1R PE=2 SV=1	O	Posttranslational modification, protein turnover, chaperones	PREDICTED: complement C1r subcomponent isoform X1 [Ovis aries]	molecular function: catalytic activity (GO:0003824);; biological process: metabolic process (GO:0008152);; molecular function: binding (GO:0005488);; biological process: immune system process (GO:0002376);; biological process: response to stimulus (GO:0050896);; biological process: biological regulation (GO:0065007);; cellular component: extracellular region (GO:0005576);; cellular component: org…
C1S	13.3657	12.5307	12.7404	5.92191	8.20265	7.61393	17.8916	12.0175	11.6045	8.13001	6.62092	0.0172113	-0.654776	down	0.954985	0.0495016	normal	0.241043	-0.439256	normal	[O]	Posttranslational modification, protein turnover, chaperones	Molecular Function: serine-type endopeptidase activity (GO:0004252);; Molecular Function: calcium ion binding (GO:0005509);; Biological Process: proteolysis (GO:0006508);; Biological Process: complement activation, classical pathway (GO:0006958);; Molecular Function: identical protein binding (GO:0042802);; Biological Process: innate immune response (GO:0045087);; Cellular Component: extracellula…	K01331|0|oas:101107688|K01331 complement component 1, s subcomponent [EC:3.4.21.42] | (RefSeq) C1S; complement C1s	Complement and coagulation cascades (ko04610);; Pertussis (ko05133);; Staphylococcus aureus infection (ko05150);; Systemic lupus erythematosus (ko05322)	[E]	Amino acid transport and metabolism	Trypsin;; CUB domain;; Sushi repeat (SCR repeat);; Coagulation Factor Xa inhibitory site;; Calcium-binding EGF domain	Complement C1s subcomponent OS=Bos taurus OX=9913 GN=C1S PE=2 SV=2	O	Posttranslational modification, protein turnover, chaperones	complement C1s subcomponent isoform X1 [Odocoileus virginianus texanus]	molecular function: catalytic activity (GO:0003824);; biological process: metabolic process (GO:0008152);; molecular function: binding (GO:0005488);; biological process: immune system process (GO:0002376);; biological process: response to stimulus (GO:0050896);; biological process: biological regulation (GO:0065007);; cellular component: extracellular region (GO:0005576);; cellular component: org…
C7	5.28611	5.02378	4.40792	1.0841	1.93097	2.46676	3.92294	3.75272	2.98368	1.98171	1.92554	3.81e-05	-1.19017	down	0.405492	-0.355907	normal	0.00137553	-0.878604	down	--	--	Cellular Component: membrane attack complex (GO:0005579);; Biological Process: complement activation, alternative pathway (GO:0006957);; Biological Process: complement activation, classical pathway (GO:0006958);; Biological Process: cytolysis (GO:0019835);; Cellular Component: extracellular exosome (GO:0070062);;	K03996|0|oas:101102931|K03996 complement component 7 | (RefSeq) C7; complement C7	Complement and coagulation cascades (ko04610);; Prion diseases (ko05020);; Systemic lupus erythematosus (ko05322)	--	--	MAC/Perforin domain;; Sushi repeat (SCR repeat);; Low-density lipoprotein receptor domain class A;; Thrombospondin type 1 domain	Complement component C7 OS=Bos taurus OX=9913 GN=C7 PE=2 SV=1	O	Posttranslational modification, protein turnover, chaperones	PREDICTED: complement component C7 isoform X1 [Ovis aries musimon]	cellular component: cell (GO:0005623);; cellular component: membrane (GO:0016020);; cellular component: macromolecular complex (GO:0032991);; cellular component: membrane part (GO:0044425);; cellular component: cell part (GO:0044464);; biological process: immune system process (GO:0002376);; biological process: metabolic process (GO:0008152);; biological process: response to stimulus (GO:0050896)…
gene-CACNA1A	0.490042	0.379807	0.351188	0.106211	0.224215	0.128389	0.149612	0.202806	0.249189	0.164696	0.185563	0.183831	-0.676365	normal	0.0333471	-0.823459	down	0.11973	-0.675623	normal	--	--	Biological Process: sulfur amino acid metabolic process (GO:0000096);; Cellular Component: nucleus (GO:0005634);; Cellular Component: cytoplasm (GO:0005737);; Cellular Component: voltage-gated calcium channel complex (GO:0005891);; Biological Process: glucose metabolic process (GO:0006006);; Biological Process: positive regulation of cytosolic calcium ion concentration (GO:0007204);; Biological P…	K04344|0|bta:282648|K04344 voltage-dependent calcium channel P/Q type alpha-1A | (RefSeq) CACNA1A, CAV2.1; calcium voltage-gated channel subunit alpha1 A	MAPK signaling pathway (ko04010);; Calcium signaling pathway (ko04020);; Synaptic vesicle cycle (ko04721);; Retrograde endocannabinoid signaling (ko04723);; Glutamatergic synapse (ko04724);; Cholinergic synapse (ko04725);; Serotonergic synapse (ko04726);; GABAergic synapse (ko04727);; Dopaminergic synapse (ko04728);; Long-term depression (ko04730);; Taste transduction (ko04742);; Type II diabetes…	[PT]	Inorganic ion transport and metabolism;; Signal transduction mechanisms	Ion transport protein;; Voltage-dependent L-type calcium channel, IQ-associated;; Voltage gated calcium channel IQ domain;; Polycystin cation channel	Voltage-dependent P/Q-type calcium channel subunit alpha-1A OS=Oryctolagus cuniculus OX=9986 GN=CACNA1A PE=1 SV=1	U	Intracellular trafficking, secretion, and vesicular transport	PREDICTED: voltage-dependent P/Q-type calcium channel subunit alpha-1A isoform X7 [Capra hircus]	biological process: metabolic process (GO:0008152);; biological process: cellular process (GO:0009987);; biological process: single-organism process (GO:0044699);; cellular component: cell (GO:0005623);; cellular component: organelle (GO:0043226);; cellular component: cell part (GO:0044464);; cellular component: membrane (GO:0016020);; cellular component: macromolecular complex (GO:0032991);; cel…
gene-CACNG7	1.47528	1.28923	1.00533	0.425554	1.20883	0.326417	0.32219	0.47268	0.685613	0.636002	0.681355	0.768949	-0.258844	normal	0.0031574	-1.05199	down	0.1772	-0.610415	normal	--	--	Molecular Function: voltage-gated ion channel activity (GO:0005244);; Molecular Function: calcium channel activity (GO:0005262);; Cellular Component: integral component of membrane (GO:0016021);; Biological Process: calcium ion transmembrane transport (GO:0070588);; Biological Process: regulation of AMPA receptor activity (GO:2000311);;	K04872|0|tup:102482749|K04872 voltage-dependent calcium channel gamma-7 | (RefSeq) CACNG7; calcium voltage-gated channel auxiliary subunit gamma 7	MAPK signaling pathway (ko04010);; Cardiac muscle contraction (ko04260);; Adrenergic signaling in cardiomyocytes (ko04261);; Oxytocin signaling pathway (ko04921);; Hypertrophic cardiomyopathy (HCM) (ko05410);; Arrhythmogenic right ventricular cardiomyopathy (ARVC) (ko05412);; Dilated cardiomyopathy (ko05414)	--	--	PMP-22/EMP/MP20/Claudin tight junction;; PMP-22/EMP/MP20/Claudin family	--	U	Intracellular trafficking, secretion, and vesicular transport	PREDICTED: voltage-dependent calcium channel gamma-7 subunit [Myotis brandtii]	molecular function: transporter activity (GO:0005215);; biological process: localization (GO:0051179);; biological process: biological regulation (GO:0065007);; cellular component: membrane (GO:0016020);; cellular component: membrane part (GO:0044425)
gene-CADM2	0.25731	0.296667	0.199396	0.092402	0.128768	0.089672	0.052574	0.080253	0.118404	0.206725	0.046559	0.295471	-0.588019	normal	0.0289644	-0.899692	down	0.451095	-0.434314	normal	--	--	Molecular Function: receptor activity (GO:0004872);; Molecular Function: receptor binding (GO:0005102);; Cellular Component: integral component of plasma membrane (GO:0005887);; Cellular Component: cell-cell adherens junction (GO:0005913);; Biological Process: homophilic cell adhesion via plasma membrane adhesion molecules (GO:0007156);; Biological Process: heterophilic cell-cell adhesion via pla…	K06782|1.213e-111|phd:102329026|K06782 cell adhesion molecule 2 | (RefSeq) CADM2; cell adhesion molecule 2	--	--	--	Immunoglobulin I-set domain;; Immunoglobulin domain;; Immunoglobulin domain;; Immunoglobulin domain;; CD80-like C2-set immunoglobulin domain	Contactin-associated protein-like 2 OS=Pongo abelii OX=9601 GN=CNTNAP2 PE=2 SV=1	U	Intracellular trafficking, secretion, and vesicular transport	PREDICTED: cell adhesion molecule 2 isoform X2 [Orcinus orca]	molecular function: molecular transducer activity (GO:0060089);; molecular function: binding (GO:0005488);; cellular component: cell (GO:0005623);; cellular component: membrane (GO:0016020);; cellular component: membrane part (GO:0044425);; cellular component: cell part (GO:0044464);; cellular component: cell junction (GO:0030054);; biological process: biological adhesion (GO:0022610);; biologica…
gene-CALCR	0.61171	0.366786	0.732622	0.311127	0.280635	0.109681	0.127744	0.206148	0.335841	0.284103	0.107173	0.50315	-0.436417	normal	0.0203576	-0.944908	down	0.278197	-0.5574	normal	--	--	Cellular Component: acrosomal vesicle (GO:0001669);; Molecular Function: calcitonin receptor activity (GO:0004948);; Cellular Component: cilium (GO:0005929);; Biological Process: cell surface receptor signaling pathway (GO:0007166);; Biological Process: adenylate cyclase-activating G-protein coupled receptor signaling pathway (GO:0007189);; Biological Process: positive regulation of cytosolic cal…	K04576|0|chx:102184585|K04576 calcitonin receptor | (RefSeq) CALCR; calcitonin receptor	Neuroactive ligand-receptor interaction (ko04080);; Osteoclast differentiation (ko04380)	[T]	Signal transduction mechanisms	7 transmembrane receptor (Secretin family);; Hormone receptor domain	Calcitonin receptor OS=Sus scrofa OX=9823 GN=CALCR PE=2 SV=2	U	Intracellular trafficking, secretion, and vesicular transport	PREDICTED: calcitonin receptor [Ovis aries musimon]	cellular component: cell (GO:0005623);; cellular component: organelle (GO:0043226);; cellular component: cell part (GO:0044464);; molecular function: signal transducer activity (GO:0004871);; molecular function: molecular transducer activity (GO:0060089);; biological process: cellular process (GO:0009987);; biological process: signaling (GO:0023052);; biological process: single-organism process (…
gene-CASP3	1.24655	1.63374	2.05587	0.940994	1.11129	0.466578	0.832726	0.539122	1.49997	1.44395	1.43188	0.522432	-0.391242	normal	0.00614553	-0.943689	down	0.899122	-0.097723	normal	--	--	Biological Process: B cell homeostasis (GO:0001782);; Molecular Function: aspartic-type endopeptidase activity (GO:0004190);; Molecular Function: cyclin-dependent protein serine/threonine kinase inhibitor activity (GO:0004861);; Molecular Function: protein binding (GO:0005515);; Cellular Component: nucleus (GO:0005634);; Cellular Component: cytosol (GO:0005829);; Biological Process: cellular resp…	K02187|0|oas:443031|K02187 caspase 3 [EC:3.4.22.56] | (RefSeq) CASP3, CPP32; caspase 3	Platinum drug resistance (ko01524);; MAPK signaling pathway (ko04010);; p53 signaling pathway (ko04115);; Apoptosis (ko04210);; Apoptosis - multiple species (ko04215);; Natural killer cell mediated cytotoxicity (ko04650);; TNF signaling pathway (ko04668);; Serotonergic synapse (ko04726);; Non-alcoholic fatty liver disease (NAFLD) (ko04932);; AGE-RAGE signaling pathway in diabetic complications (k…	[D]	Cell cycle control, cell division, chromosome partitioning	Caspase domain	Caspase-3 OS=Bos taurus OX=9913 GN=CASP3 PE=2 SV=1	O	Posttranslational modification, protein turnover, chaperones	PREDICTED: caspase-3 [Ovis aries musimon]	biological process: immune system process (GO:0002376);; biological process: biological regulation (GO:0065007);; molecular function: catalytic activity (GO:0003824);; biological process: metabolic process (GO:0008152);; molecular function: molecular function regulator (GO:0098772);; molecular function: binding (GO:0005488);; cellular component: cell (GO:0005623);; cellular component: organelle (…
CCL21	14.1036	11.4606	15.5642	5.48534	6.30404	5.94194	19.2823	19.5712	16.1899	12.8854	13.0734	0.000379474	-0.918027	down	0.860851	0.156321	normal	0.916192	0.0673465	normal	--	--	Biological Process: establishment of T cell polarity (GO:0001768);; Biological Process: positive regulation of cell-matrix adhesion (GO:0001954);; Biological Process: monocyte chemotaxis (GO:0002548);; Cellular Component: extracellular space (GO:0005615);; Cellular Component: intracellular (GO:0005622);; Biological Process: inflammatory response (GO:0006954);; Biological Process: G-protein couple…	K16062|3.29521e-59|oas:101119957|K16062 C-C motif chemokine 21 | (RefSeq) CCL21; C-C motif chemokine ligand 21	Cytokine-cytokine receptor interaction (ko04060);; Chemokine signaling pathway (ko04062);; NF-kappa B signaling pathway (ko04064)	--	--	Small cytokines (intecrine/chemokine), interleukin-8 like	C-C motif chemokine 21 OS=Macaca mulatta OX=9544 GN=CCL21 PE=2 SV=1	O	Posttranslational modification, protein turnover, chaperones	PREDICTED: C-C motif chemokine 21 [Ovis aries]	biological process: immune system process (GO:0002376);; biological process: cellular process (GO:0009987);; biological process: single-organism process (GO:0044699);; biological process: biological regulation (GO:0065007);; biological process: locomotion (GO:0040011);; biological process: response to stimulus (GO:0050896);; biological process: localization (GO:0051179);; cellular component: extr…
gene-CCN1	72.6982	55.9288	87.1984	62.6628	24.7848	35.9199	32.8288	23.8683	36.8146	113.504	41.2252	0.575797	-0.372886	normal	0.000651943	-0.896654	down	0.944766	-0.0665501	normal	--	--	Biological Process: regulation of cell growth (GO:0001558);; Biological Process: intussusceptive angiogenesis (GO:0002041);; Biological Process: atrioventricular valve morphogenesis (GO:0003181);; Biological Process: apoptotic process involved in heart morphogenesis (GO:0003278);; Biological Process: ventricular septum development (GO:0003281);; Molecular Function: integrin binding (GO:0005178);;…	K06829|0|oas:100037673|K06829 cysteine rich protein 61 | (RefSeq) CYR61; cysteine rich angiogenic inducer 61	--	--	--	Cystine-knot domain;; Insulin-like growth factor binding protein;; von Willebrand factor type C domain	Protein CYR61 OS=Pan troglodytes OX=9598 GN=CYR61 PE=2 SV=1	O	Posttranslational modification, protein turnover, chaperones	PREDICTED: protein CYR61 isoform X1, partial [Ovis aries]	biological process: biological regulation (GO:0065007);; biological process: multicellular organismal process (GO:0032501);; biological process: developmental process (GO:0032502);; biological process: single-organism process (GO:0044699);; biological process: cellular process (GO:0009987);; molecular function: binding (GO:0005488);; cellular component: extracellular region (GO:0005576);; cellula…
gene-CD44	14.5179	12.985	14.8105	9.26833	12.5103	6.93421	10.5822	7.25631	9.06324	10.5633	10.7678	0.63124	-0.234689	normal	0.0125535	-0.58827	down	0.257863	-0.381046	normal	--	--	Molecular Function: hyalurononglucosaminidase activity (GO:0004415);; Molecular Function: cytokine receptor activity (GO:0004896);; Molecular Function: hyaluronic acid binding (GO:0005540);; Cellular Component: Golgi apparatus (GO:0005794);; Cellular Component: plasma membrane (GO:0005886);; Cellular Component: focal adhesion (GO:0005925);; Cellular Component: cell surface (GO:0009986);; Cellular…	K06256|0|chx:102182426|K06256 CD44 antigen | (RefSeq) CD44; CD44 molecule (Indian blood group)	ECM-receptor interaction (ko04512);; Hematopoietic cell lineage (ko04640);; Epstein-Barr virus infection (ko05169);; Proteoglycans in cancer (ko05205);; MicroRNAs in cancer (ko05206)	--	--	Extracellular link domain	CD44 antigen OS=Bos taurus OX=9913 GN=CD44 PE=2 SV=1	U	Intracellular trafficking, secretion, and vesicular transport	PREDICTED: CD44 antigen isoform X13 [Ovis aries musimon]	molecular function: catalytic activity (GO:0003824);; molecular function: signal transducer activity (GO:0004871);; molecular function: molecular transducer activity (GO:0060089);; biological process: cellular process (GO:0009987);; biological process: signaling (GO:0023052);; biological process: single-organism process (GO:0044699);; biological process: response to stimulus (GO:0050896);; biolog…
gene-CD93	45.9809	43.3102	32.927	19.5249	32.9549	14.3622	18.1311	14.313	20.681	34.2298	18.4617	0.440495	-0.407467	normal	1.22e-07	-1.10794	down	0.225285	-0.526319	normal	--	--	Molecular Function: complement component C1q binding (GO:0001849);; Biological Process: positive regulation of defense response to virus by host (GO:0002230);; Molecular Function: calcium ion binding (GO:0005509);; Cellular Component: plasma membrane (GO:0005886);; Cellular Component: cell surface (GO:0009986);; Cellular Component: integral component of membrane (GO:0016021);; Biological Process:…	K06702|0|chx:102172076|K06702 CDW93 antigen | (RefSeq) CD93; CD93 molecule	--	--	--	Complement Clr-like EGF-like;; Calcium-binding EGF domain;; Coagulation Factor Xa inhibitory site;; Lectin C-type domain;; EGF-like domain	Thrombomodulin OS=Canis lupus familiaris OX=9615 GN=THBD PE=2 SV=1	U	Intracellular trafficking, secretion, and vesicular transport	PREDICTED: complement component C1q receptor [Capra hircus]	molecular function: binding (GO:0005488);; biological process: biological regulation (GO:0065007);; cellular component: cell (GO:0005623);; cellular component: membrane (GO:0016020);; cellular component: cell part (GO:0044464);; cellular component: membrane part (GO:0044425);; biological process: biological adhesion (GO:0022610);; biological process: single-organism process (GO:0044699);; biologi…
CDH4	0.768281	1.10584	0.940205	0.404049	0.264479	0.201792	1.82747	1.34654	1.2386	1.43819	1.02689	0.0238214	-0.89052	down	0.875405	0.153787	normal	0.529361	0.326688	normal	[U]	Intracellular trafficking, secretion, and vesicular transport	Molecular Function: calcium ion binding (GO:0005509);; Cellular Component: integral component of plasma membrane (GO:0005887);; Biological Process: homophilic cell adhesion via plasma membrane adhesion molecules (GO:0007156);; Biological Process: heterophilic cell-cell adhesion via plasma membrane cell adhesion molecules (GO:0007157);; Biological Process: axon guidance (GO:0007411);; Biological P…	K06797|0|chx:102173482|K06797 cadherin 4, type 1, R-cadherin | (RefSeq) CDH4; cadherin 4	Cell adhesion molecules (CAMs) (ko04514)	[S]	Function unknown	Cadherin domain;; Cadherin cytoplasmic region;; Cadherin prodomain like;; Cadherin-like;; Putative Ig domain;; Cadherin-like	Cadherin-2 OS=Pongo abelii OX=9601 GN=CDH2 PE=2 SV=1	U	Intracellular trafficking, secretion, and vesicular transport	PREDICTED: cadherin-4 isoform X3 [Ovis aries musimon]	molecular function: binding (GO:0005488);; cellular component: cell (GO:0005623);; cellular component: membrane (GO:0016020);; cellular component: membrane part (GO:0044425);; cellular component: cell part (GO:0044464);; biological process: biological adhesion (GO:0022610);; biological process: cellular process (GO:0009987);; biological process: multicellular organismal process (GO:0032501);; bio…
gene-CDH5	49.1514	39.3393	38.2581	21.5877	29.7056	23.001	23.6797	21.3115	19.7244	28.3104	19.3984	0.129443	-0.521682	normal	0.00136497	-0.685526	down	0.0164542	-0.719675	down	[U]	Intracellular trafficking, secretion, and vesicular transport	Biological Process: blood vessel maturation (GO:0001955);; Molecular Function: receptor binding (GO:0005102);; Molecular Function: calcium ion binding (GO:0005509);; Cellular Component: adherens junction (GO:0005912);; Cellular Component: bicellular tight junction (GO:0005923);; Biological Process: cell-cell junction assembly (GO:0007043);; Biological Process: homophilic cell adhesion via plasma …	K06533|0|chx:102174054|K06533 cadherin 5, type 2, VE-cadherin | (RefSeq) CDH5; cadherin 5	Cell adhesion molecules (CAMs) (ko04514);; Leukocyte transendothelial migration (ko04670)	[S]	Function unknown	Cadherin domain;; Cadherin cytoplasmic region;; Cadherin-like	Cadherin-5 OS=Bos taurus OX=9913 GN=CDH5 PE=2 SV=1	U	Intracellular trafficking, secretion, and vesicular transport	PREDICTED: cadherin-5 isoform X2 [Ovis aries musimon]	biological process: developmental process (GO:0032502);; biological process: single-organism process (GO:0044699);; molecular function: binding (GO:0005488);; cellular component: cell junction (GO:0030054);; biological process: cellular process (GO:0009987);; biological process: cellular component organization or biogenesis (GO:0071840);; biological process: biological adhesion (GO:0022610);; bio…
gene-CELSR1	0.487581	0.379018	0.496749	0.288142	0.237584	0.186072	0.279633	0.203807	0.165601	0.15428	0.163413	0.304232	-0.500798	normal	0.0298123	-0.717517	down	0.000131705	-1.09707	down	[U]	Intracellular trafficking, secretion, and vesicular transport	--	K04600|0|lve:103085146|K04600 cadherin EGF LAG seven-pass G-type receptor 1 | (RefSeq) CELSR1; cadherin EGF LAG seven-pass G-type receptor 1	--	[T]	Signal transduction mechanisms	Cadherin domain;; GPCR-Autoproteolysis INducing (GAIN) domain;; 7 transmembrane receptor (Secretin family);; Laminin G domain;; Laminin G domain;; Cadherin-like;; GPCR proteolysis site, GPS, motif;; EGF-like domain;; Hormone receptor domain;; Laminin EGF domain;; Human growth factor-like EGF;; Cadherin prodomain like;; Slime mold cyclic AMP receptor	Protocadherin-11 X-linked OS=Pan paniscus OX=9597 GN=PCDH11X PE=3 SV=1	S	Function unknown	PREDICTED: LOW QUALITY PROTEIN: cadherin EGF LAG seven-pass G-type receptor 1 [Capra hircus]	--
gene-CHN2	1.45364	1.37968	1.32406	1.23398	1.23928	0.57955	0.515618	0.538855	2.03611	0.928813	1.01688	0.969516	-0.0402993	normal	0.00324346	-0.926791	down	0.975838	-0.0299921	normal	--	--	Molecular Function: GTPase activator activity (GO:0005096);; Cellular Component: cytoplasm (GO:0005737);; Biological Process: positive regulation of GTPase activity (GO:0043547);; Molecular Function: metal ion binding (GO:0046872);; Biological Process: regulation of small GTPase mediated signal transduction (GO:0051056);;	K20630|0|oas:101103716|K20630 chimaerin | (RefSeq) CHN2; chimerin 2	--	[T]	Signal transduction mechanisms	RhoGAP domain;; Phorbol esters/diacylglycerol binding domain (C1 domain);; SH2 domain	N-chimaerin OS=Bos taurus OX=9913 GN=CHN1 PE=2 SV=1	S	Function unknown	PREDICTED: beta-chimaerin [Ovis aries]	molecular function: molecular function regulator (GO:0098772);; biological process: biological regulation (GO:0065007);; cellular component: cell (GO:0005623);; cellular component: cell part (GO:0044464);; molecular function: binding (GO:0005488)
gene-CHST1	2.59595	2.43532	2.47901	1.07777	2.19515	2.26655	1.5253	1.86865	0.95773	1.07067	0.809316	0.62125	-0.338035	normal	0.789313	-0.192646	normal	0.000152598	-1.05951	down	--	--	Cellular Component: Golgi membrane (GO:0000139);; Molecular Function: N-acetylglucosamine 6-O-sulfotransferase activity (GO:0001517);; Biological Process: galactose metabolic process (GO:0006012);; Cellular Component: integral component of membrane (GO:0016021);; Biological Process: keratan sulfate metabolic process (GO:0042339);; Molecular Function: keratan sulfotransferase activity (GO:0045130)…	K01022|0|bta:506932|K01022 keratan sulfate 6-sulfotransferase 1 [EC:2.8.2.21] | (RefSeq) CHST1; carbohydrate sulfotransferase 1	Glycosaminoglycan biosynthesis - keratan sulfate (ko00533)	--	--	Sulfotransferase domain;; Sulfotransferase family	--	S	Function unknown	PREDICTED: carbohydrate sulfotransferase 1 [Ovis aries musimon]	cellular component: cell (GO:0005623);; cellular component: membrane (GO:0016020);; cellular component: organelle (GO:0043226);; cellular component: organelle part (GO:0044422);; cellular component: cell part (GO:0044464);; molecular function: catalytic activity (GO:0003824);; biological process: metabolic process (GO:0008152);; biological process: single-organism process (GO:0044699);; cellular …
gene-CHST2	1.73608	2.62232	1.67078	1.11738	1.12271	0.987404	0.801751	0.685225	1.07224	0.993907	1.18073	0.311831	-0.523322	normal	0.0210812	-0.836945	down	0.118986	-0.641327	normal	--	--	Cellular Component: Golgi membrane (GO:0000139);; Molecular Function: N-acetylglucosamine 6-O-sulfotransferase activity (GO:0001517);; Cellular Component: trans-Golgi network (GO:0005802);; Biological Process: carbohydrate metabolic process (GO:0005975);; Biological Process: N-acetylglucosamine metabolic process (GO:0006044);; Biological Process: sulfur compound metabolic process (GO:0006790);; C…	K04745|0|bta:615978|K04745 carbohydrate 6-sulfotransferase 2 [EC:2.8.2.-] | (RefSeq) CHST2; carbohydrate sulfotransferase 2	Glycosaminoglycan biosynthesis - keratan sulfate (ko00533)	--	--	Sulfotransferase domain;; Sulfotransferase family	--	U	Intracellular trafficking, secretion, and vesicular transport	carbohydrate sulfotransferase 2 [Odocoileus virginianus texanus]	cellular component: cell (GO:0005623);; cellular component: membrane (GO:0016020);; cellular component: organelle (GO:0043226);; cellular component: organelle part (GO:0044422);; cellular component: cell part (GO:0044464);; molecular function: catalytic activity (GO:0003824);; biological process: metabolic process (GO:0008152);; biological process: cellular process (GO:0009987);; cellular compone…
CISH	27.7426	48.1421	45.5767	12.5724	11.759	30.4311	20.5033	6.64915	4.25485	20.0686	60.7619	1.85e-05	-1.22091	down	0.597006	-0.358032	normal	0.909713	-0.082531	normal	--	--	Molecular Function: protein kinase inhibitor activity (GO:0004860);; Cellular Component: cytoplasm (GO:0005737);; Cellular Component: plasma membrane (GO:0005886);; Biological Process: negative regulation of protein kinase activity (GO:0006469);; Biological Process: protein kinase C-activating G-protein coupled receptor signaling pathway (GO:0007205);; Biological Process: protein ubiquitination (…	K04701|6.22069e-169|oas:101119259|K04701 cytokine inducible SH2-containing protein | (RefSeq) CISH; cytokine inducible SH2 containing protein	Jak-STAT signaling pathway (ko04630);; Prolactin signaling pathway (ko04917)	[T]	Signal transduction mechanisms	SH2 domain;; SOCS box	Cytokine-inducible SH2-containing protein OS=Bos taurus OX=9913 GN=CISH PE=2 SV=1	O	Posttranslational modification, protein turnover, chaperones	PREDICTED: cytokine-inducible SH2-containing protein isoform X1 [Ovis aries]	molecular function: molecular function regulator (GO:0098772);; biological process: biological regulation (GO:0065007);; cellular component: cell (GO:0005623);; cellular component: cell part (GO:0044464);; cellular component: membrane (GO:0016020);; biological process: cellular process (GO:0009987);; biological process: signaling (GO:0023052);; biological process: single-organism process (GO:0044…
CITED1	1.32921	1.70186	1.96444	0.458527	0.213711	0.305591	0.587421	1.11818	0.479506	0.175384	0.199457	0.0380465	-0.894805	down	0.432882	-0.485137	normal	0.0205251	-0.927085	down	--	--	Molecular Function: RNA polymerase II transcription coactivator activity (GO:0001105);; Biological Process: vasculogenesis (GO:0001570);; Biological Process: branching involved in ureteric bud morphogenesis (GO:0001658);; Molecular Function: chromatin binding (GO:0003682);; Cellular Component: nucleus (GO:0005634);; Cellular Component: cytosol (GO:0005829);; Biological Process: nucleocytoplasmic …	--	--	--	--	CITED	Cbp/p300-interacting transactivator 1 OS=Bos taurus OX=9913 GN=CITED1 PE=2 SV=1	K	Transcription	PREDICTED: cbp/p300-interacting transactivator 1 isoform X2 [Ovis aries musimon]	molecular function: transcription factor activity, protein binding (GO:0000988);; biological process: metabolic process (GO:0008152);; biological process: cellular process (GO:0009987);; biological process: biological regulation (GO:0065007);; biological process: developmental process (GO:0032502);; biological process: single-organism process (GO:0044699);; biological process: multicellular organ…
gene-CLCN5	2.08048	2.44022	1.99832	2.23713	0.862469	1.13879	1.38786	1.16614	1.33702	1.37893	1.24199	0.800297	-0.225292	normal	0.0188839	-0.613039	down	0.0569034	-0.587455	normal	[T]	Signal transduction mechanisms	Molecular Function: voltage-gated chloride channel activity (GO:0005247);; Cellular Component: lysosomal membrane (GO:0005765);; Biological Process: chloride transport (GO:0006821);; Cellular Component: integral component of membrane (GO:0016021);; Cellular Component: apical part of cell (GO:0045177);; Biological Process: regulation of anion transmembrane transport (GO:1903959);;	K05012|0|chx:102187202|K05012 chloride channel 3/4/5 | (RefSeq) CLCN5; chloride voltage-gated channel 5	--	[P]	Inorganic ion transport and metabolism	Voltage gated chloride channel;; CBS domain	H(+)/Cl(-) exchange transporter 5 OS=Sus scrofa OX=9823 GN=CLCN5 PE=2 SV=1	P	Inorganic ion transport and metabolism	PREDICTED: H(+)/Cl(-) exchange transporter 5 isoform X4 [Ovis aries]	molecular function: transporter activity (GO:0005215);; biological process: localization (GO:0051179);; biological process: biological regulation (GO:0065007);; cellular component: cell (GO:0005623);; cellular component: membrane (GO:0016020);; cellular component: organelle (GO:0043226);; cellular component: organelle part (GO:0044422);; cellular component: cell part (GO:0044464);; cellular compo…
gene-CMIP	7.43856	6.99744	7.80171	4.86223	5.07628	5.76469	4.40894	3.9815	5.0539	4.44264	4.32684	0.105747	-0.467601	normal	0.299474	-0.433905	normal	0.0177451	-0.586146	down	[K]	Transcription	--	--	--	--	--	Leucine Rich repeats (2 copies)	--	S	Function unknown	PREDICTED: C-Maf-inducing protein isoform X2 [Ovis aries musimon]	--
gene-CNR1	1.77593	0.892624	1.62802	0.225213	1.11132	0.71861	1.14881	0.892382	0.335591	0.469968	0.686643	0.543572	-0.409029	normal	0.487953	-0.381658	normal	0.019351	-0.914153	down	--	--	Molecular Function: cannabinoid receptor activity (GO:0004949);; Biological Process: adenylate cyclase-modulating G-protein coupled receptor signaling pathway (GO:0007188);; Biological Process: axonal fasciculation (GO:0007413);; Cellular Component: integral component of membrane (GO:0016021);; Cellular Component: axon (GO:0030424);; Cellular Component: growth cone (GO:0030426);; Biological Proce…	K04277|0|phd:102333666|K04277 cannabinoid receptor 1 | (RefSeq) CNR1; cannabinoid receptor 1	Rap1 signaling pathway (ko04015);; Neuroactive ligand-receptor interaction (ko04080);; Retrograde endocannabinoid signaling (ko04723)	[R]	General function prediction only	7 transmembrane receptor (rhodopsin family);; Serpentine type 7TM GPCR chemoreceptor Srsx;; Olfactory receptor;; Serpentine type 7TM GPCR chemoreceptor Srv;; Serpentine type 7TM GPCR chemoreceptor Srx	Cannabinoid receptor 1 OS=Pan troglodytes OX=9598 GN=CNR1 PE=2 SV=1	U	Intracellular trafficking, secretion, and vesicular transport	cannabinoid receptor 1 [Bos taurus]	molecular function: signal transducer activity (GO:0004871);; molecular function: molecular transducer activity (GO:0060089);; biological process: cellular process (GO:0009987);; biological process: signaling (GO:0023052);; biological process: single-organism process (GO:0044699);; biological process: response to stimulus (GO:0050896);; biological process: biological regulation (GO:0065007);; bio…
COL14A1	6.78896	5.35653	6.34752	3.44951	3.28341	3.92438	8.05868	6.45009	2.30582	2.68927	4.03998	0.00212248	-0.682637	down	0.907631	0.0913125	normal	0.0291704	-0.757997	down	--	--	Cellular Component: extracellular space (GO:0005615);; Cellular Component: extracellular matrix (GO:0031012);; Molecular Function: RNA binding (GO:0044822);; Cellular Component: extracellular exosome (GO:0070062);;	K08133|0|chx:102178089|K08133 collagen, type XIV, alpha | (RefSeq) COL14A1; collagen type XIV alpha 1 chain	Protein digestion and absorption (ko04974)	[W]	Extracellular structures	von Willebrand factor type A domain;; Fibronectin type III domain;; Collagen triple helix repeat (20 copies);; von Willebrand factor type A domain;; Purple acid Phosphatase, N-terminal domain;; Uncharacterised conserved protein (DUF2369);; Interferon-alpha/beta receptor, fibronectin type III	Collagen alpha-1(XII) chain (Fragment) OS=Oryctolagus cuniculus OX=9986 GN=COL12A1 PE=2 SV=1	U	Intracellular trafficking, secretion, and vesicular transport	PREDICTED: collagen alpha-1(XIV) chain isoform X3 [Ovis aries musimon]	cellular component: extracellular region (GO:0005576);; cellular component: extracellular region part (GO:0044421);; cellular component: organelle (GO:0043226)
gene-COL1A2	182.52	142.978	121.948	88.5259	108.208	56.9059	152.147	90.3342	84.6797	77.8836	93.7976	0.333619	-0.410169	normal	0.487953	-0.376408	normal	0.0291704	-0.649082	down	--	--	Biological Process: skeletal system development (GO:0001501);; Biological Process: blood vessel development (GO:0001568);; Molecular Function: extracellular matrix structural constituent (GO:0005201);; Cellular Component: collagen type I trimer (GO:0005584);; Cellular Component: extracellular space (GO:0005615);; Cellular Component: intracellular (GO:0005622);; Biological Process: transforming gr…	K06236|0|bta:282188|K06236 collagen, type I, alpha | (RefSeq) COL1A2; collagen type I alpha 2 chain	PI3K-Akt signaling pathway (ko04151);; Focal adhesion (ko04510);; ECM-receptor interaction (ko04512);; Platelet activation (ko04611);; AGE-RAGE signaling pathway in diabetic complications (ko04933);; Protein digestion and absorption (ko04974);; Amoebiasis (ko05146)	[W]	Extracellular structures	Collagen triple helix repeat (20 copies);; Fibrillar collagen C-terminal domain	Collagen alpha-2(I) chain OS=Bos taurus OX=9913 GN=COL1A2 PE=1 SV=2	S	Function unknown	collagen alpha-2(I) chain precursor [Bos taurus]	biological process: multicellular organismal process (GO:0032501);; biological process: developmental process (GO:0032502);; biological process: single-organism process (GO:0044699);; molecular function: structural molecule activity (GO:0005198);; cellular component: extracellular region (GO:0005576);; cellular component: macromolecular complex (GO:0032991);; cellular component: extracellular reg…
COLEC12	10.9124	11.0365	10.035	5.60373	6.73029	6.56896	6.69883	8.92115	5.05309	7.74767	7.08782	0.0192365	-0.604089	down	0.445729	-0.329629	normal	0.176834	-0.518792	normal	[R]	General function prediction only	Cellular Component: collagen trimer (GO:0005581);; Biological Process: phagocytosis, recognition (GO:0006910);; Molecular Function: signaling pattern recognition receptor activity (GO:0008329);; Cellular Component: integral component of membrane (GO:0016021);; Molecular Function: low-density lipoprotein particle binding (GO:0030169);; Molecular Function: carbohydrate binding (GO:0030246);; Biolog…	K10062|0|bta:504741|K10062 collectin sub-family member 12 | (RefSeq) COLEC12; collectin subfamily member 12	Phagosome (ko04145)	--	--	Collagen triple helix repeat (20 copies);; Lectin C-type domain	Collectin-12 OS=Bos taurus OX=9913 GN=COLEC12 PE=2 SV=1	U	Intracellular trafficking, secretion, and vesicular transport	collectin-12 [Bos taurus]	cellular component: macromolecular complex (GO:0032991);; biological process: cellular process (GO:0009987);; biological process: single-organism process (GO:0044699);; molecular function: signal transducer activity (GO:0004871);; molecular function: molecular transducer activity (GO:0060089);; biological process: signaling (GO:0023052);; biological process: response to stimulus (GO:0050896);; bi…
DDR2	7.8495	6.79638	6.31208	3.92834	3.33569	6.24988	5.45306	4.90539	4.74539	4.24485	4.51792	0.0238214	-0.673358	down	0.750936	-0.178371	normal	0.0718842	-0.520213	normal	[M]	Cell wall/membrane/envelope biogenesis	Biological Process: endochondral bone growth (GO:0003416);; Molecular Function: collagen binding (GO:0005518);; Molecular Function: ATP binding (GO:0005524);; Cellular Component: integral component of plasma membrane (GO:0005887);; Cellular Component: focal adhesion (GO:0005925);; Biological Process: positive regulation of fibroblast migration (GO:0010763);; Biological Process: peptidyl-tyrosine …	K05125|0|chx:100860806|K05125 discoidin domain receptor family member 2 [EC:2.7.10.1] | (RefSeq) DDR2; discoidin domain receptor tyrosine kinase 2	--	[T]	Signal transduction mechanisms	Protein tyrosine kinase;; Protein kinase domain;; F5/8 type C domain	Epithelial discoidin domain-containing receptor 1 OS=Pan troglodytes OX=9598 GN=DDR1 PE=3 SV=1	T	Signal transduction mechanisms	PREDICTED: discoidin domain-containing receptor 2 isoform X1 [Ovis aries]	biological process: multicellular organismal process (GO:0032501);; biological process: developmental process (GO:0032502);; biological process: growth (GO:0040007);; biological process: single-organism process (GO:0044699);; molecular function: binding (GO:0005488);; cellular component: cell (GO:0005623);; cellular component: membrane (GO:0016020);; cellular component: membrane part (GO:0044425)…
DISP1	4.63971	5.25494	3.84583	2.1509	2.18575	2.54008	1.36808	1.73189	3.78715	3.96363	2.58164	0.00717913	-0.81564	down	0.0293468	-0.810605	down	0.528178	-0.309362	normal	--	--	Biological Process: patched ligand maturation (GO:0007225);; Biological Process: determination of left/right symmetry (GO:0007368);; Biological Process: embryonic pattern specification (GO:0009880);; Biological Process: dorsal/ventral pattern formation (GO:0009953);; Molecular Function: peptide transporter activity (GO:0015197);; Biological Process: peptide transport (GO:0015833);; Cellular Compo…	--	--	[T]	Signal transduction mechanisms	Patched family;; MMPL family;; Sterol-sensing domain of SREBP cleavage-activation	--	S	Function unknown	PREDICTED: protein dispatched homolog 1 isoform X3 [Ovis aries]	biological process: metabolic process (GO:0008152);; biological process: cellular process (GO:0009987);; biological process: single-organism process (GO:0044699);; biological process: biological regulation (GO:0065007);; biological process: multicellular organismal process (GO:0032501);; biological process: developmental process (GO:0032502);; molecular function: transporter activity (GO:0005215)…
gene-DLG2	0.97108	0.925481	0.725402	0.776152	0.889262	0.389572	0.428235	0.266134	0.345551	1.04556	0.388712	0.98288	0.0252997	normal	0.00895877	-0.86968	down	0.680425	-0.28201	normal	[F]	Nucleotide transport and metabolism	Molecular Function: guanylate kinase activity (GO:0004385);; Biological Process: chemical synaptic transmission (GO:0007268);; Biological Process: nervous system development (GO:0007399);; Cellular Component: ionotropic glutamate receptor complex (GO:0008328);; Biological Process: negative regulation of phosphatase activity (GO:0010923);; Cellular Component: postsynaptic density of dendrite (GO:0…	K12075|0|ocu:100345988|K12075 discs large protein 2 | (RefSeq) DLG2; discs large MAGUK scaffold protein 2	Hippo signaling pathway (ko04390)	[F]	Nucleotide transport and metabolism	Guanylate kinase;; PDZ domain (Also known as DHR or GLGF);; PDZ-associated domain of NMDA receptors;; PDZ domain;; Variant SH3 domain;; SH3 domain	MAGUK p55 subfamily member 5 OS=Pongo abelii OX=9601 GN=MPP5 PE=2 SV=1	F	Nucleotide transport and metabolism	disks large homolog 2 isoform X6 [Felis catus]	molecular function: catalytic activity (GO:0003824);; biological process: metabolic process (GO:0008152);; biological process: cellular process (GO:0009987);; biological process: single-organism process (GO:0044699);; biological process: signaling (GO:0023052);; biological process: multicellular organismal process (GO:0032501);; biological process: developmental process (GO:0032502);; cellular co…
DOCK4	2.71181	2.81786	2.389	1.47661	1.54249	2.17844	1.96725	2.06489	1.91991	2.20292	1.49327	0.046494	-0.598012	down	0.740678	-0.179969	normal	0.332431	-0.384574	normal	--	--	Molecular Function: guanyl-nucleotide exchange factor activity (GO:0005085);; Molecular Function: GTPase activator activity (GO:0005096);; Cellular Component: cytosol (GO:0005829);; Biological Process: small GTPase mediated signal transduction (GO:0007264);; Biological Process: positive regulation of smooth muscle cell migration (GO:0014911);; Cellular Component: membrane (GO:0016020);; Molecular…	K17697|0|oas:101113058|K17697 dedicator of cytokinesis protein 4 | (RefSeq) DOCK4; dedicator of cytokinesis 4	Rap1 signaling pathway (ko04015)	[T]	Signal transduction mechanisms	Dock homology region 2;; DOCK N-terminus;; C2 domain in Dock180 and Zizimin proteins;; Variant SH3 domain	--	S	Function unknown	PREDICTED: dedicator of cytokinesis protein 4 isoform X1 [Ovis aries]	molecular function: molecular function regulator (GO:0098772);; biological process: biological regulation (GO:0065007);; cellular component: cell (GO:0005623);; cellular component: cell part (GO:0044464);; biological process: cellular process (GO:0009987);; biological process: signaling (GO:0023052);; biological process: single-organism process (GO:0044699);; biological process: response to stimu…
DPY19L3	1.658	1.83977	1.80903	0.745704	0.646534	1.44657	1.14914	0.765619	0.669566	0.973719	0.884346	0.00519303	-0.935626	down	0.486722	-0.398562	normal	0.0531425	-0.761514	normal	--	--	Molecular Function: mannosyltransferase activity (GO:0000030);; Cellular Component: nuclear inner membrane (GO:0005637);; Cellular Component: integral component of membrane (GO:0016021);; Biological Process: protein C-linked glycosylation via 2'-alpha-mannosyl-L-tryptophan (GO:0018406);;	--	--	[S]	Function unknown	Q-cell neuroblast polarisation	Probable C-mannosyltransferase DPY19L3 OS=Pongo abelii OX=9601 GN=DPY19L3 PE=2 SV=1	U	Intracellular trafficking, secretion, and vesicular transport	PREDICTED: probable C-mannosyltransferase DPY19L3 [Ovis aries]	molecular function: catalytic activity (GO:0003824);; cellular component: cell (GO:0005623);; cellular component: membrane (GO:0016020);; cellular component: organelle (GO:0043226);; cellular component: organelle part (GO:0044422);; cellular component: cell part (GO:0044464);; cellular component: membrane part (GO:0044425);; biological process: metabolic process (GO:0008152);; biological process:…
gene-DPYD	5.86765	4.2948	4.1719	5.12059	1.9349	2.69594	1.75996	2.68954	4.11414	3.8805	2.56945	0.847479	-0.191541	normal	0.0315659	-0.735118	down	0.354078	-0.39586	normal	[ER]	Amino acid transport and metabolism;; General function prediction only	Cellular Component: cytosol (GO:0005829);; Biological Process: purine nucleobase catabolic process (GO:0006145);; Biological Process: thymine catabolic process (GO:0006210);; Biological Process: uracil catabolic process (GO:0006212);; Biological Process: thymidine catabolic process (GO:0006214);; Molecular Function: FMN binding (GO:0010181);; Molecular Function: dihydropyrimidine dehydrogenase (N…	K00207|0|oas:101109311|K00207 dihydropyrimidine dehydrogenase (NADP+) [EC:1.3.1.2] | (RefSeq) DPYD; dihydropyrimidine dehydrogenase	Pyrimidine metabolism (ko00240);; beta-Alanine metabolism (ko00410);; Pantothenate and CoA biosynthesis (ko00770);; Drug metabolism - other enzymes (ko00983)	[F]	Nucleotide transport and metabolism	Dihydroorotate dehydrogenase;; Dihydroprymidine dehydrogenase domain II, 4Fe-4S cluster;; 4Fe-4S dicluster domain;; Pyridine nucleotide-disulphide oxidoreductase;; NAD(P)-binding Rossmann-like domain;; Pyridine nucleotide-disulphide oxidoreductase;; Dihydrouridine synthase (Dus)	Dihydropyrimidine dehydrogenase [NADP(+)] OS=Bos taurus OX=9913 GN=DPYD PE=1 SV=1	F	Nucleotide transport and metabolism	PREDICTED: dihydropyrimidine dehydrogenase [NADP(+)] isoform X1 [Ovis aries]	cellular component: cell (GO:0005623);; cellular component: cell part (GO:0044464);; biological process: metabolic process (GO:0008152);; biological process: cellular process (GO:0009987);; biological process: single-organism process (GO:0044699);; molecular function: binding (GO:0005488);; molecular function: catalytic activity (GO:0003824)
gene-ECM2	20.6825	20.5523	18.3596	15.0428	15.0683	9.85111	13.5282	11.2088	15.7876	13.7456	14.7163	0.490857	-0.26088	normal	0.00188011	-0.609717	down	0.225285	-0.357014	normal	[K]	Transcription	Cellular Component: interstitial matrix (GO:0005614);; Cellular Component: extracellular space (GO:0005615);; Biological Process: axonogenesis (GO:0007409);; Molecular Function: heparin binding (GO:0008201);; Biological Process: positive regulation of cell-substrate adhesion (GO:0010811);; Biological Process: extracellular matrix organization (GO:0030198);; Molecular Function: collagen V binding …	K08119|0|bom:102277220|K08119 extracellular matrix protein 2 | (RefSeq) ECM2; extracellular matrix protein 2	--	[R]	General function prediction only	Leucine rich repeat;; Leucine Rich repeats (2 copies);; von Willebrand factor type C domain;; Leucine rich repeats (6 copies);; FNIP Repeat;; Leucine Rich Repeat	Extracellular matrix protein 2 OS=Bos taurus OX=9913 GN=ECM2 PE=2 SV=1	S	Function unknown	ECM2, partial [Cervus elaphus hippelaphus]	cellular component: extracellular region (GO:0005576);; cellular component: extracellular region part (GO:0044421);; biological process: cellular process (GO:0009987);; biological process: multicellular organismal process (GO:0032501);; biological process: developmental process (GO:0032502);; biological process: single-organism process (GO:0044699);; biological process: cellular component organiz…
gene-EFNB2	8.06657	8.20316	7.74978	4.82879	5.29073	5.05478	4.13282	5.40416	4.14572	4.93588	4.72084	0.0565959	-0.49869	normal	0.174622	-0.483851	normal	0.0100493	-0.661805	down	--	--	Biological Process: lymph vessel development (GO:0001945);; Biological Process: cell migration involved in sprouting angiogenesis (GO:0002042);; Cellular Component: plasma membrane (GO:0005886);; Cellular Component: focal adhesion (GO:0005925);; Biological Process: axon guidance (GO:0007411);; Biological Process: animal organ morphogenesis (GO:0009887);; Biological Process: negative regulation of…	K05463|0|oas:101115469|K05463 ephrin-B | (RefSeq) EFNB2; ephrin B2	Axon guidance (ko04360)	[T]	Signal transduction mechanisms	Ephrin	Ephrin-A1 OS=Bos taurus OX=9913 GN=EFNA1 PE=2 SV=1	S	Function unknown	PREDICTED: ephrin-B2 [Ovis aries]	biological process: developmental process (GO:0032502);; biological process: single-organism process (GO:0044699);; biological process: cellular process (GO:0009987);; biological process: multicellular organismal process (GO:0032501);; biological process: locomotion (GO:0040011);; biological process: localization (GO:0051179);; cellular component: cell (GO:0005623);; cellular component: membrane …
gene-EMILIN3	5.13671	4.47536	2.29656	2.05708	1.72409	1.26273	1.01662	0.878215	1.8636	3.517	2.4945	0.255526	-0.603543	normal	0.000213135	-1.20788	down	0.545033	-0.356155	normal	--	--	Cellular Component: cytoplasm (GO:0005737);;	--	--	--	--	EMI domain	--	S	Function unknown	PREDICTED: EMILIN-3 [Ovis aries musimon]	cellular component: cell (GO:0005623);; cellular component: cell part (GO:0044464)
gene-ENPP2	4.73851	4.23725	5.05292	3.37396	3.22824	2.00816	3.07582	2.48948	2.88006	2.98079	2.3765	0.248726	-0.436184	normal	0.021688	-0.614351	down	0.0609381	-0.572208	normal	[R]	General function prediction only	Molecular Function: nucleic acid binding (GO:0003676);; Molecular Function: phosphodiesterase I activity (GO:0004528);; Molecular Function: nucleotide diphosphatase activity (GO:0004551);; Molecular Function: lysophospholipase activity (GO:0004622);; Molecular Function: scavenger receptor activity (GO:0005044);; Molecular Function: calcium ion binding (GO:0005509);; Cellular Component: extracellu…	K01122|0|chx:102176626|K01122 ectonucleotide pyrophosphatase/phosphodiesterase family member 2 [EC:3.1.4.39] | (RefSeq) ENPP2; ectonucleotide pyrophosphatase/phosphodiesterase 2	Ether lipid metabolism (ko00565)	[R]	General function prediction only	Type I phosphodiesterase / nucleotide pyrophosphatase;; Somatomedin B domain;; DNA/RNA non-specific endonuclease	Ectonucleotide pyrophosphatase/phosphodiesterase family member 2 OS=Bos taurus OX=9913 GN=ENPP2 PE=1 SV=1	S	Function unknown	PREDICTED: ectonucleotide pyrophosphatase/phosphodiesterase family member 2 isoform X2 [Ovis aries]	molecular function: binding (GO:0005488);; molecular function: catalytic activity (GO:0003824);; biological process: metabolic process (GO:0008152);; biological process: cellular process (GO:0009987);; molecular function: molecular transducer activity (GO:0060089);; biological process: localization (GO:0051179);; cellular component: extracellular region (GO:0005576);; cellular component: extracel…
gene-EPHB4	11.3125	10.1747	11.9126	6.64551	8.46346	8.07898	6.79821	8.24387	6.39787	7.79899	5.95325	0.200843	-0.400488	normal	0.416156	-0.32892	normal	0.0254903	-0.601874	down	--		Biological Process: cell migration involved in sprouting angiogenesis (GO:0002042);; Molecular Function: ephrin receptor activity (GO:0005003);; Molecular Function: ATP binding (GO:0005524);; Cellular Component: integral component of plasma membrane (GO:0005887);; Biological Process: cell adhesion (GO:0007155);; Biological Process: peptidyl-tyrosine phosphorylation (GO:0018108);; Biological Proce…	K05113|0|phd:102316367|K05113 Eph receptor B4 [EC:2.7.10.1] | (RefSeq) EPHB4; EPH receptor B4	Axon guidance (ko04360)	[T]	Signal transduction mechanisms	Protein tyrosine kinase;; Ephrin receptor ligand binding domain;; Protein kinase domain;; Fibronectin type III domain;; Ephrin type-A receptor 2 transmembrane domain;; SAM domain (Sterile alpha motif);; SAM domain (Sterile alpha motif);; Putative ephrin-receptor like	Ephrin type-A receptor 2 OS=Macaca fascicularis OX=9541 GN=EPHA2 PE=2 SV=1	T	Signal transduction mechanisms	PREDICTED: ephrin type-B receptor 4 isoform X2 [Ovis aries musimon]	biological process: cellular process (GO:0009987);; biological process: multicellular organismal process (GO:0032501);; biological process: locomotion (GO:0040011);; biological process: single-organism process (GO:0044699);; biological process: localization (GO:0051179);; molecular function: catalytic activity (GO:0003824);; molecular function: signal transducer activity (GO:0004871);; molecular …
FAM124B	2.1657	2.62933	2.99987	0.855643	0.909644	0.349776	0.758956	0.40016	1.30086	1.1506	1.04478	0.000512352	-1.06838	down	8.35e-09	-1.61764	down	0.00553494	-0.869536	down	--	--	--	--	--	--	--	FAM124 family	Protein FAM124B OS=Bos taurus OX=9913 GN=FAM124B PE=2 SV=1	S	Function unknown	PREDICTED: protein FAM124B [Ovis aries]	--
gene-FAM89A	6.37024	5.10248	3.94011	2.92258	5.15093	1.76629	2.4224	2.32227	2.45437	5.86806	2.83264	0.873179	-0.159643	normal	0.008667	-0.858206	down	0.714569	-0.256013	normal	--	--	--	--	--	--	--	--	Protein FAM89A OS=Bos taurus OX=9913 GN=FAM89A PE=2 SV=1	S	Function unknown	PREDICTED: protein FAM89A isoform X2 [Ovis aries musimon]	--
gene-FAT4	1.74405	1.77942	1.87399	1.21161	1.17325	0.879714	1.23491	0.983727	1.30292	1.22663	1.35441	0.114657	-0.435432	normal	0.00135765	-0.622559	down	0.187297	-0.390245	normal	[U]	Intracellular trafficking, secretion, and vesicular transport	Biological Process: branching involved in ureteric bud morphogenesis (GO:0001658);; Biological Process: heart morphogenesis (GO:0003007);; Molecular Function: calcium ion binding (GO:0005509);; Cellular Component: intracellular (GO:0005622);; Cellular Component: plasma membrane (GO:0005886);; Biological Process: plasma membrane organization (GO:0007009);; Biological Process: homophilic cell adhes…	K16669|0|chx:102179034|K16669 protocadherin Fat 4 | (RefSeq) FAT4; FAT atypical cadherin 4	Hippo signaling pathway -multiple species (ko04392)	[S]	Function unknown	Cadherin domain;; Cadherin-like;; Laminin G domain;; Laminin G domain;; Cadherin-like;; EGF-like domain;; Calcium-binding EGF domain;; Human growth factor-like EGF;; EGF-like domain	Protocadherin-11 X-linked OS=Sus scrofa OX=9823 GN=PCDH11X PE=2 SV=1	S	Function unknown	PREDICTED: protocadherin Fat 4 isoform X2 [Ovis aries musimon]	biological process: multicellular organismal process (GO:0032501);; biological process: developmental process (GO:0032502);; biological process: single-organism process (GO:0044699);; molecular function: binding (GO:0005488);; cellular component: cell (GO:0005623);; cellular component: cell part (GO:0044464);; cellular component: membrane (GO:0016020);; biological process: cellular process (GO:00…
gene-FGL1	4.86052	6.48195	2.3956	1.93147	5.78923	1.22089	0.986947	1.40461	3.99041	3.88562	2.41207	0.955899	-0.0732855	normal	0.00597906	-1.04376	down	0.735807	-0.241797	normal	--	--	Cellular Component: extracellular exosome (GO:0070062);;	--	--	[R]	General function prediction only	Fibrinogen beta and gamma chains, C-terminal globular domain	Fibrinogen-like protein 1 OS=Bos taurus OX=9913 GN=FGL1 PE=2 SV=1	S	Function unknown	PREDICTED: fibrinogen-like protein 1 [Capra hircus]	cellular component: extracellular region (GO:0005576);; cellular component: organelle (GO:0043226);; cellular component: extracellular region part (GO:0044421)
FLT4	1.7368	1.18377	1.00215	0.429597	0.549288	0.750692	0.990668	0.802196	0.896133	0.87379	1.11899	0.0193111	-0.886081	down	0.446779	-0.389755	normal	0.607962	-0.291668	normal	[T]	Signal transduction mechanisms	Biological Process: positive regulation of endothelial cell proliferation (GO:0001938);; Biological Process: lymphangiogenesis (GO:0001946);; Biological Process: sprouting angiogenesis (GO:0002040);; Molecular Function: vascular endothelial growth factor-activated receptor activity (GO:0005021);; Molecular Function: ATP binding (GO:0005524);; Cellular Component: integral component of plasma membr…	K05097|0|chx:102180480|K05097 FMS-like tyrosine kinase 4 [EC:2.7.10.1] | (RefSeq) FLT4; fms related tyrosine kinase 4	Ras signaling pathway (ko04014);; Rap1 signaling pathway (ko04015);; Cytokine-cytokine receptor interaction (ko04060);; PI3K-Akt signaling pathway (ko04151);; Focal adhesion (ko04510)	[T]	Signal transduction mechanisms	Protein tyrosine kinase;; Immunoglobulin domain;; Immunoglobulin I-set domain;; Protein kinase domain;; Immunoglobulin domain;; Immunoglobulin domain;; Immunoglobulin V-set domain;; Izumo-like Immunoglobulin domain	Mast/stem cell growth factor receptor Kit OS=Callithrix jacchus OX=9483 GN=KIT PE=2 SV=1	T	Signal transduction mechanisms	PREDICTED: vascular endothelial growth factor receptor 3 isoform X3 [Ovis aries musimon]	biological process: biological regulation (GO:0065007);; biological process: developmental process (GO:0032502);; biological process: single-organism process (GO:0044699);; biological process: multicellular organismal process (GO:0032501);; molecular function: catalytic activity (GO:0003824);; molecular function: signal transducer activity (GO:0004871);; molecular function: molecular transducer a…
gene-FMOD	9.21924	3.37511	6.17634	2.91233	6.44709	2.59378	3.40976	3.62953	1.39881	2.03094	2.90316	0.875218	-0.165682	normal	0.233359	-0.57536	normal	0.0224321	-0.910927	down	[K]	Transcription	Cellular Component: proteinaceous extracellular matrix (GO:0005578);; Cellular Component: extracellular space (GO:0005615);; Molecular Function: heparin binding (GO:0008201);; Biological Process: collagen fibril organization (GO:0030199);; Biological Process: Roundabout signaling pathway (GO:0035385);; Molecular Function: Roundabout binding (GO:0048495);; Biological Process: axon extension involv…	K08121|0|chx:102183621|K08121 fibromodulin | (RefSeq) FMOD; fibromodulin	--	[R]	General function prediction only	Leucine rich repeat;; Leucine Rich repeats (2 copies);; Leucine-rich repeat;; Leucine Rich Repeat;; Leucine rich repeat N-terminal domain;; Leucine Rich repeat;; Leucine rich repeats (6 copies)	Fibromodulin OS=Bos taurus OX=9913 GN=FMOD PE=1 SV=2	S	Function unknown	PREDICTED: fibromodulin [Capra hircus]	cellular component: extracellular region (GO:0005576);; cellular component: extracellular region part (GO:0044421);; molecular function: binding (GO:0005488);; biological process: cellular process (GO:0009987);; biological process: single-organism process (GO:0044699);; biological process: cellular component organization or biogenesis (GO:0071840);; biological process: signaling (GO:0023052);; bi…
gene-FOXO6	3.19152	3.14363	1.05089	2.60542	3.40687	0.710444	0.910756	0.473098	1.51603	1.67403	2.48407	0.854211	0.190232	normal	0.0315659	-0.896156	down	0.82049	-0.182135	normal	--	--	Molecular Function: RNA polymerase II transcription factor activity, sequence-specific DNA binding (GO:0000981);; Cellular Component: nucleus (GO:0005634);; Cellular Component: cytoplasm (GO:0005737);; Biological Process: regulation of transcription from RNA polymerase II promoter (GO:0006357);; Biological Process: memory (GO:0007613);; Molecular Function: sequence-specific DNA binding (GO:004356…	K17847|0|lve:103078459|K17847 forkhead box protein O6 | (RefSeq) FOXO6; forkhead box O6	FoxO signaling pathway (ko04068)	[K]	Transcription	Forkhead domain;; Transactivation domain of FOXO protein family;; KIX-binding domain of forkhead box O, CR2	Forkhead box protein O1 OS=Bos taurus OX=9913 GN=FOXO1 PE=3 SV=2	K	Transcription	PREDICTED: forkhead box protein O6 isoform X2 [Ovis aries musimon]	molecular function: nucleic acid binding transcription factor activity (GO:0001071);; biological process: biological regulation (GO:0065007);; cellular component: cell (GO:0005623);; cellular component: organelle (GO:0043226);; cellular component: cell part (GO:0044464);; biological process: behavior (GO:0007610);; biological process: multicellular organismal process (GO:0032501);; biological pro…
FREM2	0.618177	0.482832	0.558763	0.14944	0.070186	0.439498	0.174071	0.249752	0.223617	0.416478	0.450629	6.93e-06	-1.39685	down	0.405492	-0.48651	normal	0.488835	-0.378833	normal	[S]	Function unknown	Biological Process: morphogenesis of an epithelium (GO:0002009);; Cellular Component: basement membrane (GO:0005604);; Biological Process: cell communication (GO:0007154);; Biological Process: heart development (GO:0007507);; Cellular Component: integral component of membrane (GO:0016021);; Biological Process: inner ear development (GO:0048839);; Cellular Component: extracellular exosome (GO:0070…	--	--	[R]	General function prediction only	Cadherin-like;; Calx-beta domain	Sodium/calcium exchanger 1 OS=Canis lupus familiaris OX=9615 GN=SLC8A1 PE=1 SV=1	S	Function unknown	PREDICTED: FRAS1-related extracellular matrix protein 2 isoform X2 [Ovis aries musimon]	biological process: developmental process (GO:0032502);; biological process: single-organism process (GO:0044699);; cellular component: extracellular region (GO:0005576);; cellular component: extracellular region part (GO:0044421);; biological process: cellular process (GO:0009987);; biological process: multicellular organismal process (GO:0032501);; cellular component: membrane (GO:0016020);; ce…
FSCN1	19.3815	18.5414	16.7113	9.79535	11.4174	13.9224	13.0096	11.6873	9.22335	15.478	9.08543	0.0192896	-0.596446	down	0.40731	-0.318524	normal	0.22331	-0.508075	normal	--	--	Cellular Component: stress fiber (GO:0001725);; Cellular Component: ruffle (GO:0001726);; Cellular Component: podosome (GO:0002102);; Cellular Component: cytoplasm (GO:0005737);; Cellular Component: microvillus (GO:0005902);; Cellular Component: cell-cell junction (GO:0005911);; Biological Process: cell-cell junction assembly (GO:0007043);; Molecular Function: drug binding (GO:0008144);; Biologic…	K17455|0|chx:102179537|K17455 fascin 1/2 | (RefSeq) FSCN1; fascin actin-bundling protein 1	--	--	--	Fascin domain;; FRG1-like domain	Fascin-2 OS=Bos taurus OX=9913 GN=FSCN2 PE=2 SV=1	O	Posttranslational modification, protein turnover, chaperones	PREDICTED: fascin isoform X3 [Ovis aries musimon]	cellular component: cell (GO:0005623);; cellular component: organelle (GO:0043226);; cellular component: organelle part (GO:0044422);; cellular component: cell part (GO:0044464);; cellular component: macromolecular complex (GO:0032991);; cellular component: cell junction (GO:0030054);; biological process: cellular process (GO:0009987);; biological process: single-organism process (GO:0044699);; b…
gene-FZD6	11.5952	6.91701	8.88367	5.57452	8.18935	3.39369	4.2673	2.8412	5.3419	5.37954	4.94837	0.746775	-0.227143	normal	2.21e-05	-1.04823	down	0.0452874	-0.637316	down	--	--	Biological Process: neural tube closure (GO:0001843);; Biological Process: hair follicle development (GO:0001942);; Molecular Function: G-protein coupled receptor activity (GO:0004930);; Biological Process: G-protein coupled receptor signaling pathway (GO:0007186);; Cellular Component: integral component of membrane (GO:0016021);; Cellular Component: apicolateral plasma membrane (GO:0016327);; Mo…	K02376|0|oas:101122197|K02376 frizzled 6 | (RefSeq) FZD6; frizzled class receptor 6	mTOR signaling pathway (ko04150);; Wnt signaling pathway (ko04310);; Hippo signaling pathway (ko04390);; Signaling pathways regulating pluripotency of stem cells (ko04550);; Melanogenesis (ko04916);; HTLV-I infection (ko05166);; Pathways in cancer (ko05200);; Proteoglycans in cancer (ko05205);; Basal cell carcinoma (ko05217)	[T]	Signal transduction mechanisms	Frizzled/Smoothened family membrane region;; Fz domain	Frizzled-6 OS=Canis lupus familiaris OX=9615 GN=FZD6 PE=2 SV=1	U	Intracellular trafficking, secretion, and vesicular transport	PREDICTED: frizzled-6 [Ovis aries musimon]	biological process: multicellular organismal process (GO:0032501);; biological process: developmental process (GO:0032502);; biological process: single-organism process (GO:0044699);; molecular function: signal transducer activity (GO:0004871);; molecular function: molecular transducer activity (GO:0060089);; biological process: cellular process (GO:0009987);; biological process: signaling (GO:00…
FZD7	18.0903	20.2566	24.5781	10.2377	9.55229	6.6082	14.4279	7.92611	23.3567	15.3636	21.2882	0.000243779	-0.845395	down	0.0046453	-0.833049	down	0.970887	-0.0264029	normal	--	--	Molecular Function: G-protein coupled receptor activity (GO:0004930);; Molecular Function: frizzled binding (GO:0005109);; Cellular Component: plasma membrane (GO:0005886);; Biological Process: G-protein coupled receptor signaling pathway (GO:0007186);; Biological Process: negative regulation of cell-substrate adhesion (GO:0010812);; Biological Process: skeletal muscle satellite cell maintenance …	K02432|0|phd:102319085|K02432 frizzled 1/7 | (RefSeq) FZD7; frizzled class receptor 7	mTOR signaling pathway (ko04150);; Wnt signaling pathway (ko04310);; Hippo signaling pathway (ko04390);; Signaling pathways regulating pluripotency of stem cells (ko04550);; Melanogenesis (ko04916);; HTLV-I infection (ko05166);; Pathways in cancer (ko05200);; Proteoglycans in cancer (ko05205);; Basal cell carcinoma (ko05217)	[T]	Signal transduction mechanisms	Frizzled/Smoothened family membrane region;; Fz domain	Frizzled-6 OS=Pongo abelii OX=9601 GN=FZD6 PE=2 SV=1	U	Intracellular trafficking, secretion, and vesicular transport	PREDICTED: LOW QUALITY PROTEIN: frizzled-7 [Pantholops hodgsonii]	molecular function: signal transducer activity (GO:0004871);; molecular function: molecular transducer activity (GO:0060089);; biological process: cellular process (GO:0009987);; biological process: signaling (GO:0023052);; biological process: single-organism process (GO:0044699);; biological process: response to stimulus (GO:0050896);; biological process: biological regulation (GO:0065007);; mol…
gene-GALNT18	4.5626	3.65264	3.92722	2.28869	2.33008	1.80692	2.08537	1.71639	2.13381	2.54765	2.24779	0.0826552	-0.584784	normal	0.000371102	-0.851371	down	0.0569034	-0.632548	normal	[G]	Carbohydrate transport and metabolism	Cellular Component: Golgi membrane (GO:0000139);; Biological Process: protein glycosylation (GO:0006486);; Cellular Component: integral component of membrane (GO:0016021);; Molecular Function: transferase activity, transferring glycosyl groups (GO:0016757);; Molecular Function: carbohydrate binding (GO:0030246);;	K00710|0|chx:102173105|K00710 polypeptide N-acetylgalactosaminyltransferase [EC:2.4.1.41] | (RefSeq) GALNT18; polypeptide N-acetylgalactosaminyltransferase 18	Mucin type O-Glycan biosynthesis (ko00512)	[O]	Posttranslational modification, protein turnover, chaperones	Glycosyl transferase family 2;; Ricin-type beta-trefoil lectin domain	Polypeptide N-acetylgalactosaminyltransferase 9 OS=Macaca fascicularis OX=9541 GN=GALNT9 PE=2 SV=1	S	Function unknown	PREDICTED: polypeptide N-acetylgalactosaminyltransferase 18 isoform X2 [Ovis aries musimon]	cellular component: cell (GO:0005623);; cellular component: membrane (GO:0016020);; cellular component: organelle (GO:0043226);; cellular component: organelle part (GO:0044422);; cellular component: cell part (GO:0044464);; biological process: metabolic process (GO:0008152);; biological process: cellular process (GO:0009987);; biological process: single-organism process (GO:0044699);; cellular co…
gene-GASK1B	19.7742	18.5878	11.3619	5.68861	12.1856	8.75722	7.56471	6.44539	11.9296	13.7074	10.8688	0.371014	-0.505972	normal	0.0266014	-0.766772	down	0.526094	-0.321966	normal	--	--	Cellular Component: Golgi apparatus (GO:0005794);;	--	--	--	--	FAM198 protein	--	U	Intracellular trafficking, secretion, and vesicular transport	PREDICTED: protein FAM198B isoform X3 [Ovis aries musimon]	cellular component: cell (GO:0005623);; cellular component: organelle (GO:0043226);; cellular component: cell part (GO:0044464)
gene-GASK1B-2	23.0433	22.7343	14.2155	7.91203	17.9259	10.0807	8.9132	7.08734	13.692	17.2828	12.1363	0.615939	-0.347245	normal	0.0066588	-0.846479	down	0.46747	-0.348553	normal	--	--	Cellular Component: Golgi apparatus (GO:0005794);; Cellular Component: integral component of membrane (GO:0016021);;	--	--	--	--	FAM198 protein	--	U	Intracellular trafficking, secretion, and vesicular transport	PREDICTED: protein FAM198B isoform X2 [Ovis aries]	cellular component: cell (GO:0005623);; cellular component: organelle (GO:0043226);; cellular component: cell part (GO:0044464);; cellular component: membrane (GO:0016020);; cellular component: membrane part (GO:0044425)
GCNA	3.0686	2.23492	3.09368	1.54471	1.61599	2.01072	2.2001	2.3997	1.56196	2.5473	1.52703	0.00843762	-0.787404	down	0.711917	-0.202737	normal	0.384782	-0.444819	normal	--	--	--	--	--	[S]	Function unknown	SprT-like family	--	S	Function unknown	PREDICTED: acidic repeat-containing protein isoform X1 [Ovis aries]	--
gene-GHSR	0.435902	0.332156	2.52365	0.126994	0.331772	0.156506	0.139544	0.122065	1.46634	0.220636	0.13746	0.399629	-0.476101	normal	0.0324163	-0.882403	down	0.85775	-0.140612	normal	--	--	Molecular Function: growth hormone secretagogue receptor activity (GO:0001616);; Cellular Component: plasma membrane (GO:0005886);; Biological Process: G-protein coupled receptor signaling pathway (GO:0007186);; Biological Process: actin polymerization or depolymerization (GO:0008154);; Biological Process: adult feeding behavior (GO:0008343);; Biological Process: hormone-mediated signaling pathwa…	K04284|0|oas:443238|K04284 growth hormone secretagogue receptor | (RefSeq) GHSR; growth hormone secretagogue receptor	cAMP signaling pathway (ko04024);; Neuroactive ligand-receptor interaction (ko04080)	[R]	General function prediction only	7 transmembrane receptor (rhodopsin family);; Serpentine type 7TM GPCR chemoreceptor Srw;; Serpentine type 7TM GPCR chemoreceptor Srsx	Growth hormone secretagogue receptor type 1 OS=Mustela putorius furo OX=9669 GN=GHSR PE=2 SV=1	U	Intracellular trafficking, secretion, and vesicular transport	growth hormone secretagogue receptor type 1 [Ovis aries]	molecular function: signal transducer activity (GO:0004871);; molecular function: molecular transducer activity (GO:0060089);; biological process: cellular process (GO:0009987);; biological process: signaling (GO:0023052);; biological process: single-organism process (GO:0044699);; biological process: response to stimulus (GO:0050896);; biological process: biological regulation (GO:0065007);; cel…
gene-HCLS1	3.27154	2.71993	2.18681	0.716642	1.72858	0.965536	1.40255	1.09142	2.21873	1.8221	1.41017	0.276626	-0.601199	normal	0.00792461	-0.864649	down	0.4087	-0.410039	normal	--	--	Biological Process: negative regulation of transcription from RNA polymerase II promoter (GO:0000122);; Molecular Function: RNA polymerase II transcription factor binding (GO:0001085);; Molecular Function: actin binding (GO:0003779);; Cellular Component: nucleus (GO:0005634);; Cellular Component: transcription factor complex (GO:0005667);; Cellular Component: Golgi apparatus (GO:0005794);; Biolog…	K06106|0|oas:101110196|K06106 cortactin | (RefSeq) HCLS1; hematopoietic cell-specific Lyn substrate 1	Tight junction (ko04530);; Bacterial invasion of epithelial cells (ko05100);; Proteoglycans in cancer (ko05205)	--	--	Repeat in HS1/Cortactin;; SH3 domain;; Variant SH3 domain;; Variant SH3 domain	Drebrin-like protein OS=Bos taurus OX=9913 GN=DBNL PE=2 SV=1	Z	Cytoskeleton	PREDICTED: hematopoietic lineage cell-specific protein [Ovis aries]	biological process: biological regulation (GO:0065007);; molecular function: binding (GO:0005488);; cellular component: cell (GO:0005623);; cellular component: organelle (GO:0043226);; cellular component: cell part (GO:0044464);; cellular component: macromolecular complex (GO:0032991);; biological process: response to stimulus (GO:0050896);; biological process: immune system process (GO:0002376);…
HIC1	5.50854	5.57147	5.26758	2.98536	3.27684	4.01183	5.49966	3.41605	3.41761	4.63541	3.59256	0.0468104	-0.596422	down	0.726519	-0.189449	normal	0.38045	-0.369156	normal	[R]	General function prediction only	Biological Process: negative regulation of transcription from RNA polymerase II promoter (GO:0000122);; Molecular Function: transcription factor activity, sequence-specific DNA binding (GO:0003700);; Cellular Component: nucleoplasm (GO:0005654);; Cellular Component: cytoplasm (GO:0005737);; Biological Process: intrinsic apoptotic signaling pathway in response to DNA damage (GO:0008630);; Biologic…	--	--	[R]	General function prediction only	BTB/POZ domain;; Zinc finger, C2H2 type;; C2H2-type zinc finger;; Zinc-finger double domain;; Zinc-finger double-stranded RNA-binding;; C2H2-type zinc finger;; Zinc-finger of C2H2 type	Zinc finger protein 22 OS=Bos taurus OX=9913 GN=ZNF22 PE=2 SV=1	S	Function unknown	hypermethylated in cancer 1 protein isoform X1 [Odocoileus virginianus texanus]	biological process: biological regulation (GO:0065007);; molecular function: nucleic acid binding transcription factor activity (GO:0001071);; cellular component: cell (GO:0005623);; cellular component: organelle (GO:0043226);; cellular component: organelle part (GO:0044422);; cellular component: cell part (GO:0044464);; biological process: cellular process (GO:0009987);; biological process: sign…
gene-HR	20.0619	28.6482	18.5849	23.4434	31.7533	10.5809	11.7622	7.7434	24.056	25.2113	19.5031	0.646959	0.288061	normal	0.00434435	-0.848927	down	0.978016	0.0231382	normal	--	--	Molecular Function: transcription corepressor activity (GO:0003714);; Cellular Component: nuclear body (GO:0016604);; Biological Process: negative regulation of transcription, DNA-templated (GO:0045892);;	K00478|0|oas:443241|K00478 lysine-specific demethylase hairless [EC:1.14.11.-] | (RefSeq) HR; HR, lysine demethylase and nuclear receptor corepressor	--	[K]	Transcription	JmjC domain, hydroxylase	--	S	Function unknown	PREDICTED: lysine-specific demethylase hairless isoform X1 [Ovis aries musimon]	molecular function: transcription factor activity, protein binding (GO:0000988);; biological process: biological regulation (GO:0065007);; cellular component: cell (GO:0005623);; cellular component: membrane-enclosed lumen (GO:0031974);; cellular component: organelle (GO:0043226);; cellular component: organelle part (GO:0044422);; cellular component: cell part (GO:0044464)
IER2	39.5774	26.1099	29.3833	17.1341	14.5496	24.3003	15.5886	21.321	20.9557	40.5306	14.2601	0.0165643	-0.729722	down	0.484995	-0.366859	normal	0.801586	-0.185884	normal	--	--	Molecular Function: DNA binding (GO:0003677);; Cellular Component: nucleoplasm (GO:0005654);; Cellular Component: cytoplasm (GO:0005737);; Biological Process: cell motility (GO:0048870);;	--	--	--	--	Immediate early response protein (IER)	--	O	Posttranslational modification, protein turnover, chaperones	PREDICTED: immediate early response gene 2 protein [Ovis aries musimon]	molecular function: binding (GO:0005488);; cellular component: cell (GO:0005623);; cellular component: organelle (GO:0043226);; cellular component: organelle part (GO:0044422);; cellular component: cell part (GO:0044464);; biological process: cellular process (GO:0009987);; biological process: locomotion (GO:0040011);; biological process: single-organism process (GO:0044699)
gene-IFIT2	2.04768	2.2508	2.37103	0.91961	1.75711	1.10048	1.16082	1.23591	2.0989	1.85904	1.27446	0.430346	-0.442754	normal	0.018251	-0.675838	down	0.628549	-0.25472	normal	--	--	Cellular Component: endoplasmic reticulum (GO:0005783);; Biological Process: negative regulation of protein binding (GO:0032091);; Biological Process: cellular response to interferon-alpha (GO:0035457);; Molecular Function: identical protein binding (GO:0042802);; Biological Process: positive regulation of apoptotic process (GO:0043065);; Molecular Function: RNA binding (GO:0044822);; Biological …	--	--	[R]	General function prediction only	Tetratricopeptide repeat;; Tetratricopeptide repeat;; Tetratricopeptide repeat;; Tetratricopeptide repeat;; Tetratricopeptide repeat;; TPR repeat;; Tetratricopeptide repeat;; Tetratricopeptide repeat;; Tetratricopeptide repeat;; Tetratricopeptide repeat;; Tetratricopeptide repeat;; Tetratricopeptide repeat;; Tetratricopeptide repeat	Interferon-induced protein with tetratricopeptide repeats 3 OS=Pan troglodytes OX=9598 GN=IFIT3 PE=2 SV=1	S	Function unknown	PREDICTED: interferon-induced protein with tetratricopeptide repeats 2 [Ovis aries musimon]	cellular component: cell (GO:0005623);; cellular component: organelle (GO:0043226);; cellular component: cell part (GO:0044464);; biological process: biological regulation (GO:0065007);; biological process: cellular process (GO:0009987);; biological process: response to stimulus (GO:0050896);; molecular function: binding (GO:0005488);; biological process: immune system process (GO:0002376);; biol…
gene-IGF1	8.38964	6.30129	7.55616	4.12651	4.88796	3.41098	3.75535	1.87268	4.64965	6.06648	5.15775	0.255967	-0.416995	normal	0.000883562	-0.935525	down	0.20503	-0.360957	normal	--	--	Molecular Function: insulin receptor binding (GO:0005158);; Molecular Function: insulin-like growth factor receptor binding (GO:0005159);; Molecular Function: integrin binding (GO:0005178);; Molecular Function: hormone activity (GO:0005179);; Cellular Component: cytosol (GO:0005829);; Molecular Function: growth factor activity (GO:0008083);; Biological Process: response to heat (GO:0009408);; Bio…	K05459|2.94298e-79|oas:443318|K05459 insulin-like growth factor 1 | (RefSeq) IGF1, IGF-I; insulin like growth factor 1	EGFR tyrosine kinase inhibitor resistance (ko01521);; Endocrine resistance (ko01522);; Ras signaling pathway (ko04014);; Rap1 signaling pathway (ko04015);; HIF-1 signaling pathway (ko04066);; FoxO signaling pathway (ko04068);; Oocyte meiosis (ko04114);; p53 signaling pathway (ko04115);; mTOR signaling pathway (ko04150);; PI3K-Akt signaling pathway (ko04151);; AMPK signaling pathway (ko04152);; Lo…	--	--	Insulin/IGF/Relaxin family	Insulin-like growth factor I OS=Ovis aries OX=9940 GN=IGF1 PE=1 SV=2	K	Transcription	Insulin-like growth factor I, partial [Pteropus alecto]	molecular function: binding (GO:0005488);; cellular component: cell (GO:0005623);; cellular component: cell part (GO:0044464);; biological process: response to stimulus (GO:0050896);; biological process: biological regulation (GO:0065007);; biological process: developmental process (GO:0032502);; biological process: cellular process (GO:0009987);; biological process: single-organism process (GO:0…
gene-IGFBP4	42.9691	62.9498	39.176	26.0561	31.8163	17.5219	24.515	24.085	30.0098	37.3619	26.1297	0.329201	-0.482916	normal	0.00727253	-0.821525	down	0.27856	-0.468317	normal	--	--	Biological Process: regulation of cell growth (GO:0001558);; Cellular Component: extracellular space (GO:0005615);; Biological Process: regulation of glucose metabolic process (GO:0010906);; Molecular Function: insulin-like growth factor I binding (GO:0031994);; Molecular Function: insulin-like growth factor II binding (GO:0031995);; Biological Process: positive regulation of MAPK cascade (GO:004…	--	--	--	--	Thyroglobulin type-1 repeat;; Insulin-like growth factor binding protein	Insulin-like growth factor-binding protein 4 OS=Bos taurus OX=9913 GN=IGFBP4 PE=2 SV=1	A	RNA processing and modification	insulin-like growth factor-binding protein 4 precursor [Capra hircus]	biological process: biological regulation (GO:0065007);; cellular component: extracellular region (GO:0005576);; cellular component: extracellular region part (GO:0044421);; molecular function: binding (GO:0005488);; biological process: single-organism process (GO:0044699)
gene-ISG15	3.21715	2.30151	2.70549	1.83724	2.34913	0.735031	0.5136	0.838496	1.38318	1.34114	1.29261	0.880201	-0.158812	normal	0.0156722	-0.96996	down	0.251827	-0.573109	normal	--	--	Cellular Component: extracellular region (GO:0005576);; Cellular Component: cytoplasm (GO:0005737);; Cellular Component: plasma membrane (GO:0005886);; Biological Process: G-protein coupled acetylcholine receptor signaling pathway (GO:0007213);; Biological Process: modification-dependent protein catabolic process (GO:0019941);; Molecular Function: protein tag (GO:0031386);; Biological Process: ne…	K12159|1.19649e-106|chx:102169982|K12159 ubiquitin cross-reactive protein | (RefSeq) ISG15, ISG17/UCRP; ISG15 ubiquitin-like modifier	RIG-I-like receptor signaling pathway (ko04622)	[OR]	Posttranslational modification, protein turnover, chaperones;; General function prediction only	Ubiquitin family;; Ubiquitin-2 like Rad60 SUMO-like	Ubiquitin-like protein ISG15 OS=Bos taurus OX=9913 GN=ISG15 PE=2 SV=3	O	Posttranslational modification, protein turnover, chaperones	PREDICTED: ubiquitin-like protein ISG15 [Capra hircus]	cellular component: extracellular region (GO:0005576);; cellular component: cell (GO:0005623);; cellular component: cell part (GO:0044464);; cellular component: membrane (GO:0016020);; biological process: cellular process (GO:0009987);; biological process: signaling (GO:0023052);; biological process: single-organism process (GO:0044699);; biological process: response to stimulus (GO:0050896);; bi…
gene-ITGA9	3.22401	2.29001	2.09789	1.24394	2.00914	1.12491	1.35437	1.203	1.56186	1.65867	1.90647	0.542095	-0.375134	normal	0.018327	-0.744065	down	0.374613	-0.406095	normal	[Q]	Secondary metabolites biosynthesis, transport and catabolism	Biological Process: cell adhesion (GO:0007155);; Biological Process: integrin-mediated signaling pathway (GO:0007229);; Cellular Component: integrin complex (GO:0008305);; Cellular Component: basal plasma membrane (GO:0009925);; Biological Process: neutrophil chemotaxis (GO:0030593);;	K06585|0|oas:101109832|K06585 integrin alpha 9 | (RefSeq) ITGA9; integrin subunit alpha 9	PI3K-Akt signaling pathway (ko04151);; Focal adhesion (ko04510);; ECM-receptor interaction (ko04512);; Cell adhesion molecules (CAMs) (ko04514);; Regulation of actin cytoskeleton (ko04810);; Hypertrophic cardiomyopathy (HCM) (ko05410);; Arrhythmogenic right ventricular cardiomyopathy (ARVC) (ko05412);; Dilated cardiomyopathy (ko05414)	[W]	Extracellular structures	Integrin alpha;; FG-GAP repeat;; Repeat domain in Vibrio, Colwellia, Bradyrhizobium and Shewanella;; FG-GAP repeat	Integrin alpha-3 OS=Bos taurus OX=9913 GN=ITGA3 PE=3 SV=1	U	Intracellular trafficking, secretion, and vesicular transport	PREDICTED: integrin alpha-9 isoform X1 [Ovis aries]	biological process: biological adhesion (GO:0022610);; biological process: cellular process (GO:0009987);; biological process: signaling (GO:0023052);; biological process: single-organism process (GO:0044699);; biological process: response to stimulus (GO:0050896);; biological process: biological regulation (GO:0065007);; cellular component: cell (GO:0005623);; cellular component: membrane (GO:00…
gene-ITM2C	31.0806	24.7702	27.3208	16.2697	19.6827	17.8404	22.9614	17.8423	17.2229	17.3286	15.4033	0.186296	-0.447582	normal	0.280116	-0.339818	normal	0.0160245	-0.614556	down	--	--	Molecular Function: amyloid-beta binding (GO:0001540);; Molecular Function: ATP binding (GO:0005524);; Cellular Component: lysosomal membrane (GO:0005765);; Cellular Component: Golgi apparatus (GO:0005794);; Cellular Component: plasma membrane (GO:0005886);; Biological Process: negative regulation of neuron projection development (GO:0010977);; Cellular Component: integral component of membrane (…	K18265|2.15714e-159|chx:102187089|K18265 integral membrane protein 2C | (RefSeq) ITM2C; integral membrane protein 2C	--	[S]	Function unknown	BRICHOS domain	Integral membrane protein 2C OS=Bos taurus OX=9913 GN=ITM2C PE=2 SV=1	S	Function unknown	PREDICTED: integral membrane protein 2C [Capra hircus]	molecular function: binding (GO:0005488);; cellular component: cell (GO:0005623);; cellular component: membrane (GO:0016020);; cellular component: organelle (GO:0043226);; cellular component: organelle part (GO:0044422);; cellular component: cell part (GO:0044464);; biological process: cellular process (GO:0009987);; biological process: multicellular organismal process (GO:0032501);; biological p…
JUP	14.6868	12.1684	14.0739	7.71629	7.88141	8.33286	11.7614	9.90498	8.01513	11.5434	7.16307	0.00255207	-0.619827	down	0.350008	-0.285337	normal	0.22331	-0.464274	normal	--	--	Biological Process: desmosome assembly (GO:0002159);; Molecular Function: transcription coactivator activity (GO:0003713);; Molecular Function: signal transducer activity (GO:0004871);; Molecular Function: structural molecule activity (GO:0005198);; Cellular Component: cytosol (GO:0005829);; Cellular Component: intermediate filament (GO:0005882);; Cellular Component: zonula adherens (GO:0005915);…	K10056|0|phd:102330342|K10056 junction plakoglobin | (RefSeq) JUP; junction plakoglobin	Pathways in cancer (ko05200);; Transcriptional misregulation in cancer (ko05202);; Acute myeloid leukemia (ko05221);; Arrhythmogenic right ventricular cardiomyopathy (ARVC) (ko05412)	[TZ]	Signal transduction mechanisms;; Cytoskeleton	Armadillo/beta-catenin-like repeat;; HEAT repeat;; V-ATPase subunit H	Junction plakoglobin OS=Bos taurus OX=9913 GN=JUP PE=2 SV=1	F	Nucleotide transport and metabolism	PREDICTED: junction plakoglobin [Pantholops hodgsonii]	biological process: cellular process (GO:0009987);; biological process: single-organism process (GO:0044699);; biological process: cellular component organization or biogenesis (GO:0071840);; molecular function: transcription factor activity, protein binding (GO:0000988);; biological process: biological regulation (GO:0065007);; molecular function: signal transducer activity (GO:0004871);; molecu…
gene-KCNB1	2.60204	2.47902	2.5873	2.88738	1.57531	1.21531	1.67695	1.27339	2.59919	1.12676	2.82494	0.957956	-0.0553635	normal	0.000168445	-0.696754	down	0.862597	-0.135286	normal	[T]	Signal transduction mechanisms	Molecular Function: delayed rectifier potassium channel activity (GO:0005251);; Cellular Component: intracellular (GO:0005622);; Biological Process: vesicle docking involved in exocytosis (GO:0006904);; Biological Process: glutamate receptor signaling pathway (GO:0007215);; Cellular Component: voltage-gated potassium channel complex (GO:0008076);; Biological Process: positive regulation of norepi…	K04885|0|oas:101121535|K04885 potassium voltage-gated channel Shab-related subfamily B member 1 | (RefSeq) KCNB1; potassium voltage-gated channel subfamily B member 1	--	[P]	Inorganic ion transport and metabolism	Kv2 voltage-gated K+ channel;; Ion transport protein;; BTB/POZ domain;; Ion channel	Potassium voltage-gated channel subfamily B member 1 OS=Sus scrofa OX=9823 GN=KCNB1 PE=2 SV=1	P	Inorganic ion transport and metabolism	PREDICTED: potassium voltage-gated channel subfamily B member 1 [Ovis aries]	molecular function: transporter activity (GO:0005215);; biological process: cellular process (GO:0009987);; biological process: single-organism process (GO:0044699);; biological process: localization (GO:0051179);; biological process: biological regulation (GO:0065007);; cellular component: cell (GO:0005623);; cellular component: cell part (GO:0044464);; biological process: signaling (GO:0023052)…
KCNJ2	6.78616	11.2561	7.55557	4.4919	2.52786	2.87104	3.82969	2.62904	12.0163	6.49412	5.81692	0.0361188	-0.814502	down	2.98e-05	-1.0821	down	0.927076	-0.0779742	normal	[S]	Function unknown	Molecular Function: inward rectifier potassium channel activity (GO:0005242);; Molecular Function: phosphatidylinositol-4,5-bisphosphate binding (GO:0005546);; Cellular Component: voltage-gated potassium channel complex (GO:0008076);; Biological Process: potassium ion import (GO:0010107);; Biological Process: regulation of skeletal muscle contraction via regulation of action potential (GO:0014861…	K04996|0|ptg:102967064|K04996 potassium inwardly-rectifying channel subfamily J member 2 | (RefSeq) KCNJ2; potassium voltage-gated channel subfamily J member 2	Cholinergic synapse (ko04725);; Oxytocin signaling pathway (ko04921);; Renin secretion (ko04924);; Gastric acid secretion (ko04971)	[P]	Inorganic ion transport and metabolism	Inward rectifier potassium channel;; Inward rectifier potassium channel N-terminal	Inward rectifier potassium channel 2 OS=Bos taurus OX=9913 GN=KCNJ2 PE=2 SV=1	U	Intracellular trafficking, secretion, and vesicular transport	Inward rectifier potassium channel 2 [Pteropus alecto]	molecular function: transporter activity (GO:0005215);; molecular function: molecular transducer activity (GO:0060089);; biological process: cellular process (GO:0009987);; biological process: single-organism process (GO:0044699);; biological process: localization (GO:0051179);; biological process: biological regulation (GO:0065007);; molecular function: binding (GO:0005488);; cellular component:…
gene-KCNMB1	1.91024	2.42801	2.07504	1.41932	1.26975	1.19234	1.40734	1.02508	1.48067	1.5864	0.838782	0.325435	-0.438953	normal	0.0468064	-0.614465	down	0.24473	-0.513052	normal	--	--	Biological Process: detection of calcium ion (GO:0005513);; Biological Process: chemical synaptic transmission (GO:0007268);; Cellular Component: voltage-gated potassium channel complex (GO:0008076);; Molecular Function: calcium-activated potassium channel activity (GO:0015269);; Molecular Function: potassium channel regulator activity (GO:0015459);; Biological Process: potassium ion transmembran…	K04937|1.33336e-93|oas:100302624|K04937 potassium large conductance calcium-activated channel subfamily M beta member 1 | (RefSeq) KCNMB1; potassium calcium-activated channel subfamily M regulatory beta subunit 1	cGMP-PKG signaling pathway (ko04022);; Vascular smooth muscle contraction (ko04270);; Insulin secretion (ko04911)	--	--	Calcium-activated potassium channel, beta subunit	Calcium-activated potassium channel subunit beta-1 OS=Bos taurus OX=9913 GN=KCNMB1 PE=1 SV=3	U	Intracellular trafficking, secretion, and vesicular transport	PREDICTED: calcium-activated potassium channel subunit beta-1 isoform X1 [Ovis aries]	biological process: response to stimulus (GO:0050896);; biological process: cellular process (GO:0009987);; biological process: signaling (GO:0023052);; biological process: single-organism process (GO:0044699);; cellular component: cell (GO:0005623);; cellular component: membrane (GO:0016020);; cellular component: macromolecular complex (GO:0032991);; cellular component: membrane part (GO:0044425…
gene-KCP	2.88316	2.58854	2.16773	1.06012	1.53632	1.23552	1.48181	1.07791	1.69329	2.03916	1.18483	0.0785961	-0.673088	normal	0.00597906	-0.752285	down	0.279263	-0.465656	normal	--	--	Biological Process: hematopoietic progenitor cell differentiation (GO:0002244);; Cellular Component: extracellular space (GO:0005615);; Biological Process: positive regulation of BMP signaling pathway (GO:0030513);;	--	--	[WV]	Extracellular structures;; Defense mechanisms	von Willebrand factor type C domain;; von Willebrand factor type D domain;; TILa domain	Zonadhesin OS=Sus scrofa OX=9823 GN=ZAN PE=1 SV=1	S	Function unknown	PREDICTED: kielin/chordin-like protein isoform X2 [Ovis aries musimon]	biological process: cellular process (GO:0009987);; biological process: developmental process (GO:0032502);; biological process: single-organism process (GO:0044699);; cellular component: extracellular region (GO:0005576);; cellular component: extracellular region part (GO:0044421);; biological process: biological regulation (GO:0065007)
gene-KIAA0040	8.05192	6.72032	5.90282	3.57111	5.32916	3.36472	4.70885	3.63533	6.24848	5.55122	4.99385	0.379887	-0.417861	normal	0.0206653	-0.61427	down	0.60118	-0.229791	normal	--	--	Cellular Component: integral component of membrane (GO:0016021);;	--	--	--	--	--	--	S	Function unknown	hypothetical protein Celaphus_00011141, partial [Cervus elaphus hippelaphus]	cellular component: membrane (GO:0016020);; cellular component: membrane part (GO:0044425)
KIT	2.20941	1.77147	2.07878	0.497922	1.02993	1.49221	0.95118	1.15247	1.01493	1.27735	1.07653	0.00239687	-1.06787	down	0.317768	-0.465885	normal	0.0325707	-0.732553	down	[T]	Signal transduction mechanisms	Biological Process: activation of MAPK activity (GO:0000187);; Biological Process: ovarian follicle development (GO:0001541);; Molecular Function: protease binding (GO:0002020);; Biological Process: myeloid progenitor cell differentiation (GO:0002318);; Biological Process: lymphoid progenitor cell differentiation (GO:0002320);; Biological Process: immature B cell differentiation (GO:0002327);; Bi…	K05091|0|chx:100861386|K05091 proto-oncogene tyrosine-protein kinase Kit [EC:2.7.10.1] | (RefSeq) KIT, SCFR; KIT proto-oncogene receptor tyrosine kinase	Ras signaling pathway (ko04014);; Rap1 signaling pathway (ko04015);; Cytokine-cytokine receptor interaction (ko04060);; Phospholipase D signaling pathway (ko04072);; Endocytosis (ko04144);; PI3K-Akt signaling pathway (ko04151);; Hematopoietic cell lineage (ko04640);; Melanogenesis (ko04916);; Pathways in cancer (ko05200);; Acute myeloid leukemia (ko05221);; Central carbon metabolism in cancer (ko…	[T]	Signal transduction mechanisms	Protein tyrosine kinase;; Protein kinase domain;; Immunoglobulin domain;; Immunoglobulin I-set domain;; Immunoglobulin domain;; Immunoglobulin domain	Mast/stem cell growth factor receptor Kit OS=Capra hircus OX=9925 GN=KIT PE=2 SV=1	T	Signal transduction mechanisms	PREDICTED: mast/stem cell growth factor receptor Kit isoform X1 [Bos indicus]	biological process: biological regulation (GO:0065007);; biological process: reproduction (GO:0000003);; biological process: reproductive process (GO:0022414);; biological process: multicellular organismal process (GO:0032501);; biological process: developmental process (GO:0032502);; biological process: single-organism process (GO:0044699);; biological process: rhythmic process (GO:0048511);; mo…
gene-KLF12	1.98747	1.81022	2.1467	1.57501	1.16105	1.75873	1.96404	1.19279	1.33193	1.18175	1.08471	0.45373	-0.347054	normal	0.856625	-0.120199	normal	0.00968852	-0.613326	down	--	--	Biological Process: negative regulation of transcription from RNA polymerase II promoter (GO:0000122);; Molecular Function: RNA polymerase II regulatory region sequence-specific DNA binding (GO:0000977);; Molecular Function: transcriptional repressor activity, RNA polymerase II transcription regulatory region sequence-specific binding (GO:0001227);; Cellular Component: nucleoplasm (GO:0005654);; …	K09205|0|rno:306110|K09205 krueppel-like factor 8/12 | (RefSeq) Klf12; Kruppel-like factor 12	--	[R]	General function prediction only	Zinc finger, C2H2 type;; Zinc-finger double domain;; C2H2-type zinc finger	Krueppel-like factor 17 OS=Sus scrofa OX=9823 GN=KLF17 PE=2 SV=1	S	Function unknown	PREDICTED: Krueppel-like factor 12 isoform X3 [Rousettus aegyptiacus]	biological process: biological regulation (GO:0065007);; molecular function: binding (GO:0005488);; molecular function: nucleic acid binding transcription factor activity (GO:0001071);; cellular component: cell (GO:0005623);; cellular component: organelle (GO:0043226);; cellular component: organelle part (GO:0044422);; cellular component: cell part (GO:0044464)
gene-KLHL4	2.0396	1.67648	2.15148	1.25699	1.23134	0.841345	1.13921	1.05047	0.997208	0.997928	0.826262	0.305389	-0.43709	normal	0.0158237	-0.689902	down	0.00477262	-0.822889	down	[M]	Cell wall/membrane/envelope biogenesis	Molecular Function: ubiquitin-protein transferase activity (GO:0004842);; Biological Process: protein ubiquitination (GO:0016567);; Cellular Component: Cul3-RING ubiquitin ligase complex (GO:0031463);;	K10442|0|oas:101108287|K10442 kelch-like protein 1/4/5 | (RefSeq) KLHL4; kelch like family member 4	--	[TR]	Signal transduction mechanisms;; General function prediction only	Kelch motif;; Kelch motif;; BTB And C-terminal Kelch;; BTB/POZ domain;; Galactose oxidase, central domain;; Kelch motif;; Galactose oxidase, central domain;; Kelch motif	Kelch-like protein 20 OS=Bos taurus OX=9913 GN=KLHL20 PE=2 SV=3	S	Function unknown	PREDICTED: kelch-like protein 4 isoform X1 [Ovis aries]	molecular function: catalytic activity (GO:0003824);; biological process: metabolic process (GO:0008152);; biological process: cellular process (GO:0009987);; cellular component: cell (GO:0005623);; cellular component: macromolecular complex (GO:0032991);; cellular component: cell part (GO:0044464)
gene-LAMA4	15.4817	15.1428	13.2959	8.71623	9.40425	7.68768	9.88548	6.7027	9.3572	9.81596	9.9965	0.0482404	-0.524341	normal	0.00332837	-0.660198	down	0.0779536	-0.490499	normal	--	--	Biological Process: blood vessel development (GO:0001568);; Molecular Function: receptor binding (GO:0005102);; Cellular Component: basal lamina (GO:0005605);; Biological Process: regulation of cell adhesion (GO:0030155);; Biological Process: regulation of cell migration (GO:0030334);; Biological Process: regulation of embryonic development (GO:0045995);; Biological Process: brown fat cell differ…	K06241|0|chx:102177440|K06241 laminin, alpha 4 | (RefSeq) LAMA4; laminin subunit alpha 4	PI3K-Akt signaling pathway (ko04151);; Focal adhesion (ko04510);; ECM-receptor interaction (ko04512);; African trypanosomiasis (ko05143);; Toxoplasmosis (ko05145);; Amoebiasis (ko05146);; Pathways in cancer (ko05200);; Small cell lung cancer (ko05222)	[W]	Extracellular structures	Laminin G domain;; Laminin G domain;; Laminin Domain I;; Laminin Domain II;; Laminin EGF domain;; Concanavalin A-like lectin/glucanases superfamily	Laminin subunit gamma-2 OS=Equus caballus OX=9796 GN=LAMC2 PE=2 SV=1	S	Function unknown	PREDICTED: laminin subunit alpha-4 isoform X1 [Ovis aries]	biological process: developmental process (GO:0032502);; biological process: single-organism process (GO:0044699);; molecular function: binding (GO:0005488);; cellular component: extracellular region (GO:0005576);; cellular component: extracellular region part (GO:0044421);; biological process: biological regulation (GO:0065007);; biological process: cellular process (GO:0009987)
LAMB1	47.4005	35.5611	39.3287	21.169	21.8067	22.3501	34.028	25.4878	24.4502	29.4334	28.1376	0.000584434	-0.727431	down	0.142251	-0.413691	normal	0.139699	-0.461759	normal	--	--	Molecular Function: extracellular matrix structural constituent (GO:0005201);; Cellular Component: laminin-1 complex (GO:0005606);; Cellular Component: laminin-2 complex (GO:0005607);; Cellular Component: extracellular space (GO:0005615);; Biological Process: neuronal-glial interaction involved in cerebral cortex radial glia guided migration (GO:0021812);; Biological Process: positive regulation …	K05636|0|chx:102176661|K05636 laminin, beta 1 | (RefSeq) LAMB1; laminin subunit beta 1	PI3K-Akt signaling pathway (ko04151);; Focal adhesion (ko04510);; ECM-receptor interaction (ko04512);; Toxoplasmosis (ko05145);; Amoebiasis (ko05146);; Pathways in cancer (ko05200);; Small cell lung cancer (ko05222)	[W]	Extracellular structures	Laminin EGF domain;; Laminin N-terminal (Domain VI)	Netrin-4 OS=Pongo abelii OX=9601 GN=NTN4 PE=2 SV=1	U	Intracellular trafficking, secretion, and vesicular transport	PREDICTED: laminin subunit beta-1 [Ovis aries musimon]	molecular function: structural molecule activity (GO:0005198);; cellular component: extracellular region (GO:0005576);; cellular component: macromolecular complex (GO:0032991);; cellular component: extracellular region part (GO:0044421);; biological process: biological adhesion (GO:0022610);; biological process: single-organism process (GO:0044699);; biological process: biological regulation (GO:…
gene-LBH	6.04846	7.70477	6.36099	4.06344	5.09849	4.00009	3.33221	3.26028	3.32252	4.72276	3.71295	0.454839	-0.364998	normal	0.0451017	-0.648138	down	0.118001	-0.588321	normal	--	--	Cellular Component: nucleus (GO:0005634);; Cellular Component: cytoplasm (GO:0005737);; Biological Process: multicellular organism development (GO:0007275);; Biological Process: regulation of blood coagulation (GO:0030193);; Biological Process: positive regulation of transcription, DNA-templated (GO:0045893);;	--	--	--	--	Cardiac transcription factor regulator, Developmental protein	Protein LBH OS=Bos taurus OX=9913 GN=LBH PE=3 SV=1	K	Transcription	protein LBH [Bos taurus]	cellular component: cell (GO:0005623);; cellular component: organelle (GO:0043226);; cellular component: cell part (GO:0044464);; biological process: multicellular organismal process (GO:0032501);; biological process: developmental process (GO:0032502);; biological process: single-organism process (GO:0044699);; biological process: biological regulation (GO:0065007)
gene-LOC101103714	3.26812	1.98495	1.91366	0.924972	1.9641	0.753337	1.41476	0.870676	1.1689	1.7455	1.28913	0.545193	-0.394542	normal	0.0489565	-0.751618	down	0.269355	-0.513318	normal	--	--	Cellular Component: integral component of membrane (GO:0016021);; Molecular Function: carbohydrate binding (GO:0030246);;	K10072|8.85875e-146|oas:101103227|K10072 C-type lectin domain family 2 member D | (RefSeq) C-type lectin domain family 2 member E-like	--	[TV]	Signal transduction mechanisms;; Defense mechanisms	Lectin C-type domain	NKG2-D type II integral membrane protein OS=Macaca mulatta OX=9544 GN=KLRK1 PE=2 SV=1	S	Function unknown	PREDICTED: C-type lectin domain family 2 member D11-like isoform X1 [Ovis aries]	cellular component: membrane (GO:0016020);; cellular component: membrane part (GO:0044425);; molecular function: binding (GO:0005488)
gene-LOC101107282	1.61045	1.0997	1.02665	1.05484	1.05041	0.627807	0.758669	0.591069	0.735148	1.40415	1.26309	0.912983	-0.100468	normal	0.0384	-0.654222	down	0.950376	-0.0551487	normal	[S]	Function unknown	Biological Process: morphogenesis of an epithelium (GO:0002009);; Biological Process: metanephros morphogenesis (GO:0003338);; Biological Process: cell communication (GO:0007154);; Biological Process: protein transport (GO:0015031);; Cellular Component: integral component of membrane (GO:0016021);; Biological Process: embryonic limb morphogenesis (GO:0030326);; Biological Process: skin developmen…	--	--	--	--	Cadherin-like;; Calx-beta domain;; Furin-like repeat, cysteine-rich;; Giardia variant-specific surface protein;; Growth factor receptor domain IV	Cysteine-rich with EGF-like domain protein 2 OS=Bos taurus OX=9913 GN=CRELD2 PE=2 SV=1	U	Intracellular trafficking, secretion, and vesicular transport	PREDICTED: extracellular matrix protein FRAS1 isoform X2 [Ovis aries]	biological process: developmental process (GO:0032502);; biological process: single-organism process (GO:0044699);; biological process: multicellular organismal process (GO:0032501);; biological process: cellular process (GO:0009987);; biological process: localization (GO:0051179);; cellular component: membrane (GO:0016020);; cellular component: membrane part (GO:0044425);; cellular component: ex…
gene-LOC101108212	0.509335	0.408486	0.484215	0.074087	0.197944	0.085313	0.085729	0.18581	0.174819	0.384152	0.131131	0.117435	-0.757949	normal	0.0195121	-0.948492	down	0.39799	-0.473184	normal	[T]	Signal transduction mechanisms	Molecular Function: adenylate cyclase activity (GO:0004016);; Molecular Function: guanylate cyclase activity (GO:0004383);; Molecular Function: protein kinase activity (GO:0004672);; Molecular Function: ATP binding (GO:0005524);; Molecular Function: GTP binding (GO:0005525);; Cellular Component: endoplasmic reticulum membrane (GO:0005789);; Cellular Component: plasma membrane (GO:0005886);; Biolo…	K12320|0|oas:101108212|K12320 heat-stable enterotoxin receptor [EC:4.6.1.2] | (RefSeq) GUCY2C; guanylate cyclase 2C	Purine metabolism (ko00230)	[T]	Signal transduction mechanisms	Adenylate and Guanylate cyclase catalytic domain;; Protein tyrosine kinase;; Protein kinase domain;; Receptor family ligand binding region	Heat-stable enterotoxin receptor OS=Sus scrofa OX=9823 GN=GUCY2C PE=2 SV=2	T	Signal transduction mechanisms	PREDICTED: heat-stable enterotoxin receptor isoform X2 [Ovis aries]	molecular function: catalytic activity (GO:0003824);; biological process: metabolic process (GO:0008152);; biological process: cellular process (GO:0009987);; molecular function: binding (GO:0005488);; cellular component: cell (GO:0005623);; cellular component: membrane (GO:0016020);; cellular component: organelle (GO:0043226);; cellular component: organelle part (GO:0044422);; cellular component…
gene-LOC101110257	2.78836	3.02803	2.67644	1.30021	1.34932	1.00558	1.55201	1.39936	2.27803	2.63544	2.02772	0.102492	-0.700692	normal	0.0451017	-0.736503	down	0.776342	-0.188951	normal	[H]	Coenzyme transport and metabolism	Molecular Function: serine C-palmitoyltransferase activity (GO:0004758);; Cellular Component: integral component of membrane (GO:0016021);; Cellular Component: serine C-palmitoyltransferase complex (GO:0017059);; Molecular Function: pyridoxal phosphate binding (GO:0030170);; Biological Process: sphingoid biosynthetic process (GO:0046520);;	K00654|0|chx:102184072|K00654 serine palmitoyltransferase [EC:2.3.1.50] | (RefSeq) SPTLC3; serine palmitoyltransferase long chain base subunit 3	Sphingolipid metabolism (ko00600);; Sphingolipid signaling pathway (ko04071)	[O]	Posttranslational modification, protein turnover, chaperones	Aminotransferase class I and II	Serine palmitoyltransferase 1 OS=Macaca fascicularis OX=9541 GN=SPTLC1 PE=2 SV=1	H	Coenzyme transport and metabolism	PREDICTED: serine palmitoyltransferase 3 [Ovis aries musimon]	molecular function: catalytic activity (GO:0003824);; cellular component: membrane (GO:0016020);; cellular component: membrane part (GO:0044425);; cellular component: cell (GO:0005623);; cellular component: macromolecular complex (GO:0032991);; cellular component: organelle (GO:0043226);; cellular component: organelle part (GO:0044422);; cellular component: cell part (GO:0044464);; molecular func…
gene-LOC101110855	21.8058	12.3834	14.8923	13.8666	14.454	3.3907	5.27154	5.10429	7.1774	16.8944	10.9431	0.957688	-0.054738	normal	2.87e-07	-1.33465	down	0.647623	-0.285022	normal	--	--	Molecular Function: signal transducer activity (GO:0004871);; Molecular Function: cytokine activity (GO:0005125);; Biological Process: immune response (GO:0006955);; Cellular Component: integral component of membrane (GO:0016021);;	--	--	--	--	--	--	O	Posttranslational modification, protein turnover, chaperones	PREDICTED: uncharacterized protein LOC101110855 isoform X1 [Ovis aries]	molecular function: signal transducer activity (GO:0004871);; molecular function: binding (GO:0005488);; biological process: immune system process (GO:0002376);; biological process: response to stimulus (GO:0050896);; cellular component: membrane (GO:0016020);; cellular component: membrane part (GO:0044425)
LOC101111337	5.10161	4.02599	4.57091	2.65707	2.52026	2.32641	3.94599	3.04908	2.30748	3.05102	3.01435	0.0111432	-0.626526	down	0.274248	-0.38459	normal	0.0981746	-0.55611	normal	--	--	--	--	--	--	--	Immunoglobulin I-set domain;; Immunoglobulin domain;; Immunoglobulin V-set domain;; Immunoglobulin domain	--	S	Function unknown	PREDICTED: SLAM family member 9-like isoform X3 [Ovis aries musimon]	--
gene-LOC101111669	2.12116	1.44086	1.78199	0.960082	2.2344	0.103931	0.39417	0.122188	0.538384	1.40762	0.333529	0.984221	-0.0279808	normal	9.5e-07	-1.58508	down	0.298059	-0.542014	normal	--	--	Cellular Component: nucleosome (GO:0000786);; Molecular Function: DNA binding (GO:0003677);; Cellular Component: nucleus (GO:0005634);; Molecular Function: protein heterodimerization activity (GO:0046982);;	K11251|6.6499e-65|rro:104663541|K11251 histone H2A | (RefSeq) histone H2A type 1-C	Alcoholism (ko05034);; Systemic lupus erythematosus (ko05322)	[B]	Chromatin structure and dynamics	C-terminus of histone H2A;; Core histone H2A/H2B/H3/H4;; Histone-like transcription factor (CBF/NF-Y) and archaeal histone	Histone H2A type 1 OS=Bos taurus OX=9913 PE=1 SV=2	B	Chromatin structure and dynamics	PREDICTED: histone H2A type 1-E-like [Leptonychotes weddellii]	cellular component: cell (GO:0005623);; cellular component: macromolecular complex (GO:0032991);; cellular component: organelle (GO:0043226);; cellular component: organelle part (GO:0044422);; cellular component: cell part (GO:0044464);; molecular function: binding (GO:0005488)
LOC101112335	29.1781	29.4386	27.5138	13.1169	13.5228	24.7289	13.116	16.6776	14.3218	23.5749	12.5865	7.58e-08	-0.913861	down	0.487953	-0.376478	normal	0.153134	-0.569133	normal	[Q]	Secondary metabolites biosynthesis, transport and catabolism	Molecular Function: copper ion binding (GO:0005507);; Cellular Component: extracellular space (GO:0005615);; Cellular Component: plasma membrane (GO:0005886);; Biological Process: cell adhesion (GO:0007155);; Molecular Function: primary amine oxidase activity (GO:0008131);; Biological Process: amine metabolic process (GO:0009308);; Cellular Component: cell surface (GO:0009986);; Cellular Componen…	K00276|0|chx:102168295|K00276 primary-amine oxidase [EC:1.4.3.21] | (RefSeq) AOC3; membrane primary amine oxidase	Glycine, serine and threonine metabolism (ko00260);; Tyrosine metabolism (ko00350);; Phenylalanine metabolism (ko00360);; beta-Alanine metabolism (ko00410)	[Q]	Secondary metabolites biosynthesis, transport and catabolism	Copper amine oxidase, enzyme domain;; Copper amine oxidase, N3 domain;; Copper amine oxidase, N2 domain	Membrane primary amine oxidase OS=Bos taurus OX=9913 GN=AOC3 PE=2 SV=3	Q	Secondary metabolites biosynthesis, transport and catabolism	PREDICTED: membrane primary amine oxidase isoform X2 [Ovis aries musimon]	molecular function: binding (GO:0005488);; cellular component: extracellular region (GO:0005576);; cellular component: extracellular region part (GO:0044421);; cellular component: cell (GO:0005623);; cellular component: membrane (GO:0016020);; cellular component: cell part (GO:0044464);; biological process: biological adhesion (GO:0022610);; molecular function: catalytic activity (GO:0003824);; b…
LOC101112822	9.47584	19.03	15.2477	3.27792	6.47917	7.68026	15.8991	11.6649	6.39733	11.059	6.07932	0.046494	-0.861848	down	0.84814	-0.163398	normal	0.22971	-0.579235	normal	--	--	Molecular Function: nucleic acid binding (GO:0003676);; Molecular Function: ribonuclease A activity (GO:0004522);; Cellular Component: extracellular region (GO:0005576);; Biological Process: RNA phosphodiester bond hydrolysis, endonucleolytic (GO:0090502);;	K01168|4.92908e-83|oas:101112822|K01168 pancreatic ribonuclease [EC:3.1.27.5] | (RefSeq) BRB, BRN; brain ribonuclease-like	--	--	--	Pancreatic ribonuclease	Brain ribonuclease OS=Ovis aries OX=9940 GN=BRN PE=3 SV=1	A	RNA processing and modification	PREDICTED: brain ribonuclease-like isoform X1 [Ovis aries]	molecular function: binding (GO:0005488);; molecular function: catalytic activity (GO:0003824);; biological process: metabolic process (GO:0008152);; biological process: cellular process (GO:0009987);; cellular component: extracellular region (GO:0005576)
LOC101112891	3.91321	8.05988	5.82809	1.19136	1.20012	3.46547	5.52089	3.79359	7.00443	1.39815	2.16457	6.43e-07	-1.4771	down	0.644336	-0.28462	normal	0.719364	-0.240421	normal	[R]	General function prediction only	Molecular Function: endopeptidase inhibitor activity (GO:0004866);; Cellular Component: extracellular space (GO:0005615);; Biological Process: inflammatory response (GO:0006954);; Biological Process: complement activation (GO:0006956);; Biological Process: negative regulation of endopeptidase activity (GO:0010951);;	K03989|0|chx:102189753|K03989 complement component 4 | (RefSeq) complement C4	Complement and coagulation cascades (ko04610);; Pertussis (ko05133);; Staphylococcus aureus infection (ko05150);; Systemic lupus erythematosus (ko05322)	[O]	Posttranslational modification, protein turnover, chaperones	A-macroglobulin complement component;; A-macroglobulin receptor;; Alpha-2-macroglobulin family;; Alpha-2-macroglobulin family N-terminal region;; MG2 domain;; Alpha-macro-globulin thiol-ester bond-forming region;; Anaphylotoxin-like domain;; UNC-6/NTR/C345C module	Complement C4 (Fragments) OS=Bos taurus OX=9913 GN=C4 PE=1 SV=2	S	Function unknown	PREDICTED: complement C4 isoform X1 [Capra hircus]	molecular function: molecular function regulator (GO:0098772);; biological process: biological regulation (GO:0065007);; cellular component: extracellular region (GO:0005576);; cellular component: extracellular region part (GO:0044421);; biological process: response to stimulus (GO:0050896);; biological process: immune system process (GO:0002376);; biological process: metabolic process (GO:000815…
gene-LOC101112990	3.80026	3.30235	2.99193	2.13328	2.92865	1.17573	3.35713	2.39377	2.25057	1.63353	1.8137	0.682767	-0.246265	normal	0.595409	-0.326835	normal	0.035583	-0.662377	down	--	--	Biological Process: integrin-mediated signaling pathway (GO:0007229);;	--	--	[TW]	Signal transduction mechanisms;; Extracellular structures	EGF-like domain	Integrin beta-6 OS=Sus scrofa OX=9823 GN=ITGB6 PE=2 SV=1	U	Intracellular trafficking, secretion, and vesicular transport	PREDICTED: integrin beta-like protein 1 isoform X2 [Ovis aries musimon]	biological process: cellular process (GO:0009987);; biological process: signaling (GO:0023052);; biological process: single-organism process (GO:0044699);; biological process: response to stimulus (GO:0050896);; biological process: biological regulation (GO:0065007)
gene-LOC101113252	7.09489	8.61725	7.54614	5.94354	3.46476	3.92245	9.69983	13.3077	2.0737	3.07205	4.60213	0.36885	-0.455089	normal	0.775032	0.223549	normal	0.0183427	-0.859387	down	[D]	Cell cycle control, cell division, chromosome partitioning	Molecular Function: microfilament motor activity (GO:0000146);; Biological Process: skeletal muscle contraction (GO:0003009);; Molecular Function: ATP binding (GO:0005524);; Cellular Component: myosin complex (GO:0016459);; Molecular Function: ATPase activity, coupled (GO:0042623);; Cellular Component: contractile fiber (GO:0043292);; Biological Process: ATP metabolic process (GO:0046034);; Molec…	K10352|0|bom:102283722|K10352 myosin heavy chain | (RefSeq) MYH3; myosin-3	Tight junction (ko04530)	[Z]	Cytoskeleton	Myosin head (motor domain);; Myosin tail;; Myosin N-terminal SH3-like domain	Myosin-2 OS=Canis lupus familiaris OX=9615 GN=MYH2 PE=3 SV=1	Z	Cytoskeleton	PREDICTED: myosin-3 isoform X2 [Ovis aries musimon]	molecular function: catalytic activity (GO:0003824);; biological process: multicellular organismal process (GO:0032501);; molecular function: binding (GO:0005488);; cellular component: cell (GO:0005623);; cellular component: macromolecular complex (GO:0032991);; cellular component: organelle (GO:0043226);; cellular component: organelle part (GO:0044422);; cellular component: cell part (GO:0044464…
gene-LOC101114712	8.39075	13.8844	11.0103	10.5207	17.3173	2.99022	4.50784	6.31691	22.1055	14.7715	15.9314	0.678927	0.29262	normal	0.0295218	-0.814346	down	0.223402	0.514587	normal	[R]	General function prediction only	Molecular Function: methyltransferase activity (GO:0008168);; Biological Process: methylation (GO:0032259);;	--	--	[A]	RNA processing and modification	Lysine methyltransferase;; Ribosomal protein L11 methyltransferase (PrmA)	Protein-lysine methyltransferase METTL21E OS=Bos taurus OX=9913 GN=METTL21E PE=2 SV=1	S	Function unknown	PREDICTED: protein-lysine methyltransferase METTL21E isoform X1 [Ovis aries]	molecular function: catalytic activity (GO:0003824);; biological process: metabolic process (GO:0008152)
LOC101115315	1.57105	1.5692	1.47205	0.66286	0.719554	1.01007	0.786826	1.45184	0.703215	0.996067	0.685357	0.00888442	-0.827392	down	0.717164	-0.253989	normal	0.0718842	-0.688024	normal	--	--	Molecular Function: transcription coactivator activity (GO:0003713);; Cellular Component: nucleoplasm (GO:0005654);; Biological Process: positive regulation of transcription of Notch receptor target (GO:0007221);;	K06061|0|oas:101115315|K06061 mastermind | (RefSeq) MAML3; mastermind like transcriptional coactivator 3	Notch signaling pathway (ko04330)	--	--	--	--	S	Function unknown	PREDICTED: LOW QUALITY PROTEIN: mastermind-like protein 3 [Ovis aries]	molecular function: transcription factor activity, protein binding (GO:0000988);; biological process: biological regulation (GO:0065007);; cellular component: cell (GO:0005623);; cellular component: organelle (GO:0043226);; cellular component: organelle part (GO:0044422);; cellular component: cell part (GO:0044464)
gene-LOC101115905	15.8325	15.5379	12.5439	7.36161	13.5504	7.65392	7.97906	8.05898	10.4768	14.5952	10.5915	0.6675	-0.285453	normal	0.0107556	-0.661184	down	0.693519	-0.2127	normal	--	--	Molecular Function: filamin binding (GO:0031005);; Cellular Component: actin filament bundle (GO:0032432);; Biological Process: skeletal system morphogenesis (GO:0048705);; Biological Process: negative regulation of chondrocyte development (GO:0061182);; Biological Process: actin filament bundle organization (GO:0061572);; Biological Process: negative regulation of bone mineralization involved in…	--	--	--	--	FAM101 family	--	S	Function unknown	PREDICTED: filamin-interacting protein FAM101A isoform X2 [Ovis aries musimon]	molecular function: binding (GO:0005488);; cellular component: cell (GO:0005623);; cellular component: organelle (GO:0043226);; cellular component: organelle part (GO:0044422);; cellular component: cell part (GO:0044464);; biological process: multicellular organismal process (GO:0032501);; biological process: developmental process (GO:0032502);; biological process: single-organism process (GO:004…
gene-LOC101118851	5.26015	4.0691	3.46025	3.11403	2.75512	1.9708	1.80076	1.84981	3.04522	3.20339	2.77879	0.524053	-0.338845	normal	0.00217579	-0.859056	down	0.355013	-0.377493	normal	[M]	Cell wall/membrane/envelope biogenesis	Molecular Function: ubiquitin-protein transferase activity (GO:0004842);; Biological Process: protein ubiquitination (GO:0016567);; Cellular Component: Cul3-RING ubiquitin ligase complex (GO:0031463);;	K10460|0|chx:102169914|K10460 kelch-like protein 23 | (RefSeq) KLHL23; kelch like family member 23	--	[TR]	Signal transduction mechanisms;; General function prediction only	Kelch motif;; Kelch motif;; BTB/POZ domain;; BTB And C-terminal Kelch;; Galactose oxidase, central domain;; Kelch motif;; Galactose oxidase, central domain;; Kelch motif;; Domain of unknown function (DUF3342)	Kelch-like protein 23 OS=Pongo abelii OX=9601 GN=KLHL23 PE=2 SV=1	S	Function unknown	PREDICTED: kelch-like protein 23 isoform X3 [Ovis aries musimon]	molecular function: catalytic activity (GO:0003824);; biological process: metabolic process (GO:0008152);; biological process: cellular process (GO:0009987);; cellular component: cell (GO:0005623);; cellular component: macromolecular complex (GO:0032991);; cellular component: cell part (GO:0044464)
gene-LOC101119572	2.37255	1.34392	1.07943	0.228342	0.314883	0	0.080347	0	0.044015	0.407574	0.134152	0.0650636	-0.816764	normal	6.53e-05	-1.30173	down	0.0541841	-0.779612	normal	--	--	Biological Process: monocyte chemotaxis (GO:0002548);; Molecular Function: protein kinase activity (GO:0004672);; Cellular Component: extracellular space (GO:0005615);; Cellular Component: cell (GO:0005623);; Biological Process: calcium ion transport (GO:0006816);; Biological Process: cellular calcium ion homeostasis (GO:0006874);; Biological Process: exocytosis (GO:0006887);; Biological Process:…	K16596|6.76183e-63|oas:101119572|K16596 C-C motif chemokine 8 | (RefSeq) CCL8; C-C motif chemokine 8	Cytokine-cytokine receptor interaction (ko04060);; Chemokine signaling pathway (ko04062)	--	--	Small cytokines (intecrine/chemokine), interleukin-8 like	C-C motif chemokine 8 OS=Bos taurus OX=9913 GN=CCL8 PE=3 SV=1	O	Posttranslational modification, protein turnover, chaperones	CCL8 [Cervus elaphus hippelaphus]	biological process: immune system process (GO:0002376);; biological process: cellular process (GO:0009987);; biological process: locomotion (GO:0040011);; biological process: single-organism process (GO:0044699);; biological process: response to stimulus (GO:0050896);; biological process: localization (GO:0051179);; molecular function: catalytic activity (GO:0003824);; biological process: metabol…
gene-LOC101120574	11.6172	7.17124	7.82517	6.2212	6.32122	2.79643	6.57986	3.41445	5.54513	5.33926	6.41755	0.572272	-0.307949	normal	0.0471619	-0.72962	down	0.22971	-0.469151	normal	--	--	Molecular Function: metalloendopeptidase activity (GO:0004222);; Cellular Component: proteinaceous extracellular matrix (GO:0005578);; Biological Process: integrin-mediated signaling pathway (GO:0007229);; Biological Process: spermatogenesis (GO:0007283);; Molecular Function: zinc ion binding (GO:0008270);; Biological Process: protein processing (GO:0016485);; Biological Process: collagen fibril …	K08618|0|oas:101120574|K08618 a disintegrin and metalloproteinase with thrombospondin motifs 2 [EC:3.4.24.14] | (RefSeq) ADAMTS2; ADAM metallopeptidase with thrombospondin type 1 motif 2	--	[O]	Posttranslational modification, protein turnover, chaperones	ADAM-TS Spacer 1;; Thrombospondin type 1 domain	A disintegrin and metalloproteinase with thrombospondin motifs 2 OS=Bos taurus OX=9913 GN=ADAMTS2 PE=1 SV=1	O	Posttranslational modification, protein turnover, chaperones	PREDICTED: LOW QUALITY PROTEIN: A disintegrin and metalloproteinase with thrombospondin motifs 2 isoform X1 [Ovis aries]	molecular function: catalytic activity (GO:0003824);; biological process: metabolic process (GO:0008152);; cellular component: extracellular region (GO:0005576);; cellular component: extracellular region part (GO:0044421);; biological process: cellular process (GO:0009987);; biological process: signaling (GO:0023052);; biological process: single-organism process (GO:0044699);; biological process:…
LOC101121522	2.63604	2.38353	2.4606	1.37469	1.51345	1.74061	1.79543	1.39264	1.8548	1.7591	1.44817	0.0152978	-0.604625	down	0.20634	-0.413046	normal	0.126337	-0.465098	normal	--	--	Molecular Function: calcium ion binding (GO:0005509);; Cellular Component: nucleoplasm (GO:0005654);; Cellular Component: cytoplasm (GO:0005737);; Cellular Component: plasma membrane (GO:0005886);; Biological Process: negative regulation of epithelial cell migration (GO:0010633);; Biological Process: establishment of protein localization (GO:0045184);; Biological Process: negative regulation of e…	--	--	--	--	PDZ domain of MCC-2 bdg protein for Usher syndrome	--	S	Function unknown	PREDICTED: colorectal mutant cancer protein isoform X3 [Ovis aries musimon]	molecular function: binding (GO:0005488);; cellular component: cell (GO:0005623);; cellular component: organelle (GO:0043226);; cellular component: organelle part (GO:0044422);; cellular component: cell part (GO:0044464);; cellular component: membrane (GO:0016020);; biological process: biological regulation (GO:0065007);; biological process: localization (GO:0051179)
LOC101123419	0.336793	0.439488	0.632647	0.125178	0.079096	0.424536	0.407473	0.316289	0.463273	0.126759	0.152157	0.015001	-0.987041	down	0.924883	-0.098714	normal	0.48505	-0.412515	normal	[R]	General function prediction only	Molecular Function: endopeptidase inhibitor activity (GO:0004866);; Cellular Component: extracellular space (GO:0005615);; Biological Process: inflammatory response (GO:0006954);; Biological Process: complement activation (GO:0006956);; Biological Process: negative regulation of endopeptidase activity (GO:0010951);;	--	--	[O]	Posttranslational modification, protein turnover, chaperones	A-macroglobulin complement component;; Alpha-2-macroglobulin family;; A-macroglobulin receptor;; Alpha-2-macroglobulin family N-terminal region;; Alpha-macro-globulin thiol-ester bond-forming region;; Anaphylotoxin-like domain;; MG2 domain	Complement C4 (Fragments) OS=Bos taurus OX=9913 GN=C4 PE=1 SV=2	S	Function unknown	PREDICTED: LOW QUALITY PROTEIN: complement C4-A-like [Capra hircus]	molecular function: molecular function regulator (GO:0098772);; biological process: biological regulation (GO:0065007);; cellular component: extracellular region (GO:0005576);; cellular component: extracellular region part (GO:0044421);; biological process: response to stimulus (GO:0050896);; biological process: immune system process (GO:0002376);; biological process: metabolic process (GO:000815…
LOC101123672	2.60751	6.6609	3.32716	1.39622	0.808139	3.60084	4.25202	3.67542	5.41804	1.23197	1.46261	0.0191557	-0.95771	down	0.990612	-0.0111539	normal	0.787069	-0.189315	normal	[R]	General function prediction only	Molecular Function: endopeptidase inhibitor activity (GO:0004866);; Cellular Component: extracellular space (GO:0005615);; Biological Process: inflammatory response (GO:0006954);; Biological Process: complement activation (GO:0006956);; Biological Process: negative regulation of endopeptidase activity (GO:0010951);;	--	--	[O]	Posttranslational modification, protein turnover, chaperones	A-macroglobulin complement component;; A-macroglobulin receptor;; Alpha-2-macroglobulin family;; Alpha-2-macroglobulin family N-terminal region;; MG2 domain;; Alpha-macro-globulin thiol-ester bond-forming region;; Anaphylotoxin-like domain;; UNC-6/NTR/C345C module	Complement C4 (Fragments) OS=Bos taurus OX=9913 GN=C4 PE=1 SV=2	S	Function unknown	PREDICTED: complement C4 isoform X1 [Capra hircus]	molecular function: molecular function regulator (GO:0098772);; biological process: biological regulation (GO:0065007);; cellular component: extracellular region (GO:0005576);; cellular component: extracellular region part (GO:0044421);; biological process: response to stimulus (GO:0050896);; biological process: immune system process (GO:0002376);; biological process: metabolic process (GO:000815…
gene-LOC105601845	126.584	62.8687	96.5692	48.1596	52.6047	44.0824	52.4944	48.208	106.514	118.251	45.1509	0.153708	-0.60847	normal	0.0289644	-0.690486	down	0.977737	-0.028251	normal	[J]	Translation, ribosomal structure and biogenesis	Biological Process: ribosomal large subunit assembly (GO:0000027);; Molecular Function: structural constituent of ribosome (GO:0003735);; Cellular Component: nucleus (GO:0005634);; Cellular Component: polysome (GO:0005844);; Biological Process: translation (GO:0006412);; Biological Process: spermatogenesis (GO:0007283);; Cellular Component: membrane (GO:0016020);; Cellular Component: cytosolic la…	K02866|1.82626e-158|phd:102327737|K02866 large subunit ribosomal protein L10e | (RefSeq) RPL10; ribosomal protein L10	Ribosome (ko03010)	[J]	Translation, ribosomal structure and biogenesis	Ribosomal protein L16p/L10e	60S ribosomal protein L10 OS=Ovis aries OX=9940 GN=RPL10 PE=2 SV=1	J	Translation, ribosomal structure and biogenesis	PREDICTED: 60S ribosomal protein L10 isoform X1 [Pantholops hodgsonii]	biological process: cellular process (GO:0009987);; biological process: cellular component organization or biogenesis (GO:0071840);; molecular function: structural molecule activity (GO:0005198);; cellular component: cell (GO:0005623);; cellular component: organelle (GO:0043226);; cellular component: cell part (GO:0044464);; cellular component: macromolecular complex (GO:0032991);; biological pro…
gene-LOC106990096	3.20112	4.23946	3.05522	1.48646	2.22533	1.19554	2.00454	1.87437	2.46245	3.33873	1.837	0.183476	-0.600943	normal	0.0230067	-0.746956	down	0.56059	-0.31769	normal	--	--	Cellular Component: extracellular region (GO:0005576);; Biological Process: complement activation, alternative pathway (GO:0006957);;	K04004|0|bta:280816|K04004 complement factor H | (RefSeq) CFH, HF1; complement factor H	Complement and coagulation cascades (ko04610);; Staphylococcus aureus infection (ko05150)	--	--	Sushi repeat (SCR repeat)	Complement factor H OS=Bos taurus OX=9913 GN=CFH PE=1 SV=3	S	Function unknown	PREDICTED: complement factor H isoform X1 [Capra hircus]	cellular component: extracellular region (GO:0005576);; biological process: immune system process (GO:0002376);; biological process: metabolic process (GO:0008152);; biological process: response to stimulus (GO:0050896);; biological process: biological regulation (GO:0065007)
gene-LOC114108712	2.52438	2.12048	2.50039	1.22487	2.40262	0.196151	0.46561	0.747751	1.92749	1.22996	0.300918	0.852509	-0.183359	normal	0.0316761	-0.884892	down	0.320606	-0.522986	normal	--	--	Molecular Function: 2'-5'-oligoadenylate synthetase activity (GO:0001730);; Molecular Function: double-stranded RNA binding (GO:0003725);; Molecular Function: ATP binding (GO:0005524);; Cellular Component: nucleus (GO:0005634);; Cellular Component: cytoplasm (GO:0005737);; Biological Process: glucose metabolic process (GO:0006006);; Biological Process: purine nucleotide biosynthetic process (GO:0…	--	--	--	--	2'-5'-oligoadenylate synthetase 1, domain 2, C-terminus;; Nucleotidyltransferase domain	2&apos;-5&apos;-oligoadenylate synthase 1 OS=Sus scrofa OX=9823 GN=OAS1 PE=1 SV=3	O	Posttranslational modification, protein turnover, chaperones	PREDICTED: 2&apos;-5&apos;-oligoadenylate synthase 1 isoform X4 [Capra hircus]	molecular function: catalytic activity (GO:0003824);; molecular function: binding (GO:0005488);; cellular component: cell (GO:0005623);; cellular component: organelle (GO:0043226);; cellular component: cell part (GO:0044464);; biological process: metabolic process (GO:0008152);; biological process: single-organism process (GO:0044699);; biological process: cellular process (GO:0009987);; biologic…
LOC114108725	9.99772	11.7001	6.43933	1.2161	1.8008	12.715	2.06464	7.81173	6.13886	6.87724	5.32252	1.26e-08	-1.64468	down	0.974807	-0.0341174	normal	0.342035	-0.441472	normal	--	--	Molecular Function: antigen binding (GO:0003823);; Cellular Component: plasma membrane (GO:0005886);; Cellular Component: integral component of membrane (GO:0016021);; Biological Process: antigen processing and presentation (GO:0019882);; Biological Process: natural killer cell mediated cytotoxicity (GO:0042267);; Molecular Function: natural killer cell lectin-like receptor binding (GO:0046703);;	K07986|2.76358e-108|bta:100126815|K07986 UL16 binding protein | (RefSeq) MHC class I-like family A1	Natural killer cell mediated cytotoxicity (ko04650)	--	--	Class I Histocompatibility antigen, domains alpha 1 and 2	Zinc-alpha-2-glycoprotein OS=Bos taurus OX=9913 GN=AZGP1 PE=2 SV=1	S	Function unknown	PREDICTED: NKG2D ligand 1-like isoform X1 [Capra hircus]	molecular function: binding (GO:0005488);; cellular component: cell (GO:0005623);; cellular component: membrane (GO:0016020);; cellular component: cell part (GO:0044464);; cellular component: membrane part (GO:0044425);; biological process: immune system process (GO:0002376);; biological process: cell killing (GO:0001906);; biological process: single-organism process (GO:0044699);; biological pro…
LOC114108784	2.24159	1.05219	1.76604	0.036311	0.044403	0.823939	0	0.203068	0.085058	0.689097	0.554756	1.7e-19	-2.48689	down	0.740483	-0.145213	normal	0.108895	-0.735023	normal	--	--	Molecular Function: ubiquitin-protein transferase activity (GO:0004842);; Cellular Component: nucleoplasm (GO:0005654);; Cellular Component: cytoplasm (GO:0005737);; Biological Process: double-strand break repair (GO:0006302);; Molecular Function: zinc ion binding (GO:0008270);; Biological Process: histone monoubiquitination (GO:0010390);; Molecular Function: ligase activity (GO:0016874);; Molecu…	K06058|0|phd:102324652|K06058 deltex [EC:2.3.2.27] | (RefSeq) DTX3L; deltex E3 ubiquitin ligase 3L	Notch signaling pathway (ko04330)	--	--	Ring finger domain;; Zinc finger, C3HC4 type (RING finger);; Zinc finger, C3HC4 type (RING finger);; Zinc finger, C3HC4 type (RING finger)	Probable E3 ubiquitin-protein ligase DTX3 OS=Pongo abelii OX=9601 GN=DTX3 PE=2 SV=1	O	Posttranslational modification, protein turnover, chaperones	PREDICTED: E3 ubiquitin-protein ligase DTX3L isoform X2 [Ovis aries musimon]	molecular function: catalytic activity (GO:0003824);; cellular component: cell (GO:0005623);; cellular component: organelle (GO:0043226);; cellular component: organelle part (GO:0044422);; cellular component: cell part (GO:0044464);; biological process: metabolic process (GO:0008152);; biological process: cellular process (GO:0009987);; biological process: response to stimulus (GO:0050896);; mole…
gene-LOC114112267	7.98414	6.33406	0.647783	0.358095	0.293025	0.163466	0.254243	0.336909	11.358	6.26359	12.8682	0.356261	-0.395999	normal	0.000129524	-1.28307	down	0.715825	0.211744	normal	--	--	Cellular Component: lysosomal membrane (GO:0005765);; Cellular Component: plasma membrane (GO:0005886);; Biological Process: heterophilic cell-cell adhesion via plasma membrane cell adhesion molecules (GO:0007157);; Biological Process: muscle organ development (GO:0007517);; Cellular Component: endosome membrane (GO:0010008);; Cellular Component: integral component of membrane (GO:0016021);;	K06546|1.22522e-55|phd:102319814|K06546 CD164 antigen | (RefSeq) CD164; CD164 molecule	Lysosome (ko04142)	--	--	Multi-glycosylated core protein 24 (MGC-24), sialomucin	Sialomucin core protein 24 OS=Bos taurus OX=9913 GN=CD164 PE=2 SV=1	U	Intracellular trafficking, secretion, and vesicular transport	PREDICTED: sialomucin core protein 24 [Pantholops hodgsonii]	cellular component: cell (GO:0005623);; cellular component: membrane (GO:0016020);; cellular component: organelle (GO:0043226);; cellular component: organelle part (GO:0044422);; cellular component: cell part (GO:0044464);; biological process: biological adhesion (GO:0022610);; biological process: multicellular organismal process (GO:0032501);; biological process: developmental process (GO:003250…
gene-LOC114114600	44.9282	66.0211	57.2271	74.806	9.64141	2.73228	16.8448	7.6649	4.72893	4.31604	3.19342	0.957152	-0.0575555	normal	1.28e-05	-1.44417	down	2.74e-46	-2.92865	down	--	--	Molecular Function: actin monomer binding (GO:0003785);; Cellular Component: nucleus (GO:0005634);; Cellular Component: cytosol (GO:0005829);; Cellular Component: cytoskeleton (GO:0005856);; Biological Process: actin filament organization (GO:0007015);; Biological Process: regulation of cell migration (GO:0030334);;	K05764|1.69999e-35|oas:101106384|K05764 thymosin, beta 4 | (RefSeq) thymosin beta-4	Regulation of actin cytoskeleton (ko04810)	[N]	Cell motility	Thymosin beta-4 family	Thymosin beta-4 OS=Pongo abelii OX=9601 GN=TMSB4X PE=3 SV=3	O	Posttranslational modification, protein turnover, chaperones	PREDICTED: thymosin beta-4 isoform X1 [Ovis aries]	molecular function: binding (GO:0005488);; cellular component: cell (GO:0005623);; cellular component: organelle (GO:0043226);; cellular component: cell part (GO:0044464);; biological process: cellular process (GO:0009987);; biological process: single-organism process (GO:0044699);; biological process: cellular component organization or biogenesis (GO:0071840);; biological process: biological reg…
LOC114115881	9.20597	10.982	11.2455	0	0	0	0	0	0	0	0	2.25e-22	-2.6755	down	3.69e-30	-3.15645	down	4.53e-32	-2.99044	down	--	--	Biological Process: multicellular organism development (GO:0007275);; Molecular Function: zinc ion binding (GO:0008270);; Biological Process: positive regulation of transcription, DNA-templated (GO:0045893);;	--	--	--	--	Churchill protein	Protein Churchill OS=Bos taurus OX=9913 GN=CHURC1 PE=2 SV=2	K	Transcription	PREDICTED: protein Churchill isoform X3 [Capra hircus]	biological process: multicellular organismal process (GO:0032501);; biological process: developmental process (GO:0032502);; biological process: single-organism process (GO:0044699);; molecular function: binding (GO:0005488);; biological process: biological regulation (GO:0065007)
gene-LOC114117002	4.39562	3.75909	5.06925	3.94167	3.48713	4.44424	5.56993	4.64957	0	0	0	0.898402	-0.105137	normal	0.538374	0.255383	normal	8.83e-75	-4.27812	down	--	--	Cellular Component: nucleoplasm (GO:0005654);; Cellular Component: cytoplasm (GO:0005737);; Molecular Function: hydrogen ion transmembrane transporter activity (GO:0015078);; Biological Process: ATP synthesis coupled proton transport (GO:0015986);; Biological Process: ATP hydrolysis coupled proton transport (GO:0015991);; Cellular Component: integral component of membrane (GO:0016021);; Molecular…	K10585|2.01148e-73|umr:103660599|K10585 ubiquitin-conjugating enzyme E2 Z [EC:2.3.2.23] | (RefSeq) UBE2Z; ubiquitin conjugating enzyme E2 Z	Ubiquitin mediated proteolysis (ko04120)	[O]	Posttranslational modification, protein turnover, chaperones	--	--	O	Posttranslational modification, protein turnover, chaperones	hypothetical protein Celaphus_00001170 [Cervus elaphus hippelaphus]	cellular component: cell (GO:0005623);; cellular component: organelle (GO:0043226);; cellular component: organelle part (GO:0044422);; cellular component: cell part (GO:0044464);; molecular function: transporter activity (GO:0005215);; biological process: localization (GO:0051179);; biological process: metabolic process (GO:0008152);; biological process: cellular process (GO:0009987);; biological…
gene-LRRC8D	1.68421	1.35879	0.951355	1.12599	1.49669	0.266891	0.635688	0.256079	1.08405	1.13425	0.531289	0.98896	0.0161196	normal	0.0473501	-0.784971	down	0.27191	-0.448958	normal	[K]	Transcription	Cellular Component: integral component of membrane (GO:0016021);;	--	--	[R]	General function prediction only	Pannexin-like TM region of LRRC8;; Leucine rich repeat;; Leucine Rich repeats (2 copies);; Leucine-rich repeat;; Leucine rich repeats (6 copies);; Leucine Rich Repeat	Volume-regulated anion channel subunit LRRC8C OS=Bos taurus OX=9913 GN=LRRC8C PE=2 SV=1	S	Function unknown	PREDICTED: volume-regulated anion channel subunit LRRC8D [Ovis aries musimon]	cellular component: membrane (GO:0016020);; cellular component: membrane part (GO:0044425)
gene-LTBP1	10.0716	6.50708	8.03492	5.56206	5.44677	3.81997	5.88978	3.65127	5.91273	5.17733	6.6877	0.345799	-0.393999	normal	0.0352669	-0.616965	down	0.411064	-0.340509	normal	--	--	Cellular Component: microfibril (GO:0001527);; Biological Process: ventricular septum development (GO:0003281);; Molecular Function: calcium ion binding (GO:0005509);; Cellular Component: proteinaceous extracellular matrix (GO:0005578);; Biological Process: aorta development (GO:0035904);; Cellular Component: protein complex (GO:0043234);; Molecular Function: transforming growth factor beta bindi…	K19559|0|oas:101102219|K19559 latent transforming growth factor beta binding protein 1 | (RefSeq) LTBP1; latent transforming growth factor beta binding protein 1	TGF-beta signaling pathway (ko04350)	[T]	Signal transduction mechanisms	Calcium-binding EGF domain;; Complement Clr-like EGF-like;; TB domain;; EGF-like domain;; Human growth factor-like EGF;; EGF domain	Latent-transforming growth factor beta-binding protein 2 OS=Bos taurus OX=9913 GN=LTBP2 PE=1 SV=2	A	RNA processing and modification	PREDICTED: latent-transforming growth factor beta-binding protein 1 isoform X1 [Ovis aries musimon]	cellular component: extracellular region (GO:0005576);; cellular component: extracellular region part (GO:0044421);; cellular component: supramolecular complex (GO:0099080);; biological process: multicellular organismal process (GO:0032501);; biological process: developmental process (GO:0032502);; biological process: single-organism process (GO:0044699);; molecular function: binding (GO:0005488)…
gene-LUM	39.1884	42.5615	38.2249	31.3283	32.2642	20.7875	24.6039	21.1451	34.846	32.674	22.5371	0.650485	-0.198192	normal	0.000359543	-0.664829	down	0.404751	-0.327974	normal	[K]	Transcription	Molecular Function: collagen binding (GO:0005518);; Cellular Component: fibrillar collagen trimer (GO:0005583);; Cellular Component: extracellular space (GO:0005615);; Biological Process: axonogenesis (GO:0007409);; Biological Process: visual perception (GO:0007601);; Biological Process: collagen fibril organization (GO:0030199);; Biological Process: positive regulation of transforming growth fac…	K08122|0|oas:101112967|K08122 lumican | (RefSeq) LUM; lumican	Proteoglycans in cancer (ko05205)	[R]	General function prediction only	Leucine rich repeat;; Leucine Rich repeats (2 copies);; Leucine Rich repeat;; Leucine Rich Repeat;; Leucine-rich repeat;; Leucine rich repeat N-terminal domain	Lumican OS=Bos taurus OX=9913 GN=LUM PE=1 SV=1	S	Function unknown	PREDICTED: lumican [Ovis aries]	molecular function: binding (GO:0005488);; cellular component: extracellular region (GO:0005576);; cellular component: macromolecular complex (GO:0032991);; cellular component: extracellular region part (GO:0044421);; biological process: cellular process (GO:0009987);; biological process: multicellular organismal process (GO:0032501);; biological process: developmental process (GO:0032502);; biol…
MAGI1	2.94226	2.37277	2.3273	1.33527	1.51915	1.99036	1.66352	1.75729	1.70486	2.0135	1.3338	0.0378812	-0.619009	down	0.519554	-0.300894	normal	0.223772	-0.465707	normal	[F]	Nucleotide transport and metabolism	Cellular Component: nucleoplasm (GO:0005654);; Cellular Component: cytoplasm (GO:0005737);; Cellular Component: adherens junction (GO:0005912);; Cellular Component: bicellular tight junction (GO:0005923);; Molecular Function: protein complex scaffold activity (GO:0032947);; Cellular Component: cell projection (GO:0042995);; Molecular Function: alpha-actinin binding (GO:0051393);; Biological Proce…	K05631|0|mcc:698092|K05631 atrophin-1 interacting protein 3 (BAI1-associated protein 1) | (RefSeq) MAGI1; membrane associated guanylate kinase, WW and PDZ domain containing 1	Rap1 signaling pathway (ko04015);; Tight junction (ko04530)	[R]	General function prediction only	PDZ domain (Also known as DHR or GLGF);; Unstructured region on MAGI;; Unstructured region on MAGI;; PDZ domain;; WW domain;; Guanylate kinase;; Tricorn protease PDZ domain	Na(+)/H(+) exchange regulatory cofactor NHE-RF3 OS=Bos taurus OX=9913 GN=PDZK1 PE=2 SV=1	O	Posttranslational modification, protein turnover, chaperones	PREDICTED: membrane-associated guanylate kinase, WW and PDZ domain-containing protein 1 isoform X11 [Ovis aries musimon]	cellular component: cell (GO:0005623);; cellular component: organelle (GO:0043226);; cellular component: organelle part (GO:0044422);; cellular component: cell part (GO:0044464);; cellular component: cell junction (GO:0030054);; molecular function: structural molecule activity (GO:0005198);; molecular function: binding (GO:0005488);; biological process: cellular process (GO:0009987);; biological …
MAP1B	3.06659	2.73522	2.42699	1.48988	1.3794	1.38662	2.14253	1.49568	1.65119	1.70241	1.64164	0.00274425	-0.81634	down	0.00656369	-0.655922	down	0.065362	-0.550986	normal	--	--	Biological Process: microtubule bundle formation (GO:0001578);; Cellular Component: photoreceptor outer segment (GO:0001750);; Cellular Component: cytosol (GO:0005829);; Cellular Component: microtubule (GO:0005874);; Cellular Component: plasma membrane (GO:0005886);; Molecular Function: microtubule binding (GO:0008017);; Cellular Component: postsynaptic density of dendrite (GO:0014069);; Biologic…	K10429|0|oas:101116509|K10429 microtubule-associated protein 1 | (RefSeq) MAP1B; microtubule associated protein 1B	--	[Z]	Cytoskeleton	Neuraxin and MAP1B repeat	Microtubule-associated protein 1S OS=Bos taurus OX=9913 GN=MAP1S PE=2 SV=1	S	Function unknown	PREDICTED: microtubule-associated protein 1B isoform X2 [Ovis aries musimon]	biological process: cellular process (GO:0009987);; biological process: cellular component organization or biogenesis (GO:0071840);; cellular component: cell (GO:0005623);; cellular component: organelle (GO:0043226);; cellular component: organelle part (GO:0044422);; cellular component: cell part (GO:0044464);; cellular component: supramolecular complex (GO:0099080);; cellular component: membrane…
gene-MARCKS	18.7177	19.2874	17.0067	11.8835	11.7041	8.8522	12.2168	10.8458	11.6902	13.0175	11.804	0.0979669	-0.47322	normal	0.00418377	-0.605032	down	0.0779536	-0.492099	normal	--	--	Molecular Function: actin binding (GO:0003779);; Molecular Function: protein kinase C binding (GO:0005080);; Molecular Function: calmodulin binding (GO:0005516);; Cellular Component: centrosome (GO:0005813);; Cellular Component: plasma membrane (GO:0005886);; Cellular Component: focal adhesion (GO:0005925);; Cellular Component: cell cortex (GO:0005938);; Cellular Component: germinal vesicle (GO:0…	K12561|1.76344e-28|bom:102280729|K12561 myristoylated alanine-rich C-kinase substrate | (RefSeq) MARCKS; myristoylated alanine rich protein kinase C substrate	Fc gamma R-mediated phagocytosis (ko04666);; MicroRNAs in cancer (ko05206)	--	--	MARCKS family	Myristoylated alanine-rich C-kinase substrate OS=Bos taurus OX=9913 GN=MARCKS PE=1 SV=6	O	Posttranslational modification, protein turnover, chaperones	PREDICTED: fibrous sheath CABYR-binding protein-like [Manis javanica]	molecular function: binding (GO:0005488);; cellular component: cell (GO:0005623);; cellular component: organelle (GO:0043226);; cellular component: organelle part (GO:0044422);; cellular component: cell part (GO:0044464);; cellular component: membrane (GO:0016020);; cellular component: cell junction (GO:0030054);; cellular component: extracellular region (GO:0005576);; cellular component: extrace…
gene-MARCKSL1	9.44407	5.57725	6.94104	3.56384	4.16169	1.76002	4.73813	2.47927	5.19053	4.47188	3.56679	0.154491	-0.611055	normal	0.0250804	-0.841225	down	0.183541	-0.540889	normal	--	--	Molecular Function: actin binding (GO:0003779);; Molecular Function: calmodulin binding (GO:0005516);; Cellular Component: cytoplasm (GO:0005737);; Cellular Component: plasma membrane (GO:0005886);; Biological Process: positive regulation of cell proliferation (GO:0008284);; Cellular Component: extracellular exosome (GO:0070062);;	K13536|2.13577e-76|bta:539555|K13536 MARCKS-related protein | (RefSeq) MARCKSL1; MARCKS like 1	Fc gamma R-mediated phagocytosis (ko04666);; Leishmaniasis (ko05140)	--	--	MARCKS family	MARCKS-related protein OS=Bos taurus OX=9913 GN=MARCKSL1 PE=2 SV=1	O	Posttranslational modification, protein turnover, chaperones	PREDICTED: MARCKS-related protein [Bubalus bubalis]	molecular function: binding (GO:0005488);; cellular component: cell (GO:0005623);; cellular component: cell part (GO:0044464);; cellular component: membrane (GO:0016020);; biological process: biological regulation (GO:0065007);; cellular component: extracellular region (GO:0005576);; cellular component: organelle (GO:0043226);; cellular component: extracellular region part (GO:0044421)
gene-MATN2	5.69376	4.99027	4.81332	3.72351	4.8808	2.72487	3.67952	2.19912	3.1771	2.83677	3.15476	0.855282	-0.131636	normal	0.0310683	-0.625192	down	0.0186716	-0.628887	down	--	--	Biological Process: neuron migration (GO:0001764);; Molecular Function: calcium ion binding (GO:0005509);; Cellular Component: basement membrane (GO:0005604);; Biological Process: axon guidance (GO:0007411);; Biological Process: glial cell migration (GO:0008347);; Biological Process: dendrite regeneration (GO:0031104);; Biological Process: response to axon injury (GO:0048678);;	--	--	[T]	Signal transduction mechanisms	von Willebrand factor type A domain;; Coagulation Factor Xa inhibitory site;; Complement Clr-like EGF-like;; Calcium-binding EGF domain;; von Willebrand factor type A domain;; EGF-like domain;; Trimeric coiled-coil oligomerisation domain of matrilin;; EGF domain;; Human growth factor-like EGF	Fibrillin-1 OS=Bos taurus OX=9913 GN=FBN1 PE=1 SV=2	S	Function unknown	PREDICTED: matrilin-2 isoform X1 [Ovis aries musimon]	biological process: cellular process (GO:0009987);; biological process: locomotion (GO:0040011);; biological process: single-organism process (GO:0044699);; biological process: localization (GO:0051179);; molecular function: binding (GO:0005488);; cellular component: extracellular region (GO:0005576);; cellular component: extracellular region part (GO:0044421);; biological process: multicellular …
[truncated: 112 more rows]
