# Supplementary material for: Transcriptomics analysis reveals the effect of Broussonetia papyrifera L. fermented feed on meat quality traits in fattening lamb
Source: PeerJ. 2021 Apr 27;9:e11295. doi: 10.7717/peerj.11295 (PMC8086582; doi:10.7717/peerj.11295)
Supplement: Supplemental Information 5 [file peerj-09-11295-s005.xlsx]

## Sheet: cluster1
#ID	CK1	CK2	CK3	G181	G182	G21	G22	G23	G61	G62	G63	CK1_CK2_CK3_vs_G181_G182_DESeq2_FDR	CK1_CK2_CK3_vs_G181_G182_DESeq2_log2FC	CK1_CK2_CK3_vs_G181_G182_DESeq2_(FDR_0.05_FC_1.5)_regulated	CK1_CK2_CK3_vs_G21_G22_G23_DESeq2_FDR	CK1_CK2_CK3_vs_G21_G22_G23_DESeq2_log2FC	CK1_CK2_CK3_vs_G21_G22_G23_DESeq2_(FDR_0.05_FC_1.5)_regulated	CK1_CK2_CK3_vs_G61_G62_G63_DESeq2_FDR	CK1_CK2_CK3_vs_G61_G62_G63_DESeq2_log2FC	CK1_CK2_CK3_vs_G61_G62_G63_DESeq2_(FDR_0.05_FC_1.5)_regulated	COG_class	COG_class_annotation	GO_annotation	KEGG_annotation	KEGG_pathway_annotation	KOG_class	KOG_class_annotation	Pfam_annotation	Swiss_Prot_annotation	eggNOG_class	eggNOG_class_annotation	NR_annotation	GO_second_level_annotation
Ovis_aries_newGene_26572	1.10147	0.555237	1.2852	4.66481	2.00992	2.33807	2.60572	3.34061	1.22697	1.16642	0.806046	0.0325559	0.911147	up	0.00332837	1.0561	up	0.992168	0.0110144	normal	--	--	Molecular Function: magnesium ion binding (GO:0000287);; Molecular Function: protein serine/threonine kinase activity (GO:0004674);; Molecular Function: ATP binding (GO:0005524);; Cellular Component: nucleus (GO:0005634);; Cellular Component: cytoplasm (GO:0005737);; Biological Process: protein phosphorylation (GO:0006468);; Biological Process: regulation of mitotic cell cycle (GO:0007346);; Mole…	K19008|1.96858e-29|phd:102333505|K19008 serine/threonine-protein kinase SIK1 [EC:2.7.11.1] | (RefSeq) SIK1; salt inducible kinase 1	Glucagon signaling pathway (ko04922)	--	--	--	--	T	Signal transduction mechanisms	PREDICTED: serine/threonine-protein kinase SIK1 isoform X3 [Ovis aries musimon]	molecular function: binding (GO:0005488);; molecular function: catalytic activity (GO:0003824);; biological process: metabolic process (GO:0008152);; biological process: cellular process (GO:0009987);; cellular component: cell (GO:0005623);; cellular component: organelle (GO:0043226);; cellular component: cell part (GO:0044464);; biological process: biological regulation (GO:0065007);; biological…
gene-ARRDC3	1.10147	0.555237	1.2852	4.66481	2.00992	2.33807	2.60572	3.34061	1.22697	1.16642	0.806046	0.0325559	0.911147	up	0.00332837	1.0561	up	0.992168	0.0110144	normal	--	--	Molecular Function: magnesium ion binding (GO:0000287);; Molecular Function: protein serine/threonine kinase activity (GO:0004674);; Molecular Function: ATP binding (GO:0005524);; Cellular Component: nucleus (GO:0005634);; Cellular Component: cytoplasm (GO:0005737);; Biological Process: protein phosphorylation (GO:0006468);; Biological Process: regulation of mitotic cell cycle (GO:0007346);; Mole…	K19008|1.96858e-29|phd:102333505|K19008 serine/threonine-protein kinase SIK1 [EC:2.7.11.1] | (RefSeq) SIK1; salt inducible kinase 1	Glucagon signaling pathway (ko04922)	--	--	--	--	T	Signal transduction mechanisms	PREDICTED: serine/threonine-protein kinase SIK1 isoform X3 [Ovis aries musimon]	molecular function: binding (GO:0005488);; molecular function: catalytic activity (GO:0003824);; biological process: metabolic process (GO:0008152);; biological process: cellular process (GO:0009987);; cellular component: cell (GO:0005623);; cellular component: organelle (GO:0043226);; cellular component: cell part (GO:0044464);; biological process: biological regulation (GO:0065007);; biological…
gene-CEBPD	23.0075	10.2177	31.4022	72.7492	50.2582	50.8274	92.5959	92.0593	16.6167	35.8026	34.6683	0.00693034	1.02762	up	6.98e-06	1.38378	up	0.622731	0.312672	normal	--	--	Molecular Function: transcription factor activity, sequence-specific DNA binding (GO:0003700);; Cellular Component: nucleus (GO:0005634);; Biological Process: regulation of transcription, DNA-templated (GO:0006355);; Molecular Function: sequence-specific DNA binding (GO:0043565);;	K10050|9.07344e-115|ssc:100153946|K10050 CCAAT/enhancer binding protein (C/EBP), delta | (RefSeq) CEBPD; CCAAT/enhancer binding protein delta	--	[K]	Transcription	Basic region leucine zipper	CCAAT/enhancer-binding protein delta OS=Bos taurus OX=9913 GN=CEBPD PE=2 SV=1	K	Transcription	CCAAT/enhancer-binding protein delta [Sus scrofa]	molecular function: nucleic acid binding transcription factor activity (GO:0001071);; biological process: biological regulation (GO:0065007);; cellular component: cell (GO:0005623);; cellular component: organelle (GO:0043226);; cellular component: cell part (GO:0044464);; molecular function: binding (GO:0005488)
gene-GADD45G	5.32492	3.52164	11.4338	12.3691	29.0799	13.8824	47.9995	22.662	9.14626	9.77351	16.2281	0.0315814	0.915417	up	0.000237145	1.2659	up	0.307965	0.524205	normal	--	--	Biological Process: activation of MAPKKK activity (GO:0000185);; Cellular Component: nucleus (GO:0005634);; Cellular Component: cytoplasm (GO:0005737);; Biological Process: multicellular organism development (GO:0007275);; Biological Process: cell differentiation (GO:0030154);; Biological Process: positive regulation of apoptotic process (GO:0043065);; Biological Process: positive regulation of J…	K04402|4.73072e-106|phd:102343412|K04402 growth arrest and DNA-damage-inducible protein | (RefSeq) GADD45G; growth arrest and DNA damage inducible gamma	MAPK signaling pathway (ko04010);; FoxO signaling pathway (ko04068);; Cell cycle (ko04110);; p53 signaling pathway (ko04115);; Apoptosis (ko04210)	--	--	Ribosomal protein L7Ae/L30e/S12e/Gadd45 family	Growth arrest and DNA damage-inducible protein GADD45 gamma OS=Bos taurus OX=9913 GN=GADD45G PE=2 SV=1	O	Posttranslational modification, protein turnover, chaperones	PREDICTED: growth arrest and DNA damage-inducible protein GADD45 gamma [Pantholops hodgsonii]	biological process: biological regulation (GO:0065007);; cellular component: cell (GO:0005623);; cellular component: organelle (GO:0043226);; cellular component: cell part (GO:0044464);; biological process: multicellular organismal process (GO:0032501);; biological process: developmental process (GO:0032502);; biological process: single-organism process (GO:0044699);; biological process: cellular…
gene-LOC101119869	0.798068	0.473773	0.940119	10.7529	2.1771	1.19238	0.991555	1.83863	1.68856	0.498726	1.95516	0.000346794	1.22723	up	0.339318	0.549646	normal	0.514734	0.389623	normal	[J]	Translation, ribosomal structure and biogenesis	Biological Process: maturation of LSU-rRNA from tricistronic rRNA transcript (SSU-rRNA, 5.8S rRNA, LSU-rRNA) (GO:0000463);; Biological Process: blastocyst formation (GO:0001825);; Biological Process: cytoplasmic translation (GO:0002181);; Molecular Function: structural constituent of ribosome (GO:0003735);; Cellular Component: nucleolus (GO:0005730);; Cellular Component: cytosolic large ribosomal…	--	--	[J]	Translation, ribosomal structure and biogenesis	Ribosomal L30 N-terminal domain;; Ribosomal protein L30p/L7e	60S ribosomal protein L7-like 1 OS=Sus scrofa OX=9823 GN=RPL7L1 PE=3 SV=1	J	Translation, ribosomal structure and biogenesis	PREDICTED: 60S ribosomal protein L7-like 1 [Bison bison bison]	biological process: metabolic process (GO:0008152);; biological process: cellular process (GO:0009987);; biological process: cellular component organization or biogenesis (GO:0071840);; biological process: developmental process (GO:0032502);; biological process: single-organism process (GO:0044699);; molecular function: structural molecule activity (GO:0005198);; cellular component: cell (GO:0005…
gene-LOC114116592	4.03188	4.36653	4.72966	60.9193	65.7492	4.40072	36.6704	39.6636	43.699	30.4198	2.64329	9.86e-126	3.59979	up	0.0720878	0.738272	normal	0.264329	0.463743	normal	--	--	Molecular Function: nucleotide binding (GO:0000166);; Biological Process: behavioral fear response (GO:0001662);; Cellular Component: nucleus (GO:0005634);; Cellular Component: mitochondrial outer membrane (GO:0005741);; Cellular Component: mitochondrial inner membrane (GO:0005743);; Cellular Component: plasma membrane (GO:0005886);; Biological Process: apoptotic process (GO:0006915);; Biological…	K05862|0|ocu:100008751|K05862 voltage-dependent anion channel protein 1 | (RefSeq) VDAC1; voltage dependent anion channel 1	Calcium signaling pathway (ko04020);; cGMP-PKG signaling pathway (ko04022);; Parkinson's disease (ko05012);; Huntington's disease (ko05016);; Influenza A (ko05164);; HTLV-I infection (ko05166)	[P]	Inorganic ion transport and metabolism	Eukaryotic porin	Voltage-dependent anion-selective channel protein 1 OS=Oryctolagus cuniculus OX=9986 GN=VDAC1 PE=2 SV=3	U	Intracellular trafficking, secretion, and vesicular transport	Voltage-dependent anion-selective channel protein 1, partial [Bos mutus]	molecular function: binding (GO:0005488);; biological process: behavior (GO:0007610);; biological process: multicellular organismal process (GO:0032501);; biological process: single-organism process (GO:0044699);; biological process: response to stimulus (GO:0050896);; cellular component: cell (GO:0005623);; cellular component: organelle (GO:0043226);; cellular component: cell part (GO:0044464);;…
gene-NFIL3	5.58906	3.87105	8.96795	22.1519	21.4066	16.3455	20.8778	20.6166	3.7893	9.05308	11.9941	2.75e-06	1.37537	up	2.87e-07	1.36876	up	0.682956	0.279537	normal	--	--	Biological Process: negative regulation of transcription from RNA polymerase II promoter (GO:0000122);; Molecular Function: RNA polymerase II core promoter sequence-specific DNA binding (GO:0000979);; Molecular Function: transcriptional repressor activity, RNA polymerase II core promoter proximal region sequence-specific binding (GO:0001078);; Cellular Component: nucleus (GO:0005634);; Biological…	K09059|0|phd:102316639|K09059 nuclear factor, interleukin 3 regulated | (RefSeq) NFIL3; nuclear factor, interleukin 3 regulated	--	[K]	Transcription	Vertebrate interleukin-3 regulated transcription factor;; Basic region leucine zipper	Nuclear factor interleukin-3-regulated protein OS=Bos taurus OX=9913 GN=NFIL3 PE=2 SV=1	K	Transcription	nuclear factor interleukin-3-regulated protein [Ovis aries]	biological process: biological regulation (GO:0065007);; molecular function: binding (GO:0005488);; molecular function: nucleic acid binding transcription factor activity (GO:0001071);; cellular component: cell (GO:0005623);; cellular component: organelle (GO:0043226);; cellular component: cell part (GO:0044464);; biological process: immune system process (GO:0002376);; biological process: respon…
gene-NR4A2	5.53976	2.01659	3.59709	17.6199	2.02132	10.6213	4.89287	14.4091	1.4491	6.26146	1.40323	0.611754	0.281707	normal	0.0191961	0.939155	up	0.94364	-0.0619776	normal	--	--	Biological Process: negative regulation of transcription from RNA polymerase II promoter (GO:0000122);; Molecular Function: RNA polymerase II core promoter sequence-specific DNA binding (GO:0000979);; Molecular Function: transcriptional activator activity, RNA polymerase II core promoter proximal region sequence-specific binding (GO:0001077);; Biological Process: response to hypoxia (GO:0001666);…	K08558|0|ssc:100157120|K08558 nuclear receptor subfamily 4 group A member 2 | (RefSeq) NR4A2; nuclear receptor subfamily 4 group A member 2	Aldosterone synthesis and secretion (ko04925)	[K]	Transcription	Zinc finger, C4 type (two domains);; Ligand-binding domain of nuclear hormone receptor	Nuclear receptor subfamily 4 group A member 2 OS=Bos taurus OX=9913 GN=NR4A2 PE=2 SV=1	K	Transcription	nuclear receptor subfamily 4 group A member 2 [Sus scrofa]	biological process: biological regulation (GO:0065007);; molecular function: binding (GO:0005488);; molecular function: nucleic acid binding transcription factor activity (GO:0001071);; biological process: metabolic process (GO:0008152);; biological process: cellular process (GO:0009987);; biological process: response to stimulus (GO:0050896);; biological process: locomotion (GO:0040011);; biolog…
gene-SGK1	3.90411	4.37694	3.79931	17.47	9.98091	11.7949	6.4928	4.74862	3.33191	6.40306	2.55564	1.42e-06	1.33886	up	0.116022	0.688402	normal	0.997458	0.00233001	normal	[T]	Signal transduction mechanisms	Biological Process: regulation of cell growth (GO:0001558);; Molecular Function: protein serine/threonine kinase activity (GO:0004674);; Molecular Function: protein serine/threonine/tyrosine kinase activity (GO:0004712);; Molecular Function: calcium channel regulator activity (GO:0005246);; Molecular Function: ATP binding (GO:0005524);; Cellular Component: nucleoplasm (GO:0005654);; Cellular Comp…	K13302|0|pale:102891704|K13302 serum/glucocorticoid-regulated kinase 1 [EC:2.7.11.1] | (RefSeq) SGK1; serine/threonine-protein kinase Sgk1	FoxO signaling pathway (ko04068);; mTOR signaling pathway (ko04150);; PI3K-Akt signaling pathway (ko04151);; Aldosterone-regulated sodium reabsorption (ko04960)	[RT]	General function prediction only;; Signal transduction mechanisms	Protein kinase domain;; Protein tyrosine kinase;; Protein kinase C terminal domain;; Kinase-like	Serine/threonine-protein kinase Sgk1 OS=Bos taurus OX=9913 GN=SGK1 PE=2 SV=1	T	Signal transduction mechanisms	PREDICTED: serine/threonine-protein kinase Sgk1 isoform X2 [Bos taurus]	biological process: biological regulation (GO:0065007);; molecular function: catalytic activity (GO:0003824);; biological process: metabolic process (GO:0008152);; biological process: cellular process (GO:0009987);; molecular function: molecular function regulator (GO:0098772);; molecular function: binding (GO:0005488);; cellular component: cell (GO:0005623);; cellular component: organelle (GO:00…
gene-SIK1	5.50054	4.85713	12.3304	30.7296	12.4524	11.8726	22.65	17.9012	10.5445	8.06198	9.91189	0.289726	0.560288	normal	0.00673938	0.950007	up	0.660089	0.270829	normal	[T]	Signal transduction mechanisms	Molecular Function: magnesium ion binding (GO:0000287);; Molecular Function: protein serine/threonine kinase activity (GO:0004674);; Molecular Function: ATP binding (GO:0005524);; Cellular Component: nucleus (GO:0005634);; Cellular Component: cytoplasm (GO:0005737);; Biological Process: protein phosphorylation (GO:0006468);; Biological Process: regulation of mitotic cell cycle (GO:0007346);; Mole…	K19008|0|phd:102333505|K19008 serine/threonine-protein kinase SIK1 [EC:2.7.11.1] | (RefSeq) SIK1; salt inducible kinase 1	Glucagon signaling pathway (ko04922)	[R]	General function prediction only	Protein kinase domain;; Protein tyrosine kinase;; Kinase-like	Serine/threonine-protein kinase SIK2 OS=Pongo abelii OX=9601 GN=SIK2 PE=2 SV=1	T	Signal transduction mechanisms	PREDICTED: serine/threonine-protein kinase SIK1 isoform X2 [Ovis aries musimon]	molecular function: binding (GO:0005488);; molecular function: catalytic activity (GO:0003824);; biological process: metabolic process (GO:0008152);; biological process: cellular process (GO:0009987);; cellular component: cell (GO:0005623);; cellular component: organelle (GO:0043226);; cellular component: cell part (GO:0044464);; biological process: biological regulation (GO:0065007);; biological…

## Sheet: cluster2
#ID	CK1	CK2	CK3	G181	G182	G21	G22	G23	G61	G62	G63	CK1_CK2_CK3_vs_G181_G182_DESeq2_FDR	CK1_CK2_CK3_vs_G181_G182_DESeq2_log2FC	CK1_CK2_CK3_vs_G181_G182_DESeq2_(FDR_0.05_FC_1.5)_regulated	CK1_CK2_CK3_vs_G21_G22_G23_DESeq2_FDR	CK1_CK2_CK3_vs_G21_G22_G23_DESeq2_log2FC	CK1_CK2_CK3_vs_G21_G22_G23_DESeq2_(FDR_0.05_FC_1.5)_regulated	CK1_CK2_CK3_vs_G61_G62_G63_DESeq2_FDR	CK1_CK2_CK3_vs_G61_G62_G63_DESeq2_log2FC	CK1_CK2_CK3_vs_G61_G62_G63_DESeq2_(FDR_0.05_FC_1.5)_regulated	COG_class	COG_class_annotation	GO_annotation	KEGG_annotation	KEGG_pathway_annotation	KOG_class	KOG_class_annotation	Pfam_annotation	Swiss_Prot_annotation	eggNOG_class	eggNOG_class_annotation	NR_annotation	GO_second_level_annotation
Ovis_aries_newGene_6650	4.57499	3.20605	4.31672	1.54671	0.936298	1.77672	2.45872	2.23655	3.25614	2.81208	2.61584	0.00613889	-1.02101	down	0.056825	-0.703483	normal	0.878282	-0.123441	normal	--	--	Cellular Component: intracellular part (GO:0044424);; Molecular Function: metal ion binding (GO:0046872);;	--	--	--	--	--	--	--	--	PREDICTED: uncharacterized protein LOC105605488 [Ovis aries]	cellular component: cell (GO:0005623);; cellular component: cell part (GO:0044464);; molecular function: binding (GO:0005488)
ABCB1	1.66517	1.73066	1.1212	0.54512	0.314487	0.563942	0.68616	0.214955	1.06292	0.307076	1.1908	0.00888442	-1.00541	down	0.0266014	-0.900543	down	0.479442	-0.416388	normal	[V]	Defense mechanisms	Biological Process: G2/M transition of mitotic cell cycle (GO:0000086);; Biological Process: antigen processing and presentation of exogenous protein antigen via MHC class Ib, TAP-dependent (GO:0002481);; Biological Process: antigen processing and presentation of endogenous peptide antigen via MHC class I via ER pathway, TAP-dependent (GO:0002485);; Biological Process: antigen processing and pres…	K05658|0|oas:443367|K05658 ATP-binding cassette, subfamily B (MDR/TAP), member 1 [EC:3.6.3.44] | (RefSeq) ABCB1, MDR1, Pgp; ATP-binding cassette, sub-family B (MDR/TAP), member 1	ABC transporters (ko02010);; Bile secretion (ko04976);; MicroRNAs in cancer (ko05206)	[Q]	Secondary metabolites biosynthesis, transport and catabolism	ABC transporter transmembrane region;; ABC transporter;; AAA ATPase domain;; Zeta toxin;; RsgA GTPase;; AAA domain;; AAA domain (dynein-related subfamily);; Rad17 cell cycle checkpoint protein;; ATPase family associated with various cellular activities (AAA);; ABC transporter	Bile salt export pump OS=Oryctolagus cuniculus OX=9986 GN=ABCB11 PE=2 SV=1	V	Defense mechanisms	multidrug resistance protein 1 [Ovis aries]	biological process: cellular process (GO:0009987);; biological process: single-organism process (GO:0044699);; biological process: immune system process (GO:0002376);; biological process: biological regulation (GO:0065007);; molecular function: binding (GO:0005488);; cellular component: cell (GO:0005623);; cellular component: cell part (GO:0044464);; cellular component: membrane (GO:0016020);; ce…
AHCYL2	33.7383	34.6527	43.9002	17.3644	16.0634	17.7471	19.3379	19.5203	26.4554	34.6753	30.5974	4.52e-06	-0.929726	down	7.25e-05	-0.770754	down	0.648076	-0.208568	normal	[H]	Coenzyme transport and metabolism	Molecular Function: adenosylhomocysteinase activity (GO:0004013);; Molecular Function: protein binding (GO:0005515);; Cellular Component: endoplasmic reticulum (GO:0005783);; Cellular Component: cytosol (GO:0005829);; Biological Process: one-carbon metabolic process (GO:0006730);; Biological Process: S-adenosylmethionine cycle (GO:0033353);; Cellular Component: neuron projection (GO:0043005);;	K01251|0|bta:532836|K01251 adenosylhomocysteinase [EC:3.3.1.1] | (RefSeq) AHCYL2, IRBIT2; adenosylhomocysteinase like 2	Cysteine and methionine metabolism (ko00270)	[H]	Coenzyme transport and metabolism	S-adenosyl-L-homocysteine hydrolase;; S-adenosyl-L-homocysteine hydrolase, NAD binding domain;; D-isomer specific 2-hydroxyacid dehydrogenase, NAD binding domain	Adenosylhomocysteinase 3 OS=Bos taurus OX=9913 GN=AHCYL2 PE=1 SV=1	H	Coenzyme transport and metabolism	adenosylhomocysteinase 3 isoform X1 [Felis catus]	molecular function: catalytic activity (GO:0003824);; molecular function: binding (GO:0005488);; cellular component: cell (GO:0005623);; cellular component: organelle (GO:0043226);; cellular component: cell part (GO:0044464);; biological process: metabolic process (GO:0008152);; biological process: cellular process (GO:0009987);; biological process: single-organism process (GO:0044699)
BHLHE40	87.979	66.1659	92.3922	38.6427	13.7856	32.9439	26.3045	34.1903	37.2612	43.1008	56.2686	0.0218871	-0.919698	down	1.21e-05	-1.04935	down	0.0532264	-0.652217	normal	--	--	Biological Process: negative regulation of transcription from RNA polymerase II promoter (GO:0000122);; Molecular Function: transcriptional repressor activity, RNA polymerase II core promoter proximal region sequence-specific binding (GO:0001078);; Molecular Function: RNA polymerase II activating transcription factor binding (GO:0001102);; Molecular Function: transcriptional repressor activity, R…	K03729|0|oas:100169939|K03729 class B basic helix-loop-helix protein 2 | (RefSeq) BHLHE40, BHLHB2; basic helix-loop-helix family member e40	Circadian rhythm (ko04710)	[K]	Transcription	Helix-loop-helix DNA-binding domain;; Hairy Orange	Class E basic helix-loop-helix protein 40 OS=Ovis aries OX=9940 GN=BHLHE40 PE=2 SV=1	K	Transcription	class E basic helix-loop-helix protein 40 [Ovis aries]	biological process: biological regulation (GO:0065007);; molecular function: nucleic acid binding transcription factor activity (GO:0001071);; molecular function: binding (GO:0005488);; molecular function: transcription factor activity, protein binding (GO:0000988);; cellular component: cell (GO:0005623);; cellular component: organelle (GO:0043226);; cellular component: organelle part (GO:0044422…
gene-CCN1	72.6982	55.9288	87.1984	62.6628	24.7848	35.9199	32.8288	23.8683	36.8146	113.504	41.2252	0.575797	-0.372886	normal	0.000651943	-0.896654	down	0.944766	-0.0665501	normal	--	--	Biological Process: regulation of cell growth (GO:0001558);; Biological Process: intussusceptive angiogenesis (GO:0002041);; Biological Process: atrioventricular valve morphogenesis (GO:0003181);; Biological Process: apoptotic process involved in heart morphogenesis (GO:0003278);; Biological Process: ventricular septum development (GO:0003281);; Molecular Function: integrin binding (GO:0005178);;…	K06829|0|oas:100037673|K06829 cysteine rich protein 61 | (RefSeq) CYR61; cysteine rich angiogenic inducer 61	--	--	--	Cystine-knot domain;; Insulin-like growth factor binding protein;; von Willebrand factor type C domain	Protein CYR61 OS=Pan troglodytes OX=9598 GN=CYR61 PE=2 SV=1	O	Posttranslational modification, protein turnover, chaperones	PREDICTED: protein CYR61 isoform X1, partial [Ovis aries]	biological process: biological regulation (GO:0065007);; biological process: multicellular organismal process (GO:0032501);; biological process: developmental process (GO:0032502);; biological process: single-organism process (GO:0044699);; biological process: cellular process (GO:0009987);; molecular function: binding (GO:0005488);; cellular component: extracellular region (GO:0005576);; cellula…
CISH	27.7426	48.1421	45.5767	12.5724	11.759	30.4311	20.5033	6.64915	4.25485	20.0686	60.7619	1.85e-05	-1.22091	down	0.597006	-0.358032	normal	0.909713	-0.082531	normal	--	--	Molecular Function: protein kinase inhibitor activity (GO:0004860);; Cellular Component: cytoplasm (GO:0005737);; Cellular Component: plasma membrane (GO:0005886);; Biological Process: negative regulation of protein kinase activity (GO:0006469);; Biological Process: protein kinase C-activating G-protein coupled receptor signaling pathway (GO:0007205);; Biological Process: protein ubiquitination (…	K04701|6.22069e-169|oas:101119259|K04701 cytokine inducible SH2-containing protein | (RefSeq) CISH; cytokine inducible SH2 containing protein	Jak-STAT signaling pathway (ko04630);; Prolactin signaling pathway (ko04917)	[T]	Signal transduction mechanisms	SH2 domain;; SOCS box	Cytokine-inducible SH2-containing protein OS=Bos taurus OX=9913 GN=CISH PE=2 SV=1	O	Posttranslational modification, protein turnover, chaperones	PREDICTED: cytokine-inducible SH2-containing protein isoform X1 [Ovis aries]	molecular function: molecular function regulator (GO:0098772);; biological process: biological regulation (GO:0065007);; cellular component: cell (GO:0005623);; cellular component: cell part (GO:0044464);; cellular component: membrane (GO:0016020);; biological process: cellular process (GO:0009987);; biological process: signaling (GO:0023052);; biological process: single-organism process (GO:0044…
gene-EMILIN3	5.13671	4.47536	2.29656	2.05708	1.72409	1.26273	1.01662	0.878215	1.8636	3.517	2.4945	0.255526	-0.603543	normal	0.000213135	-1.20788	down	0.545033	-0.356155	normal	--	--	Cellular Component: cytoplasm (GO:0005737);;	--	--	--	--	EMI domain	--	S	Function unknown	PREDICTED: EMILIN-3 [Ovis aries musimon]	cellular component: cell (GO:0005623);; cellular component: cell part (GO:0044464)
gene-EMILIN3	5.13671	4.47536	2.29656	2.05708	1.72409	1.26273	1.01662	0.878215	1.8636	3.517	2.4945	0.255526	-0.603543	normal	0.000213135	-1.20788	down	0.545033	-0.356155	normal	--	--	Cellular Component: cytoplasm (GO:0005737);;	--	--	--	--	EMI domain	--	S	Function unknown	PREDICTED: EMILIN-3 [Ovis aries musimon]	cellular component: cell (GO:0005623);; cellular component: cell part (GO:0044464)
FAM124B	2.1657	2.62933	2.99987	0.855643	0.909644	0.349776	0.758956	0.40016	1.30086	1.1506	1.04478	0.000512352	-1.06838	down	8.35e-09	-1.61764	down	0.00553494	-0.869536	down	--	--	--	--	--	--	--	FAM124 family	Protein FAM124B OS=Bos taurus OX=9913 GN=FAM124B PE=2 SV=1	S	Function unknown	PREDICTED: protein FAM124B [Ovis aries]	--
FZD7	18.0903	20.2566	24.5781	10.2377	9.55229	6.6082	14.4279	7.92611	23.3567	15.3636	21.2882	0.000243779	-0.845395	down	0.0046453	-0.833049	down	0.970887	-0.0264029	normal	--	--	Molecular Function: G-protein coupled receptor activity (GO:0004930);; Molecular Function: frizzled binding (GO:0005109);; Cellular Component: plasma membrane (GO:0005886);; Biological Process: G-protein coupled receptor signaling pathway (GO:0007186);; Biological Process: negative regulation of cell-substrate adhesion (GO:0010812);; Biological Process: skeletal muscle satellite cell maintenance …	K02432|0|phd:102319085|K02432 frizzled 1/7 | (RefSeq) FZD7; frizzled class receptor 7	mTOR signaling pathway (ko04150);; Wnt signaling pathway (ko04310);; Hippo signaling pathway (ko04390);; Signaling pathways regulating pluripotency of stem cells (ko04550);; Melanogenesis (ko04916);; HTLV-I infection (ko05166);; Pathways in cancer (ko05200);; Proteoglycans in cancer (ko05205);; Basal cell carcinoma (ko05217)	[T]	Signal transduction mechanisms	Frizzled/Smoothened family membrane region;; Fz domain	Frizzled-6 OS=Pongo abelii OX=9601 GN=FZD6 PE=2 SV=1	U	Intracellular trafficking, secretion, and vesicular transport	PREDICTED: LOW QUALITY PROTEIN: frizzled-7 [Pantholops hodgsonii]	molecular function: signal transducer activity (GO:0004871);; molecular function: molecular transducer activity (GO:0060089);; biological process: cellular process (GO:0009987);; biological process: signaling (GO:0023052);; biological process: single-organism process (GO:0044699);; biological process: response to stimulus (GO:0050896);; biological process: biological regulation (GO:0065007);; mol…
gene-GASK1B	19.7742	18.5878	11.3619	5.68861	12.1856	8.75722	7.56471	6.44539	11.9296	13.7074	10.8688	0.371014	-0.505972	normal	0.0266014	-0.766772	down	0.526094	-0.321966	normal	--	--	Cellular Component: Golgi apparatus (GO:0005794);;	--	--	--	--	FAM198 protein	--	U	Intracellular trafficking, secretion, and vesicular transport	PREDICTED: protein FAM198B isoform X3 [Ovis aries musimon]	cellular component: cell (GO:0005623);; cellular component: organelle (GO:0043226);; cellular component: cell part (GO:0044464)
gene-GHSR	0.435902	0.332156	2.52365	0.126994	0.331772	0.156506	0.139544	0.122065	1.46634	0.220636	0.13746	0.399629	-0.476101	normal	0.0324163	-0.882403	down	0.85775	-0.140612	normal	--	--	Molecular Function: growth hormone secretagogue receptor activity (GO:0001616);; Cellular Component: plasma membrane (GO:0005886);; Biological Process: G-protein coupled receptor signaling pathway (GO:0007186);; Biological Process: actin polymerization or depolymerization (GO:0008154);; Biological Process: adult feeding behavior (GO:0008343);; Biological Process: hormone-mediated signaling pathwa…	K04284|0|oas:443238|K04284 growth hormone secretagogue receptor | (RefSeq) GHSR; growth hormone secretagogue receptor	cAMP signaling pathway (ko04024);; Neuroactive ligand-receptor interaction (ko04080)	[R]	General function prediction only	7 transmembrane receptor (rhodopsin family);; Serpentine type 7TM GPCR chemoreceptor Srw;; Serpentine type 7TM GPCR chemoreceptor Srsx	Growth hormone secretagogue receptor type 1 OS=Mustela putorius furo OX=9669 GN=GHSR PE=2 SV=1	U	Intracellular trafficking, secretion, and vesicular transport	growth hormone secretagogue receptor type 1 [Ovis aries]	molecular function: signal transducer activity (GO:0004871);; molecular function: molecular transducer activity (GO:0060089);; biological process: cellular process (GO:0009987);; biological process: signaling (GO:0023052);; biological process: single-organism process (GO:0044699);; biological process: response to stimulus (GO:0050896);; biological process: biological regulation (GO:0065007);; cel…
gene-HCLS1	3.27154	2.71993	2.18681	0.716642	1.72858	0.965536	1.40255	1.09142	2.21873	1.8221	1.41017	0.276626	-0.601199	normal	0.00792461	-0.864649	down	0.4087	-0.410039	normal	--	--	Biological Process: negative regulation of transcription from RNA polymerase II promoter (GO:0000122);; Molecular Function: RNA polymerase II transcription factor binding (GO:0001085);; Molecular Function: actin binding (GO:0003779);; Cellular Component: nucleus (GO:0005634);; Cellular Component: transcription factor complex (GO:0005667);; Cellular Component: Golgi apparatus (GO:0005794);; Biolog…	K06106|0|oas:101110196|K06106 cortactin | (RefSeq) HCLS1; hematopoietic cell-specific Lyn substrate 1	Tight junction (ko04530);; Bacterial invasion of epithelial cells (ko05100);; Proteoglycans in cancer (ko05205)	--	--	Repeat in HS1/Cortactin;; SH3 domain;; Variant SH3 domain;; Variant SH3 domain	Drebrin-like protein OS=Bos taurus OX=9913 GN=DBNL PE=2 SV=1	Z	Cytoskeleton	PREDICTED: hematopoietic lineage cell-specific protein [Ovis aries]	biological process: biological regulation (GO:0065007);; molecular function: binding (GO:0005488);; cellular component: cell (GO:0005623);; cellular component: organelle (GO:0043226);; cellular component: cell part (GO:0044464);; cellular component: macromolecular complex (GO:0032991);; biological process: response to stimulus (GO:0050896);; biological process: immune system process (GO:0002376);…
IER2	39.5774	26.1099	29.3833	17.1341	14.5496	24.3003	15.5886	21.321	20.9557	40.5306	14.2601	0.0165643	-0.729722	down	0.484995	-0.366859	normal	0.801586	-0.185884	normal	--	--	Molecular Function: DNA binding (GO:0003677);; Cellular Component: nucleoplasm (GO:0005654);; Cellular Component: cytoplasm (GO:0005737);; Biological Process: cell motility (GO:0048870);;	--	--	--	--	Immediate early response protein (IER)	--	O	Posttranslational modification, protein turnover, chaperones	PREDICTED: immediate early response gene 2 protein [Ovis aries musimon]	molecular function: binding (GO:0005488);; cellular component: cell (GO:0005623);; cellular component: organelle (GO:0043226);; cellular component: organelle part (GO:0044422);; cellular component: cell part (GO:0044464);; biological process: cellular process (GO:0009987);; biological process: locomotion (GO:0040011);; biological process: single-organism process (GO:0044699)
KCNJ2	6.78616	11.2561	7.55557	4.4919	2.52786	2.87104	3.82969	2.62904	12.0163	6.49412	5.81692	0.0361188	-0.814502	down	2.98e-05	-1.0821	down	0.927076	-0.0779742	normal	[S]	Function unknown	Molecular Function: inward rectifier potassium channel activity (GO:0005242);; Molecular Function: phosphatidylinositol-4,5-bisphosphate binding (GO:0005546);; Cellular Component: voltage-gated potassium channel complex (GO:0008076);; Biological Process: potassium ion import (GO:0010107);; Biological Process: regulation of skeletal muscle contraction via regulation of action potential (GO:0014861…	K04996|0|ptg:102967064|K04996 potassium inwardly-rectifying channel subfamily J member 2 | (RefSeq) KCNJ2; potassium voltage-gated channel subfamily J member 2	Cholinergic synapse (ko04725);; Oxytocin signaling pathway (ko04921);; Renin secretion (ko04924);; Gastric acid secretion (ko04971)	[P]	Inorganic ion transport and metabolism	Inward rectifier potassium channel;; Inward rectifier potassium channel N-terminal	Inward rectifier potassium channel 2 OS=Bos taurus OX=9913 GN=KCNJ2 PE=2 SV=1	U	Intracellular trafficking, secretion, and vesicular transport	Inward rectifier potassium channel 2 [Pteropus alecto]	molecular function: transporter activity (GO:0005215);; molecular function: molecular transducer activity (GO:0060089);; biological process: cellular process (GO:0009987);; biological process: single-organism process (GO:0044699);; biological process: localization (GO:0051179);; biological process: biological regulation (GO:0065007);; molecular function: binding (GO:0005488);; cellular component:…
gene-LOC101110257	2.78836	3.02803	2.67644	1.30021	1.34932	1.00558	1.55201	1.39936	2.27803	2.63544	2.02772	0.102492	-0.700692	normal	0.0451017	-0.736503	down	0.776342	-0.188951	normal	[H]	Coenzyme transport and metabolism	Molecular Function: serine C-palmitoyltransferase activity (GO:0004758);; Cellular Component: integral component of membrane (GO:0016021);; Cellular Component: serine C-palmitoyltransferase complex (GO:0017059);; Molecular Function: pyridoxal phosphate binding (GO:0030170);; Biological Process: sphingoid biosynthetic process (GO:0046520);;	K00654|0|chx:102184072|K00654 serine palmitoyltransferase [EC:2.3.1.50] | (RefSeq) SPTLC3; serine palmitoyltransferase long chain base subunit 3	Sphingolipid metabolism (ko00600);; Sphingolipid signaling pathway (ko04071)	[O]	Posttranslational modification, protein turnover, chaperones	Aminotransferase class I and II	Serine palmitoyltransferase 1 OS=Macaca fascicularis OX=9541 GN=SPTLC1 PE=2 SV=1	H	Coenzyme transport and metabolism	PREDICTED: serine palmitoyltransferase 3 [Ovis aries musimon]	molecular function: catalytic activity (GO:0003824);; cellular component: membrane (GO:0016020);; cellular component: membrane part (GO:0044425);; cellular component: cell (GO:0005623);; cellular component: macromolecular complex (GO:0032991);; cellular component: organelle (GO:0043226);; cellular component: organelle part (GO:0044422);; cellular component: cell part (GO:0044464);; molecular func…
gene-LOC105601845	126.584	62.8687	96.5692	48.1596	52.6047	44.0824	52.4944	48.208	106.514	118.251	45.1509	0.153708	-0.60847	normal	0.0289644	-0.690486	down	0.977737	-0.028251	normal	[J]	Translation, ribosomal structure and biogenesis	Biological Process: ribosomal large subunit assembly (GO:0000027);; Molecular Function: structural constituent of ribosome (GO:0003735);; Cellular Component: nucleus (GO:0005634);; Cellular Component: polysome (GO:0005844);; Biological Process: translation (GO:0006412);; Biological Process: spermatogenesis (GO:0007283);; Cellular Component: membrane (GO:0016020);; Cellular Component: cytosolic la…	K02866|1.82626e-158|phd:102327737|K02866 large subunit ribosomal protein L10e | (RefSeq) RPL10; ribosomal protein L10	Ribosome (ko03010)	[J]	Translation, ribosomal structure and biogenesis	Ribosomal protein L16p/L10e	60S ribosomal protein L10 OS=Ovis aries OX=9940 GN=RPL10 PE=2 SV=1	J	Translation, ribosomal structure and biogenesis	PREDICTED: 60S ribosomal protein L10 isoform X1 [Pantholops hodgsonii]	biological process: cellular process (GO:0009987);; biological process: cellular component organization or biogenesis (GO:0071840);; molecular function: structural molecule activity (GO:0005198);; cellular component: cell (GO:0005623);; cellular component: organelle (GO:0043226);; cellular component: cell part (GO:0044464);; cellular component: macromolecular complex (GO:0032991);; biological pro…
LOC114108784	2.24159	1.05219	1.76604	0.036311	0.044403	0.823939	0	0.203068	0.085058	0.689097	0.554756	1.7e-19	-2.48689	down	0.740483	-0.145213	normal	0.108895	-0.735023	normal	--	--	Molecular Function: ubiquitin-protein transferase activity (GO:0004842);; Cellular Component: nucleoplasm (GO:0005654);; Cellular Component: cytoplasm (GO:0005737);; Biological Process: double-strand break repair (GO:0006302);; Molecular Function: zinc ion binding (GO:0008270);; Biological Process: histone monoubiquitination (GO:0010390);; Molecular Function: ligase activity (GO:0016874);; Molecu…	K06058|0|phd:102324652|K06058 deltex [EC:2.3.2.27] | (RefSeq) DTX3L; deltex E3 ubiquitin ligase 3L	Notch signaling pathway (ko04330)	--	--	Ring finger domain;; Zinc finger, C3HC4 type (RING finger);; Zinc finger, C3HC4 type (RING finger);; Zinc finger, C3HC4 type (RING finger)	Probable E3 ubiquitin-protein ligase DTX3 OS=Pongo abelii OX=9601 GN=DTX3 PE=2 SV=1	O	Posttranslational modification, protein turnover, chaperones	PREDICTED: E3 ubiquitin-protein ligase DTX3L isoform X2 [Ovis aries musimon]	molecular function: catalytic activity (GO:0003824);; cellular component: cell (GO:0005623);; cellular component: organelle (GO:0043226);; cellular component: organelle part (GO:0044422);; cellular component: cell part (GO:0044464);; biological process: metabolic process (GO:0008152);; biological process: cellular process (GO:0009987);; biological process: response to stimulus (GO:0050896);; mole…
gene-MYOD1	17.3775	15.2225	12.8207	10.2892	8.29388	6.70948	6.84248	5.85032	18.3101	7.22263	12.3555	0.237136	-0.485644	normal	3.55e-05	-0.946521	down	0.80563	-0.173915	normal	--	--	Biological Process: regulation of alternative mRNA splicing, via spliceosome (GO:0000381);; Cellular Component: nuclear chromatin (GO:0000790);; Molecular Function: RNA polymerase II core promoter proximal region sequence-specific DNA binding (GO:0000978);; Molecular Function: core promoter binding (GO:0001047);; Molecular Function: transcriptional activator activity, RNA polymerase II transcript…	K09064|1.88885e-166|oas:443405|K09064 myogenic factor 3 | (RefSeq) MYOD1; myogenic differentiation 1	--	[K]	Transcription	Myogenic Basic domain;; Myogenic determination factor 5;; Helix-loop-helix DNA-binding domain	Myoblast determination protein 1 OS=Ovis aries OX=9940 GN=MYOD1 PE=2 SV=1	K	Transcription	myoblast determination protein 1 [Ovis aries]	biological process: biological regulation (GO:0065007);; cellular component: cell (GO:0005623);; cellular component: membrane-enclosed lumen (GO:0031974);; cellular component: organelle (GO:0043226);; cellular component: organelle part (GO:0044422);; cellular component: cell part (GO:0044464);; molecular function: binding (GO:0005488);; molecular function: nucleic acid binding transcription facto…
gene-NEURL1B	5.00896	6.20584	4.74545	2.97427	3.26651	1.73237	2.42385	2.11634	3.93754	4.59343	2.95253	0.0987769	-0.579062	normal	1.97e-06	-1.04748	down	0.300012	-0.403921	normal	--	--	Cellular Component: early endosome (GO:0005769);; Molecular Function: zinc ion binding (GO:0008270);; Molecular Function: ligase activity (GO:0016874);; Biological Process: ubiquitin-dependent endocytosis (GO:0070086);;	K01931|0|chx:102179812|K01931 protein neuralized [EC:2.3.2.27] | (RefSeq) NEURL1B; neuralized E3 ubiquitin protein ligase 1B	--	[T]	Signal transduction mechanisms	Neuralized;; Zinc finger, C3HC4 type (RING finger)	--	S	Function unknown	PREDICTED: E3 ubiquitin-protein ligase NEURL1B isoform X1 [Ovis aries musimon]	cellular component: cell (GO:0005623);; cellular component: organelle (GO:0043226);; cellular component: cell part (GO:0044464);; molecular function: binding (GO:0005488);; molecular function: catalytic activity (GO:0003824);; biological process: single-organism process (GO:0044699);; biological process: localization (GO:0051179)
NID2	18.2432	17.6258	18.3712	9.03865	11.0925	8.52626	12.9143	9.47219	14.8714	13.6043	14.3338	0.000931651	-0.670669	down	0.000659525	-0.639414	down	0.309485	-0.279524	normal	[G]	Carbohydrate transport and metabolism	Molecular Function: calcium ion binding (GO:0005509);; Cellular Component: basement membrane (GO:0005604);; Biological Process: cell-matrix adhesion (GO:0007160);; Cellular Component: extracellular exosome (GO:0070062);;	K06826|0|oas:101107101|K06826 nidogen (entactin) | (RefSeq) NID2; nidogen 2	--	[MW]	Cell wall/membrane/envelope biogenesis;; Extracellular structures	G2F domain;; Low-density lipoprotein receptor repeat class B;; EGF domain;; Calcium-binding EGF domain;; Nidogen-like;; Complement Clr-like EGF-like;; Thyroglobulin type-1 repeat;; EGF-like domain;; SMP-30/Gluconolaconase/LRE-like region	Pro-epidermal growth factor OS=Canis lupus familiaris OX=9615 GN=EGF PE=2 SV=1	O	Posttranslational modification, protein turnover, chaperones	PREDICTED: nidogen-2 [Ovis aries musimon]	molecular function: binding (GO:0005488);; cellular component: extracellular region (GO:0005576);; cellular component: extracellular region part (GO:0044421);; biological process: biological adhesion (GO:0022610);; cellular component: organelle (GO:0043226)
gene-NR1D1	35.6442	45.8426	40.1838	24.4683	17.7637	15.0936	24.3242	16.4356	40.2216	39.307	33.6199	0.0526482	-0.672461	normal	0.000121847	-0.884605	down	0.918399	-0.0639588	normal	--	--	Biological Process: negative regulation of transcription from RNA polymerase II promoter (GO:0000122);; Cellular Component: nuclear chromatin (GO:0000790);; Molecular Function: RNA polymerase II core promoter proximal region sequence-specific DNA binding (GO:0000978);; Molecular Function: core promoter sequence-specific DNA binding (GO:0001046);; Molecular Function: transcriptional repressor acti…	K03728|0|oas:100174903|K03728 nuclear receptor subfamily 1 group D member 1 | (RefSeq) NR1D1; nuclear receptor subfamily 1 group D member 1	Circadian rhythm (ko04710)	[T]	Signal transduction mechanisms	Zinc finger, C4 type (two domains);; Ligand-binding domain of nuclear hormone receptor	Nuclear receptor subfamily 1 group D member 1 OS=Ovis aries OX=9940 GN=NR1D1 PE=2 SV=1	K	Transcription	nuclear receptor subfamily 1 group D member 1 [Ovis aries]	biological process: biological regulation (GO:0065007);; cellular component: cell (GO:0005623);; cellular component: membrane-enclosed lumen (GO:0031974);; cellular component: organelle (GO:0043226);; cellular component: organelle part (GO:0044422);; cellular component: cell part (GO:0044464);; molecular function: binding (GO:0005488);; molecular function: nucleic acid binding transcription facto…
gene-PCDH18	4.23244	4.02808	2.88664	2.34911	1.78721	1.64228	1.54105	1.40785	3.32039	3.31959	2.07945	0.222031	-0.553543	normal	0.000651943	-0.936965	down	0.649795	-0.251175	normal	[U]	Intracellular trafficking, secretion, and vesicular transport	Molecular Function: calcium ion binding (GO:0005509);; Cellular Component: plasma membrane (GO:0005886);; Biological Process: homophilic cell adhesion via plasma membrane adhesion molecules (GO:0007156);; Biological Process: brain development (GO:0007420);; Cellular Component: integral component of membrane (GO:0016021);;	K16499|0|oas:101118052|K16499 protocadherin delta 2 | (RefSeq) PCDH18; protocadherin 18	--	[S]	Function unknown	Cadherin domain;; Cadherin-like;; Cadherin-like	Protocadherin-18 OS=Bos taurus OX=9913 GN=PCDH18 PE=2 SV=1	U	Intracellular trafficking, secretion, and vesicular transport	PREDICTED: protocadherin-18 isoform X1 [Ovis aries]	molecular function: binding (GO:0005488);; cellular component: cell (GO:0005623);; cellular component: membrane (GO:0016020);; cellular component: cell part (GO:0044464);; biological process: biological adhesion (GO:0022610);; biological process: multicellular organismal process (GO:0032501);; biological process: developmental process (GO:0032502);; biological process: single-organism process (GO…
gene-PLAU	13.6779	10.8305	10.0913	6.36749	7.02005	4.31475	5.33875	4.48082	7.95077	10.9995	9.54186	0.0838254	-0.571912	normal	9.5e-07	-1.02414	down	0.730372	-0.191545	normal	[O]	Posttranslational modification, protein turnover, chaperones	Biological Process: response to hypoxia (GO:0001666);; Molecular Function: serine-type endopeptidase activity (GO:0004252);; Cellular Component: extracellular space (GO:0005615);; Cellular Component: focal adhesion (GO:0005925);; Biological Process: proteolysis (GO:0006508);; Cellular Component: cell surface (GO:0009986);; Biological Process: regulation of receptor activity (GO:0010469);; Biologi…	K01348|0|oas:100302501|K01348 urokinase plasminogen activator [EC:3.4.21.73] | (RefSeq) PLAU, u-PA; plasminogen activator, urokinase	NF-kappa B signaling pathway (ko04064);; Complement and coagulation cascades (ko04610);; Transcriptional misregulation in cancer (ko05202);; Proteoglycans in cancer (ko05205);; MicroRNAs in cancer (ko05206)	--	--	Trypsin;; Kringle domain	Urokinase-type plasminogen activator OS=Bos taurus OX=9913 GN=PLAU PE=2 SV=1	O	Posttranslational modification, protein turnover, chaperones	urokinase-type plasminogen activator precursor [Ovis aries]	biological process: response to stimulus (GO:0050896);; molecular function: catalytic activity (GO:0003824);; biological process: metabolic process (GO:0008152);; cellular component: extracellular region (GO:0005576);; cellular component: extracellular region part (GO:0044421);; cellular component: cell junction (GO:0030054);; cellular component: cell (GO:0005623);; cellular component: cell part …
PLEKHF1	6.13373	7.01605	6.608	2.7636	3.52508	2.7184	3.26118	2.15563	4.86662	5.01315	3.89377	0.00900342	-0.786271	down	7.9e-05	-0.977846	down	0.273994	-0.40974	normal	--	--	Cellular Component: lysosome (GO:0005764);; Cellular Component: endosome (GO:0005768);; Biological Process: endosome organization (GO:0007032);; Molecular Function: phosphatidylinositol-5-phosphate binding (GO:0010314);; Biological Process: positive regulation of autophagy (GO:0010508);; Molecular Function: phosphatidylinositol-3-phosphate binding (GO:0032266);; Molecular Function: metal ion bind…	--	--	[R]	General function prediction only	FYVE zinc finger;; PH domain	Zinc finger FYVE domain-containing protein 21 OS=Bos taurus OX=9913 GN=ZFYVE21 PE=2 SV=1	S	Function unknown	pleckstrin homology domain-containing family F member 1 isoform X1 [Odocoileus virginianus texanus]	cellular component: cell (GO:0005623);; cellular component: organelle (GO:0043226);; cellular component: cell part (GO:0044464);; biological process: cellular process (GO:0009987);; biological process: cellular component organization or biogenesis (GO:0071840);; molecular function: binding (GO:0005488);; biological process: biological regulation (GO:0065007);; biological process: single-organism …
S1PR3	3.38062	3.04161	1.97307	0.886111	1.21789	1.00226	1.26131	0.836565	1.79605	1.63796	1.62344	0.0168493	-0.897462	down	0.00103675	-1.00664	down	0.209088	-0.533895	normal	--	--	Biological Process: sphingosine-1-phosphate signaling pathway (GO:0003376);; Molecular Function: integrin binding (GO:0005178);; Cellular Component: plasma membrane (GO:0005886);; Biological Process: inflammatory response (GO:0006954);; Biological Process: adenylate cyclase-inhibiting G-protein coupled receptor signaling pathway (GO:0007193);; Biological Process: Notch signaling pathway (GO:00072…	K04290|0|oas:101103373|K04290 sphingosine 1-phosphate receptor 3 | (RefSeq) S1PR3; sphingosine-1-phosphate receptor 3	Sphingolipid signaling pathway (ko04071);; Neuroactive ligand-receptor interaction (ko04080)	--	--	7 transmembrane receptor (rhodopsin family);; Serpentine type 7TM GPCR chemoreceptor Srsx	Sphingosine 1-phosphate receptor 1 OS=Bos taurus OX=9913 GN=S1PR1 PE=2 SV=1	U	Intracellular trafficking, secretion, and vesicular transport	PREDICTED: sphingosine 1-phosphate receptor 3 [Ovis aries]	biological process: cellular process (GO:0009987);; biological process: signaling (GO:0023052);; biological process: single-organism process (GO:0044699);; biological process: response to stimulus (GO:0050896);; biological process: biological regulation (GO:0065007);; molecular function: binding (GO:0005488);; cellular component: cell (GO:0005623);; cellular component: membrane (GO:0016020);; cel…
gene-SLC2A3	17.3213	10.9746	15.9545	7.63587	3.02223	7.2123	5.98257	1.95395	9.49615	17.0584	7.90827	0.0549029	-0.827531	normal	0.0291551	-0.87644	down	0.735509	-0.220871	normal	[G]	Carbohydrate transport and metabolism	Cellular Component: acrosomal membrane (GO:0002080);; Molecular Function: glucose binding (GO:0005536);; Cellular Component: integral component of plasma membrane (GO:0005887);; Molecular Function: dehydroascorbic acid transporter activity (GO:0033300);; Molecular Function: D-glucose transmembrane transporter activity (GO:0055056);; Biological Process: dehydroascorbic acid transport (GO:0070837);…	K08142|0|oas:443308|K08142 MFS transporter, SP family, solute carrier family 2 (facilitated glucose transporter), member 3 | (RefSeq) SLC2A3, GLUT-3; solute carrier family 2 (facilitated glucose transporter), member 3	--	[G]	Carbohydrate transport and metabolism	Sugar (and other) transporter;; Major Facilitator Superfamily	Solute carrier family 2, facilitated glucose transporter member 3 OS=Ovis aries OX=9940 GN=SLC2A3 PE=2 SV=1	G	Carbohydrate transport and metabolism	solute carrier family 2, facilitated glucose transporter member 3 [Ovis aries]	cellular component: cell (GO:0005623);; cellular component: membrane (GO:0016020);; cellular component: organelle (GO:0043226);; cellular component: organelle part (GO:0044422);; cellular component: cell part (GO:0044464);; molecular function: binding (GO:0005488);; cellular component: membrane part (GO:0044425);; molecular function: transporter activity (GO:0005215);; biological process: single-…
gene-SNAI3	3.16058	2.17021	4.75043	1.86897	1.12803	0.400747	1.36162	0.896644	2.75887	1.77052	2.82886	0.202514	-0.641386	normal	0.00114024	-1.13757	down	0.637631	-0.282795	normal	--	--	Biological Process: negative regulation of transcription from RNA polymerase II promoter (GO:0000122);; Molecular Function: RNA polymerase II core promoter proximal region sequence-specific DNA binding (GO:0000978);; Molecular Function: transcription factor activity, RNA polymerase II core promoter proximal region sequence-specific binding (GO:0000982);; Molecular Function: transcriptional repres…	K09217|0|chx:102188886|K09217 snail 3 | (RefSeq) SNAI3; snail family transcriptional repressor 3	--	[K]	Transcription	Zinc finger, C2H2 type;; C2H2-type zinc finger;; Zinc-finger double domain;; Zinc-finger double-stranded RNA-binding;; Zinc-finger of C2H2 type	Zinc finger protein SNAI2 OS=Bos taurus OX=9913 GN=SNAI2 PE=2 SV=1	S	Function unknown	PREDICTED: zinc finger protein SNAI3 [Capra hircus]	biological process: biological regulation (GO:0065007);; molecular function: binding (GO:0005488);; molecular function: nucleic acid binding transcription factor activity (GO:0001071);; cellular component: cell (GO:0005623);; cellular component: organelle (GO:0043226);; cellular component: cell part (GO:0044464);; cellular component: macromolecular complex (GO:0032991)
gene-TBXA2R	3.56275	2.32454	2.58598	0.758043	1.59948	1.22029	1.06968	1.02967	1.84871	2.11892	1.57087	0.129443	-0.718007	normal	0.00212946	-0.952476	down	0.355013	-0.42552	normal	--	--	Molecular Function: thromboxane receptor activity (GO:0004960);; Cellular Component: intracellular (GO:0005622);; Cellular Component: plasma membrane (GO:0005886);; Biological Process: inflammatory response (GO:0006954);; Biological Process: G-protein coupled receptor signaling pathway (GO:0007186);; Cellular Component: integral component of membrane (GO:0016021);; Biological Process: regulation …	K04264|0|phd:102316468|K04264 thromboxane A2 receptor | (RefSeq) TBXA2R; thromboxane A2 receptor	Calcium signaling pathway (ko04020);; Neuroactive ligand-receptor interaction (ko04080);; Platelet activation (ko04611)	[R]	General function prediction only	7 transmembrane receptor (rhodopsin family);; Serpentine type 7TM GPCR chemoreceptor Srv	Thromboxane A2 receptor OS=Bos taurus OX=9913 GN=TBXA2R PE=2 SV=2	U	Intracellular trafficking, secretion, and vesicular transport	TBXA2R [Cervus elaphus hippelaphus]	molecular function: signal transducer activity (GO:0004871);; molecular function: molecular transducer activity (GO:0060089);; biological process: cellular process (GO:0009987);; biological process: signaling (GO:0023052);; biological process: single-organism process (GO:0044699);; biological process: response to stimulus (GO:0050896);; biological process: biological regulation (GO:0065007);; cel…
ZFP36L1	60.7008	55.6757	64.0413	35.327	28.8923	35.1238	33.8737	28.5726	45.7186	46.5706	37.7397	0.00124495	-0.707559	down	0.00103675	-0.676041	down	0.133952	-0.395649	normal	--	--	Biological Process: nuclear-transcribed mRNA catabolic process, deadenylation-dependent decay (GO:0000288);; Biological Process: vasculogenesis (GO:0001570);; Biological Process: proepicardium development (GO:0003342);; Molecular Function: mRNA binding (GO:0003729);; Cellular Component: nucleus (GO:0005634);; Cellular Component: cytoplasm (GO:0005737);; Biological Process: regulation of translati…	K18753|0|bom:102287358|K18753 butyrate response factor 1 | (RefSeq) ZFP36L1; ZFP36 ring finger protein like 1	--	[R]	General function prediction only	Tis11B like protein, N terminus;; Zinc finger C-x8-C-x5-C-x3-H type (and similar)	mRNA decay activator protein ZFP36 OS=Bos taurus OX=9913 GN=ZFP36 PE=2 SV=1	S	Function unknown	PREDICTED: zinc finger protein 36, C3H1 type-like 1 [Bos mutus]	biological process: metabolic process (GO:0008152);; biological process: cellular process (GO:0009987);; biological process: biological regulation (GO:0065007);; biological process: developmental process (GO:0032502);; biological process: single-organism process (GO:0044699);; biological process: multicellular organismal process (GO:0032501);; molecular function: binding (GO:0005488);; cellular c…
ZMAT4	0.874687	0.974131	0.903285	0	0	0	0.017448	0	0.064198	2.82936	0	3.81e-12	-2.03808	down	3.25e-15	-2.33888	down	0.989454	0.00693152	normal	--	--	Molecular Function: p53 binding (GO:0002039);; Molecular Function: DNA binding (GO:0003677);; Molecular Function: RNA binding (GO:0003723);; Cellular Component: nucleus (GO:0005634);; Molecular Function: zinc ion binding (GO:0008270);; Biological Process: intrinsic apoptotic signaling pathway by p53 class mediator (GO:0072332);;	--	--	--	--	Zinc-finger of C2H2 type;; Zinc-finger double-stranded RNA-binding;; C2H2 type zinc-finger (2 copies);; U1 zinc finger	Zinc finger matrin-type protein 4 OS=Bos taurus OX=9913 GN=ZMAT4 PE=2 SV=1	S	Function unknown	PREDICTED: zinc finger matrin-type protein 4 isoform X3 [Ovis aries]	molecular function: binding (GO:0005488);; cellular component: cell (GO:0005623);; cellular component: organelle (GO:0043226);; cellular component: cell part (GO:0044464);; biological process: cellular process (GO:0009987);; biological process: signaling (GO:0023052);; biological process: single-organism process (GO:0044699);; biological process: response to stimulus (GO:0050896);; biological pro…

## Sheet: cluster3
#ID
Ovis_aries_newGene_22156	0.551606	0.124931	0.875742	2.01392	0.88873	1.2681	4.31923	1.80402	0.176631	0.403568	0.641182	0.17325	0.665142	normal	0.000237145	1.28265	up	0.941557	-0.070717	normal	--	--	Molecular Function: actin binding (GO:0003779);; Molecular Function: phospholipid binding (GO:0005543);; Biological Process: metabolic process (GO:0008152);; Molecular Function: transferase activity (GO:0016740);;	K11433|1.94196e-33|pps:106635114|K11433 histone-lysine N-methyltransferase SETMAR [EC:2.1.1.43] | (RefSeq) histone-lysine N-methyltransferase SETMAR	Lysine degradation (ko00310)	--	--	--	Serine/threonine-protein phosphatase 2A 55 kDa regulatory subunit B beta isoform OS=Pongo abelii OX=9601 GN=PPP2R2B PE=2 SV=1	--	--	PREDICTED: histone-lysine N-methyltransferase SETMAR [Rhinolophus sinicus]	molecular function: binding (GO:0005488);; biological process: metabolic process (GO:0008152);; molecular function: catalytic activity (GO:0003824)
Ovis_aries_newGene_2385	2.81075	1.80765	1.76616	3.10887	2.231	5.54346	2.49423	7.05317	1.80124	1.92743	1.29969	0.688767	0.296813	normal	0.0465166	0.842939	up	0.763856	-0.209339	normal	--	--	--	K02633|4.74532e-25|phd:102336840|K02633 period circadian protein | (RefSeq) PER2; period circadian clock 2	Circadian rhythm (ko04710);; Circadian entrainment (ko04713);; Herpes simplex infection (ko05168)	--	--	--	--	--	--	PREDICTED: LOW QUALITY PROTEIN: period circadian protein homolog 2 [Pantholops hodgsonii]	--
Ovis_aries_newGene_9826	0.296214	0.103581	0.199419	1.17612	0.365799	2.24745	0.864612	5.37344	0.287755	0.53284	0.346014	0.0879568	0.771326	normal	9.5e-07	1.59262	up	0.417721	0.457399	normal	--	--	Molecular Function: nucleic acid binding (GO:0003676);; Molecular Function: RNA-directed DNA polymerase activity (GO:0003964);; Molecular Function: phospholipid binding (GO:0005543);; Cellular Component: intracellular (GO:0005622);; Cellular Component: fascia adherens (GO:0005916);; Biological Process: RNA-dependent DNA biosynthetic process (GO:0006278);; Biological Process: regulation of transcr…	--	--	--	--	--	--	S	Function unknown	reverse transcriptase-like [Bos taurus]	molecular function: binding (GO:0005488);; molecular function: catalytic activity (GO:0003824);; biological process: metabolic process (GO:0008152);; biological process: cellular process (GO:0009987);; cellular component: cell (GO:0005623);; cellular component: cell part (GO:0044464);; cellular component: cell junction (GO:0030054);; biological process: biological regulation (GO:0065007);; biolog…
gene-ARID5B	7.87854	7.29107	14.9997	15.8639	9.7332	48.975	44.0407	39.7577	3.4175	7.1416	11.7606	0.643117	0.324614	normal	4.61e-13	1.79209	up	0.78421	-0.207198	normal	--	--	Biological Process: negative regulation of transcription from RNA polymerase II promoter (GO:0000122);; Molecular Function: RNA polymerase II regulatory region sequence-specific DNA binding (GO:0000977);; Molecular Function: transcriptional repressor activity, RNA polymerase II transcription regulatory region sequence-specific binding (GO:0001227);; Biological Process: kidney development (GO:0001…	--	--	[K]	Transcription	ARID/BRIGHT DNA binding domain	AT-rich interactive domain-containing protein 5B OS=Bos taurus OX=9913 GN=ARID5B PE=3 SV=1	K	Transcription	PREDICTED: AT-rich interactive domain-containing protein 5B isoform X1 [Capra hircus]	biological process: biological regulation (GO:0065007);; molecular function: binding (GO:0005488);; molecular function: nucleic acid binding transcription factor activity (GO:0001071);; biological process: multicellular organismal process (GO:0032501);; biological process: developmental process (GO:0032502);; biological process: single-organism process (GO:0044699);; molecular function: transcrip…
gene-ARRDC2	73.717	42.4792	73.4304	83.1997	66.5524	179.553	149.632	111.544	77.3542	95.2621	46.6022	0.616629	0.2959	normal	7.9e-05	1.09506	up	0.77011	0.192917	normal	--	--	Cellular Component: plasma membrane (GO:0005886);; Biological Process: signal transduction (GO:0007165);; Cellular Component: cytoplasmic vesicle (GO:0031410);;	--	--	[R]	General function prediction only	Arrestin (or S-antigen), N-terminal domain;; Arrestin (or S-antigen), C-terminal domain	Arrestin domain-containing protein 3 OS=Pongo abelii OX=9601 GN=ARRDC3 PE=2 SV=1	S	Function unknown	PREDICTED: arrestin domain-containing protein 2 isoform X2 [Ovis aries musimon]	cellular component: cell (GO:0005623);; cellular component: membrane (GO:0016020);; cellular component: cell part (GO:0044464);; biological process: cellular process (GO:0009987);; biological process: biological regulation (GO:0065007);; cellular component: organelle (GO:0043226)
gene-CCDC71L	1.5731	1.0767	1.12876	0.971599	1.94445	3.02141	7.32807	4.40574	0.959212	0.977188	1.47349	0.889644	0.150109	normal	2.83e-05	1.34433	up	0.96223	-0.0471162	normal	--	--	--	--	--	--	--	Coiled-coil domain-containing protein 71L	Coiled-coil domain-containing protein 71 OS=Bos taurus OX=9913 GN=CCDC71 PE=2 SV=1	S	Function unknown	PREDICTED: coiled-coil domain-containing protein 71L [Capra hircus]	--
gene-CEBPB	20.0288	19.3662	26.8398	38.312	34.1062	31.3984	47.5947	60.6935	11.8924	18.6427	26.3794	0.00801296	0.720242	up	0.000423202	0.98348	up	0.889358	-0.110056	normal	--	--	Cellular Component: condensed chromosome, centromeric region (GO:0000779);; Cellular Component: nuclear chromatin (GO:0000790);; Molecular Function: RNA polymerase II regulatory region sequence-specific DNA binding (GO:0000977);; Molecular Function: transcriptional activator activity, RNA polymerase II core promoter proximal region sequence-specific binding (GO:0001077);; Biological Process: ovar…	K10048|6.21792e-129|bta:338319|K10048 CCAAT/enhancer binding protein (C/EBP), beta | (RefSeq) CEBPB; CCAAT/enhancer binding protein (C/EBP), beta	TNF signaling pathway (ko04668);; Tuberculosis (ko05152);; Transcriptional misregulation in cancer (ko05202)	[K]	Transcription	Basic region leucine zipper	CCAAT/enhancer-binding protein beta OS=Bos taurus OX=9913 GN=CEBPB PE=3 SV=1	S	Function unknown	PREDICTED: CCAAT/enhancer-binding protein beta [Odobenus rosmarus divergens]	cellular component: cell (GO:0005623);; cellular component: organelle (GO:0043226);; cellular component: organelle part (GO:0044422);; cellular component: cell part (GO:0044464);; cellular component: membrane-enclosed lumen (GO:0031974);; molecular function: binding (GO:0005488);; molecular function: nucleic acid binding transcription factor activity (GO:0001071);; biological process: metabolic p…
gene-CREB5	1.59758	1.3208	1.91991	2.49467	1.88341	4.19983	4.09286	2.92985	1.21373	1.00823	1.88278	0.371014	0.427108	normal	8.23e-06	1.11847	up	0.794442	-0.181306	normal	--	--	Molecular Function: transcription factor activity, sequence-specific DNA binding (GO:0003700);; Molecular Function: sequence-specific DNA binding (GO:0043565);; Biological Process: positive regulation of transcription, DNA-templated (GO:0045893);; Cellular Component: extracellular exosome (GO:0070062);;	K09047|6.0781e-73|phd:102314966|K09047 cyclic AMP-responsive element-binding protein 5 | (RefSeq) CREB5; cAMP responsive element binding protein 5	cGMP-PKG signaling pathway (ko04022);; cAMP signaling pathway (ko04024);; PI3K-Akt signaling pathway (ko04151);; AMPK signaling pathway (ko04152);; Longevity regulating pathway (ko04211);; Adrenergic signaling in cardiomyocytes (ko04261);; TNF signaling pathway (ko04668);; Cholinergic synapse (ko04725);; Dopaminergic synapse (ko04728);; Insulin secretion (ko04911);; Estrogen signaling pathway (ko…	[K]	Transcription	bZIP transcription factor;; Basic region leucine zipper;; bZIP Maf transcription factor	Cyclic AMP-dependent transcription factor ATF-7 OS=Pongo abelii OX=9601 GN=ATF7 PE=2 SV=1	K	Transcription	PREDICTED: cyclic AMP-responsive element-binding protein 5 isoform X3 [Ailuropoda melanoleuca]	molecular function: nucleic acid binding transcription factor activity (GO:0001071);; biological process: biological regulation (GO:0065007);; molecular function: binding (GO:0005488);; cellular component: extracellular region (GO:0005576);; cellular component: organelle (GO:0043226);; cellular component: extracellular region part (GO:0044421)
gene-FAH	2.12062	1.60812	1.45226	1.53309	2.23647	7.82839	4.33948	4.20055	1.38466	3.01183	1.51	0.890847	0.143185	normal	0.000220307	1.21376	up	0.86793	0.139695	normal	[Q]	Secondary metabolites biosynthesis, transport and catabolism	Molecular Function: DNA binding (GO:0003677);; Molecular Function: fumarylacetoacetase activity (GO:0004334);; Biological Process: arginine catabolic process (GO:0006527);; Biological Process: L-phenylalanine catabolic process (GO:0006559);; Biological Process: tyrosine catabolic process (GO:0006572);; Molecular Function: zinc ion binding (GO:0008270);; Cellular Component: extracellular exosome (…	K01555|0|chx:102173786|K01555 fumarylacetoacetase [EC:3.7.1.2] | (RefSeq) FAH; fumarylacetoacetate hydrolase	Tyrosine metabolism (ko00350)	[G]	Carbohydrate transport and metabolism	Fumarylacetoacetate (FAA) hydrolase family;; Fumarylacetoacetase N-terminal	Fumarylacetoacetase OS=Bos taurus OX=9913 GN=FAH PE=2 SV=1	Q	Secondary metabolites biosynthesis, transport and catabolism	Fumarylacetoacetase, partial [Bos mutus]	molecular function: binding (GO:0005488);; molecular function: catalytic activity (GO:0003824);; biological process: metabolic process (GO:0008152);; biological process: cellular process (GO:0009987);; biological process: single-organism process (GO:0044699);; cellular component: extracellular region (GO:0005576);; cellular component: organelle (GO:0043226);; cellular component: extracellular reg…
gene-FOSL2	7.95574	3.84719	13.0118	17.545	13.4734	16.1837	19.1164	22.5639	5.2188	8.68059	13.3848	0.226114	0.634968	normal	0.00761876	0.95548	up	0.874935	0.132602	normal	--	--	Molecular Function: RNA polymerase II core promoter proximal region sequence-specific DNA binding (GO:0000978);; Molecular Function: transcription factor activity, RNA polymerase II core promoter proximal region sequence-specific binding (GO:0000982);; Biological Process: keratinocyte development (GO:0003334);; Molecular Function: chromatin binding (GO:0003682);; Cellular Component: nucleoplasm (…	K09030|1.53611e-113|phd:102322830|K09030 fos-like antigen 2 | (RefSeq) FOSL2; FOS like 2, AP-1 transcription factor subunit	Osteoclast differentiation (ko04380)	[K]	Transcription	bZIP transcription factor;; Basic region leucine zipper;; bZIP Maf transcription factor	Proto-oncogene c-Fos OS=Felis catus OX=9685 GN=FOS PE=2 SV=1	K	Transcription	fos-related antigen 2 isoform X1 [Odocoileus virginianus texanus]	molecular function: binding (GO:0005488);; molecular function: nucleic acid binding transcription factor activity (GO:0001071);; biological process: biological regulation (GO:0065007);; biological process: cellular process (GO:0009987);; biological process: developmental process (GO:0032502);; biological process: single-organism process (GO:0044699);; cellular component: cell (GO:0005623);; cellu…
gene-KIAA0408	8.82438	8.25191	9.46599	14.1607	9.30353	18.0541	12.5256	26.1952	6.42669	8.80921	10.22	0.343568	0.429822	normal	0.00332837	0.951373	up	0.994817	-0.00466027	normal	--	--	--	--	--	--	--	Domain of unknown function (DUF4482)	--	S	Function unknown	PREDICTED: uncharacterized protein KIAA0408 homolog [Ovis aries]	--
gene-LOC114109642	4.23046	3.83643	1.24906	2.73236	4.62776	6.16448	21.3298	6.82834	2.22348	5.63877	4.6353	0.875218	0.166881	normal	0.00958291	1.01399	up	0.743041	0.241551	normal	--	--	Biological Process: antigen processing and presentation of peptide antigen via MHC class I (GO:0002474);; Biological Process: immune response (GO:0006955);; Cellular Component: integral component of membrane (GO:0016021);; Molecular Function: peptide antigen binding (GO:0042605);; Cellular Component: MHC class I protein complex (GO:0042612);;	K06751|6.97084e-179|bta:782684|K06751 major histocompatibility complex, class I | (RefSeq) BOLA-A; major histocompatibility complex, class I, A	Endocytosis (ko04144);; Phagosome (ko04145);; Cell adhesion molecules (CAMs) (ko04514);; Antigen processing and presentation (ko04612);; Type I diabetes mellitus (ko04940);; HTLV-I infection (ko05166);; Herpes simplex infection (ko05168);; Epstein-Barr virus infection (ko05169);; Viral carcinogenesis (ko05203);; Autoimmune thyroid disease (ko05320);; Allograft rejection (ko05330);; Graft-versus-h…	--	--	Class I Histocompatibility antigen, domains alpha 1 and 2;; Immunoglobulin C1-set domain;; CD80-like C2-set immunoglobulin domain	BOLA class I histocompatibility antigen, alpha chain BL3-6 OS=Bos taurus OX=9913 PE=2 SV=1	U	Intracellular trafficking, secretion, and vesicular transport	PREDICTED: BOLA class I histocompatibility antigen, alpha chain BL3-7 isoform X4 [Ovis aries musimon]	biological process: immune system process (GO:0002376);; biological process: response to stimulus (GO:0050896);; cellular component: membrane (GO:0016020);; cellular component: membrane part (GO:0044425);; molecular function: binding (GO:0005488);; cellular component: cell (GO:0005623);; cellular component: macromolecular complex (GO:0032991);; cellular component: cell part (GO:0044464)
gene-LOC114112279	13.3405	11.5613	15.0247	22.3434	23.0109	12.8387	29.7543	37.9103	14.3812	10.675	2.1807	4.59e-06	0.815606	up	0.0250804	0.825009	up	0.815789	-0.17457	normal	--	--	--	--	--	--	--	Immunoglobulin I-set domain;; Immunoglobulin domain;; Immunoglobulin domain;; Immunoglobulin domain;; Immunoglobulin V-set domain;; Ig-like domain on T-cell surface glycoprotein CD3 epsilon chain;; T-cell surface glycoprotein CD3 delta chain;; Izumo-like Immunoglobulin domain;; Multiubiquitin;; Ribosome recycling factor;; Actin-binding domain of plant-specific actin-binding protein;; NTF2 fold im…	Sialoadhesin OS=Sus scrofa OX=9823 GN=SIGLEC1 PE=1 SV=1	S	Function unknown	PREDICTED: obscurin isoform X34 [Capra hircus]	--
gene-OTUD1	3.98334	6.02278	4.47729	27.3662	4.6034	25.7485	30.5199	106.954	8.17655	17.2062	11.3214	0.371014	0.450572	normal	0.00106592	1.13864	up	0.00549105	0.966808	up	--	--	Molecular Function: thiol-dependent ubiquitin-specific protease activity (GO:0004843);; Biological Process: protein K63-linked deubiquitination (GO:0070536);;	K13716|0|bta:104968459|K13716 OTU domain-containing protein 1 [EC:3.4.19.12] | (RefSeq) OTUD1; OTU deubiquitinase 1	--	[TO]	Signal transduction mechanisms;; Posttranslational modification, protein turnover, chaperones	OTU-like cysteine protease	--	O	Posttranslational modification, protein turnover, chaperones	OTU domain-containing protein 1 [Odocoileus virginianus texanus]	molecular function: catalytic activity (GO:0003824);; biological process: metabolic process (GO:0008152);; biological process: cellular process (GO:0009987)
gene-PER1	20.8644	10.0734	24.3524	22.6338	19.3933	42.7649	32.9827	45.954	16.8023	15.9708	12.3925	0.783952	0.22712	normal	0.0032309	0.971869	up	0.793448	-0.177261	normal	--	--	Biological Process: negative regulation of transcription from RNA polymerase II promoter (GO:0000122);; Molecular Function: RNA polymerase II core promoter proximal region sequence-specific DNA binding (GO:0000978);; Molecular Function: transcription factor activity, transcription factor binding (GO:0000989);; Biological Process: regulation of sodium ion transport (GO:0002028);; Cellular Componen…	K02633|0|bta:516318|K02633 period circadian protein | (RefSeq) PER1, Rigui-like; period circadian clock 1	Circadian rhythm (ko04710);; Circadian entrainment (ko04713);; Herpes simplex infection (ko05168)	[T]	Signal transduction mechanisms	Period protein 2/3C-terminal region;; PAS fold;; PAS domain;; PAS fold	Aryl hydrocarbon receptor nuclear translocator-like protein 1 OS=Pongo abelii OX=9601 GN=ARNTL PE=2 SV=1	K	Transcription	PREDICTED: period circadian protein homolog 1 isoform X2 [Ovis aries musimon]	biological process: biological regulation (GO:0065007);; molecular function: binding (GO:0005488);; molecular function: transcription factor activity, protein binding (GO:0000988);; cellular component: cell (GO:0005623);; cellular component: organelle (GO:0043226);; cellular component: cell part (GO:0044464);; biological process: multicellular organismal process (GO:0032501);; biological process:…
gene-PER2	3.04756	2.05719	2.39978	3.54868	2.26074	7.49523	3.36963	6.63425	1.86878	1.60407	1.40384	0.727264	0.25299	normal	0.00684785	0.967525	up	0.216963	-0.478537	normal	--	--	--	K02633|0|chx:102178971|K02633 period circadian protein | (RefSeq) PER2; period circadian clock 2	Circadian rhythm (ko04710);; Circadian entrainment (ko04713);; Herpes simplex infection (ko05168)	[T]	Signal transduction mechanisms	Period protein 2/3C-terminal region;; PAS fold;; PAS domain;; PAS fold	Aryl hydrocarbon receptor nuclear translocator-like protein 1 OS=Equus caballus OX=9796 GN=ARNTL PE=2 SV=1	K	Transcription	PREDICTED: period circadian protein homolog 2 isoform X2 [Ovis aries musimon]	--
gene-PFKFB3	83.6033	105.245	139.866	347.846	144.184	352.901	167.845	358.469	36.5091	65.9712	144.37	0.0518362	0.83141	normal	0.000651943	1.12026	up	0.880763	-0.124449	normal	[E]	Amino acid transport and metabolism	Molecular Function: 6-phosphofructo-2-kinase activity (GO:0003873);; Molecular Function: fructose-2,6-bisphosphate 2-phosphatase activity (GO:0004331);; Molecular Function: ATP binding (GO:0005524);; Cellular Component: nucleoplasm (GO:0005654);; Biological Process: fructose metabolic process (GO:0006000);; Biological Process: fructose 2,6-bisphosphate metabolic process (GO:0006003);; Biological …	K01103|0|bta:407183|K01103 6-phosphofructo-2-kinase / fructose-2,6-biphosphatase 3&#160; [EC:2.7.1.105 3.1.3.46] | (RefSeq) PFKFB3; 6-phosphofructo-2-kinase/fructose-2,6-biphosphatase 3	Fructose and mannose metabolism (ko00051);; HIF-1 signaling pathway (ko04066);; AMPK signaling pathway (ko04152)	[G]	Carbohydrate transport and metabolism	6-phosphofructo-2-kinase;; Histidine phosphatase superfamily (branch 1);; AAA domain;; Chromatin associated protein KTI12	6-phosphofructo-2-kinase/fructose-2,6-bisphosphatase 3 OS=Pongo abelii OX=9601 GN=PFKFB3 PE=2 SV=2	G	Carbohydrate transport and metabolism	PREDICTED: 6-phosphofructo-2-kinase/fructose-2,6-bisphosphatase 3 isoform X8 [Capra hircus]	molecular function: catalytic activity (GO:0003824);; biological process: metabolic process (GO:0008152);; biological process: cellular process (GO:0009987);; molecular function: binding (GO:0005488);; cellular component: cell (GO:0005623);; cellular component: organelle (GO:0043226);; cellular component: organelle part (GO:0044422);; cellular component: cell part (GO:0044464);; biological proces…
gene-RASD1	60.5543	16.2483	60.5144	111.605	72.2237	165.039	126.617	114.501	27.44	70.1152	66.1181	0.530942	0.397723	normal	0.00242846	1.08972	up	0.889059	0.115475	normal	--	--	Molecular Function: GTP binding (GO:0005525);; Biological Process: small GTPase mediated signal transduction (GO:0007264);; Cellular Component: membrane (GO:0016020);; Cellular Component: sarcoplasmic reticulum (GO:0016529);;	K07843|0|phd:102343378|K07843 RAS, dexamethasone-induced Ras-related protein 1 | (RefSeq) RASD1; ras related dexamethasone induced 1	Circadian entrainment (ko04713)	[R]	General function prediction only	Ras family;; Ras of Complex, Roc, domain of DAPkinase;; ADP-ribosylation factor family	GTP-binding protein Di-Ras2 OS=Pongo abelii OX=9601 GN=DIRAS2 PE=2 SV=1	S	Function unknown	PREDICTED: dexamethasone-induced Ras-related protein 1 [Pantholops hodgsonii]	molecular function: binding (GO:0005488);; biological process: cellular process (GO:0009987);; biological process: signaling (GO:0023052);; biological process: single-organism process (GO:0044699);; biological process: response to stimulus (GO:0050896);; biological process: biological regulation (GO:0065007);; cellular component: membrane (GO:0016020);; cellular component: cell (GO:0005623);; cel…
gene-RORC	7.97007	8.08687	9.26122	10.7674	9.17034	23.7337	11.9009	13.4439	3.11332	8.43739	6.20996	0.467359	0.30123	normal	0.0230067	0.825113	up	0.612565	-0.307758	normal	--	--	Molecular Function: steroid hormone receptor activity (GO:0003707);; Molecular Function: RNA polymerase II transcription factor activity, ligand-activated sequence-specific DNA binding (GO:0004879);; Cellular Component: nucleolus (GO:0005730);; Biological Process: regulation of transcription, DNA-templated (GO:0006355);; Molecular Function: oxysterol binding (GO:0008142);; Molecular Function: zin…	K08534|0|chx:100860876|K08534 RAR-related orphan receptor gamma | (RefSeq) RORC; RAR related orphan receptor C	Circadian rhythm (ko04710);; Inflammatory bowel disease (IBD) (ko05321)	[K]	Transcription	Ligand-binding domain of nuclear hormone receptor	Nuclear receptor ROR-gamma OS=Pongo abelii OX=9601 GN=RORC PE=2 SV=1	S	Function unknown	PREDICTED: nuclear receptor ROR-gamma isoform X1 [Ovis aries musimon]	molecular function: signal transducer activity (GO:0004871);; molecular function: molecular transducer activity (GO:0060089);; biological process: cellular process (GO:0009987);; biological process: signaling (GO:0023052);; biological process: single-organism process (GO:0044699);; biological process: response to stimulus (GO:0050896);; biological process: biological regulation (GO:0065007);; mol…
gene-SERPINE1	0.958583	0.760562	0.378592	3.18408	1.05984	4.56724	2.56302	2.29805	0.498839	0.384097	2.48534	0.188124	0.660735	normal	0.000423186	1.24741	up	0.747322	0.217054	normal	[O]	Posttranslational modification, protein turnover, chaperones	Biological Process: chronological cell aging (GO:0001300);; Molecular Function: protease binding (GO:0002020);; Molecular Function: serine-type endopeptidase inhibitor activity (GO:0004867);; Molecular Function: receptor binding (GO:0005102);; Cellular Component: extracellular space (GO:0005615);; Biological Process: regulation of receptor activity (GO:0010469);; Biological Process: negative regu…	K03982|0|chx:102169375|K03982 plasminogen activator inhibitor 1 | (RefSeq) SERPINE1; serpin family E member 1	HIF-1 signaling pathway (ko04066);; p53 signaling pathway (ko04115);; Hippo signaling pathway (ko04390);; Complement and coagulation cascades (ko04610);; AGE-RAGE signaling pathway in diabetic complications (ko04933);; Chagas disease (American trypanosomiasis) (ko05142)	[V]	Defense mechanisms	Serpin (serine protease inhibitor)	Plasminogen activator inhibitor 1 OS=Bos taurus OX=9913 GN=SERPINE1 PE=1 SV=1	O	Posttranslational modification, protein turnover, chaperones	PREDICTED: plasminogen activator inhibitor 1 isoform X1 [Ovis aries]	biological process: cellular process (GO:0009987);; biological process: developmental process (GO:0032502);; biological process: single-organism process (GO:0044699);; molecular function: binding (GO:0005488);; molecular function: molecular function regulator (GO:0098772);; biological process: biological regulation (GO:0065007);; cellular component: extracellular region (GO:0005576);; cellular co…
gene-TRIM63	152.996	72.9304	210.99	223.48	153.542	349.09	310.514	309.235	113.65	101.41	161.032	0.647915	0.329211	normal	0.00403823	0.965327	up	0.904462	-0.100714	normal	--	--	Cellular Component: cytoplasm (GO:0005737);; Molecular Function: zinc ion binding (GO:0008270);; Molecular Function: cation transmembrane transporter activity (GO:0008324);; Cellular Component: integral component of membrane (GO:0016021);; Molecular Function: ligase activity (GO:0016874);; Molecular Function: titin binding (GO:0031432);; Biological Process: cation transmembrane transport (GO:0098…	K10655|0|oas:101113132|K10655 tripartite motif-containing protein 63 [EC:2.3.2.27] | (RefSeq) TRIM63; tripartite motif containing 63	--	[O]	Posttranslational modification, protein turnover, chaperones	RING-type zinc-finger;; Zinc finger, C3HC4 type (RING finger);; Zinc finger, C3HC4 type (RING finger);; zinc-RING finger domain;; B-box zinc finger;; Ring finger domain	Tripartite motif-containing protein 54 OS=Bos taurus OX=9913 GN=TRIM54 PE=2 SV=1	O	Posttranslational modification, protein turnover, chaperones	PREDICTED: E3 ubiquitin-protein ligase TRIM63 isoform X1 [Ovis aries]	cellular component: cell (GO:0005623);; cellular component: cell part (GO:0044464);; molecular function: binding (GO:0005488);; molecular function: transporter activity (GO:0005215);; biological process: localization (GO:0051179);; cellular component: membrane (GO:0016020);; cellular component: membrane part (GO:0044425);; molecular function: catalytic activity (GO:0003824)

## Sheet: cluster4
#ID
Ovis_aries_newGene_16771	3.38676	2.16958	3.28475	0.773323	1.35249	2.48192	2.96673	2.27181	2.19452	2.1678	1.49779	0.0083943	-0.944665	down	0.955148	-0.0461518	normal	0.318889	-0.431952	normal	--	--	Cellular Component: extracellular space (GO:0005615);; Cellular Component: nucleolus (GO:0005730);; Cellular Component: cytoplasm (GO:0005737);; Biological Process: rRNA processing (GO:0006364);; Biological Process: nervous system development (GO:0007399);; Cellular Component: small-subunit processome (GO:0032040);; Biological Process: ribosomal small subunit biogenesis (GO:0042274);; Biological …	K14769|1.33057e-58|phd:102330248|K14769 U3 small nucleolar RNA-associated protein 11 | (RefSeq) UTP11, UTP11L; UTP11, small subunit processome component homolog (S. cerevisiae)	--	[S]	Function unknown	Utp11 protein	--	S	Function unknown	PREDICTED: probable U3 small nucleolar RNA-associated protein 11 [Pantholops hodgsonii]	cellular component: extracellular region (GO:0005576);; cellular component: extracellular region part (GO:0044421);; cellular component: cell (GO:0005623);; cellular component: organelle (GO:0043226);; cellular component: organelle part (GO:0044422);; cellular component: cell part (GO:0044464);; biological process: metabolic process (GO:0008152);; biological process: cellular process (GO:0009987)…
Ovis_aries_newGene_19259	8.46921	11.0326	10.0068	4.80104	4.186	4.49666	12.6124	4.23714	6.47647	4.25838	4.64623	0.15491	-0.575272	normal	0.689811	Ovis_aries_newGene_26572	normal	0.00714564	-0.641377	down	--	--	Molecular Function: receptor binding (GO:0005102);; Cellular Component: nucleus (GO:0005634);; Cellular Component: peroxisome (GO:0005777);; Molecular Function: cAMP response element binding protein binding (GO:0008140);; Biological Process: putrescine biosynthetic process (GO:0009446);; Biological Process: putrescine catabolic process (GO:0009447);; Biological Process: positive regulation of CRE…	--	--	--	--	--	--	S	Function unknown	PREDICTED: uncharacterized protein LOC109575307 isoform X2 [Bos indicus]	molecular function: binding (GO:0005488);; cellular component: cell (GO:0005623);; cellular component: organelle (GO:0043226);; cellular component: cell part (GO:0044464);; biological process: metabolic process (GO:0008152);; biological process: cellular process (GO:0009987);; biological process: biological regulation (GO:0065007);; molecular function: catalytic activity (GO:0003824);; biological…
Ovis_aries_newGene_22653	13.7426	9.66112	9.98686	3.74217	3.86471	8.61652	8.46082	7.67644	2.33308	5.70863	5.53542	0.101423	-0.767931	normal	0.0465166	-0.683153	down	1.75e-06	-1.31087	down	--	--	Molecular Function: protein serine/threonine kinase activity (GO:0004674);; Molecular Function: ATP binding (GO:0005524);; Cellular Component: nucleoplasm (GO:0005654);; Biological Process: protein phosphorylation (GO:0006468);;	K08868|1.08756e-54|oas:101116008|K08868 alpha-kinase | (RefSeq) ALPK2; alpha kinase 2	--	--	--	--	--	S	Function unknown	PREDICTED: alpha-protein kinase 2 isoform X1 [Ovis aries]	molecular function: catalytic activity (GO:0003824);; biological process: metabolic process (GO:0008152);; biological process: cellular process (GO:0009987);; molecular function: binding (GO:0005488);; cellular component: cell (GO:0005623);; cellular component: organelle (GO:0043226);; cellular component: organelle part (GO:0044422);; cellular component: cell part (GO:0044464)
Ovis_aries_newGene_25585	8.36806	3.45255	7.65511	3.68831	2.69741	8.3856	3.15599	6.77872	2.75954	1.91846	2.67163	0.324964	-0.54638	normal	0.951459	0.0687804	normal	0.0124394	-0.916698	down	--	--	Cellular Component: nuclear chromatin (GO:0000790);; Molecular Function: RNA polymerase II core promoter proximal region sequence-specific DNA binding (GO:0000978);; Molecular Function: transcriptional activator activity, RNA polymerase II core promoter proximal region sequence-specific binding (GO:0001077);; Cellular Component: podosome (GO:0002102);; Cellular Component: nucleoplasm (GO:0005654)…	K12886|0|ssc:100622191|K12886 heterogeneous nuclear ribonucleoprotein K | (RefSeq) HNRNPK; heterogeneous nuclear ribonucleoprotein K	Spliceosome (ko03040);; Herpes simplex infection (ko05168);; Viral carcinogenesis (ko05203);; MicroRNAs in cancer (ko05206)	[AR]	RNA processing and modification;; General function prediction only	KH domain;; ROKNT (NUC014) domain;; KH domain;; KH domain	Heterogeneous nuclear ribonucleoprotein K OS=Oryctolagus cuniculus OX=9986 GN=HNRNPK PE=2 SV=1	K	Transcription	PREDICTED: heterogeneous nuclear ribonucleoprotein K isoform X3 [Bos mutus]	cellular component: cell (GO:0005623);; cellular component: membrane-enclosed lumen (GO:0031974);; cellular component: organelle (GO:0043226);; cellular component: organelle part (GO:0044422);; cellular component: cell part (GO:0044464);; molecular function: binding (GO:0005488);; molecular function: nucleic acid binding transcription factor activity (GO:0001071);; biological process: metabolic p…
Ovis_aries_newGene_5005	1.09902	0.802478	2.70234	0.149744	0.308082	0.239396	0.965261	1.84676	0.076572	0.985182	0.98982	0.0192351	-0.947246	down	0.849289	-0.176751	normal	0.577296	-0.325318	normal	--	--	--	--	--	--	--	--	--	--	--	--	--
Ovis_aries_newGene_6214	5.09847	2.2167	2.1945	0.283615	0.270262	5.51908	0.627156	4.89107	0.452289	0.706988	0	0.0292641	-0.898795	down	0.840058	0.183842	normal	0.146754	-0.596612	normal	--	--	Biological Process: detection of chemical stimulus involved in sensory perception of bitter taste (GO:0001580);; Molecular Function: nucleic acid binding (GO:0003676);; Molecular Function: metalloendopeptidase activity (GO:0004222);; Molecular Function: G-protein coupled receptor activity (GO:0004930);; Molecular Function: ATP binding (GO:0005524);; Cellular Component: extracellular space (GO:000…	K08474|1.53747e-29|bta:664647|K08474 taste receptor type 2 | (RefSeq) T2R65A; bitter taste receptor Bota-T2R65A	--	--	--	--	--	--	--	bitter taste receptor Bota-T2R65A [Bos taurus]	biological process: multicellular organismal process (GO:0032501);; biological process: response to stimulus (GO:0050896);; molecular function: binding (GO:0005488);; molecular function: catalytic activity (GO:0003824);; biological process: metabolic process (GO:0008152);; molecular function: signal transducer activity (GO:0004871);; molecular function: molecular transducer activity (GO:0060089);…
C1R	11.4546	13.3203	12.1216	5.96948	5.77034	11.6842	18.5045	11.6132	8.60678	5.74555	7.52491	0.000494663	-0.8313	down	0.570933	0.255158	normal	0.0563098	-0.611366	normal	[O]	Posttranslational modification, protein turnover, chaperones	Molecular Function: serine-type endopeptidase activity (GO:0004252);; Molecular Function: calcium ion binding (GO:0005509);; Biological Process: proteolysis (GO:0006508);; Biological Process: complement activation (GO:0006956);; Cellular Component: extracellular exosome (GO:0070062);; Cellular Component: blood microparticle (GO:0072562);;	K01330|0|oas:101107430|K01330 complement component 1, r subcomponent [EC:3.4.21.41] | (RefSeq) C1R; complement C1r subcomponent	Phagosome (ko04145);; Complement and coagulation cascades (ko04610);; Pertussis (ko05133);; Staphylococcus aureus infection (ko05150);; Systemic lupus erythematosus (ko05322)	[E]	Amino acid transport and metabolism	Trypsin;; CUB domain;; Sushi repeat (SCR repeat);; Coagulation Factor Xa inhibitory site;; Complement Clr-like EGF-like	Complement C1r subcomponent OS=Pongo abelii OX=9601 GN=C1R PE=2 SV=1	O	Posttranslational modification, protein turnover, chaperones	PREDICTED: complement C1r subcomponent isoform X1 [Ovis aries]	molecular function: catalytic activity (GO:0003824);; biological process: metabolic process (GO:0008152);; molecular function: binding (GO:0005488);; biological process: immune system process (GO:0002376);; biological process: response to stimulus (GO:0050896);; biological process: biological regulation (GO:0065007);; cellular component: extracellular region (GO:0005576);; cellular component: org…
C1S	13.3657	12.5307	12.7404	5.92191	8.20265	7.61393	17.8916	12.0175	11.6045	8.13001	6.62092	0.0172113	-0.654776	down	0.954985	0.0495016	normal	0.241043	-0.439256	normal	[O]	Posttranslational modification, protein turnover, chaperones	Molecular Function: serine-type endopeptidase activity (GO:0004252);; Molecular Function: calcium ion binding (GO:0005509);; Biological Process: proteolysis (GO:0006508);; Biological Process: complement activation, classical pathway (GO:0006958);; Molecular Function: identical protein binding (GO:0042802);; Biological Process: innate immune response (GO:0045087);; Cellular Component: extracellula…	K01331|0|oas:101107688|K01331 complement component 1, s subcomponent [EC:3.4.21.42] | (RefSeq) C1S; complement C1s	Complement and coagulation cascades (ko04610);; Pertussis (ko05133);; Staphylococcus aureus infection (ko05150);; Systemic lupus erythematosus (ko05322)	[E]	Amino acid transport and metabolism	Trypsin;; CUB domain;; Sushi repeat (SCR repeat);; Coagulation Factor Xa inhibitory site;; Calcium-binding EGF domain	Complement C1s subcomponent OS=Bos taurus OX=9913 GN=C1S PE=2 SV=2	O	Posttranslational modification, protein turnover, chaperones	complement C1s subcomponent isoform X1 [Odocoileus virginianus texanus]	molecular function: catalytic activity (GO:0003824);; biological process: metabolic process (GO:0008152);; molecular function: binding (GO:0005488);; biological process: immune system process (GO:0002376);; biological process: response to stimulus (GO:0050896);; biological process: biological regulation (GO:0065007);; cellular component: extracellular region (GO:0005576);; cellular component: org…
C7	5.28611	5.02378	4.40792	1.0841	1.93097	2.46676	3.92294	3.75272	2.98368	1.98171	1.92554	3.81e-05	-1.19017	down	0.405492	-0.355907	normal	0.00137553	-0.878604	down	--	--	Cellular Component: membrane attack complex (GO:0005579);; Biological Process: complement activation, alternative pathway (GO:0006957);; Biological Process: complement activation, classical pathway (GO:0006958);; Biological Process: cytolysis (GO:0019835);; Cellular Component: extracellular exosome (GO:0070062);;	K03996|0|oas:101102931|K03996 complement component 7 | (RefSeq) C7; complement C7	Complement and coagulation cascades (ko04610);; Prion diseases (ko05020);; Systemic lupus erythematosus (ko05322)	--	--	MAC/Perforin domain;; Sushi repeat (SCR repeat);; Low-density lipoprotein receptor domain class A;; Thrombospondin type 1 domain	Complement component C7 OS=Bos taurus OX=9913 GN=C7 PE=2 SV=1	O	Posttranslational modification, protein turnover, chaperones	PREDICTED: complement component C7 isoform X1 [Ovis aries musimon]	cellular component: cell (GO:0005623);; cellular component: membrane (GO:0016020);; cellular component: macromolecular complex (GO:0032991);; cellular component: membrane part (GO:0044425);; cellular component: cell part (GO:0044464);; biological process: immune system process (GO:0002376);; biological process: metabolic process (GO:0008152);; biological process: response to stimulus (GO:0050896)…
COL14A1	6.78896	5.35653	6.34752	3.44951	3.28341	3.92438	8.05868	6.45009	2.30582	2.68927	4.03998	0.00212248	-0.682637	down	0.907631	0.0913125	normal	0.0291704	-0.757997	down	--	--	Cellular Component: extracellular space (GO:0005615);; Cellular Component: extracellular matrix (GO:0031012);; Molecular Function: RNA binding (GO:0044822);; Cellular Component: extracellular exosome (GO:0070062);;	K08133|0|chx:102178089|K08133 collagen, type XIV, alpha | (RefSeq) COL14A1; collagen type XIV alpha 1 chain	Protein digestion and absorption (ko04974)	[W]	Extracellular structures	von Willebrand factor type A domain;; Fibronectin type III domain;; Collagen triple helix repeat (20 copies);; von Willebrand factor type A domain;; Purple acid Phosphatase, N-terminal domain;; Uncharacterised conserved protein (DUF2369);; Interferon-alpha/beta receptor, fibronectin type III	Collagen alpha-1(XII) chain (Fragment) OS=Oryctolagus cuniculus OX=9986 GN=COL12A1 PE=2 SV=1	U	Intracellular trafficking, secretion, and vesicular transport	PREDICTED: collagen alpha-1(XIV) chain isoform X3 [Ovis aries musimon]	cellular component: extracellular region (GO:0005576);; cellular component: extracellular region part (GO:0044421);; cellular component: organelle (GO:0043226)
LOC101112822	9.47584	19.03	15.2477	3.27792	6.47917	7.68026	15.8991	11.6649	6.39733	11.059	6.07932	0.046494	-0.861848	down	0.84814	-0.163398	normal	0.22971	-0.579235	normal	--	--	Molecular Function: nucleic acid binding (GO:0003676);; Molecular Function: ribonuclease A activity (GO:0004522);; Cellular Component: extracellular region (GO:0005576);; Biological Process: RNA phosphodiester bond hydrolysis, endonucleolytic (GO:0090502);;	K01168|4.92908e-83|oas:101112822|K01168 pancreatic ribonuclease [EC:3.1.27.5] | (RefSeq) BRB, BRN; brain ribonuclease-like	--	--	--	Pancreatic ribonuclease	Brain ribonuclease OS=Ovis aries OX=9940 GN=BRN PE=3 SV=1	A	RNA processing and modification	PREDICTED: brain ribonuclease-like isoform X1 [Ovis aries]	molecular function: binding (GO:0005488);; molecular function: catalytic activity (GO:0003824);; biological process: metabolic process (GO:0008152);; biological process: cellular process (GO:0009987);; cellular component: extracellular region (GO:0005576)
LOC101112891	3.91321	8.05988	5.82809	1.19136	1.20012	3.46547	5.52089	3.79359	7.00443	1.39815	2.16457	6.43e-07	-1.4771	down	0.644336	-0.28462	normal	0.719364	-0.240421	normal	[R]	General function prediction only	Molecular Function: endopeptidase inhibitor activity (GO:0004866);; Cellular Component: extracellular space (GO:0005615);; Biological Process: inflammatory response (GO:0006954);; Biological Process: complement activation (GO:0006956);; Biological Process: negative regulation of endopeptidase activity (GO:0010951);;	K03989|0|chx:102189753|K03989 complement component 4 | (RefSeq) complement C4	Complement and coagulation cascades (ko04610);; Pertussis (ko05133);; Staphylococcus aureus infection (ko05150);; Systemic lupus erythematosus (ko05322)	[O]	Posttranslational modification, protein turnover, chaperones	A-macroglobulin complement component;; A-macroglobulin receptor;; Alpha-2-macroglobulin family;; Alpha-2-macroglobulin family N-terminal region;; MG2 domain;; Alpha-macro-globulin thiol-ester bond-forming region;; Anaphylotoxin-like domain;; UNC-6/NTR/C345C module	Complement C4 (Fragments) OS=Bos taurus OX=9913 GN=C4 PE=1 SV=2	S	Function unknown	PREDICTED: complement C4 isoform X1 [Capra hircus]	molecular function: molecular function regulator (GO:0098772);; biological process: biological regulation (GO:0065007);; cellular component: extracellular region (GO:0005576);; cellular component: extracellular region part (GO:0044421);; biological process: response to stimulus (GO:0050896);; biological process: immune system process (GO:0002376);; biological process: metabolic process (GO:000815…
gene-LOC101113252	7.09489	8.61725	7.54614	5.94354	3.46476	3.92245	9.69983	13.3077	2.0737	3.07205	4.60213	0.36885	-0.455089	normal	0.775032	0.223549	normal	0.0183427	-0.859387	down	[D]	Cell cycle control, cell division, chromosome partitioning	Molecular Function: microfilament motor activity (GO:0000146);; Biological Process: skeletal muscle contraction (GO:0003009);; Molecular Function: ATP binding (GO:0005524);; Cellular Component: myosin complex (GO:0016459);; Molecular Function: ATPase activity, coupled (GO:0042623);; Cellular Component: contractile fiber (GO:0043292);; Biological Process: ATP metabolic process (GO:0046034);; Molec…	K10352|0|bom:102283722|K10352 myosin heavy chain | (RefSeq) MYH3; myosin-3	Tight junction (ko04530)	[Z]	Cytoskeleton	Myosin head (motor domain);; Myosin tail;; Myosin N-terminal SH3-like domain	Myosin-2 OS=Canis lupus familiaris OX=9615 GN=MYH2 PE=3 SV=1	Z	Cytoskeleton	PREDICTED: myosin-3 isoform X2 [Ovis aries musimon]	molecular function: catalytic activity (GO:0003824);; biological process: multicellular organismal process (GO:0032501);; molecular function: binding (GO:0005488);; cellular component: cell (GO:0005623);; cellular component: macromolecular complex (GO:0032991);; cellular component: organelle (GO:0043226);; cellular component: organelle part (GO:0044422);; cellular component: cell part (GO:0044464…
LOC101123672	2.60751	6.6609	3.32716	1.39622	0.808139	3.60084	4.25202	3.67542	5.41804	1.23197	1.46261	0.0191557	-0.95771	down	0.990612	-0.0111539	normal	0.787069	-0.189315	normal	[R]	General function prediction only	Molecular Function: endopeptidase inhibitor activity (GO:0004866);; Cellular Component: extracellular space (GO:0005615);; Biological Process: inflammatory response (GO:0006954);; Biological Process: complement activation (GO:0006956);; Biological Process: negative regulation of endopeptidase activity (GO:0010951);;	--	--	[O]	Posttranslational modification, protein turnover, chaperones	A-macroglobulin complement component;; A-macroglobulin receptor;; Alpha-2-macroglobulin family;; Alpha-2-macroglobulin family N-terminal region;; MG2 domain;; Alpha-macro-globulin thiol-ester bond-forming region;; Anaphylotoxin-like domain;; UNC-6/NTR/C345C module	Complement C4 (Fragments) OS=Bos taurus OX=9913 GN=C4 PE=1 SV=2	S	Function unknown	PREDICTED: complement C4 isoform X1 [Capra hircus]	molecular function: molecular function regulator (GO:0098772);; biological process: biological regulation (GO:0065007);; cellular component: extracellular region (GO:0005576);; cellular component: extracellular region part (GO:0044421);; biological process: response to stimulus (GO:0050896);; biological process: immune system process (GO:0002376);; biological process: metabolic process (GO:000815…
LOC114108725	9.99772	11.7001	6.43933	1.2161	1.8008	12.715	2.06464	7.81173	6.13886	6.87724	5.32252	1.26e-08	-1.64468	down	0.974807	-0.0341174	normal	0.342035	-0.441472	normal	--	--	Molecular Function: antigen binding (GO:0003823);; Cellular Component: plasma membrane (GO:0005886);; Cellular Component: integral component of membrane (GO:0016021);; Biological Process: antigen processing and presentation (GO:0019882);; Biological Process: natural killer cell mediated cytotoxicity (GO:0042267);; Molecular Function: natural killer cell lectin-like receptor binding (GO:0046703);;	K07986|2.76358e-108|bta:100126815|K07986 UL16 binding protein | (RefSeq) MHC class I-like family A1	Natural killer cell mediated cytotoxicity (ko04650)	--	--	Class I Histocompatibility antigen, domains alpha 1 and 2	Zinc-alpha-2-glycoprotein OS=Bos taurus OX=9913 GN=AZGP1 PE=2 SV=1	S	Function unknown	PREDICTED: NKG2D ligand 1-like isoform X1 [Capra hircus]	molecular function: binding (GO:0005488);; cellular component: cell (GO:0005623);; cellular component: membrane (GO:0016020);; cellular component: cell part (GO:0044464);; cellular component: membrane part (GO:0044425);; biological process: immune system process (GO:0002376);; biological process: cell killing (GO:0001906);; biological process: single-organism process (GO:0044699);; biological pro…
SERPING1	12.4863	13.4286	8.99155	5.13354	4.21015	5.92999	10.0107	9.22564	7.70759	5.43881	5.75926	0.00422597	-0.923901	down	0.594456	-0.28965	normal	0.0471072	-0.689767	down	[O]	Posttranslational modification, protein turnover, chaperones	Biological Process: negative regulation of complement activation, lectin pathway (GO:0001869);; Molecular Function: serine-type endopeptidase inhibitor activity (GO:0004867);; Biological Process: negative regulation of endopeptidase activity (GO:0010951);; Biological Process: fibrinolysis (GO:0042730);; Cellular Component: extracellular exosome (GO:0070062);; Cellular Component: blood micropartic…	K04001|0|oas:101121454|K04001 C1 inhibitor | (RefSeq) SERPING1; serpin family G member 1	Complement and coagulation cascades (ko04610);; Pertussis (ko05133)	[V]	Defense mechanisms	Serpin (serine protease inhibitor)	Factor XIIa inhibitor OS=Bos taurus OX=9913 PE=1 SV=1	O	Posttranslational modification, protein turnover, chaperones	PREDICTED: plasma protease C1 inhibitor isoform X3 [Ovis aries musimon]	biological process: biological regulation (GO:0065007);; molecular function: molecular function regulator (GO:0098772);; cellular component: extracellular region (GO:0005576);; cellular component: organelle (GO:0043226);; cellular component: extracellular region part (GO:0044421)

## Sheet: cluster5
#ID
Ovis_aries_newGene_21195	38.7636	54.5386	33.2839	70.6327	48.9781	21.9285	22.1504	15.5343	125.929	42.2523	33.1562	0.448703	0.433631	normal	0.0352669	-0.742576	down	0.53282	0.375008	normal	[O]	Posttranslational modification, protein turnover, chaperones	Molecular Function: ATP binding (GO:0005524);;	--	--	[O]	Posttranslational modification, protein turnover, chaperones	Hsp70 protein	Heat shock cognate 71 kDa protein OS=Saguinus oedipus OX=9490 GN=HSPA8 PE=2 SV=1	O	Posttranslational modification, protein turnover, chaperones	PREDICTED: heat shock cognate 71 kDa protein-like [Echinops telfairi]	molecular function: binding (GO:0005488)
gene-LOC101114712	8.39075	13.8844	11.0103	10.5207	17.3173	2.99022	4.50784	6.31691	22.1055	14.7715	15.9314	0.678927	0.29262	normal	0.0295218	-0.814346	down	0.223402	0.514587	normal	[R]	General function prediction only	Molecular Function: methyltransferase activity (GO:0008168);; Biological Process: methylation (GO:0032259);;	--	--	[A]	RNA processing and modification	Lysine methyltransferase;; Ribosomal protein L11 methyltransferase (PrmA)	Protein-lysine methyltransferase METTL21E OS=Bos taurus OX=9913 GN=METTL21E PE=2 SV=1	S	Function unknown	PREDICTED: protein-lysine methyltransferase METTL21E isoform X1 [Ovis aries]	molecular function: catalytic activity (GO:0003824);; biological process: metabolic process (GO:0008152)
gene-ABTB2	1.4622	1.98824	2.07541	3.01768	3.50231	0.850748	2.52175	1.22809	6.52031	1.7188	4.45287	0.024848	0.747846	up	0.896832	-0.125293	normal	0.103906	0.73493	normal	[T]	Signal transduction mechanisms	Cellular Component: nucleoplasm (GO:0005654);; Molecular Function: protein heterodimerization activity (GO:0046982);; Biological Process: cellular response to toxic substance (GO:0097237);;	K10521|0|chx:102181883|K10521 ankyrin repeat and BTB/POZ domain-containing protein 2 | (RefSeq) ABTB2; ankyrin repeat and BTB domain containing 2	--	--	--	BTB/POZ domain;; Ankyrin repeats (3 copies);; Ankyrin repeat;; Ankyrin repeats (many copies);; Ankyrin repeat;; Ankyrin repeats (many copies)	RCC1 and BTB domain-containing protein 2 OS=Pongo abelii OX=9601 GN=RCBTB2 PE=2 SV=1	S	Function unknown	PREDICTED: ankyrin repeat and BTB/POZ domain-containing protein 2 isoform X2 [Ovis aries musimon]	cellular component: cell (GO:0005623);; cellular component: organelle (GO:0043226);; cellular component: organelle part (GO:0044422);; cellular component: cell part (GO:0044464);; molecular function: binding (GO:0005488);; biological process: cellular process (GO:0009987);; biological process: response to stimulus (GO:0050896)
gene-AGPAT2	9.66175	12.3098	10.1236	20.7647	23.3183	8.4388	16.8846	5.63921	19.8438	16.6506	18.8976	0.000137236	0.962837	up	0.982296	0.0218829	normal	0.0126306	0.694887	up	[I]	Lipid transport and metabolism	Biological Process: positive regulation of cytokine production (GO:0001819);; Molecular Function: 1-acylglycerol-3-phosphate O-acyltransferase activity (GO:0003841);; Cellular Component: endoplasmic reticulum (GO:0005783);; Biological Process: phosphatidic acid biosynthetic process (GO:0006654);; Cellular Component: integral component of membrane (GO:0016021);;	K13509|8.69878e-146|bom:102277646|K13509 lysophosphatidate acyltransferase [EC:2.3.1.51] | (RefSeq) AGPAT2; 1-acylglycerol-3-phosphate O-acyltransferase 2	Glycerolipid metabolism (ko00561);; Glycerophospholipid metabolism (ko00564);; Phospholipase D signaling pathway (ko04072);; Fat digestion and absorption (ko04975)	[I]	Lipid transport and metabolism	Acyltransferase	1-acyl-sn-glycerol-3-phosphate acyltransferase alpha OS=Bos taurus OX=9913 GN=AGPAT1 PE=2 SV=1	I	Lipid transport and metabolism	PREDICTED: 1-acyl-sn-glycerol-3-phosphate acyltransferase beta [Bos mutus]	biological process: biological regulation (GO:0065007);; molecular function: catalytic activity (GO:0003824);; cellular component: cell (GO:0005623);; cellular component: organelle (GO:0043226);; cellular component: cell part (GO:0044464);; biological process: metabolic process (GO:0008152);; biological process: cellular process (GO:0009987);; biological process: single-organism process (GO:00446…
gene-FABP3	301.998	358.454	436.827	743.434	846.031	206.369	909.38	178.737	722.271	611.845	947.943	1.27e-06	1.06707	up	0.926059	0.0988842	normal	0.000964661	0.902573	up	--	--	Molecular Function: transporter activity (GO:0005215);; Cellular Component: extracellular space (GO:0005615);; Cellular Component: mitochondrial matrix (GO:0005759);; Biological Process: transport (GO:0006810);; Molecular Function: cytoskeletal protein binding (GO:0008092);; Biological Process: regulation of inflammatory response (GO:0050727);; Cellular Component: extracellular exosome (GO:007006…	K08752|7.93838e-90|chx:100860846|K08752 fatty acid-binding protein 3, muscle and heart | (RefSeq) FABP3, H-FABP; fatty acid binding protein 3	PPAR signaling pathway (ko03320)	[I]	Lipid transport and metabolism	Lipocalin / cytosolic fatty-acid binding protein family;; Lipocalin / cytosolic fatty-acid binding protein family	Fatty acid-binding protein, heart OS=Bos taurus OX=9913 GN=FABP3 PE=1 SV=2	I	Lipid transport and metabolism	fatty acid-binding protein, heart [Capra hircus]	molecular function: transporter activity (GO:0005215);; cellular component: extracellular region (GO:0005576);; cellular component: extracellular region part (GO:0044421);; cellular component: cell (GO:0005623);; cellular component: membrane-enclosed lumen (GO:0031974);; cellular component: organelle (GO:0043226);; cellular component: organelle part (GO:0044422);; cellular component: cell part (G…
gene-LOC101110434	0.073778	0.485735	0.354426	0.196706	5.50738	0.284801	0.387782	1.1864	1.60531	1.36865	1.53231	--	--	--	--	--	--	0.0297894	0.895926	up	[Q]	Secondary metabolites biosynthesis, transport and catabolism	Molecular Function: oxidoreductase activity (GO:0016491);; Biological Process: oxidation-reduction process (GO:0055114);;	K04119|0|oas:101110434|K04119 aldo-keto reductase family 1 member C3 [EC:1.1.1.51 1.1.1.188 1.1.1.213 1.1.1.357] | (RefSeq) dihydrodiol dehydrogenase 3-like	Steroid hormone biosynthesis (ko00140);; Arachidonic acid metabolism (ko00590);; Ovarian steroidogenesis (ko04913)	[R]	General function prediction only	Aldo/keto reductase family	Dihydrodiol dehydrogenase 3 OS=Bos taurus OX=9913 PE=2 SV=1	S	Function unknown	PREDICTED: dihydrodiol dehydrogenase 3-like isoform X1 [Ovis aries]	molecular function: catalytic activity (GO:0003824);; biological process: metabolic process (GO:0008152);; biological process: single-organism process (GO:0044699)
gene-LOC105615767	2.85974	2.11709	2.06919	4.98964	6.41266	2.43633	1.53037	2.12672	6.26208	0.979865	5.98307	0.00695105	0.969329	up	0.975216	-0.0342194	normal	0.519227	0.387154	normal	--	--	Cellular Component: integral component of membrane (GO:0016021);;	--	--	[R]	General function prediction only	Hypoxia induced protein conserved region	HIG1 domain family member 1A, mitochondrial OS=Pongo abelii OX=9601 GN=HIGD1A PE=3 SV=1	S	Function unknown	PREDICTED: HIG1 domain family member 1A, mitochondrial isoform X1 [Pantholops hodgsonii]	cellular component: membrane (GO:0016020);; cellular component: membrane part (GO:0044425)
gene-METRNL	8.54229	10.1528	7.93432	19.4113	19.0126	5.12621	7.0507	6.11193	14.3052	7.81727	7.76222	2.28e-05	1.02946	up	0.380127	-0.361611	normal	0.847808	0.137614	normal	--	--	Molecular Function: hormone activity (GO:0005179);; Cellular Component: extracellular space (GO:0005615);; Biological Process: response to cold (GO:0009409);; Biological Process: response to muscle activity (GO:0014850);; Biological Process: negative regulation of inflammatory response (GO:0050728);; Cellular Component: extracellular exosome (GO:0070062);; Biological Process: positive regulation …	--	--	--	--	--	--	S	Function unknown	PREDICTED: meteorin-like protein [Bison bison bison]	molecular function: binding (GO:0005488);; cellular component: extracellular region (GO:0005576);; cellular component: extracellular region part (GO:0044421);; biological process: response to stimulus (GO:0050896);; biological process: biological regulation (GO:0065007);; cellular component: organelle (GO:0043226)
gene-METTL21C	2.84401	5.91563	7.55067	12.9377	18.7232	7.75635	6.13168	2.36515	13.7534	1.59671	10.9385	0.00900342	1.00748	up	0.946887	0.0777665	normal	0.815789	0.159224	normal	[R]	General function prediction only	Cellular Component: nucleus (GO:0005634);; Molecular Function: protein-lysine N-methyltransferase activity (GO:0016279);; Biological Process: peptidyl-lysine methylation (GO:0018022);;	--	--	[A]	RNA processing and modification	Lysine methyltransferase;; Methyltransferase domain	Protein-lysine methyltransferase METTL21C OS=Bos taurus OX=9913 GN=METTL21C PE=2 SV=1	Q	Secondary metabolites biosynthesis, transport and catabolism	PREDICTED: protein-lysine methyltransferase METTL21C [Capra hircus]	cellular component: cell (GO:0005623);; cellular component: organelle (GO:0043226);; cellular component: cell part (GO:0044464);; molecular function: catalytic activity (GO:0003824);; biological process: metabolic process (GO:0008152);; biological process: cellular process (GO:0009987)
gene-PPTC7	25.5446	22.8157	22.7025	33.2077	40.4187	13.2283	23.7331	18.2934	58.5634	30.1668	25.3697	0.0010396	0.681267	up	0.618352	-0.221011	normal	0.209496	0.534055	normal	--	--	Molecular Function: catalytic activity (GO:0003824);; Cellular Component: mitochondrion (GO:0005739);;	K17508|0|tup:102475899|K17508 protein phosphatase PTC7 [EC:3.1.3.16] | (RefSeq) PPTC7; PTC7 protein phosphatase homolog	--	[T]	Signal transduction mechanisms	Stage II sporulation protein E (SpoIIE);; Protein phosphatase 2C;; Protein phosphatase 2C	--	T	Signal transduction mechanisms	protein phosphatase PTC7 homolog [Sus scrofa]	molecular function: catalytic activity (GO:0003824);; cellular component: cell (GO:0005623);; cellular component: organelle (GO:0043226);; cellular component: cell part (GO:0044464)
gene-TP53INP2	18.1233	12.9309	17.0144	35.1246	54.925	5.49777	29.5718	13.5742	58.5474	18.7543	32.4376	1.26e-08	1.33038	up	0.96085	0.0565109	normal	0.0297894	0.841837	up	--	--	Biological Process: autophagosome assembly (GO:0000045);; Biological Process: osteoblast differentiation (GO:0001649);; Biological Process: tissue homeostasis (GO:0001894);; Cellular Component: nucleus (GO:0005634);; Cellular Component: autophagosome (GO:0005776);; Cellular Component: cytosol (GO:0005829);; Biological Process: ubiquitin-dependent protein catabolic process (GO:0006511);; Biologica…	K21247|1.72888e-88|chx:102174948|K21247 tumor protein p53-inducible nuclear protein 2 | (RefSeq) TP53INP2; tumor protein p53 inducible nuclear protein 2	--	--	--	DOR family	--	K	Transcription	PREDICTED: tumor protein p53-inducible nuclear protein 2 isoform X1 [Bos indicus]	biological process: metabolic process (GO:0008152);; biological process: cellular process (GO:0009987);; biological process: cellular component organization or biogenesis (GO:0071840);; biological process: developmental process (GO:0032502);; biological process: single-organism process (GO:0044699);; biological process: biological regulation (GO:0065007);; cellular component: cell (GO:0005623);; …

## Sheet: cluster6
#ID
Ovis_aries_newGene_13586	2.27773	2.70832	2.10966	0.49556	1.14478	0.952525	0.97213	1.03244	1.2425	1.69433	0.751352	0.0642452	-0.823134	normal	0.00737734	-0.8688	down	0.218082	-0.593121	normal	--	--	Molecular Function: nucleic acid binding (GO:0003676);; Molecular Function: RNA-directed DNA polymerase activity (GO:0003964);; Molecular Function: phospholipid binding (GO:0005543);; Cellular Component: proteinaceous extracellular matrix (GO:0005578);; Cellular Component: intracellular (GO:0005622);; Cellular Component: plasma membrane (GO:0005886);; Cellular Component: fascia adherens (GO:00059…	K09228|1.93056e-52|bta:100138479|K09228 KRAB domain-containing zinc finger protein | (RefSeq) zinc finger protein 510	--	--	--	--	LINE-1 reverse transcriptase homolog OS=Nycticebus coucang OX=9470 PE=3 SV=1	S	Function unknown	PREDICTED: LOW QUALITY PROTEIN: zinc finger protein 510 [Bos taurus]	molecular function: binding (GO:0005488);; molecular function: catalytic activity (GO:0003824);; biological process: metabolic process (GO:0008152);; biological process: cellular process (GO:0009987);; cellular component: extracellular region (GO:0005576);; cellular component: extracellular region part (GO:0044421);; cellular component: cell (GO:0005623);; cellular component: cell part (GO:004446…
Ovis_aries_newGene_14427	0.292228	0.631757	0.432797	0.038902	0.119203	0.03963	0.486928	0.622626	0.730983	1.62618	0.452695	0.0290453	-0.913635	down	0.96085	-0.054938	normal	0.306399	0.536407	normal	--	--	Molecular Function: nucleic acid binding (GO:0003676);; Molecular Function: protein binding (GO:0005515);; Cellular Component: intracellular (GO:0005622);; Biological Process: polyamine biosynthetic process (GO:0006596);; Biological Process: polyamine catabolic process (GO:0006598);; Biological Process: spermidine metabolic process (GO:0008216);; Biological Process: putrescine metabolic process (…	--	--	--	--	--	--	U	Intracellular trafficking, secretion, and vesicular transport	PREDICTED: protein eva-1 homolog C isoform X2 [Bos indicus]	molecular function: binding (GO:0005488);; cellular component: cell (GO:0005623);; cellular component: cell part (GO:0044464);; biological process: metabolic process (GO:0008152);; biological process: cellular process (GO:0009987);; molecular function: catalytic activity (GO:0003824);; biological process: biological regulation (GO:0065007);; biological process: single-organism process (GO:0044699)
Ovis_aries_newGene_15876	3.73243	3.01156	3.1992	1.91599	1.72893	2.39734	2.98726	2.9031	2.30412	2.6726	3.35654	0.004829	-0.665678	down	0.808333	-0.116724	normal	0.760824	-0.169556	normal	--	--	Molecular Function: RNA polymerase II core promoter sequence-specific DNA binding (GO:0000979);; Molecular Function: receptor binding (GO:0005102);; Cellular Component: nucleus (GO:0005634);; Cellular Component: peroxisome (GO:0005777);; Cellular Component: cytosol (GO:0005829);; Biological Process: putrescine biosynthetic process (GO:0009446);; Biological Process: putrescine catabolic process (G…	--	--	--	--	--	--	S	Function unknown	PREDICTED: uncharacterized protein LOC106991855 [Ovis aries]	molecular function: binding (GO:0005488);; cellular component: cell (GO:0005623);; cellular component: organelle (GO:0043226);; cellular component: cell part (GO:0044464);; biological process: metabolic process (GO:0008152);; biological process: cellular process (GO:0009987);; biological process: biological regulation (GO:0065007);; molecular function: catalytic activity (GO:0003824);; biological…
Ovis_aries_newGene_16492	4.50051	2.25158	3.41583	1.49865	1.34029	3.50421	2.44405	1.01649	1.73058	1.5924	1.84451	0.00656102	-0.814387	down	0.6981	-0.298508	normal	0.025882	-0.768748	down	--	--	--	--	--	--	--	--	--	--	--	uncharacterized protein LOC110141080 isoform X1 [Odocoileus virginianus texanus]	--
Ovis_aries_newGene_25032	1.25533	0.918911	1.30432	0.664792	0.914068	1.45052	1.56549	1.30476	2.18676	1.19114	0.907099	0.0318184	-0.619584	down	0.491407	0.331843	normal	0.967062	-0.0360447	normal	--	--	--	--	--	--	--	ENV polyprotein (coat polyprotein);; Matrix protein (MA), p15	Syncytin-2 OS=Callithrix jacchus OX=9483 GN=ERVFRD-1 PE=3 SV=1	S	Function unknown	PREDICTED: uncharacterized protein LOC105605488 [Ovis aries]	--
ABI3BP	6.98654	5.43183	7.21205	3.7654	3.89128	3.8059	4.58363	4.5273	4.92817	3.3619	3.52978	0.0188178	-0.585523	down	0.0859566	-0.434556	normal	0.0348604	-0.606182	down	--	--	Molecular Function: collagen binding (GO:0005518);; Cellular Component: interstitial matrix (GO:0005614);; Cellular Component: extracellular space (GO:0005615);; Molecular Function: heparin binding (GO:0008201);; Biological Process: positive regulation of cell-substrate adhesion (GO:0010811);; Biological Process: extracellular matrix organization (GO:0030198);;	--	--	--	--	Fibronectin type III domain	--	U	Intracellular trafficking, secretion, and vesicular transport	PREDICTED: target of Nesh-SH3 isoform X1 [Ovis aries musimon]	molecular function: binding (GO:0005488);; cellular component: extracellular region (GO:0005576);; cellular component: extracellular region part (GO:0044421);; biological process: biological regulation (GO:0065007);; biological process: cellular process (GO:0009987);; biological process: single-organism process (GO:0044699);; biological process: cellular component organization or biogenesis (GO:0…
ADAMTS16	2.0851	1.09774	1.567	0.665297	0.535544	0.693497	0.750193	0.556135	0.83635	0.957815	0.53268	0.0290453	-0.858707	down	0.0162232	-0.832951	down	0.118299	-0.679873	normal	--	--	Biological Process: branching involved in ureteric bud morphogenesis (GO:0001658);; Molecular Function: metalloendopeptidase activity (GO:0004222);; Cellular Component: proteinaceous extracellular matrix (GO:0005578);; Biological Process: proteolysis (GO:0006508);; Biological Process: integrin-mediated signaling pathway (GO:0007229);; Molecular Function: zinc ion binding (GO:0008270);;	K08630|0|phd:102330058|K08630 a disintegrin and metalloproteinase with thrombospondin motifs 16 [EC:3.4.24.-] | (RefSeq) ADAMTS16; ADAM metallopeptidase with thrombospondin type 1 motif 16	--	[O]	Posttranslational modification, protein turnover, chaperones	ADAM-TS Spacer 1;; Reprolysin family propeptide;; Reprolysin (M12B) family zinc metalloprotease;; Thrombospondin type 1 domain;; Metallo-peptidase family M12;; PLAC (protease and lacunin) domain;; Metallo-peptidase family M12B Reprolysin-like;; Metallo-peptidase family M12B Reprolysin-like;; Metallo-peptidase family M12B Reprolysin-like	A disintegrin and metalloproteinase with thrombospondin motifs 2 OS=Bos taurus OX=9913 GN=ADAMTS2 PE=1 SV=1	S	Function unknown	PREDICTED: A disintegrin and metalloproteinase with thrombospondin motifs 16 isoform X2 [Ovis aries musimon]	biological process: multicellular organismal process (GO:0032501);; biological process: developmental process (GO:0032502);; biological process: single-organism process (GO:0044699);; molecular function: catalytic activity (GO:0003824);; biological process: metabolic process (GO:0008152);; cellular component: extracellular region (GO:0005576);; cellular component: extracellular region part (GO:00…
ANTXR1	5.48928	6.12838	6.58105	3.1978	3.10827	4.3038	3.87739	4.35927	3.54241	3.45073	3.95347	0.0041813	-0.725264	down	0.407568	-0.339083	normal	0.039786	-0.598899	down	--	--	Molecular Function: transmembrane signaling receptor activity (GO:0004888);; Molecular Function: collagen binding (GO:0005518);; Biological Process: signal transduction (GO:0007165);; Cellular Component: cell surface (GO:0009986);; Cellular Component: integral component of membrane (GO:0016021);; Biological Process: reproductive process (GO:0022414);; Cellular Component: lamellipodium membrane (G…	K20909|0|tup:102469015|K20909 anthrax toxin receptor | (RefSeq) ANTXR1; anthrax toxin receptor 1	--	--	--	Anthrax receptor C-terminus region;; Anthrax receptor extracellular domain;; von Willebrand factor type A domain;; von Willebrand factor type A domain	Anthrax toxin receptor-like OS=Macaca fascicularis OX=9541 GN=ANTXRL PE=2 SV=1	U	Intracellular trafficking, secretion, and vesicular transport	anthrax toxin receptor 1 [Loxodonta africana]	molecular function: signal transducer activity (GO:0004871);; molecular function: molecular transducer activity (GO:0060089);; biological process: cellular process (GO:0009987);; biological process: signaling (GO:0023052);; biological process: single-organism process (GO:0044699);; biological process: response to stimulus (GO:0050896);; biological process: biological regulation (GO:0065007);; mol…
ARHGEF28	1.42207	1.26569	1.47083	0.736183	0.589123	0.882576	0.564884	0.920302	0.734633	1.11702	0.47625	0.031042	-0.763645	down	0.39577	-0.456297	normal	0.251827	-0.548123	normal	--	--	Molecular Function: Rho guanyl-nucleotide exchange factor activity (GO:0005089);; Cellular Component: intracellular (GO:0005622);; Biological Process: regulation of Rho protein signal transduction (GO:0035023);; Biological Process: positive regulation of GTPase activity (GO:0043547);;	K21072|0|oas:101112674|K21072 A-kinase anchor protein 28 | (RefSeq) ARHGEF28; Rho guanine nucleotide exchange factor 28	--	--	--	RhoGEF domain;; Phorbol esters/diacylglycerol binding domain (C1 domain);; PH domain	Rho guanine nucleotide exchange factor 2 OS=Sus scrofa OX=9823 GN=ARHGEF2 PE=2 SV=1	T	Signal transduction mechanisms	PREDICTED: rho guanine nucleotide exchange factor 28 isoform X1 [Ovis aries]	molecular function: molecular function regulator (GO:0098772);; biological process: biological regulation (GO:0065007);; cellular component: cell (GO:0005623);; cellular component: cell part (GO:0044464)
BOK	2.94094	3.37634	2.90407	1.406	0.886669	1.43447	2.10144	1.95865	2.09888	1.54941	1.37301	0.0352232	-0.8505	down	0.273483	-0.484825	normal	0.138467	-0.618488	normal	--	--	--	K02561|1.46242e-109|bta:504851|K02561 Bcl-2-related ovarian killer protein | (RefSeq) BOK; BOK, BCL2 family apoptosis regulator	Apoptosis - multiple species (ko04215)	[T]	Signal transduction mechanisms	Apoptosis regulator proteins, Bcl-2 family	--	U	Intracellular trafficking, secretion, and vesicular transport	PREDICTED: bcl-2-related ovarian killer protein isoform X3 [Capra hircus]	--
gene-CHST1	2.59595	2.43532	2.47901	1.07777	2.19515	2.26655	1.5253	1.86865	0.95773	1.07067	0.809316	0.62125	-0.338035	normal	0.789313	-0.192646	normal	0.000152598	-1.05951	down	--	--	Cellular Component: Golgi membrane (GO:0000139);; Molecular Function: N-acetylglucosamine 6-O-sulfotransferase activity (GO:0001517);; Biological Process: galactose metabolic process (GO:0006012);; Cellular Component: integral component of membrane (GO:0016021);; Biological Process: keratan sulfate metabolic process (GO:0042339);; Molecular Function: keratan sulfotransferase activity (GO:0045130)…	K01022|0|bta:506932|K01022 keratan sulfate 6-sulfotransferase 1 [EC:2.8.2.21] | (RefSeq) CHST1; carbohydrate sulfotransferase 1	Glycosaminoglycan biosynthesis - keratan sulfate (ko00533)	--	--	Sulfotransferase domain;; Sulfotransferase family	--	S	Function unknown	PREDICTED: carbohydrate sulfotransferase 1 [Ovis aries musimon]	cellular component: cell (GO:0005623);; cellular component: membrane (GO:0016020);; cellular component: organelle (GO:0043226);; cellular component: organelle part (GO:0044422);; cellular component: cell part (GO:0044464);; molecular function: catalytic activity (GO:0003824);; biological process: metabolic process (GO:0008152);; biological process: single-organism process (GO:0044699);; cellular …
CITED1	1.32921	1.70186	1.96444	0.458527	0.213711	0.305591	0.587421	1.11818	0.479506	0.175384	0.199457	0.0380465	-0.894805	down	0.432882	-0.485137	normal	0.0205251	-0.927085	down	--	--	Molecular Function: RNA polymerase II transcription coactivator activity (GO:0001105);; Biological Process: vasculogenesis (GO:0001570);; Biological Process: branching involved in ureteric bud morphogenesis (GO:0001658);; Molecular Function: chromatin binding (GO:0003682);; Cellular Component: nucleus (GO:0005634);; Cellular Component: cytosol (GO:0005829);; Biological Process: nucleocytoplasmic …	--	--	--	--	CITED	Cbp/p300-interacting transactivator 1 OS=Bos taurus OX=9913 GN=CITED1 PE=2 SV=1	K	Transcription	PREDICTED: cbp/p300-interacting transactivator 1 isoform X2 [Ovis aries musimon]	molecular function: transcription factor activity, protein binding (GO:0000988);; biological process: metabolic process (GO:0008152);; biological process: cellular process (GO:0009987);; biological process: biological regulation (GO:0065007);; biological process: developmental process (GO:0032502);; biological process: single-organism process (GO:0044699);; biological process: multicellular organ…
gene-CNR1	1.77593	0.892624	1.62802	0.225213	1.11132	0.71861	1.14881	0.892382	0.335591	0.469968	0.686643	0.543572	-0.409029	normal	0.487953	-0.381658	normal	0.019351	-0.914153	down	--	--	Molecular Function: cannabinoid receptor activity (GO:0004949);; Biological Process: adenylate cyclase-modulating G-protein coupled receptor signaling pathway (GO:0007188);; Biological Process: axonal fasciculation (GO:0007413);; Cellular Component: integral component of membrane (GO:0016021);; Cellular Component: axon (GO:0030424);; Cellular Component: growth cone (GO:0030426);; Biological Proce…	K04277|0|phd:102333666|K04277 cannabinoid receptor 1 | (RefSeq) CNR1; cannabinoid receptor 1	Rap1 signaling pathway (ko04015);; Neuroactive ligand-receptor interaction (ko04080);; Retrograde endocannabinoid signaling (ko04723)	[R]	General function prediction only	7 transmembrane receptor (rhodopsin family);; Serpentine type 7TM GPCR chemoreceptor Srsx;; Olfactory receptor;; Serpentine type 7TM GPCR chemoreceptor Srv;; Serpentine type 7TM GPCR chemoreceptor Srx	Cannabinoid receptor 1 OS=Pan troglodytes OX=9598 GN=CNR1 PE=2 SV=1	U	Intracellular trafficking, secretion, and vesicular transport	cannabinoid receptor 1 [Bos taurus]	molecular function: signal transducer activity (GO:0004871);; molecular function: molecular transducer activity (GO:0060089);; biological process: cellular process (GO:0009987);; biological process: signaling (GO:0023052);; biological process: single-organism process (GO:0044699);; biological process: response to stimulus (GO:0050896);; biological process: biological regulation (GO:0065007);; bio…
COLEC12	10.9124	11.0365	10.035	5.60373	6.73029	6.56896	6.69883	8.92115	5.05309	7.74767	7.08782	0.0192365	-0.604089	down	0.445729	-0.329629	normal	0.176834	-0.518792	normal	[R]	General function prediction only	Cellular Component: collagen trimer (GO:0005581);; Biological Process: phagocytosis, recognition (GO:0006910);; Molecular Function: signaling pattern recognition receptor activity (GO:0008329);; Cellular Component: integral component of membrane (GO:0016021);; Molecular Function: low-density lipoprotein particle binding (GO:0030169);; Molecular Function: carbohydrate binding (GO:0030246);; Biolog…	K10062|0|bta:504741|K10062 collectin sub-family member 12 | (RefSeq) COLEC12; collectin subfamily member 12	Phagosome (ko04145)	--	--	Collagen triple helix repeat (20 copies);; Lectin C-type domain	Collectin-12 OS=Bos taurus OX=9913 GN=COLEC12 PE=2 SV=1	U	Intracellular trafficking, secretion, and vesicular transport	collectin-12 [Bos taurus]	cellular component: macromolecular complex (GO:0032991);; biological process: cellular process (GO:0009987);; biological process: single-organism process (GO:0044699);; molecular function: signal transducer activity (GO:0004871);; molecular function: molecular transducer activity (GO:0060089);; biological process: signaling (GO:0023052);; biological process: response to stimulus (GO:0050896);; bi…
DDR2	7.8495	6.79638	6.31208	3.92834	3.33569	6.24988	5.45306	4.90539	4.74539	4.24485	4.51792	0.0238214	-0.673358	down	0.750936	-0.178371	normal	0.0718842	-0.520213	normal	[M]	Cell wall/membrane/envelope biogenesis	Biological Process: endochondral bone growth (GO:0003416);; Molecular Function: collagen binding (GO:0005518);; Molecular Function: ATP binding (GO:0005524);; Cellular Component: integral component of plasma membrane (GO:0005887);; Cellular Component: focal adhesion (GO:0005925);; Biological Process: positive regulation of fibroblast migration (GO:0010763);; Biological Process: peptidyl-tyrosine …	K05125|0|chx:100860806|K05125 discoidin domain receptor family member 2 [EC:2.7.10.1] | (RefSeq) DDR2; discoidin domain receptor tyrosine kinase 2	--	[T]	Signal transduction mechanisms	Protein tyrosine kinase;; Protein kinase domain;; F5/8 type C domain	Epithelial discoidin domain-containing receptor 1 OS=Pan troglodytes OX=9598 GN=DDR1 PE=3 SV=1	T	Signal transduction mechanisms	PREDICTED: discoidin domain-containing receptor 2 isoform X1 [Ovis aries]	biological process: multicellular organismal process (GO:0032501);; biological process: developmental process (GO:0032502);; biological process: growth (GO:0040007);; biological process: single-organism process (GO:0044699);; molecular function: binding (GO:0005488);; cellular component: cell (GO:0005623);; cellular component: membrane (GO:0016020);; cellular component: membrane part (GO:0044425)…
DOCK4	2.71181	2.81786	2.389	1.47661	1.54249	2.17844	1.96725	2.06489	1.91991	2.20292	1.49327	0.046494	-0.598012	down	0.740678	-0.179969	normal	0.332431	-0.384574	normal	--	--	Molecular Function: guanyl-nucleotide exchange factor activity (GO:0005085);; Molecular Function: GTPase activator activity (GO:0005096);; Cellular Component: cytosol (GO:0005829);; Biological Process: small GTPase mediated signal transduction (GO:0007264);; Biological Process: positive regulation of smooth muscle cell migration (GO:0014911);; Cellular Component: membrane (GO:0016020);; Molecular…	K17697|0|oas:101113058|K17697 dedicator of cytokinesis protein 4 | (RefSeq) DOCK4; dedicator of cytokinesis 4	Rap1 signaling pathway (ko04015)	[T]	Signal transduction mechanisms	Dock homology region 2;; DOCK N-terminus;; C2 domain in Dock180 and Zizimin proteins;; Variant SH3 domain	--	S	Function unknown	PREDICTED: dedicator of cytokinesis protein 4 isoform X1 [Ovis aries]	molecular function: molecular function regulator (GO:0098772);; biological process: biological regulation (GO:0065007);; cellular component: cell (GO:0005623);; cellular component: cell part (GO:0044464);; biological process: cellular process (GO:0009987);; biological process: signaling (GO:0023052);; biological process: single-organism process (GO:0044699);; biological process: response to stimu…
DPY19L3	1.658	1.83977	1.80903	0.745704	0.646534	1.44657	1.14914	0.765619	0.669566	0.973719	0.884346	0.00519303	-0.935626	down	0.486722	-0.398562	normal	0.0531425	-0.761514	normal	--	--	Molecular Function: mannosyltransferase activity (GO:0000030);; Cellular Component: nuclear inner membrane (GO:0005637);; Cellular Component: integral component of membrane (GO:0016021);; Biological Process: protein C-linked glycosylation via 2'-alpha-mannosyl-L-tryptophan (GO:0018406);;	--	--	[S]	Function unknown	Q-cell neuroblast polarisation	Probable C-mannosyltransferase DPY19L3 OS=Pongo abelii OX=9601 GN=DPY19L3 PE=2 SV=1	U	Intracellular trafficking, secretion, and vesicular transport	PREDICTED: probable C-mannosyltransferase DPY19L3 [Ovis aries]	molecular function: catalytic activity (GO:0003824);; cellular component: cell (GO:0005623);; cellular component: membrane (GO:0016020);; cellular component: organelle (GO:0043226);; cellular component: organelle part (GO:0044422);; cellular component: cell part (GO:0044464);; cellular component: membrane part (GO:0044425);; biological process: metabolic process (GO:0008152);; biological process:…
gene-EPHB4	11.3125	10.1747	11.9126	6.64551	8.46346	8.07898	6.79821	8.24387	6.39787	7.79899	5.95325	0.200843	-0.400488	normal	0.416156	-0.32892	normal	0.0254903	-0.601874	down	--		Biological Process: cell migration involved in sprouting angiogenesis (GO:0002042);; Molecular Function: ephrin receptor activity (GO:0005003);; Molecular Function: ATP binding (GO:0005524);; Cellular Component: integral component of plasma membrane (GO:0005887);; Biological Process: cell adhesion (GO:0007155);; Biological Process: peptidyl-tyrosine phosphorylation (GO:0018108);; Biological Proce…	K05113|0|phd:102316367|K05113 Eph receptor B4 [EC:2.7.10.1] | (RefSeq) EPHB4; EPH receptor B4	Axon guidance (ko04360)	[T]	Signal transduction mechanisms	Protein tyrosine kinase;; Ephrin receptor ligand binding domain;; Protein kinase domain;; Fibronectin type III domain;; Ephrin type-A receptor 2 transmembrane domain;; SAM domain (Sterile alpha motif);; SAM domain (Sterile alpha motif);; Putative ephrin-receptor like	Ephrin type-A receptor 2 OS=Macaca fascicularis OX=9541 GN=EPHA2 PE=2 SV=1	T	Signal transduction mechanisms	PREDICTED: ephrin type-B receptor 4 isoform X2 [Ovis aries musimon]	biological process: cellular process (GO:0009987);; biological process: multicellular organismal process (GO:0032501);; biological process: locomotion (GO:0040011);; biological process: single-organism process (GO:0044699);; biological process: localization (GO:0051179);; molecular function: catalytic activity (GO:0003824);; molecular function: signal transducer activity (GO:0004871);; molecular …
FLT4	1.7368	1.18377	1.00215	0.429597	0.549288	0.750692	0.990668	0.802196	0.896133	0.87379	1.11899	0.0193111	-0.886081	down	0.446779	-0.389755	normal	0.607962	-0.291668	normal	[T]	Signal transduction mechanisms	Biological Process: positive regulation of endothelial cell proliferation (GO:0001938);; Biological Process: lymphangiogenesis (GO:0001946);; Biological Process: sprouting angiogenesis (GO:0002040);; Molecular Function: vascular endothelial growth factor-activated receptor activity (GO:0005021);; Molecular Function: ATP binding (GO:0005524);; Cellular Component: integral component of plasma membr…	K05097|0|chx:102180480|K05097 FMS-like tyrosine kinase 4 [EC:2.7.10.1] | (RefSeq) FLT4; fms related tyrosine kinase 4	Ras signaling pathway (ko04014);; Rap1 signaling pathway (ko04015);; Cytokine-cytokine receptor interaction (ko04060);; PI3K-Akt signaling pathway (ko04151);; Focal adhesion (ko04510)	[T]	Signal transduction mechanisms	Protein tyrosine kinase;; Immunoglobulin domain;; Immunoglobulin I-set domain;; Protein kinase domain;; Immunoglobulin domain;; Immunoglobulin domain;; Immunoglobulin V-set domain;; Izumo-like Immunoglobulin domain	Mast/stem cell growth factor receptor Kit OS=Callithrix jacchus OX=9483 GN=KIT PE=2 SV=1	T	Signal transduction mechanisms	PREDICTED: vascular endothelial growth factor receptor 3 isoform X3 [Ovis aries musimon]	biological process: biological regulation (GO:0065007);; biological process: developmental process (GO:0032502);; biological process: single-organism process (GO:0044699);; biological process: multicellular organismal process (GO:0032501);; molecular function: catalytic activity (GO:0003824);; molecular function: signal transducer activity (GO:0004871);; molecular function: molecular transducer a…
FREM2	0.618177	0.482832	0.558763	0.14944	0.070186	0.439498	0.174071	0.249752	0.223617	0.416478	0.450629	6.93e-06	-1.39685	down	0.405492	-0.48651	normal	0.488835	-0.378833	normal	[S]	Function unknown	Biological Process: morphogenesis of an epithelium (GO:0002009);; Cellular Component: basement membrane (GO:0005604);; Biological Process: cell communication (GO:0007154);; Biological Process: heart development (GO:0007507);; Cellular Component: integral component of membrane (GO:0016021);; Biological Process: inner ear development (GO:0048839);; Cellular Component: extracellular exosome (GO:0070…	--	--	[R]	General function prediction only	Cadherin-like;; Calx-beta domain	Sodium/calcium exchanger 1 OS=Canis lupus familiaris OX=9615 GN=SLC8A1 PE=1 SV=1	S	Function unknown	PREDICTED: FRAS1-related extracellular matrix protein 2 isoform X2 [Ovis aries musimon]	biological process: developmental process (GO:0032502);; biological process: single-organism process (GO:0044699);; cellular component: extracellular region (GO:0005576);; cellular component: extracellular region part (GO:0044421);; biological process: cellular process (GO:0009987);; biological process: multicellular organismal process (GO:0032501);; cellular component: membrane (GO:0016020);; ce…
FSCN1	19.3815	18.5414	16.7113	9.79535	11.4174	13.9224	13.0096	11.6873	9.22335	15.478	9.08543	0.0192896	-0.596446	down	0.40731	-0.318524	normal	0.22331	-0.508075	normal	--	--	Cellular Component: stress fiber (GO:0001725);; Cellular Component: ruffle (GO:0001726);; Cellular Component: podosome (GO:0002102);; Cellular Component: cytoplasm (GO:0005737);; Cellular Component: microvillus (GO:0005902);; Cellular Component: cell-cell junction (GO:0005911);; Biological Process: cell-cell junction assembly (GO:0007043);; Molecular Function: drug binding (GO:0008144);; Biologic…	K17455|0|chx:102179537|K17455 fascin 1/2 | (RefSeq) FSCN1; fascin actin-bundling protein 1	--	--	--	Fascin domain;; FRG1-like domain	Fascin-2 OS=Bos taurus OX=9913 GN=FSCN2 PE=2 SV=1	O	Posttranslational modification, protein turnover, chaperones	PREDICTED: fascin isoform X3 [Ovis aries musimon]	cellular component: cell (GO:0005623);; cellular component: organelle (GO:0043226);; cellular component: organelle part (GO:0044422);; cellular component: cell part (GO:0044464);; cellular component: macromolecular complex (GO:0032991);; cellular component: cell junction (GO:0030054);; biological process: cellular process (GO:0009987);; biological process: single-organism process (GO:0044699);; b…
GCNA	3.0686	2.23492	3.09368	1.54471	1.61599	2.01072	2.2001	2.3997	1.56196	2.5473	1.52703	0.00843762	-0.787404	down	0.711917	-0.202737	normal	0.384782	-0.444819	normal	--	--	--	--	--	[S]	Function unknown	SprT-like family	--	S	Function unknown	PREDICTED: acidic repeat-containing protein isoform X1 [Ovis aries]	--
HIC1	5.50854	5.57147	5.26758	2.98536	3.27684	4.01183	5.49966	3.41605	3.41761	4.63541	3.59256	0.0468104	-0.596422	down	0.726519	-0.189449	normal	0.38045	-0.369156	normal	[R]	General function prediction only	Biological Process: negative regulation of transcription from RNA polymerase II promoter (GO:0000122);; Molecular Function: transcription factor activity, sequence-specific DNA binding (GO:0003700);; Cellular Component: nucleoplasm (GO:0005654);; Cellular Component: cytoplasm (GO:0005737);; Biological Process: intrinsic apoptotic signaling pathway in response to DNA damage (GO:0008630);; Biologic…	--	--	[R]	General function prediction only	BTB/POZ domain;; Zinc finger, C2H2 type;; C2H2-type zinc finger;; Zinc-finger double domain;; Zinc-finger double-stranded RNA-binding;; C2H2-type zinc finger;; Zinc-finger of C2H2 type	Zinc finger protein 22 OS=Bos taurus OX=9913 GN=ZNF22 PE=2 SV=1	S	Function unknown	hypermethylated in cancer 1 protein isoform X1 [Odocoileus virginianus texanus]	biological process: biological regulation (GO:0065007);; molecular function: nucleic acid binding transcription factor activity (GO:0001071);; cellular component: cell (GO:0005623);; cellular component: organelle (GO:0043226);; cellular component: organelle part (GO:0044422);; cellular component: cell part (GO:0044464);; biological process: cellular process (GO:0009987);; biological process: sign…
gene-ITM2C	31.0806	24.7702	27.3208	16.2697	19.6827	17.8404	22.9614	17.8423	17.2229	17.3286	15.4033	0.186296	-0.447582	normal	0.280116	-0.339818	normal	0.0160245	-0.614556	down	--	--	Molecular Function: amyloid-beta binding (GO:0001540);; Molecular Function: ATP binding (GO:0005524);; Cellular Component: lysosomal membrane (GO:0005765);; Cellular Component: Golgi apparatus (GO:0005794);; Cellular Component: plasma membrane (GO:0005886);; Biological Process: negative regulation of neuron projection development (GO:0010977);; Cellular Component: integral component of membrane (…	K18265|2.15714e-159|chx:102187089|K18265 integral membrane protein 2C | (RefSeq) ITM2C; integral membrane protein 2C	--	[S]	Function unknown	BRICHOS domain	Integral membrane protein 2C OS=Bos taurus OX=9913 GN=ITM2C PE=2 SV=1	S	Function unknown	PREDICTED: integral membrane protein 2C [Capra hircus]	molecular function: binding (GO:0005488);; cellular component: cell (GO:0005623);; cellular component: membrane (GO:0016020);; cellular component: organelle (GO:0043226);; cellular component: organelle part (GO:0044422);; cellular component: cell part (GO:0044464);; biological process: cellular process (GO:0009987);; biological process: multicellular organismal process (GO:0032501);; biological p…
JUP	14.6868	12.1684	14.0739	7.71629	7.88141	8.33286	11.7614	9.90498	8.01513	11.5434	7.16307	0.00255207	-0.619827	down	0.350008	-0.285337	normal	0.22331	-0.464274	normal	--	--	Biological Process: desmosome assembly (GO:0002159);; Molecular Function: transcription coactivator activity (GO:0003713);; Molecular Function: signal transducer activity (GO:0004871);; Molecular Function: structural molecule activity (GO:0005198);; Cellular Component: cytosol (GO:0005829);; Cellular Component: intermediate filament (GO:0005882);; Cellular Component: zonula adherens (GO:0005915);…	K10056|0|phd:102330342|K10056 junction plakoglobin | (RefSeq) JUP; junction plakoglobin	Pathways in cancer (ko05200);; Transcriptional misregulation in cancer (ko05202);; Acute myeloid leukemia (ko05221);; Arrhythmogenic right ventricular cardiomyopathy (ARVC) (ko05412)	[TZ]	Signal transduction mechanisms;; Cytoskeleton	Armadillo/beta-catenin-like repeat;; HEAT repeat;; V-ATPase subunit H	Junction plakoglobin OS=Bos taurus OX=9913 GN=JUP PE=2 SV=1	F	Nucleotide transport and metabolism	PREDICTED: junction plakoglobin [Pantholops hodgsonii]	biological process: cellular process (GO:0009987);; biological process: single-organism process (GO:0044699);; biological process: cellular component organization or biogenesis (GO:0071840);; molecular function: transcription factor activity, protein binding (GO:0000988);; biological process: biological regulation (GO:0065007);; molecular function: signal transducer activity (GO:0004871);; molecu…
KIT	2.20941	1.77147	2.07878	0.497922	1.02993	1.49221	0.95118	1.15247	1.01493	1.27735	1.07653	0.00239687	-1.06787	down	0.317768	-0.465885	normal	0.0325707	-0.732553	down	[T]	Signal transduction mechanisms	Biological Process: activation of MAPK activity (GO:0000187);; Biological Process: ovarian follicle development (GO:0001541);; Molecular Function: protease binding (GO:0002020);; Biological Process: myeloid progenitor cell differentiation (GO:0002318);; Biological Process: lymphoid progenitor cell differentiation (GO:0002320);; Biological Process: immature B cell differentiation (GO:0002327);; Bi…	K05091|0|chx:100861386|K05091 proto-oncogene tyrosine-protein kinase Kit [EC:2.7.10.1] | (RefSeq) KIT, SCFR; KIT proto-oncogene receptor tyrosine kinase	Ras signaling pathway (ko04014);; Rap1 signaling pathway (ko04015);; Cytokine-cytokine receptor interaction (ko04060);; Phospholipase D signaling pathway (ko04072);; Endocytosis (ko04144);; PI3K-Akt signaling pathway (ko04151);; Hematopoietic cell lineage (ko04640);; Melanogenesis (ko04916);; Pathways in cancer (ko05200);; Acute myeloid leukemia (ko05221);; Central carbon metabolism in cancer (ko…	[T]	Signal transduction mechanisms	Protein tyrosine kinase;; Protein kinase domain;; Immunoglobulin domain;; Immunoglobulin I-set domain;; Immunoglobulin domain;; Immunoglobulin domain	Mast/stem cell growth factor receptor Kit OS=Capra hircus OX=9925 GN=KIT PE=2 SV=1	T	Signal transduction mechanisms	PREDICTED: mast/stem cell growth factor receptor Kit isoform X1 [Bos indicus]	biological process: biological regulation (GO:0065007);; biological process: reproduction (GO:0000003);; biological process: reproductive process (GO:0022414);; biological process: multicellular organismal process (GO:0032501);; biological process: developmental process (GO:0032502);; biological process: single-organism process (GO:0044699);; biological process: rhythmic process (GO:0048511);; mo…
gene-KLF12	1.98747	1.81022	2.1467	1.57501	1.16105	1.75873	1.96404	1.19279	1.33193	1.18175	1.08471	0.45373	-0.347054	normal	0.856625	-0.120199	normal	0.00968852	-0.613326	down	--	--	Biological Process: negative regulation of transcription from RNA polymerase II promoter (GO:0000122);; Molecular Function: RNA polymerase II regulatory region sequence-specific DNA binding (GO:0000977);; Molecular Function: transcriptional repressor activity, RNA polymerase II transcription regulatory region sequence-specific binding (GO:0001227);; Cellular Component: nucleoplasm (GO:0005654);; …	K09205|0|rno:306110|K09205 krueppel-like factor 8/12 | (RefSeq) Klf12; Kruppel-like factor 12	--	[R]	General function prediction only	Zinc finger, C2H2 type;; Zinc-finger double domain;; C2H2-type zinc finger	Krueppel-like factor 17 OS=Sus scrofa OX=9823 GN=KLF17 PE=2 SV=1	S	Function unknown	PREDICTED: Krueppel-like factor 12 isoform X3 [Rousettus aegyptiacus]	biological process: biological regulation (GO:0065007);; molecular function: binding (GO:0005488);; molecular function: nucleic acid binding transcription factor activity (GO:0001071);; cellular component: cell (GO:0005623);; cellular component: organelle (GO:0043226);; cellular component: organelle part (GO:0044422);; cellular component: cell part (GO:0044464)
LAMB1	47.4005	35.5611	39.3287	21.169	21.8067	22.3501	34.028	25.4878	24.4502	29.4334	28.1376	0.000584434	-0.727431	down	0.142251	-0.413691	normal	0.139699	-0.461759	normal	--	--	Molecular Function: extracellular matrix structural constituent (GO:0005201);; Cellular Component: laminin-1 complex (GO:0005606);; Cellular Component: laminin-2 complex (GO:0005607);; Cellular Component: extracellular space (GO:0005615);; Biological Process: neuronal-glial interaction involved in cerebral cortex radial glia guided migration (GO:0021812);; Biological Process: positive regulation …	K05636|0|chx:102176661|K05636 laminin, beta 1 | (RefSeq) LAMB1; laminin subunit beta 1	PI3K-Akt signaling pathway (ko04151);; Focal adhesion (ko04510);; ECM-receptor interaction (ko04512);; Toxoplasmosis (ko05145);; Amoebiasis (ko05146);; Pathways in cancer (ko05200);; Small cell lung cancer (ko05222)	[W]	Extracellular structures	Laminin EGF domain;; Laminin N-terminal (Domain VI)	Netrin-4 OS=Pongo abelii OX=9601 GN=NTN4 PE=2 SV=1	U	Intracellular trafficking, secretion, and vesicular transport	PREDICTED: laminin subunit beta-1 [Ovis aries musimon]	molecular function: structural molecule activity (GO:0005198);; cellular component: extracellular region (GO:0005576);; cellular component: macromolecular complex (GO:0032991);; cellular component: extracellular region part (GO:0044421);; biological process: biological adhesion (GO:0022610);; biological process: single-organism process (GO:0044699);; biological process: biological regulation (GO:…
LOC101111337	5.10161	4.02599	4.57091	2.65707	2.52026	2.32641	3.94599	3.04908	2.30748	3.05102	3.01435	0.0111432	-0.626526	down	0.274248	-0.38459	normal	0.0981746	-0.55611	normal	--	--	--	--	--	--	--	Immunoglobulin I-set domain;; Immunoglobulin domain;; Immunoglobulin V-set domain;; Immunoglobulin domain	--	S	Function unknown	PREDICTED: SLAM family member 9-like isoform X3 [Ovis aries musimon]	--
LOC101112335	29.1781	29.4386	27.5138	13.1169	13.5228	24.7289	13.116	16.6776	14.3218	23.5749	12.5865	7.58e-08	-0.913861	down	0.487953	-0.376478	normal	0.153134	-0.569133	normal	[Q]	Secondary metabolites biosynthesis, transport and catabolism	Molecular Function: copper ion binding (GO:0005507);; Cellular Component: extracellular space (GO:0005615);; Cellular Component: plasma membrane (GO:0005886);; Biological Process: cell adhesion (GO:0007155);; Molecular Function: primary amine oxidase activity (GO:0008131);; Biological Process: amine metabolic process (GO:0009308);; Cellular Component: cell surface (GO:0009986);; Cellular Componen…	K00276|0|chx:102168295|K00276 primary-amine oxidase [EC:1.4.3.21] | (RefSeq) AOC3; membrane primary amine oxidase	Glycine, serine and threonine metabolism (ko00260);; Tyrosine metabolism (ko00350);; Phenylalanine metabolism (ko00360);; beta-Alanine metabolism (ko00410)	[Q]	Secondary metabolites biosynthesis, transport and catabolism	Copper amine oxidase, enzyme domain;; Copper amine oxidase, N3 domain;; Copper amine oxidase, N2 domain	Membrane primary amine oxidase OS=Bos taurus OX=9913 GN=AOC3 PE=2 SV=3	Q	Secondary metabolites biosynthesis, transport and catabolism	PREDICTED: membrane primary amine oxidase isoform X2 [Ovis aries musimon]	molecular function: binding (GO:0005488);; cellular component: extracellular region (GO:0005576);; cellular component: extracellular region part (GO:0044421);; cellular component: cell (GO:0005623);; cellular component: membrane (GO:0016020);; cellular component: cell part (GO:0044464);; biological process: biological adhesion (GO:0022610);; molecular function: catalytic activity (GO:0003824);; b…
LOC101115315	1.57105	1.5692	1.47205	0.66286	0.719554	1.01007	0.786826	1.45184	0.703215	0.996067	0.685357	0.00888442	-0.827392	down	0.717164	-0.253989	normal	0.0718842	-0.688024	normal	--	--	Molecular Function: transcription coactivator activity (GO:0003713);; Cellular Component: nucleoplasm (GO:0005654);; Biological Process: positive regulation of transcription of Notch receptor target (GO:0007221);;	K06061|0|oas:101115315|K06061 mastermind | (RefSeq) MAML3; mastermind like transcriptional coactivator 3	Notch signaling pathway (ko04330)	--	--	--	--	S	Function unknown	PREDICTED: LOW QUALITY PROTEIN: mastermind-like protein 3 [Ovis aries]	molecular function: transcription factor activity, protein binding (GO:0000988);; biological process: biological regulation (GO:0065007);; cellular component: cell (GO:0005623);; cellular component: organelle (GO:0043226);; cellular component: organelle part (GO:0044422);; cellular component: cell part (GO:0044464)
LOC101121522	2.63604	2.38353	2.4606	1.37469	1.51345	1.74061	1.79543	1.39264	1.8548	1.7591	1.44817	0.0152978	-0.604625	down	0.20634	-0.413046	normal	0.126337	-0.465098	normal	--	--	Molecular Function: calcium ion binding (GO:0005509);; Cellular Component: nucleoplasm (GO:0005654);; Cellular Component: cytoplasm (GO:0005737);; Cellular Component: plasma membrane (GO:0005886);; Biological Process: negative regulation of epithelial cell migration (GO:0010633);; Biological Process: establishment of protein localization (GO:0045184);; Biological Process: negative regulation of e…	--	--	--	--	PDZ domain of MCC-2 bdg protein for Usher syndrome	--	S	Function unknown	PREDICTED: colorectal mutant cancer protein isoform X3 [Ovis aries musimon]	molecular function: binding (GO:0005488);; cellular component: cell (GO:0005623);; cellular component: organelle (GO:0043226);; cellular component: organelle part (GO:0044422);; cellular component: cell part (GO:0044464);; cellular component: membrane (GO:0016020);; biological process: biological regulation (GO:0065007);; biological process: localization (GO:0051179)
LOC101123419	0.336793	0.439488	0.632647	0.125178	0.079096	0.424536	0.407473	0.316289	0.463273	0.126759	0.152157	0.015001	-0.987041	down	0.924883	-0.098714	normal	0.48505	-0.412515	normal	[R]	General function prediction only	Molecular Function: endopeptidase inhibitor activity (GO:0004866);; Cellular Component: extracellular space (GO:0005615);; Biological Process: inflammatory response (GO:0006954);; Biological Process: complement activation (GO:0006956);; Biological Process: negative regulation of endopeptidase activity (GO:0010951);;	--	--	[O]	Posttranslational modification, protein turnover, chaperones	A-macroglobulin complement component;; Alpha-2-macroglobulin family;; A-macroglobulin receptor;; Alpha-2-macroglobulin family N-terminal region;; Alpha-macro-globulin thiol-ester bond-forming region;; Anaphylotoxin-like domain;; MG2 domain	Complement C4 (Fragments) OS=Bos taurus OX=9913 GN=C4 PE=1 SV=2	S	Function unknown	PREDICTED: LOW QUALITY PROTEIN: complement C4-A-like [Capra hircus]	molecular function: molecular function regulator (GO:0098772);; biological process: biological regulation (GO:0065007);; cellular component: extracellular region (GO:0005576);; cellular component: extracellular region part (GO:0044421);; biological process: response to stimulus (GO:0050896);; biological process: immune system process (GO:0002376);; biological process: metabolic process (GO:000815…
MAGI1	2.94226	2.37277	2.3273	1.33527	1.51915	1.99036	1.66352	1.75729	1.70486	2.0135	1.3338	0.0378812	-0.619009	down	0.519554	-0.300894	normal	0.223772	-0.465707	normal	[F]	Nucleotide transport and metabolism	Cellular Component: nucleoplasm (GO:0005654);; Cellular Component: cytoplasm (GO:0005737);; Cellular Component: adherens junction (GO:0005912);; Cellular Component: bicellular tight junction (GO:0005923);; Molecular Function: protein complex scaffold activity (GO:0032947);; Cellular Component: cell projection (GO:0042995);; Molecular Function: alpha-actinin binding (GO:0051393);; Biological Proce…	K05631|0|mcc:698092|K05631 atrophin-1 interacting protein 3 (BAI1-associated protein 1) | (RefSeq) MAGI1; membrane associated guanylate kinase, WW and PDZ domain containing 1	Rap1 signaling pathway (ko04015);; Tight junction (ko04530)	[R]	General function prediction only	PDZ domain (Also known as DHR or GLGF);; Unstructured region on MAGI;; Unstructured region on MAGI;; PDZ domain;; WW domain;; Guanylate kinase;; Tricorn protease PDZ domain	Na(+)/H(+) exchange regulatory cofactor NHE-RF3 OS=Bos taurus OX=9913 GN=PDZK1 PE=2 SV=1	O	Posttranslational modification, protein turnover, chaperones	PREDICTED: membrane-associated guanylate kinase, WW and PDZ domain-containing protein 1 isoform X11 [Ovis aries musimon]	cellular component: cell (GO:0005623);; cellular component: organelle (GO:0043226);; cellular component: organelle part (GO:0044422);; cellular component: cell part (GO:0044464);; cellular component: cell junction (GO:0030054);; molecular function: structural molecule activity (GO:0005198);; molecular function: binding (GO:0005488);; biological process: cellular process (GO:0009987);; biological …
MAP1B	3.06659	2.73522	2.42699	1.48988	1.3794	1.38662	2.14253	1.49568	1.65119	1.70241	1.64164	0.00274425	-0.81634	down	0.00656369	-0.655922	down	0.065362	-0.550986	normal	--	--	Biological Process: microtubule bundle formation (GO:0001578);; Cellular Component: photoreceptor outer segment (GO:0001750);; Cellular Component: cytosol (GO:0005829);; Cellular Component: microtubule (GO:0005874);; Cellular Component: plasma membrane (GO:0005886);; Molecular Function: microtubule binding (GO:0008017);; Cellular Component: postsynaptic density of dendrite (GO:0014069);; Biologic…	K10429|0|oas:101116509|K10429 microtubule-associated protein 1 | (RefSeq) MAP1B; microtubule associated protein 1B	--	[Z]	Cytoskeleton	Neuraxin and MAP1B repeat	Microtubule-associated protein 1S OS=Bos taurus OX=9913 GN=MAP1S PE=2 SV=1	S	Function unknown	PREDICTED: microtubule-associated protein 1B isoform X2 [Ovis aries musimon]	biological process: cellular process (GO:0009987);; biological process: cellular component organization or biogenesis (GO:0071840);; cellular component: cell (GO:0005623);; cellular component: organelle (GO:0043226);; cellular component: organelle part (GO:0044422);; cellular component: cell part (GO:0044464);; cellular component: supramolecular complex (GO:0099080);; cellular component: membrane…
MFSD4A	3.52761	2.65072	2.43887	0.814762	0.917738	1.75554	1.07394	1.60925	1.1989	2.10111	0.995299	3.38e-06	-1.24937	down	0.197524	-0.582038	normal	0.134149	-0.658808	normal	--	--	Cellular Component: integral component of membrane (GO:0016021);;	--	--	--	--	Major Facilitator Superfamily	Major facilitator superfamily domain-containing protein 4A OS=Pongo abelii OX=9601 GN=MFSD4A PE=2 SV=1	U	Intracellular trafficking, secretion, and vesicular transport	PREDICTED: major facilitator superfamily domain-containing protein 4 [Ovis aries]	cellular component: membrane (GO:0016020);; cellular component: membrane part (GO:0044425)
MMP14	11.6335	9.43248	13.65	4.6652	6.52509	4.26592	9.02106	7.46477	7.0272	7.36811	7.04358	0.015554	-0.758277	down	0.22711	-0.501915	normal	0.066885	-0.557888	normal	[O]	Posttranslational modification, protein turnover, chaperones	Biological Process: endochondral ossification (GO:0001958);; Molecular Function: metalloendopeptidase activity (GO:0004222);; Molecular Function: calcium ion binding (GO:0005509);; Cellular Component: plasma membrane (GO:0005886);; Cellular Component: focal adhesion (GO:0005925);; Molecular Function: zinc ion binding (GO:0008270);; Biological Process: positive regulation of myotube differentiatio…	K07763|0|phd:102321416|K07763 matrix metalloproteinase-14 (membrane-inserted) [EC:3.4.24.80] | (RefSeq) MMP14; matrix metallopeptidase 14	TNF signaling pathway (ko04668);; GnRH signaling pathway (ko04912)	[OW]	Posttranslational modification, protein turnover, chaperones;; Extracellular structures	Matrixin;; Hemopexin;; Domain of unknown function (DUF3377);; Putative peptidoglycan binding domain	Matrix metalloproteinase-14 OS=Bos taurus OX=9913 GN=MMP14 PE=2 SV=1	O	Posttranslational modification, protein turnover, chaperones	matrix metalloproteinase-14 precursor [Ovis aries]	biological process: multicellular organismal process (GO:0032501);; biological process: single-organism process (GO:0044699);; molecular function: catalytic activity (GO:0003824);; biological process: metabolic process (GO:0008152);; molecular function: binding (GO:0005488);; cellular component: cell (GO:0005623);; cellular component: membrane (GO:0016020);; cellular component: cell part (GO:0044…
MRC1	2.44132	1.81279	3.04222	1.01255	1.2526	1.33928	3.12514	1.0382	1.38959	1.27711	2.16762	0.0448329	-0.746123	down	0.792287	-0.210217	normal	0.458145	-0.385298	normal	[Q]	Secondary metabolites biosynthesis, transport and catabolism	Molecular Function: transmembrane signaling receptor activity (GO:0004888);; Molecular Function: mannose binding (GO:0005537);; Cellular Component: plasma membrane (GO:0005886);; Biological Process: receptor-mediated endocytosis (GO:0006898);; Biological Process: signal transduction (GO:0007165);; Cellular Component: cell surface (GO:0009986);; Cellular Component: endosome membrane (GO:0010008);;…	K06560|0|chx:102181218|K06560 mannose receptor, C type | (RefSeq) MRC1; mannose receptor C-type 1	Phagosome (ko04145);; Tuberculosis (ko05152)	[TV]	Signal transduction mechanisms;; Defense mechanisms	Lectin C-type domain;; Fibronectin type II domain;; UL45 protein, carbohydrate-binding C-type lectin-like;; Ricin-type beta-trefoil lectin domain;; Extracellular link domain	Secretory phospholipase A2 receptor OS=Bos taurus OX=9913 GN=PLA2R1 PE=1 SV=1	U	Intracellular trafficking, secretion, and vesicular transport	PREDICTED: macrophage mannose receptor 1 [Capra hircus]	molecular function: signal transducer activity (GO:0004871);; molecular function: molecular transducer activity (GO:0060089);; biological process: cellular process (GO:0009987);; biological process: signaling (GO:0023052);; biological process: single-organism process (GO:0044699);; biological process: response to stimulus (GO:0050896);; biological process: biological regulation (GO:0065007);; mol…
MYH7B	7.75053	8.31003	9.47605	4.52826	5.30446	5.7633	13.0866	1.06648	4.50142	13.593	6.91714	0.0167782	-0.611099	down	0.936805	-0.0831121	normal	0.99063	0.0136005	normal	--	--	Molecular Function: motor activity (GO:0003774);; Molecular Function: actin binding (GO:0003779);; Molecular Function: ATP binding (GO:0005524);; Cellular Component: myosin complex (GO:0016459);;	K10352|0|chx:102175493|K10352 myosin heavy chain | (RefSeq) MYH7B; myosin heavy chain 7B	Tight junction (ko04530)	[Z]	Cytoskeleton	Myosin head (motor domain);; Myosin tail;; Myosin N-terminal SH3-like domain	Myosin-7 OS=Canis lupus familiaris OX=9615 GN=MYH7 PE=1 SV=3	Z	Cytoskeleton	PREDICTED: myosin-7B isoform X5 [Ovis aries musimon]	molecular function: catalytic activity (GO:0003824);; molecular function: binding (GO:0005488);; cellular component: cell (GO:0005623);; cellular component: macromolecular complex (GO:0032991);; cellular component: organelle (GO:0043226);; cellular component: organelle part (GO:0044422);; cellular component: cell part (GO:0044464)
gene-MYO7A	0.346924	0.23859	0.238451	0.08532	0.158522	0.146268	0.37805	0.114558	0.10394	0.081741	0.097204	0.278659	-0.599624	normal	0.86024	-0.16404	normal	0.00968852	-0.959467	down	--	--	Molecular Function: microfilament motor activity (GO:0000146);; Cellular Component: photoreceptor outer segment (GO:0001750);; Biological Process: phagolysosome assembly (GO:0001845);; Cellular Component: photoreceptor inner segment (GO:0001917);; Molecular Function: calmodulin binding (GO:0005516);; Molecular Function: ATP binding (GO:0005524);; Cellular Component: lysosomal membrane (GO:0005765…	K10359|0|bta:535092|K10359 myosin VII | (RefSeq) MYO7A; myosin VIIA	--	[N]	Cell motility	Myosin head (motor domain);; MyTH4 domain;; FERM central domain;; IQ calmodulin-binding motif;; FERM N-terminal domain	Unconventional myosin-VIIa (Fragment) OS=Sus scrofa OX=9823 GN=MYO7A PE=2 SV=1	Z	Cytoskeleton	PREDICTED: unconventional myosin-VIIa isoform X3 [Ovis aries musimon]	molecular function: catalytic activity (GO:0003824);; cellular component: cell (GO:0005623);; cellular component: organelle (GO:0043226);; cellular component: organelle part (GO:0044422);; cellular component: cell part (GO:0044464);; biological process: cellular process (GO:0009987);; biological process: cellular component organization or biogenesis (GO:0071840);; molecular function: binding (GO:…
NID1	72.6311	55.0605	69.6762	38.4801	36.6694	40.3769	55.9108	43.1021	40.0421	50.8471	32.9607	0.00438327	-0.625219	down	0.201868	-0.344077	normal	0.108895	-0.532305	normal	[G]	Carbohydrate transport and metabolism	Molecular Function: calcium ion binding (GO:0005509);; Molecular Function: collagen binding (GO:0005518);; Cellular Component: basal lamina (GO:0005605);; Biological Process: cell-matrix adhesion (GO:0007160);; Biological Process: positive regulation of cell-substrate adhesion (GO:0010811);; Biological Process: glomerular basement membrane development (GO:0032836);; Molecular Function: laminin-1 …	K06826|0|oas:101117471|K06826 nidogen (entactin) | (RefSeq) NID1; nidogen 1	--	[MW]	Cell wall/membrane/envelope biogenesis;; Extracellular structures	G2F domain;; Low-density lipoprotein receptor repeat class B;; EGF domain;; Nidogen-like;; Thyroglobulin type-1 repeat;; Calcium-binding EGF domain;; Complement Clr-like EGF-like;; Coagulation Factor Xa inhibitory site;; EGF-like domain	Pro-epidermal growth factor OS=Sus scrofa OX=9823 GN=EGF PE=1 SV=2	S	Function unknown	PREDICTED: nidogen-1 [Ovis aries musimon]	molecular function: binding (GO:0005488);; cellular component: extracellular region (GO:0005576);; cellular component: extracellular region part (GO:0044421);; biological process: biological adhesion (GO:0022610);; biological process: biological regulation (GO:0065007);; biological process: cellular process (GO:0009987);; biological process: developmental process (GO:0032502);; biological process…
NPAS2	0.700597	0.46213	0.652642	0.123695	0.136333	0.191463	0.324496	0.129132	0.58342	0.3964	0.45253	0.00260616	-1.11977	down	0.0670101	-0.799078	normal	0.789456	-0.196355	normal	[T]	Signal transduction mechanisms	Molecular Function: DNA binding (GO:0003677);; Molecular Function: transcription factor activity, sequence-specific DNA binding (GO:0003700);; Cellular Component: nucleus (GO:0005634);; Cellular Component: transcription factor complex (GO:0005667);; Cellular Component: cytoplasm (GO:0005737);; Biological Process: positive regulation of DNA repair (GO:0045739);; Biological Process: positive regula…	K09026|0|oas:101104647|K09026 neuronal PAS domain-containing protein 2 | (RefSeq) NPAS2; neuronal PAS domain protein 2	Circadian rhythm (ko04710)	[K]	Transcription	PAS domain;; PAS fold;; PAS fold;; Helix-loop-helix DNA-binding domain	Circadian locomoter output cycles protein kaput OS=Pongo abelii OX=9601 GN=CLOCK PE=2 SV=1	K	Transcription	PREDICTED: neuronal PAS domain-containing protein 2 isoform X5 [Ovis aries]	molecular function: binding (GO:0005488);; molecular function: nucleic acid binding transcription factor activity (GO:0001071);; biological process: biological regulation (GO:0065007);; cellular component: cell (GO:0005623);; cellular component: organelle (GO:0043226);; cellular component: cell part (GO:0044464);; cellular component: macromolecular complex (GO:0032991);; biological process: respo…
NREP	90.3244	73.3989	49.4404	27.1809	34.663	52.9247	22.6589	52.6187	31.504	43.9637	35.2431	0.0189538	-0.824724	down	0.571378	-0.366308	normal	0.0569034	-0.699052	normal	--	--	Biological Process: regulation of transforming growth factor beta receptor signaling pathway (GO:0017015);;	--	--	--	--	Neuronal protein 3.1 (p311)	Neuronal regeneration-related protein OS=Pongo abelii OX=9601 GN=NREP PE=3 SV=1	S	Function unknown	PREDICTED: neuronal regeneration-related protein-like [Lipotes vexillifer]	biological process: biological regulation (GO:0065007)
NRP2	4.98774	3.22372	3.96307	2.06893	2.24825	2.25193	2.58726	2.43347	1.83776	2.32166	2.44557	0.0420596	-0.658484	down	0.0746477	-0.53017	normal	0.0531425	-0.670204	normal	--	--	Biological Process: angiogenesis (GO:0001525);; Molecular Function: vascular endothelial growth factor-activated receptor activity (GO:0005021);; Biological Process: heart development (GO:0007507);; Cellular Component: integral component of membrane (GO:0016021);; Molecular Function: semaphorin receptor activity (GO:0017154);; Biological Process: facial nerve structural organization (GO:0021612);…	K06819|0|cfa:488487|K06819 neuropilin 2 | (RefSeq) NRP2; neuropilin 2	--	--	--	CUB domain;; F5/8 type C domain;; MAM domain, meprin/A5/mu	Coagulation factor VIII OS=Sus scrofa OX=9823 GN=F8 PE=1 SV=2	U	Intracellular trafficking, secretion, and vesicular transport	PREDICTED: neuropilin-2 isoform X3 [Ovis aries]	biological process: developmental process (GO:0032502);; biological process: single-organism process (GO:0044699);; molecular function: catalytic activity (GO:0003824);; molecular function: signal transducer activity (GO:0004871);; molecular function: molecular transducer activity (GO:0060089);; biological process: metabolic process (GO:0008152);; biological process: cellular process (GO:0009987)…
PEG10	2.25459	2.80576	2.4842	1.09354	1.20579	2.42107	2.89374	2.26106	1.38924	1.99462	1.80334	0.0396641	-0.766062	down	0.878186	0.111598	normal	0.468515	-0.369912	normal	--	--	Biological Process: placenta development (GO:0001890);; Molecular Function: nucleic acid binding (GO:0003676);; Cellular Component: nucleus (GO:0005634);; Cellular Component: cytoplasm (GO:0005737);; Molecular Function: zinc ion binding (GO:0008270);;	--	--	--	--	Retrotransposon gag protein;; Domain of unknown function (DUF4939);; Retroviral aspartyl protease	Retrotransposon-like protein 1 OS=Bos taurus OX=9913 GN=RTL1 PE=2 SV=2	S	Function unknown	retrotransposon-derived protein PEG10 [Ovis aries]	biological process: reproduction (GO:0000003);; biological process: reproductive process (GO:0022414);; biological process: multicellular organismal process (GO:0032501);; biological process: developmental process (GO:0032502);; biological process: single-organism process (GO:0044699);; molecular function: binding (GO:0005488);; cellular component: cell (GO:0005623);; cellular component: organell…
gene-PI16	24.4218	24.2857	21.1729	11.9001	17.1789	15.3221	21.8321	17.7787	11.6826	12.4144	16.1756	0.176298	-0.492731	normal	0.590974	-0.208221	normal	0.048186	-0.629094	down	[S]	Function unknown	Biological Process: negative regulation of peptidase activity (GO:0010466);; Cellular Component: integral component of membrane (GO:0016021);; Molecular Function: peptidase inhibitor activity (GO:0030414);; Cellular Component: extracellular exosome (GO:0070062);;	K20412|0|oas:101122471|K20412 peptidase inhibitor 16 | (RefSeq) PI16; peptidase inhibitor 16	--	[S]	Function unknown	Cysteine-rich secretory protein family	Peptidase inhibitor 16 OS=Bos taurus OX=9913 GN=PI16 PE=2 SV=1	S	Function unknown	PREDICTED: peptidase inhibitor 16 isoform X3 [Ovis aries musimon]	biological process: biological regulation (GO:0065007);; cellular component: membrane (GO:0016020);; cellular component: membrane part (GO:0044425);; molecular function: molecular function regulator (GO:0098772);; cellular component: extracellular region (GO:0005576);; cellular component: organelle (GO:0043226);; cellular component: extracellular region part (GO:0044421)
gene-PIEZO2	0.412882	0.24392	0.330151	0.188609	0.105232	0.199389	0.304329	0.152726	0.1252	0.128084	0.129574	0.305389	-0.574934	normal	0.6299	-0.31964	normal	0.030005	-0.861016	down	--	--	Molecular Function: mechanically-gated ion channel activity (GO:0008381);; Cellular Component: integral component of membrane (GO:0016021);; Biological Process: ion transmembrane transport (GO:0034220);;	--	--	[S]	Function unknown	Piezo non-specific cation channel, R-Ras-binding domain;; Piezo	--	S	Function unknown	PREDICTED: piezo-type mechanosensitive ion channel component 2 isoform X2 [Ovis aries]	molecular function: transporter activity (GO:0005215);; biological process: localization (GO:0051179);; cellular component: membrane (GO:0016020);; cellular component: membrane part (GO:0044425)
PLCB4	7.92907	7.18479	6.83393	3.76959	4.61378	4.79671	5.2565	6.4236	7.37234	5.2801	5.28848	0.017998	-0.613654	down	0.602983	-0.23873	normal	0.585846	-0.228116	normal	--	--	Molecular Function: phosphatidylinositol phospholipase C activity (GO:0004435);; Molecular Function: signal transducer activity (GO:0004871);; Molecular Function: calcium ion binding (GO:0005509);; Cellular Component: nucleus (GO:0005634);; Cellular Component: smooth endoplasmic reticulum (GO:0005790);; Cellular Component: postsynaptic density of dendrite (GO:0014069);; Biological Process: lipid …	K05858|0|chx:102180505|K05858 phosphatidylinositol phospholipase C, beta [EC:3.1.4.11] | (RefSeq) PLCB4; phospholipase C beta 4	Inositol phosphate metabolism (ko00562);; Rap1 signaling pathway (ko04015);; Calcium signaling pathway (ko04020);; cGMP-PKG signaling pathway (ko04022);; Chemokine signaling pathway (ko04062);; Phosphatidylinositol signaling system (ko04070);; Sphingolipid signaling pathway (ko04071);; Phospholipase D signaling pathway (ko04072);; Adrenergic signaling in cardiomyocytes (ko04261);; Vascular smooth…	[I]	Lipid transport and metabolism	Phosphatidylinositol-specific phospholipase C, X domain;; Phosphatidylinositol-specific phospholipase C, Y domain;; Protein of unknown function (DUF1154);; Phosphoinositide-specific phospholipase C, efhand-like;; C2 domain	1-phosphatidylinositol 4,5-bisphosphate phosphodiesterase beta-4 (Fragment) OS=Bos taurus OX=9913 GN=PLCB4 PE=1 SV=1	S	Function unknown	PREDICTED: 1-phosphatidylinositol 4,5-bisphosphate phosphodiesterase beta-4 isoform X7 [Ovis aries]	molecular function: catalytic activity (GO:0003824);; molecular function: signal transducer activity (GO:0004871);; molecular function: binding (GO:0005488);; cellular component: cell (GO:0005623);; cellular component: organelle (GO:0043226);; cellular component: cell part (GO:0044464);; cellular component: synapse part (GO:0044456);; cellular component: synapse (GO:0045202);; biological process:…
PLXDC2	4.87471	5.36502	5.93062	2.95955	2.22974	3.69678	3.94452	2.94109	4.04902	3.17071	2.46835	0.00864429	-0.776555	down	0.209731	-0.419796	normal	0.0718842	-0.593183	normal	[O]	Posttranslational modification, protein turnover, chaperones	Cellular Component: integral component of membrane (GO:0016021);; Cellular Component: extracellular exosome (GO:0070062);;	--	--	[W]	Extracellular structures	Plexin repeat	--	S	Function unknown	plexin domain-containing protein 2 isoform X1 [Odocoileus virginianus texanus]	cellular component: membrane (GO:0016020);; cellular component: membrane part (GO:0044425);; cellular component: extracellular region (GO:0005576);; cellular component: organelle (GO:0043226);; cellular component: extracellular region part (GO:0044421)
gene-PLXND1	8.22176	7.1276	7.40544	4.80656	4.56321	5.09853	5.78281	4.8818	3.71212	4.33527	4.09482	0.0218831	-0.529368	normal	0.139718	-0.366396	normal	0.000521413	-0.764145	down	[MU]	Cell wall/membrane/envelope biogenesis;; Intracellular trafficking, secretion, and vesicular transport	Biological Process: branching involved in blood vessel morphogenesis (GO:0001569);; Cellular Component: semaphorin receptor complex (GO:0002116);; Biological Process: outflow tract morphogenesis (GO:0003151);; Biological Process: cardiac septum development (GO:0003279);; Cellular Component: integral component of plasma membrane (GO:0005887);; Biological Process: synapse assembly (GO:0007416);; Mo…	K06822|0|bta:781625|K06822 plexin D | (RefSeq) PLXND1; plexin D1	--	[T]	Signal transduction mechanisms	Plexin cytoplasmic RasGAP domain;; Sema domain;; IPT/TIG domain;; Plexin repeat	Hepatocyte growth factor receptor OS=Mustela putorius furo OX=9669 GN=MET PE=3 SV=1	U	Intracellular trafficking, secretion, and vesicular transport	PREDICTED: plexin-D1 isoform X2 [Ovis aries musimon]	biological process: multicellular organismal process (GO:0032501);; biological process: developmental process (GO:0032502);; biological process: single-organism process (GO:0044699);; cellular component: macromolecular complex (GO:0032991);; cellular component: cell (GO:0005623);; cellular component: membrane (GO:0016020);; cellular component: membrane part (GO:0044425);; cellular component: cell…
gene-PMP22	20.2131	18.1714	20.6302	16.6055	14.6596	13.5311	17.6119	19.2206	12.7663	11.7154	12.3307	0.640369	-0.203327	normal	0.887401	-0.0873905	normal	0.00537542	-0.591062	down	--	--	Cellular Component: plasma membrane (GO:0005886);; Biological Process: cell cycle arrest (GO:0007050);; Biological Process: cell death (GO:0008219);; Cellular Component: integral component of membrane (GO:0016021);; Biological Process: bleb assembly (GO:0032060);;	K19289|2.45468e-75|oas:100302348|K19289 peripheral myelin protein 22 | (RefSeq) PMP22; peripheral myelin protein 22	--	--	--	PMP-22/EMP/MP20/Claudin family;; PMP-22/EMP/MP20/Claudin tight junction	Peripheral myelin protein 22 OS=Bos taurus OX=9913 GN=PMP22 PE=1 SV=2	U	Intracellular trafficking, secretion, and vesicular transport	peripheral myelin protein 22 [Ovis aries]	cellular component: cell (GO:0005623);; cellular component: membrane (GO:0016020);; cellular component: cell part (GO:0044464);; biological process: cellular process (GO:0009987);; biological process: single-organism process (GO:0044699);; biological process: biological regulation (GO:0065007);; cellular component: membrane part (GO:0044425);; biological process: cellular component organization o…
PPP1R18	4.64949	3.787	4.98223	2.52449	2.58115	3.68687	3.49449	3.61993	3.00133	3.77136	2.64262	0.045251	-0.5966	down	0.803788	-0.142391	normal	0.342035	-0.384151	normal	--	--	Molecular Function: phosphatase binding (GO:0019902);;	K17559|0|oas:101109918|K17559 phostensin | (RefSeq) PPP1R18; protein phosphatase 1 regulatory subunit 18	--	--	--	Phostensin PP1-binding and SH3-binding region;; PP1-regulatory protein, Phostensin N-terminal	Phostensin OS=Sus scrofa OX=9823 GN=PPP1R18 PE=3 SV=1	T	Signal transduction mechanisms	PREDICTED: phostensin isoform X2 [Ovis aries musimon]	molecular function: binding (GO:0005488)
PTPRK	2.12362	2.00783	2.96334	1.08104	0.984925	0.981155	3.63773	1.69449	1.16985	1.69047	2.31463	0.0252869	-0.74368	down	0.968145	-0.0419223	normal	0.653861	-0.26466	normal	[T]	Signal transduction mechanisms	Cellular Component: photoreceptor outer segment (GO:0001750);; Molecular Function: protein tyrosine phosphatase activity (GO:0004725);; Cellular Component: cell-cell junction (GO:0005911);; Biological Process: transforming growth factor beta receptor signaling pathway (GO:0007179);; Molecular Function: beta-catenin binding (GO:0008013);; Cellular Component: cell surface (GO:0009986);; Biological …	K06776|0|bom:102284887|K06776 receptor-type tyrosine-protein phosphatase kappa [EC:3.1.3.48] | (RefSeq) PTPRK; protein tyrosine phosphatase, receptor type K	--	[T]	Signal transduction mechanisms	Protein-tyrosine phosphatase;; MAM domain, meprin/A5/mu;; Fibronectin type III domain;; Dual specificity phosphatase, catalytic domain;; Immunoglobulin I-set domain;; Immunoglobulin domain	Receptor-type tyrosine-protein phosphatase F OS=Bos taurus OX=9913 GN=PTPRF PE=2 SV=1	T	Signal transduction mechanisms	PREDICTED: receptor-type tyrosine-protein phosphatase kappa isoform X14 [Ovis aries musimon]	cellular component: cell (GO:0005623);; cellular component: organelle (GO:0043226);; cellular component: organelle part (GO:0044422);; cellular component: cell part (GO:0044464);; molecular function: catalytic activity (GO:0003824);; biological process: metabolic process (GO:0008152);; biological process: cellular process (GO:0009987);; cellular component: cell junction (GO:0030054);; biological …
RASAL2	3.95202	2.74719	3.79588	1.72817	1.97906	1.79644	2.76764	1.78218	2.58198	3.05393	2.84731	0.0161819	-0.693628	down	0.0887742	-0.521677	normal	0.63153	-0.22445	normal	--	--	Molecular Function: GTPase activator activity (GO:0005096);; Cellular Component: cytoplasm (GO:0005737);; Cellular Component: intrinsic component of the cytoplasmic side of the plasma membrane (GO:0031235);; Biological Process: positive regulation of GTPase activity (GO:0043547);; Biological Process: negative regulation of Ras protein signal transduction (GO:0046580);;	K17633|0|chx:102184177|K17633 RAS protein activator-like 2 | (RefSeq) RASAL2; RAS protein activator like 2	Ras signaling pathway (ko04014)	[R]	General function prediction only	Domain of unknown function (DUF3498);; GTPase-activator protein for Ras-like GTPase;; C2 domain;; Domain of unknown function (DUF3498)	RAS protein activator like-3 OS=Bos taurus OX=9913 GN=RASAL3 PE=2 SV=1	S	Function unknown	PREDICTED: ras GTPase-activating protein nGAP isoform X2 [Ovis aries musimon]	molecular function: molecular function regulator (GO:0098772);; biological process: biological regulation (GO:0065007);; cellular component: cell (GO:0005623);; cellular component: cell part (GO:0044464);; cellular component: membrane (GO:0016020);; cellular component: membrane part (GO:0044425)
RASD2	3.29916	3.41893	3.04876	1.40298	1.74619	2.19211	2.2715	2.38332	3.60325	2.72362	2.011	0.0144369	-0.766211	down	0.453671	-0.323421	normal	0.799168	-0.161856	normal	[R]	General function prediction only	Biological Process: synaptic transmission, dopaminergic (GO:0001963);; Molecular Function: GTP binding (GO:0005525);; Cellular Component: intracellular (GO:0005622);; Biological Process: small GTPase mediated signal transduction (GO:0007264);; Biological Process: locomotory behavior (GO:0007626);; Cellular Component: membrane (GO:0016020);; Molecular Function: G-protein beta-subunit binding (GO:0…	K07844|0|nle:100587400|K07844 RASD family, member 2 | (RefSeq) RASD2; RASD family member 2	--	[R]	General function prediction only	Ras family;; Ras of Complex, Roc, domain of DAPkinase;; ADP-ribosylation factor family	GTP-binding protein Di-Ras2 OS=Pongo abelii OX=9601 GN=DIRAS2 PE=2 SV=1	S	Function unknown	GTP-binding protein Rhes, partial [Bos mutus]	biological process: cellular process (GO:0009987);; biological process: signaling (GO:0023052);; biological process: single-organism process (GO:0044699);; molecular function: binding (GO:0005488);; cellular component: cell (GO:0005623);; cellular component: cell part (GO:0044464);; biological process: response to stimulus (GO:0050896);; biological process: biological regulation (GO:0065007);; bi…
RELN	0.742132	0.517789	0.676069	0.274145	0.342661	0.3268	0.644993	0.651507	0.347268	0.344587	0.688598	0.044384	-0.732024	down	0.919594	-0.0959153	normal	0.653181	-0.283828	normal	[S]	Function unknown	Molecular Function: protein serine/threonine/tyrosine kinase activity (GO:0004712);; Cellular Component: proteinaceous extracellular matrix (GO:0005578);; Cellular Component: extracellular space (GO:0005615);; Cellular Component: cytoplasm (GO:0005737);; Cellular Component: plasma membrane (GO:0005886);; Biological Process: proteolysis (GO:0006508);; Biological Process: cell adhesion (GO:0007155)…	K06249|0|oas:101120658|K06249 reelin [EC:3.4.21.-] | (RefSeq) RELN; reelin	PI3K-Akt signaling pathway (ko04151);; Focal adhesion (ko04510);; ECM-receptor interaction (ko04512)	--	--	BNR/Asp-box repeat;; EGF-like domain;; Reeler domain	Reelin (Fragment) OS=Bos taurus OX=9913 GN=RELN PE=2 SV=1	O	Posttranslational modification, protein turnover, chaperones	PREDICTED: reelin isoform X2 [Ovis aries]	molecular function: catalytic activity (GO:0003824);; biological process: metabolic process (GO:0008152);; biological process: cellular process (GO:0009987);; cellular component: extracellular region (GO:0005576);; cellular component: extracellular region part (GO:0044421);; cellular component: cell (GO:0005623);; cellular component: cell part (GO:0044464);; cellular component: membrane (GO:00160…
gene-SERPINF1	41.7947	40.0405	44.8315	24.7951	36.7896	23.3517	41.239	36.5646	25.2426	23.9057	19.3247	0.516813	-0.298605	normal	0.728468	-0.179939	normal	0.000113479	-0.769288	down	[O]	Posttranslational modification, protein turnover, chaperones	Molecular Function: serine-type endopeptidase inhibitor activity (GO:0004867);; Cellular Component: extracellular space (GO:0005615);; Biological Process: negative regulation of endopeptidase activity (GO:0010951);; Biological Process: negative regulation of angiogenesis (GO:0016525);; Cellular Component: extracellular matrix (GO:0031012);; Cellular Component: melanosome (GO:0042470);; Biological…	K19614|0|chx:102179233|K19614 pigment epithelium-derived factor | (RefSeq) SERPINF1; serpin family F member 1	Wnt signaling pathway (ko04310)	[V]	Defense mechanisms	Serpin (serine protease inhibitor)	Pigment epithelium-derived factor OS=Bos taurus OX=9913 GN=SERPINF1 PE=1 SV=1	O	Posttranslational modification, protein turnover, chaperones	PREDICTED: pigment epithelium-derived factor [Capra hircus]	molecular function: molecular function regulator (GO:0098772);; biological process: biological regulation (GO:0065007);; cellular component: extracellular region (GO:0005576);; cellular component: extracellular region part (GO:0044421);; cellular component: cell (GO:0005623);; cellular component: organelle (GO:0043226);; cellular component: cell part (GO:0044464);; biological process: cellular pr…
SP1	11.1057	9.7612	12.8633	5.12174	7.37907	8.93758	11.4822	10.5951	10.219	8.34225	8.74312	0.0439216	-0.626091	down	0.980585	0.0145983	normal	0.491834	-0.235903	normal	[R]	General function prediction only	Cellular Component: nuclear chromatin (GO:0000790);; Molecular Function: RNA polymerase II core promoter proximal region sequence-specific DNA binding (GO:0000978);; Molecular Function: transcription factor activity, RNA polymerase II core promoter proximal region sequence-specific binding (GO:0000982);; Cellular Component: nucleoplasm (GO:0005654);; Molecular Function: protein C-terminus binding…	K04684|0|oas:101104139|K04684 transcription factor Sp1 | (RefSeq) SP1; Sp1 transcription factor	Endocrine resistance (ko01522);; TGF-beta signaling pathway (ko04350);; Estrogen signaling pathway (ko04915);; Huntington's disease (ko05016);; Transcriptional misregulation in cancer (ko05202);; Choline metabolism in cancer (ko05231)	[R]	General function prediction only	Zinc-finger double domain;; Zinc finger, C2H2 type;; C2H2-type zinc finger	Transcription factor Sp2 OS=Bos taurus OX=9913 GN=SP2 PE=2 SV=1	S	Function unknown	transcription factor Sp1 isoform X1 [Odocoileus virginianus texanus]	cellular component: cell (GO:0005623);; cellular component: membrane-enclosed lumen (GO:0031974);; cellular component: organelle (GO:0043226);; cellular component: organelle part (GO:0044422);; cellular component: cell part (GO:0044464);; molecular function: binding (GO:0005488);; molecular function: nucleic acid binding transcription factor activity (GO:0001071);; biological process: biological …
SRGAP2	3.60184	3.6162	3.56875	2.00157	2.23642	2.59284	2.77162	2.04483	2.39448	2.83306	2.02032	0.014119	-0.590141	down	0.344481	-0.325955	normal	0.209088	-0.465069	normal	--	--	Molecular Function: GTPase activator activity (GO:0005096);; Cellular Component: nucleoplasm (GO:0005654);; Cellular Component: mitochondrial inner membrane (GO:0005743);; Cellular Component: cytosol (GO:0005829);; Biological Process: signal transduction (GO:0007165);; Cellular Component: postsynaptic density of dendrite (GO:0014069);; Biological Process: extension of a leading process involved i…	K07526|0|chx:102174862|K07526 SLIT-ROBO Rho GTPase activating protein | (RefSeq) SRGAP2; SLIT-ROBO Rho GTPase activating protein 2	Axon guidance (ko04360)	[Z]	Cytoskeleton	RhoGAP domain;; Fes/CIP4, and EFC/F-BAR homology domain;; SH3 domain;; Variant SH3 domain;; Variant SH3 domain	N-chimaerin OS=Bos taurus OX=9913 GN=CHN1 PE=2 SV=1	Z	Cytoskeleton	PREDICTED: SLIT-ROBO Rho GTPase-activating protein 2 isoform X3 [Ovis aries musimon]	molecular function: molecular function regulator (GO:0098772);; biological process: biological regulation (GO:0065007);; cellular component: cell (GO:0005623);; cellular component: organelle (GO:0043226);; cellular component: organelle part (GO:0044422);; cellular component: cell part (GO:0044464);; cellular component: membrane (GO:0016020);; biological process: cellular process (GO:0009987);; ce…
STAB1	3.84177	2.74532	3.65372	1.80069	1.91958	2.39334	3.02779	2.81555	2.76354	2.65657	2.06041	0.0172422	-0.655054	down	0.747189	-0.157291	normal	0.342035	-0.353223	normal	[R]	General function prediction only	Molecular Function: low-density lipoprotein receptor activity (GO:0005041);; Molecular Function: scavenger receptor activity (GO:0005044);; Molecular Function: calcium ion binding (GO:0005509);; Molecular Function: hyaluronic acid binding (GO:0005540);; Cellular Component: integral component of plasma membrane (GO:0005887);; Biological Process: receptor-mediated endocytosis (GO:0006898);; Biologi…	K19020|0|phd:102325656|K19020 stabilin-1 | (RefSeq) STAB1; stabilin 1	--	[T]	Signal transduction mechanisms	Fasciclin domain;; EGF domain;; Extracellular link domain	Tumor necrosis factor-inducible gene 6 protein OS=Oryctolagus cuniculus OX=9986 GN=TNFAIP6 PE=2 SV=1	S	Function unknown	PREDICTED: stabilin-1 isoform X2 [Ovis aries musimon]	molecular function: molecular transducer activity (GO:0060089);; biological process: localization (GO:0051179);; molecular function: binding (GO:0005488);; cellular component: cell (GO:0005623);; cellular component: membrane (GO:0016020);; cellular component: membrane part (GO:0044425);; cellular component: cell part (GO:0044464);; biological process: biological adhesion (GO:0022610);; biological…
SVEP1	2.25867	2.01885	2.16246	1.23027	1.01886	1.42088	2.08416	1.67118	1.56065	1.94435	1.7452	0.00460294	-0.713964	down	0.667565	-0.17386	normal	0.618398	-0.216189	normal	[U]	Intracellular trafficking, secretion, and vesicular transport	Molecular Function: chromatin binding (GO:0003682);; Molecular Function: calcium ion binding (GO:0005509);;	K17495|0|oas:101113459|K17495 CUB and sushi domain-containing protein | (RefSeq) SVEP1; sushi, von Willebrand factor type A, EGF and pentraxin domain containing 1	--	[T]	Signal transduction mechanisms	Sushi repeat (SCR repeat);; Putative ephrin-receptor like;; EGF-like domain;; von Willebrand factor type A domain;; HYR domain;; Human growth factor-like EGF;; Pentaxin family;; Concanavalin A-like lectin/glucanases superfamily;; EGF-like domain;; von Willebrand factor type A domain;; Calcium-binding EGF domain	Complement factor H OS=Bos taurus OX=9913 GN=CFH PE=1 SV=3	S	Function unknown	PREDICTED: sushi, von Willebrand factor type A, EGF and pentraxin domain-containing protein 1 isoform X1 [Ovis aries musimon]	molecular function: binding (GO:0005488)
TBC1D5	4.38868	4.49628	4.78075	2.46942	2.73143	3.49546	3.18231	3.66779	3.72115	3.66567	2.67869	0.0333669	-0.59045	down	0.636002	-0.22782	normal	0.370217	-0.344038	normal	--	--	Biological Process: positive regulation of receptor internalization (GO:0002092);; Molecular Function: GTPase activator activity (GO:0005096);; Cellular Component: autophagosome (GO:0005776);; Cellular Component: cytosol (GO:0005829);; Biological Process: intracellular protein transport (GO:0006886);; Cellular Component: endosome membrane (GO:0010008);; Biological Process: positive regulation of …	K18469|0|bacu:103013482|K18469 TBC1 domain family member 5 | (RefSeq) TBC1D5; TBC1 domain family member 5	--	[U]	Intracellular trafficking, secretion, and vesicular transport	Rab-GTPase-TBC domain	--	S	Function unknown	PREDICTED: TBC1 domain family member 5 isoform X2 [Ovis aries musimon]	biological process: biological regulation (GO:0065007);; molecular function: molecular function regulator (GO:0098772);; cellular component: cell (GO:0005623);; cellular component: organelle (GO:0043226);; cellular component: cell part (GO:0044464);; biological process: localization (GO:0051179);; cellular component: membrane (GO:0016020);; cellular component: organelle part (GO:0044422);; molecu…
TMEM200B	2.15984	1.81133	1.93982	0.908235	0.806226	1.13419	1.69356	1.55917	1.38169	1.83211	0.632889	0.023475	-0.80696	down	0.671934	-0.243261	normal	0.553639	-0.356864	normal	--	--	Cellular Component: integral component of membrane (GO:0016021);;	--	--	[S]	Function unknown	Uncharacterised conserved protein (DUF2371)	--	S	Function unknown	PREDICTED: transmembrane protein 200B isoform X1 [Bos taurus]	cellular component: membrane (GO:0016020);; cellular component: membrane part (GO:0044425)
gene-TMTC2	1.9946	1.53631	1.76326	0.727674	1.165	0.953194	1.0586	0.92912	1.41779	1.24846	0.763736	0.165835	-0.599227	normal	0.0289644	-0.613716	down	0.306154	-0.453434	normal	[R]	General function prediction only	Molecular Function: mannosyltransferase activity (GO:0000030);; Cellular Component: endoplasmic reticulum membrane (GO:0005789);; Biological Process: protein O-linked glycosylation (GO:0006493);; Cellular Component: integral component of membrane (GO:0016021);; Biological Process: calcium ion homeostasis (GO:0055074);; Biological Process: mannosylation (GO:0097502);;	--	--	[R]	General function prediction only	Tetratricopeptide repeat;; Tetratricopeptide repeat;; Domain of unknown function (DUF1736);; Tetratricopeptide repeat;; Tetratricopeptide repeat;; Tetratricopeptide repeat;; TPR repeat;; Tetratricopeptide repeat;; Tetratricopeptide repeat;; Tetratricopeptide repeat;; Tetratricopeptide repeat;; Tetratricopeptide repeat;; Tetratricopeptide repeat;; Tetratricopeptide repeat;; Tetratricopeptide repeat	UDP-N-acetylglucosamine--peptide N-acetylglucosaminyltransferase 110 kDa subunit OS=Sus scrofa OX=9823 GN=OGT PE=2 SV=1	S	Function unknown	PREDICTED: transmembrane and TPR repeat-containing protein 2 [Capra hircus]	molecular function: catalytic activity (GO:0003824);; cellular component: cell (GO:0005623);; cellular component: membrane (GO:0016020);; cellular component: organelle (GO:0043226);; cellular component: organelle part (GO:0044422);; cellular component: membrane part (GO:0044425);; cellular component: cell part (GO:0044464);; biological process: metabolic process (GO:0008152);; biological process:…
gene-TP53INP1	7.16996	5.21671	8.02942	4.39006	5.12597	3.77154	7.44957	3.1859	5.23765	4.44191	4.09045	0.886612	-0.152718	normal	0.00152649	-0.830399	down	0.22331	-0.457377	normal	--	--	Biological Process: autophagosome assembly (GO:0000045);; Cellular Component: nucleus (GO:0005634);; Cellular Component: autophagosome (GO:0005776);; Cellular Component: cytosol (GO:0005829);; Biological Process: cell cycle arrest (GO:0007050);; Biological Process: negative regulation of cell proliferation (GO:0008285);; Biological Process: response to heat (GO:0009408);; Biological Process: posi…	K15310|3.60165e-146|phd:102330506|K15310 tumor protein p53-inducible nuclear protein 1 | (RefSeq) TP53INP1; tumor protein p53 inducible nuclear protein 1	HTLV-I infection (ko05166)	--	--	DOR family	--	K	Transcription	PREDICTED: tumor protein p53-inducible nuclear protein 1 isoform X1 [Pantholops hodgsonii]	biological process: metabolic process (GO:0008152);; biological process: cellular process (GO:0009987);; biological process: cellular component organization or biogenesis (GO:0071840);; cellular component: cell (GO:0005623);; cellular component: organelle (GO:0043226);; cellular component: cell part (GO:0044464);; biological process: single-organism process (GO:0044699);; biological process: biol…
ZBTB20	2.34427	3.06675	2.54402	1.48567	0.724171	2.29015	2.52772	2.35959	2.07272	2.1732	2.91787	0.0325289	-0.786289	down	0.732019	-0.145029	normal	0.706245	-0.200666	normal	--	--	Biological Process: negative regulation of transcription from RNA polymerase II promoter (GO:0000122);; Molecular Function: transcriptional repressor activity, RNA polymerase II core promoter proximal region sequence-specific binding (GO:0001078);; Molecular Function: DNA binding (GO:0003677);; Cellular Component: nucleoplasm (GO:0005654);; Biological Process: positive regulation of interferon-be…	K10501|0|chx:102174975|K10501 zinc finger and BTB domain-containing protein 20 | (RefSeq) ZBTB20; zinc finger and BTB domain containing 20	--	[R]	General function prediction only	BTB/POZ domain;; Zinc finger, C2H2 type;; Zinc-finger double domain;; C2H2-type zinc finger;; Zinc-finger of C2H2 type;; C2H2-type zinc finger	Zinc finger protein 182 OS=Pongo abelii OX=9601 GN=ZNF182 PE=2 SV=1	S	Function unknown	PREDICTED: zinc finger and BTB domain-containing protein 20 isoform X1 [Odobenus rosmarus divergens]	biological process: biological regulation (GO:0065007);; molecular function: nucleic acid binding transcription factor activity (GO:0001071);; molecular function: binding (GO:0005488);; cellular component: cell (GO:0005623);; cellular component: organelle (GO:0043226);; cellular component: organelle part (GO:0044422);; cellular component: cell part (GO:0044464)
ZDHHC14	1.81827	0.922885	1.27384	0.334127	0.4231	0.482456	0.6973	1.25504	0.802339	0.994788	0.422511	0.0205309	-0.939621	down	0.6411	-0.332076	normal	0.386323	-0.473694	normal	--	--	Cellular Component: endoplasmic reticulum (GO:0005783);; Molecular Function: zinc ion binding (GO:0008270);; Cellular Component: integral component of membrane (GO:0016021);; Biological Process: protein palmitoylation (GO:0018345);; Molecular Function: protein-cysteine S-palmitoyltransferase activity (GO:0019706);;	K16675|0|bta:517451|K16675 palmitoyltransferase ZDHHC9/14/18 [EC:2.3.1.225] | (RefSeq) ZDHHC14; zinc finger DHHC-type containing 14	--	[R]	General function prediction only	DHHC palmitoyltransferase	Palmitoyltransferase ZDHHC9 OS=Bos taurus OX=9913 GN=ZDHHC9 PE=2 SV=1	S	Function unknown	PREDICTED: probable palmitoyltransferase ZDHHC14 isoform X2 [Ovis aries musimon]	cellular component: cell (GO:0005623);; cellular component: organelle (GO:0043226);; cellular component: cell part (GO:0044464);; molecular function: binding (GO:0005488);; cellular component: membrane (GO:0016020);; cellular component: membrane part (GO:0044425);; biological process: metabolic process (GO:0008152);; biological process: cellular process (GO:0009987);; molecular function: catalyti…

## Sheet: cluster7
#ID
Ovis_aries_newGene_26586	908.123	1060.97	1722	1013.88	872.452	208.258	620.29	580.711	640.709	348.156	1205.77	0.809369	-0.199357	normal	0.00193428	-1.05645	down	0.494889	-0.400045	normal	[C]	Energy production and conversion	Molecular Function: cytochrome-c oxidase activity (GO:0004129);; Molecular Function: peroxidase activity (GO:0004601);; Molecular Function: prostaglandin-endoperoxide synthase activity (GO:0004666);; Molecular Function: iron ion binding (GO:0005506);; Cellular Component: nucleus (GO:0005634);; Cellular Component: mitochondrial respiratory chain complex IV (GO:0005751);; Cellular Component: endopl…	K02256|0|oas:808251|K02256 cytochrome c oxidase subunit 1 [EC:1.9.3.1] | (RefSeq) COX1, COI; cytochrome c oxidase subunit I	Oxidative phosphorylation (ko00190);; Cardiac muscle contraction (ko04260);; Non-alcoholic fatty liver disease (NAFLD) (ko04932);; Alzheimer's disease (ko05010);; Parkinson's disease (ko05012);; Huntington's disease (ko05016)	[C]	Energy production and conversion	NADH-ubiquinone/plastoquinone oxidoreductase chain 4L;; NADH dehydrogenase;; Cytochrome c oxidase subunit III;; Cytochrome C oxidase subunit II, transmembrane domain	Cytochrome c oxidase subunit 1 OS=Ovis aries OX=9940 GN=MT-CO1 PE=1 SV=1	C	Energy production and conversion	cytochrome c oxidase subunit I (mitochondrion) [Tragelaphus scriptus]	molecular function: catalytic activity (GO:0003824);; molecular function: transporter activity (GO:0005215);; molecular function: electron carrier activity (GO:0009055);; biological process: metabolic process (GO:0008152);; biological process: single-organism process (GO:0044699);; biological process: localization (GO:0051179);; molecular function: antioxidant activity (GO:0016209);; biological p…
Ovis_aries_newGene_66	0.976432	4.51898	4.76722	2.36678	0.190197	0.121341	0	0.082719	0.074442	0.535541	2.15735	0.675912	-0.270559	normal	7.98e-05	-1.2846	down	0.626046	-0.213018	normal	--	--	Biological Process: regulation of cell growth (GO:0001558);; Molecular Function: fibronectin binding (GO:0001968);; Biological Process: female pregnancy (GO:0007565);; Biological Process: regulation of glucose metabolic process (GO:0010906);; Biological Process: negative regulation of smooth muscle cell migration (GO:0014912);; Biological Process: negative regulation of translation (GO:0017148);;…	--	--	--	--	--	Insulin-like growth factor-binding protein 5 OS=Bos taurus OX=9913 GN=IGFBP5 PE=2 SV=2	S	Function unknown	insulin-like growth factor-binding protein 5, partial [Bos taurus]	biological process: biological regulation (GO:0065007);; molecular function: binding (GO:0005488);; biological process: reproduction (GO:0000003);; biological process: reproductive process (GO:0022414);; biological process: multicellular organismal process (GO:0032501);; biological process: multi-organism process (GO:0051704);; biological process: developmental process (GO:0032502);; biological p…
gene-ADGRL4	9.30195	8.31619	6.63952	5.1805	6.19048	2.95344	4.81074	2.92265	6.66339	6.41251	4.97629	0.486164	-0.334143	normal	0.00045234	-0.905015	down	0.416095	-0.333584	normal	--	--	Molecular Function: G-protein coupled receptor activity (GO:0004930);; Molecular Function: calcium ion binding (GO:0005509);; Biological Process: cell surface receptor signaling pathway (GO:0007166);; Biological Process: G-protein coupled receptor signaling pathway (GO:0007186);; Cellular Component: integral component of membrane (GO:0016021);;	K04595|0|oas:101103604|K04595 latrophilin and seven transmembrane domain containing 1 | (RefSeq) ADGRL4, ELTD1; adhesion G protein-coupled receptor L4	--	[T]	Signal transduction mechanisms	7 transmembrane receptor (Secretin family);; GPCR-Autoproteolysis INducing (GAIN) domain;; GPCR proteolysis site, GPS, motif;; Calcium-binding EGF domain	Adhesion G protein-coupled receptor L3 OS=Bos taurus OX=9913 GN=ADGRL3 PE=2 SV=1	S	Function unknown	PREDICTED: adhesion G protein-coupled receptor L4 [Ovis aries]	molecular function: signal transducer activity (GO:0004871);; molecular function: molecular transducer activity (GO:0060089);; biological process: cellular process (GO:0009987);; biological process: signaling (GO:0023052);; biological process: single-organism process (GO:0044699);; biological process: response to stimulus (GO:0050896);; biological process: biological regulation (GO:0065007);; mol…
gene-BMP1	6.90442	5.19226	4.80293	4.10472	3.54097	1.61881	3.6501	1.98305	3.63876	3.62525	4.69777	0.474523	-0.358878	normal	0.00737734	-0.866712	down	0.407187	-0.366386	normal	[NW]	Cell motility;; Extracellular structures	Molecular Function: metalloendopeptidase activity (GO:0004222);; Molecular Function: cytokine activity (GO:0005125);; Molecular Function: transforming growth factor beta receptor binding (GO:0005160);; Molecular Function: calcium ion binding (GO:0005509);; Cellular Component: extracellular space (GO:0005615);; Biological Process: proteolysis (GO:0006508);; Molecular Function: zinc ion binding (GO…	K05502|0|oas:101122334|K05502 bone morphogenetic protein 1 [EC:3.4.24.19] | (RefSeq) BMP1; bone morphogenetic protein 1	--	[O]	Posttranslational modification, protein turnover, chaperones	CUB domain;; Astacin (Peptidase family M12A);; Coagulation Factor Xa inhibitory site;; Calcium-binding EGF domain;; Complement Clr-like EGF-like;; EGF-like domain	Cubilin OS=Canis lupus familiaris OX=9615 GN=CUBN PE=1 SV=1	O	Posttranslational modification, protein turnover, chaperones	PREDICTED: bone morphogenetic protein 1 isoform X1 [Ovis aries]	molecular function: catalytic activity (GO:0003824);; biological process: metabolic process (GO:0008152);; molecular function: binding (GO:0005488);; cellular component: extracellular region (GO:0005576);; cellular component: extracellular region part (GO:0044421);; biological process: biological regulation (GO:0065007);; biological process: cellular process (GO:0009987);; biological process: sig…
gene-C1QTNF3	12.2845	9.04932	9.91501	8.03979	5.79327	4.57309	3.81494	3.49342	6.08551	6.53991	6.59671	0.406215	-0.390853	normal	1.13e-05	-1.0541	down	0.0609381	-0.560664	normal	--	--	Cellular Component: extracellular region (GO:0005576);; Cellular Component: collagen trimer (GO:0005581);;	--	--	--	--	C1q domain;; Collagen triple helix repeat (20 copies)	Complement C1q and tumor necrosis factor-related protein 9 OS=Bos taurus OX=9913 GN=C1QTNF9 PE=2 SV=1	S	Function unknown	PREDICTED: complement C1q tumor necrosis factor-related protein 3 isoform X1 [Ovis aries]	cellular component: extracellular region (GO:0005576);; cellular component: macromolecular complex (GO:0032991)
gene-C1QTNF6	7.83822	5.22507	3.62383	2.46975	3.91105	1.16397	3.10601	1.22736	2.81884	3.13807	3.95924	0.469081	-0.444364	normal	0.00998383	-0.970912	down	0.301233	-0.494114	normal	--	--	Cellular Component: collagen trimer (GO:0005581);; Cellular Component: extracellular space (GO:0005615);; Molecular Function: identical protein binding (GO:0042802);; Biological Process: protein heterotrimerization (GO:0070208);;	K19470|1.25187e-162|oas:101102801|K19470 complement C1q tumor necrosis factor-related protein 6 | (RefSeq) C1QTNF6; C1q and tumor necrosis factor related protein 6	--	--	--	C1q domain;; Collagen triple helix repeat (20 copies)	Adiponectin OS=Bos taurus OX=9913 GN=ADIPOQ PE=1 SV=1	S	Function unknown	PREDICTED: complement C1q tumor necrosis factor-related protein 6 [Ovis aries]	cellular component: macromolecular complex (GO:0032991);; cellular component: extracellular region (GO:0005576);; cellular component: extracellular region part (GO:0044421);; molecular function: binding (GO:0005488);; biological process: cellular process (GO:0009987);; biological process: cellular component organization or biogenesis (GO:0071840)
gene-CD93	45.9809	43.3102	32.927	19.5249	32.9549	14.3622	18.1311	14.313	20.681	34.2298	18.4617	0.440495	-0.407467	normal	1.22e-07	-1.10794	down	0.225285	-0.526319	normal	--	--	Molecular Function: complement component C1q binding (GO:0001849);; Biological Process: positive regulation of defense response to virus by host (GO:0002230);; Molecular Function: calcium ion binding (GO:0005509);; Cellular Component: plasma membrane (GO:0005886);; Cellular Component: cell surface (GO:0009986);; Cellular Component: integral component of membrane (GO:0016021);; Biological Process:…	K06702|0|chx:102172076|K06702 CDW93 antigen | (RefSeq) CD93; CD93 molecule	--	--	--	Complement Clr-like EGF-like;; Calcium-binding EGF domain;; Coagulation Factor Xa inhibitory site;; Lectin C-type domain;; EGF-like domain	Thrombomodulin OS=Canis lupus familiaris OX=9615 GN=THBD PE=2 SV=1	U	Intracellular trafficking, secretion, and vesicular transport	PREDICTED: complement component C1q receptor [Capra hircus]	molecular function: binding (GO:0005488);; biological process: biological regulation (GO:0065007);; cellular component: cell (GO:0005623);; cellular component: membrane (GO:0016020);; cellular component: cell part (GO:0044464);; cellular component: membrane part (GO:0044425);; biological process: biological adhesion (GO:0022610);; biological process: single-organism process (GO:0044699);; biologi…
gene-FAM89A	6.37024	5.10248	3.94011	2.92258	5.15093	1.76629	2.4224	2.32227	2.45437	5.86806	2.83264	0.873179	-0.159643	normal	0.008667	-0.858206	down	0.714569	-0.256013	normal	--	--	--	--	--	--	--	--	Protein FAM89A OS=Bos taurus OX=9913 GN=FAM89A PE=2 SV=1	S	Function unknown	PREDICTED: protein FAM89A isoform X2 [Ovis aries musimon]	--
gene-FGL1	4.86052	6.48195	2.3956	1.93147	5.78923	1.22089	0.986947	1.40461	3.99041	3.88562	2.41207	0.955899	-0.0732855	normal	0.00597906	-1.04376	down	0.735807	-0.241797	normal	--	--	Cellular Component: extracellular exosome (GO:0070062);;	--	--	[R]	General function prediction only	Fibrinogen beta and gamma chains, C-terminal globular domain	Fibrinogen-like protein 1 OS=Bos taurus OX=9913 GN=FGL1 PE=2 SV=1	S	Function unknown	PREDICTED: fibrinogen-like protein 1 [Capra hircus]	cellular component: extracellular region (GO:0005576);; cellular component: organelle (GO:0043226);; cellular component: extracellular region part (GO:0044421)
gene-FOXO6	3.19152	3.14363	1.05089	2.60542	3.40687	0.710444	0.910756	0.473098	1.51603	1.67403	2.48407	0.854211	0.190232	normal	0.0315659	-0.896156	down	0.82049	-0.182135	normal	--	--	Molecular Function: RNA polymerase II transcription factor activity, sequence-specific DNA binding (GO:0000981);; Cellular Component: nucleus (GO:0005634);; Cellular Component: cytoplasm (GO:0005737);; Biological Process: regulation of transcription from RNA polymerase II promoter (GO:0006357);; Biological Process: memory (GO:0007613);; Molecular Function: sequence-specific DNA binding (GO:004356…	K17847|0|lve:103078459|K17847 forkhead box protein O6 | (RefSeq) FOXO6; forkhead box O6	FoxO signaling pathway (ko04068)	[K]	Transcription	Forkhead domain;; Transactivation domain of FOXO protein family;; KIX-binding domain of forkhead box O, CR2	Forkhead box protein O1 OS=Bos taurus OX=9913 GN=FOXO1 PE=3 SV=2	K	Transcription	PREDICTED: forkhead box protein O6 isoform X2 [Ovis aries musimon]	molecular function: nucleic acid binding transcription factor activity (GO:0001071);; biological process: biological regulation (GO:0065007);; cellular component: cell (GO:0005623);; cellular component: organelle (GO:0043226);; cellular component: cell part (GO:0044464);; biological process: behavior (GO:0007610);; biological process: multicellular organismal process (GO:0032501);; biological pro…
gene-FZD6	11.5952	6.91701	8.88367	5.57452	8.18935	3.39369	4.2673	2.8412	5.3419	5.37954	4.94837	0.746775	-0.227143	normal	2.21e-05	-1.04823	down	0.0452874	-0.637316	down	--	--	Biological Process: neural tube closure (GO:0001843);; Biological Process: hair follicle development (GO:0001942);; Molecular Function: G-protein coupled receptor activity (GO:0004930);; Biological Process: G-protein coupled receptor signaling pathway (GO:0007186);; Cellular Component: integral component of membrane (GO:0016021);; Cellular Component: apicolateral plasma membrane (GO:0016327);; Mo…	K02376|0|oas:101122197|K02376 frizzled 6 | (RefSeq) FZD6; frizzled class receptor 6	mTOR signaling pathway (ko04150);; Wnt signaling pathway (ko04310);; Hippo signaling pathway (ko04390);; Signaling pathways regulating pluripotency of stem cells (ko04550);; Melanogenesis (ko04916);; HTLV-I infection (ko05166);; Pathways in cancer (ko05200);; Proteoglycans in cancer (ko05205);; Basal cell carcinoma (ko05217)	[T]	Signal transduction mechanisms	Frizzled/Smoothened family membrane region;; Fz domain	Frizzled-6 OS=Canis lupus familiaris OX=9615 GN=FZD6 PE=2 SV=1	U	Intracellular trafficking, secretion, and vesicular transport	PREDICTED: frizzled-6 [Ovis aries musimon]	biological process: multicellular organismal process (GO:0032501);; biological process: developmental process (GO:0032502);; biological process: single-organism process (GO:0044699);; molecular function: signal transducer activity (GO:0004871);; molecular function: molecular transducer activity (GO:0060089);; biological process: cellular process (GO:0009987);; biological process: signaling (GO:00…
gene-GASK1B-2	23.0433	22.7343	14.2155	7.91203	17.9259	10.0807	8.9132	7.08734	13.692	17.2828	12.1363	0.615939	-0.347245	normal	0.0066588	-0.846479	down	0.46747	-0.348553	normal	--	--	Cellular Component: Golgi apparatus (GO:0005794);; Cellular Component: integral component of membrane (GO:0016021);;	--	--	--	--	FAM198 protein	--	U	Intracellular trafficking, secretion, and vesicular transport	PREDICTED: protein FAM198B isoform X2 [Ovis aries]	cellular component: cell (GO:0005623);; cellular component: organelle (GO:0043226);; cellular component: cell part (GO:0044464);; cellular component: membrane (GO:0016020);; cellular component: membrane part (GO:0044425)
gene-HR	20.0619	28.6482	18.5849	23.4434	31.7533	10.5809	11.7622	7.7434	24.056	25.2113	19.5031	0.646959	0.288061	normal	0.00434435	-0.848927	down	0.978016	0.0231382	normal	--	--	Molecular Function: transcription corepressor activity (GO:0003714);; Cellular Component: nuclear body (GO:0016604);; Biological Process: negative regulation of transcription, DNA-templated (GO:0045892);;	K00478|0|oas:443241|K00478 lysine-specific demethylase hairless [EC:1.14.11.-] | (RefSeq) HR; HR, lysine demethylase and nuclear receptor corepressor	--	[K]	Transcription	JmjC domain, hydroxylase	--	S	Function unknown	PREDICTED: lysine-specific demethylase hairless isoform X1 [Ovis aries musimon]	molecular function: transcription factor activity, protein binding (GO:0000988);; biological process: biological regulation (GO:0065007);; cellular component: cell (GO:0005623);; cellular component: membrane-enclosed lumen (GO:0031974);; cellular component: organelle (GO:0043226);; cellular component: organelle part (GO:0044422);; cellular component: cell part (GO:0044464)
gene-IGF1	8.38964	6.30129	7.55616	4.12651	4.88796	3.41098	3.75535	1.87268	4.64965	6.06648	5.15775	0.255967	-0.416995	normal	0.000883562	-0.935525	down	0.20503	-0.360957	normal	--	--	Molecular Function: insulin receptor binding (GO:0005158);; Molecular Function: insulin-like growth factor receptor binding (GO:0005159);; Molecular Function: integrin binding (GO:0005178);; Molecular Function: hormone activity (GO:0005179);; Cellular Component: cytosol (GO:0005829);; Molecular Function: growth factor activity (GO:0008083);; Biological Process: response to heat (GO:0009408);; Bio…	K05459|2.94298e-79|oas:443318|K05459 insulin-like growth factor 1 | (RefSeq) IGF1, IGF-I; insulin like growth factor 1	EGFR tyrosine kinase inhibitor resistance (ko01521);; Endocrine resistance (ko01522);; Ras signaling pathway (ko04014);; Rap1 signaling pathway (ko04015);; HIF-1 signaling pathway (ko04066);; FoxO signaling pathway (ko04068);; Oocyte meiosis (ko04114);; p53 signaling pathway (ko04115);; mTOR signaling pathway (ko04150);; PI3K-Akt signaling pathway (ko04151);; AMPK signaling pathway (ko04152);; Lo…	--	--	Insulin/IGF/Relaxin family	Insulin-like growth factor I OS=Ovis aries OX=9940 GN=IGF1 PE=1 SV=2	K	Transcription	Insulin-like growth factor I, partial [Pteropus alecto]	molecular function: binding (GO:0005488);; cellular component: cell (GO:0005623);; cellular component: cell part (GO:0044464);; biological process: response to stimulus (GO:0050896);; biological process: biological regulation (GO:0065007);; biological process: developmental process (GO:0032502);; biological process: cellular process (GO:0009987);; biological process: single-organism process (GO:0…
gene-ISG15	3.21715	2.30151	2.70549	1.83724	2.34913	0.735031	0.5136	0.838496	1.38318	1.34114	1.29261	0.880201	-0.158812	normal	0.0156722	-0.96996	down	0.251827	-0.573109	normal	--	--	Cellular Component: extracellular region (GO:0005576);; Cellular Component: cytoplasm (GO:0005737);; Cellular Component: plasma membrane (GO:0005886);; Biological Process: G-protein coupled acetylcholine receptor signaling pathway (GO:0007213);; Biological Process: modification-dependent protein catabolic process (GO:0019941);; Molecular Function: protein tag (GO:0031386);; Biological Process: ne…	K12159|1.19649e-106|chx:102169982|K12159 ubiquitin cross-reactive protein | (RefSeq) ISG15, ISG17/UCRP; ISG15 ubiquitin-like modifier	RIG-I-like receptor signaling pathway (ko04622)	[OR]	Posttranslational modification, protein turnover, chaperones;; General function prediction only	Ubiquitin family;; Ubiquitin-2 like Rad60 SUMO-like	Ubiquitin-like protein ISG15 OS=Bos taurus OX=9913 GN=ISG15 PE=2 SV=3	O	Posttranslational modification, protein turnover, chaperones	PREDICTED: ubiquitin-like protein ISG15 [Capra hircus]	cellular component: extracellular region (GO:0005576);; cellular component: cell (GO:0005623);; cellular component: cell part (GO:0044464);; cellular component: membrane (GO:0016020);; biological process: cellular process (GO:0009987);; biological process: signaling (GO:0023052);; biological process: single-organism process (GO:0044699);; biological process: response to stimulus (GO:0050896);; bi…
gene-LOC101110855	21.8058	12.3834	14.8923	13.8666	14.454	3.3907	5.27154	5.10429	7.1774	16.8944	10.9431	0.957688	-0.054738	normal	2.87e-07	-1.33465	down	0.647623	-0.285022	normal	--	--	Molecular Function: signal transducer activity (GO:0004871);; Molecular Function: cytokine activity (GO:0005125);; Biological Process: immune response (GO:0006955);; Cellular Component: integral component of membrane (GO:0016021);;	--	--	--	--	--	--	O	Posttranslational modification, protein turnover, chaperones	PREDICTED: uncharacterized protein LOC101110855 isoform X1 [Ovis aries]	molecular function: signal transducer activity (GO:0004871);; molecular function: binding (GO:0005488);; biological process: immune system process (GO:0002376);; biological process: response to stimulus (GO:0050896);; cellular component: membrane (GO:0016020);; cellular component: membrane part (GO:0044425)
gene-LOC101111669	2.12116	1.44086	1.78199	0.960082	2.2344	0.103931	0.39417	0.122188	0.538384	1.40762	0.333529	0.984221	-0.0279808	normal	9.5e-07	-1.58508	down	0.298059	-0.542014	normal	--	--	Cellular Component: nucleosome (GO:0000786);; Molecular Function: DNA binding (GO:0003677);; Cellular Component: nucleus (GO:0005634);; Molecular Function: protein heterodimerization activity (GO:0046982);;	K11251|6.6499e-65|rro:104663541|K11251 histone H2A | (RefSeq) histone H2A type 1-C	Alcoholism (ko05034);; Systemic lupus erythematosus (ko05322)	[B]	Chromatin structure and dynamics	C-terminus of histone H2A;; Core histone H2A/H2B/H3/H4;; Histone-like transcription factor (CBF/NF-Y) and archaeal histone	Histone H2A type 1 OS=Bos taurus OX=9913 PE=1 SV=2	B	Chromatin structure and dynamics	PREDICTED: histone H2A type 1-E-like [Leptonychotes weddellii]	cellular component: cell (GO:0005623);; cellular component: macromolecular complex (GO:0032991);; cellular component: organelle (GO:0043226);; cellular component: organelle part (GO:0044422);; cellular component: cell part (GO:0044464);; molecular function: binding (GO:0005488)
gene-LOC101114712	8.39075	13.8844	11.0103	10.5207	17.3173	2.99022	4.50784	6.31691	22.1055	14.7715	15.9314	0.678927	0.29262	normal	0.0295218	-0.814346	down	0.223402	0.514587	normal	[R]	General function prediction only	Molecular Function: methyltransferase activity (GO:0008168);; Biological Process: methylation (GO:0032259);;	--	--	[A]	RNA processing and modification	Lysine methyltransferase;; Ribosomal protein L11 methyltransferase (PrmA)	Protein-lysine methyltransferase METTL21E OS=Bos taurus OX=9913 GN=METTL21E PE=2 SV=1	S	Function unknown	PREDICTED: protein-lysine methyltransferase METTL21E isoform X1 [Ovis aries]	molecular function: catalytic activity (GO:0003824);; biological process: metabolic process (GO:0008152)
gene-LRRC8D	1.68421	1.35879	0.951355	1.12599	1.49669	0.266891	0.635688	0.256079	1.08405	1.13425	0.531289	0.98896	0.0161196	normal	0.0473501	-0.784971	down	0.27191	-0.448958	normal	[K]	Transcription	Cellular Component: integral component of membrane (GO:0016021);;	--	--	[R]	General function prediction only	Pannexin-like TM region of LRRC8;; Leucine rich repeat;; Leucine Rich repeats (2 copies);; Leucine-rich repeat;; Leucine rich repeats (6 copies);; Leucine Rich Repeat	Volume-regulated anion channel subunit LRRC8C OS=Bos taurus OX=9913 GN=LRRC8C PE=2 SV=1	S	Function unknown	PREDICTED: volume-regulated anion channel subunit LRRC8D [Ovis aries musimon]	cellular component: membrane (GO:0016020);; cellular component: membrane part (GO:0044425)
gene-MMD	12.0679	10.1359	8.92977	8.21986	11.3034	4.26608	7.39117	4.94965	8.48413	8.68581	6.48985	0.986461	0.0169606	normal	0.0188839	-0.677576	down	0.46747	-0.305606	normal	[U]	Intracellular trafficking, secretion, and vesicular transport	Molecular Function: protein kinase activity (GO:0004672);; Cellular Component: Golgi apparatus (GO:0005794);; Cellular Component: integral component of membrane (GO:0016021);; Biological Process: cytolysis (GO:0019835);; Biological Process: regulation of protein localization (GO:0032880);; Biological Process: positive regulation of neuron differentiation (GO:0045666);; Biological Process: positiv…	K11064|2.35976e-167|chx:102176260|K11064 monocyte to macrophage differentiation protein | (RefSeq) MMD; monocyte to macrophage differentiation associated	--	[V]	Defense mechanisms	Haemolysin-III related	--	S	Function unknown	PREDICTED: monocyte to macrophage differentiation factor isoform X2 [Ovis aries musimon]	molecular function: catalytic activity (GO:0003824);; biological process: metabolic process (GO:0008152);; biological process: cellular process (GO:0009987);; cellular component: cell (GO:0005623);; cellular component: organelle (GO:0043226);; cellular component: cell part (GO:0044464);; cellular component: membrane (GO:0016020);; cellular component: membrane part (GO:0044425);; biological proces…
gene-MMP15	9.37575	10.2358	7.77974	6.57233	5.60827	2.88084	4.39781	2.41225	7.58427	6.74185	6.20925	0.384137	-0.392021	normal	3.91e-06	-1.15221	down	0.385539	-0.332503	normal	[O]	Posttranslational modification, protein turnover, chaperones	Molecular Function: metalloendopeptidase activity (GO:0004222);; Molecular Function: calcium ion binding (GO:0005509);; Cellular Component: integral component of plasma membrane (GO:0005887);; Biological Process: proteolysis (GO:0006508);; Molecular Function: zinc ion binding (GO:0008270);; Cellular Component: extracellular matrix (GO:0031012);; Biological Process: endodermal cell differentiation…	K07995|0|chx:102168287|K07995 matrix metalloproteinase-15 (membrane-inserted) [EC:3.4.24.-] | (RefSeq) MMP15; matrix metallopeptidase 15	--	[OW]	Posttranslational modification, protein turnover, chaperones;; Extracellular structures	Matrixin;; Hemopexin;; Domain of unknown function (DUF3377);; Putative peptidoglycan binding domain	Matrix metalloproteinase-14 OS=Pongo abelii OX=9601 GN=MMP14 PE=2 SV=1	O	Posttranslational modification, protein turnover, chaperones	PREDICTED: matrix metalloproteinase-15 isoform X2 [Ovis aries musimon]	molecular function: catalytic activity (GO:0003824);; biological process: metabolic process (GO:0008152);; molecular function: binding (GO:0005488);; cellular component: cell (GO:0005623);; cellular component: membrane (GO:0016020);; cellular component: membrane part (GO:0044425);; cellular component: cell part (GO:0044464);; cellular component: extracellular region (GO:0005576);; cellular compon…
gene-MYO10	9.63651	9.48248	4.76813	4.85345	8.08782	3.53818	2.70768	2.51838	3.53233	6.88237	3.87262	0.90045	-0.133179	normal	0.00541909	-0.949459	down	0.361682	-0.46817	normal	--	--	Cellular Component: ruffle (GO:0001726);; Molecular Function: calmodulin binding (GO:0005516);; Molecular Function: ATP binding (GO:0005524);; Molecular Function: phosphatidylinositol-3,4,5-trisphosphate binding (GO:0005547);; Cellular Component: nucleolus (GO:0005730);; Cellular Component: cytosol (GO:0005829);; Cellular Component: cell cortex (GO:0005938);; Biological Process: signal transducti…	K12559|0|chx:102175716|K12559 myosin X | (RefSeq) MYO10; myosin X	Fc gamma R-mediated phagocytosis (ko04666)	[N]	Cell motility	Myosin head (motor domain);; PH domain;; MyTH4 domain;; FERM central domain;; Unconventional myosin-X coiled coil domain;; Pleckstrin homology domain;; PH domain;; IQ calmodulin-binding motif;; Pleckstrin homology domain;; Ras association (RalGDS/AF-6) domain	Unconventional myosin-X OS=Bos taurus OX=9913 GN=MYO10 PE=1 SV=1	Z	Cytoskeleton	PREDICTED: unconventional myosin-X isoform X2 [Ovis aries musimon]	cellular component: cell (GO:0005623);; cellular component: cell part (GO:0044464);; molecular function: binding (GO:0005488);; cellular component: organelle (GO:0043226);; cellular component: organelle part (GO:0044422);; biological process: cellular process (GO:0009987);; biological process: biological regulation (GO:0065007);; cellular component: macromolecular complex (GO:0032991);; biologica…
gene-PLXDC1	7.51069	6.77102	5.08844	4.56542	6.04904	2.1367	4.30414	1.99308	6.58996	5.85844	4.55613	0.874222	-0.138275	normal	0.0158237	-0.834557	down	0.842667	-0.129785	normal	[O]	Posttranslational modification, protein turnover, chaperones	Biological Process: angiogenesis (GO:0001525);; Cellular Component: cytoplasm (GO:0005737);; Cellular Component: plasma membrane (GO:0005886);; Cellular Component: integral component of membrane (GO:0016021);; Cellular Component: receptor complex (GO:0043235);;	--	--	[W]	Extracellular structures	Plexin repeat	--	S	Function unknown	PREDICTED: plexin domain-containing protein 1 isoform X1 [Ovis aries musimon]	biological process: developmental process (GO:0032502);; biological process: single-organism process (GO:0044699);; cellular component: cell (GO:0005623);; cellular component: cell part (GO:0044464);; cellular component: membrane (GO:0016020);; cellular component: membrane part (GO:0044425);; cellular component: macromolecular complex (GO:0032991)
gene-PPP1R3C	51.2274	75.5848	39.0293	28.354	47.8359	17.4089	22.9352	31.634	57.7273	56.5827	23.9797	0.675416	-0.301394	normal	0.0294011	-0.797544	down	0.826654	-0.168154	normal	--	--	Biological Process: glycogen biosynthetic process (GO:0005978);; Molecular Function: protein phosphatase regulator activity (GO:0019888);; Molecular Function: protein phosphatase binding (GO:0019903);; Biological Process: regulation of catalytic activity (GO:0050790);;	K07189|0|oas:101123512|K07189 protein phosphatase 1 regulatory subunit 3A/B/C/D/E | (RefSeq) PPP1R3C; protein phosphatase 1 regulatory subunit 3C	Insulin signaling pathway (ko04910);; Insulin resistance (ko04931)	[OT]	Posttranslational modification, protein turnover, chaperones;; Signal transduction mechanisms	Carbohydrate/starch-binding module (family 21);; Starch/carbohydrate-binding module (family 53)	Protein phosphatase 1 regulatory subunit 3C OS=Bos taurus OX=9913 GN=PPP1R3C PE=2 SV=1	T	Signal transduction mechanisms	PPP1R3C, partial [Cervus elaphus hippelaphus]	biological process: metabolic process (GO:0008152);; biological process: cellular process (GO:0009987);; biological process: single-organism process (GO:0044699);; molecular function: molecular function regulator (GO:0098772);; biological process: biological regulation (GO:0065007);; molecular function: binding (GO:0005488)
gene-PTGER4	13.2681	10.0422	11.4944	8.37313	7.92056	3.42551	3.64669	3.71548	2.81732	8.24496	6.09533	0.336375	-0.347806	normal	9.51e-15	-1.38758	down	0.180178	-0.626559	normal	--	--	Molecular Function: prostaglandin E receptor activity (GO:0004957);; Cellular Component: plasma membrane (GO:0005886);; Biological Process: adenylate cyclase-modulating G-protein coupled receptor signaling pathway (GO:0007188);; Cellular Component: integral component of membrane (GO:0016021);; Biological Process: regulation of ossification (GO:0030278);; Biological Process: response to lipopolysa…	K04261|0|oas:101104343|K04261 prostaglandin E receptor 4 | (RefSeq) PTGER4, pge2r-EP4; prostaglandin E receptor 4	Neuroactive ligand-receptor interaction (ko04080);; Inflammatory mediator regulation of TRP channels (ko04750);; Renin secretion (ko04924);; Pathways in cancer (ko05200)	[R]	General function prediction only	7 transmembrane receptor (rhodopsin family);; Serpentine type 7TM GPCR chemoreceptor Srx	Prostaglandin E2 receptor EP4 subtype OS=Bos taurus OX=9913 GN=PTGER4 PE=2 SV=1	U	Intracellular trafficking, secretion, and vesicular transport	PREDICTED: prostaglandin E2 receptor EP4 subtype isoform X1 [Ovis aries]	molecular function: signal transducer activity (GO:0004871);; molecular function: molecular transducer activity (GO:0060089);; biological process: cellular process (GO:0009987);; biological process: signaling (GO:0023052);; biological process: single-organism process (GO:0044699);; biological process: response to stimulus (GO:0050896);; biological process: biological regulation (GO:0065007);; cel…
gene-SELENOW	173.38	178.746	171.453	160.381	127.221	75.0661	69.8888	116.247	157.141	165.284	140.968	0.811547	-0.144548	normal	0.0316761	-0.694793	down	0.769251	-0.126196	normal	--	--	Cellular Component: cytoplasm (GO:0005737);; Molecular Function: antioxidant activity (GO:0016209);; Biological Process: cellular oxidant detoxification (GO:0098869);;	--	--	--	--	--	Selenoprotein W OS=Ovis aries OX=9940 GN=SELENOW PE=1 SV=4	O	Posttranslational modification, protein turnover, chaperones	PREDICTED: selenoprotein W isoform X1 [Bos mutus]	cellular component: cell (GO:0005623);; cellular component: cell part (GO:0044464);; molecular function: antioxidant activity (GO:0016209);; biological process: cellular process (GO:0009987);; biological process: response to stimulus (GO:0050896);; biological process: detoxification (GO:0098754)
gene-SFRP4	6.42443	8.69839	4.21257	5.31769	7.52468	1.35907	3.86137	2.47486	2.42117	1.5896	5.8721	0.960225	0.0571201	normal	0.0475797	-0.813682	down	0.383198	-0.481353	normal	--	--	Biological Process: positive regulation of receptor internalization (GO:0002092);; Molecular Function: G-protein coupled receptor activity (GO:0004930);; Cellular Component: extracellular space (GO:0005615);; Cellular Component: nucleus (GO:0005634);; Cellular Component: cytoplasm (GO:0005737);; Biological Process: G-protein coupled receptor signaling pathway (GO:0007186);; Biological Process: ne…	K02185|0|ptr:463356|K02185 secreted frizzled-related protein 4 | (RefSeq) SFRP4; secreted frizzled related protein 4	Wnt signaling pathway (ko04310)	[T]	Signal transduction mechanisms	Fz domain;; UNC-6/NTR/C345C module	Secreted frizzled-related protein 4 OS=Macaca mulatta OX=9544 GN=SFRP4 PE=2 SV=1	U	Intracellular trafficking, secretion, and vesicular transport	PREDICTED: secreted frizzled-related protein 4 [Eptesicus fuscus]	biological process: biological regulation (GO:0065007);; molecular function: signal transducer activity (GO:0004871);; molecular function: molecular transducer activity (GO:0060089);; biological process: cellular process (GO:0009987);; biological process: signaling (GO:0023052);; biological process: single-organism process (GO:0044699);; biological process: response to stimulus (GO:0050896);; cel…
gene-TMEM98	3.21976	2.5709	2.74953	1.33533	2.22325	0.797041	1.16878	0.917294	1.77878	2.62386	2.06333	0.545105	-0.381872	normal	0.000220307	-1.09269	down	0.677333	-0.255195	normal	--	--	Cellular Component: endoplasmic reticulum (GO:0005783);; Cellular Component: integral component of membrane (GO:0016021);;	--	--	--	--	Grap2 and cyclin-D-interacting	Transmembrane protein 98 OS=Bos taurus OX=9913 GN=TMEM98 PE=2 SV=1	S	Function unknown	PREDICTED: transmembrane protein 98 isoform X1 [Bos taurus]	cellular component: cell (GO:0005623);; cellular component: organelle (GO:0043226);; cellular component: cell part (GO:0044464);; cellular component: membrane (GO:0016020);; cellular component: membrane part (GO:0044425)
gene-TNFSF10	21.1508	23.0433	17.8326	10.3736	18.2938	4.58873	6.34405	7.13357	14.2382	16.0753	8.88729	0.587052	-0.327111	normal	5.23e-10	-1.41494	down	0.22331	-0.506477	normal	--	--	Molecular Function: cytokine activity (GO:0005125);; Molecular Function: tumor necrosis factor receptor binding (GO:0005164);; Cellular Component: extracellular space (GO:0005615);; Biological Process: immune response (GO:0006955);; Cellular Component: integral component of membrane (GO:0016021);; Biological Process: positive regulation of I-kappaB kinase/NF-kappaB signaling (GO:0043123);; Biolog…	K04721|0|oas:101114153|K04721 tumor necrosis factor ligand superfamily member 10 | (RefSeq) TNFSF10; tumor necrosis factor superfamily member 10	Cytokine-cytokine receptor interaction (ko04060);; FoxO signaling pathway (ko04068);; Apoptosis (ko04210);; Natural killer cell mediated cytotoxicity (ko04650);; Measles (ko05162);; Influenza A (ko05164)	--	--	TNF(Tumour Necrosis Factor) family	Tumor necrosis factor ligand superfamily member 6 OS=Cercocebus atys OX=9531 GN=FASLG PE=2 SV=1	S	Function unknown	PREDICTED: tumor necrosis factor ligand superfamily member 10 isoform X1 [Ovis aries]	molecular function: binding (GO:0005488);; cellular component: extracellular region (GO:0005576);; cellular component: extracellular region part (GO:0044421);; biological process: immune system process (GO:0002376);; biological process: response to stimulus (GO:0050896);; cellular component: membrane (GO:0016020);; cellular component: membrane part (GO:0044425);; biological process: biological re…
gene-ZNF395	8.88398	8.11106	8.96373	6.36425	5.77495	3.24027	3.8913	3.8714	8.09718	7.22082	6.75873	0.226114	-0.360595	normal	2.27e-10	-1.01734	down	0.606392	-0.17963	normal	--	--	Molecular Function: RNA polymerase II core promoter proximal region sequence-specific DNA binding (GO:0000978);; Cellular Component: nucleus (GO:0005634);; Cellular Component: cytoplasm (GO:0005737);; Molecular Function: metal ion binding (GO:0046872);;	--	--	--	--	Domain of unknown function (DUF4772)	--	S	Function unknown	PREDICTED: zinc finger protein 395 isoform X2 [Ovis aries musimon]	molecular function: binding (GO:0005488);; cellular component: cell (GO:0005623);; cellular component: organelle (GO:0043226);; cellular component: cell part (GO:0044464)

## Sheet: cluster8
#ID
Ovis_aries_newGene_18940	0.527635	0.788501	1.19083	0.151504	0.474072	0.205725	0.231328	0.126497	0.708958	0.308696	0.332058	0.520593	-0.417484	normal	0.021688	-0.939478	down	0.606392	-0.331999	normal	--	--	--	--	--	--	--	--	LINE-1 reverse transcriptase homolog OS=Nycticebus coucang OX=9470 PE=3 SV=1	--	--	hypothetical protein M91_00785, partial [Bos mutus]	--
Ovis_aries_newGene_21983	4.15775	2.78732	4.03447	2.80242	3.43929	1.51998	2.55207	1.37351	2.31997	2.22322	2.49897	0.919279	-0.0893114	normal	0.0279644	-0.718729	down	0.1772	-0.492224	normal	--	--	--	--	--	--	--	--	--	--	--	PREDICTED: GDNF family receptor alpha-1 isoform X1 [Odobenus rosmarus divergens]	--
Ovis_aries_newGene_22611	0.759942	0.673934	0.619856	0.394597	0.735752	0.137595	0.284771	0.327154	0.279457	0.137786	0.217095	0.923847	-0.106468	normal	0.0660003	-0.796242	normal	0.0160245	-0.953061	down	--	--	Molecular Function: nucleic acid binding (GO:0003676);; Molecular Function: RNA-directed DNA polymerase activity (GO:0003964);; Molecular Function: phospholipid binding (GO:0005543);; Cellular Component: proteinaceous extracellular matrix (GO:0005578);; Cellular Component: mitochondrion (GO:0005739);; Cellular Component: plasma membrane (GO:0005886);; Cellular Component: fascia adherens (GO:00059…	K09228|2.0175e-42|bta:100138479|K09228 KRAB domain-containing zinc finger protein | (RefSeq) zinc finger protein 510	--	--	--	--	--	S	Function unknown	reverse transcriptase-like [Bos taurus]	molecular function: binding (GO:0005488);; molecular function: catalytic activity (GO:0003824);; biological process: metabolic process (GO:0008152);; biological process: cellular process (GO:0009987);; cellular component: extracellular region (GO:0005576);; cellular component: extracellular region part (GO:0044421);; cellular component: cell (GO:0005623);; cellular component: organelle (GO:004322…
Ovis_aries_newGene_22987	2.2541	1.85489	2.85733	2.11131	1.52477	0.718532	1.07517	1.03171	1.9183	1.80377	1.0133	0.00711252	-0.701964	down	0.147797	-0.632053	normal	0.349003	-0.38205	normal	--	--	--	--	--	--	--	--	LINE-1 reverse transcriptase homolog OS=Nycticebus coucang OX=9470 PE=3 SV=1	S	Function unknown	PREDICTED: uncharacterized protein LOC102334977 [Pantholops hodgsonii]	--
Ovis_aries_newGene_4282	3.40916	2.26367	2.07544	0.612791	2.22293	0.995334	0.979988	1.55381	0.880708	2.83254	1.21846	0.0987769	-0.780691	normal	2.98e-05	-1.3768	down	0.80563	-0.150479	normal	--	--	--	K09228|4.01314e-55|oas:100527962|K09228 KRAB domain-containing zinc finger protein | (RefSeq) ZNF33B; zinc finger protein 33B	--	[R]	General function prediction only	--	--	S	Function unknown	reverse transcriptase-like [Bos taurus]	--
gene-ADAMTS7	1.44072	0.815292	0.716161	0.413707	0.612301	0.266072	0.472458	0.404761	0.368999	0.647222	0.478129	0.399629	-0.499602	normal	0.0308249	-0.843683	down	0.240359	-0.58198	normal	--	--	Molecular Function: metalloendopeptidase activity (GO:0004222);; Cellular Component: proteinaceous extracellular matrix (GO:0005578);; Molecular Function: zinc ion binding (GO:0008270);; Cellular Component: cell surface (GO:0009986);; Biological Process: negative regulation of chondrocyte differentiation (GO:0032331);; Biological Process: proteolysis involved in cellular protein catabolic process…	K08622|0|bom:102283528|K08622 a disintegrin and metalloproteinase with thrombospondin motifs 7 [EC:3.4.24.-] | (RefSeq) ADAMTS7; ADAM metallopeptidase with thrombospondin type 1 motif 7	--	[O]	Posttranslational modification, protein turnover, chaperones	Reprolysin family propeptide;; ADAM-TS Spacer 1;; Thrombospondin type 1 domain;; Reprolysin (M12B) family zinc metalloprotease;; Metallo-peptidase family M12;; Metallo-peptidase family M12B Reprolysin-like	A disintegrin and metalloproteinase with thrombospondin motifs 2 OS=Bos taurus OX=9913 GN=ADAMTS2 PE=1 SV=1	S	Function unknown	PREDICTED: A disintegrin and metalloproteinase with thrombospondin motifs 7 isoform X2 [Ovis aries musimon]	molecular function: catalytic activity (GO:0003824);; biological process: metabolic process (GO:0008152);; cellular component: extracellular region (GO:0005576);; cellular component: extracellular region part (GO:0044421);; molecular function: binding (GO:0005488);; cellular component: cell (GO:0005623);; cellular component: cell part (GO:0044464);; biological process: biological regulation (GO:0…
gene-ADCY7	3.02208	2.18532	2.44666	1.90396	1.58504	1.30977	1.6984	1.0133	1.76969	2.37821	1.78676	0.577786	-0.30893	normal	0.0473756	-0.641013	down	0.583804	-0.270738	normal	[T]	Signal transduction mechanisms	Molecular Function: adenylate cyclase activity (GO:0004016);; Molecular Function: ATP binding (GO:0005524);; Cellular Component: intracellular (GO:0005622);; Cellular Component: plasma membrane (GO:0005886);; Biological Process: adenylate cyclase-activating G-protein coupled receptor signaling pathway (GO:0007189);; Biological Process: adenylate cyclase-inhibiting G-protein coupled receptor signa…	K08047|0|chx:102185858|K08047 adenylate cyclase 7 [EC:4.6.1.1] | (RefSeq) ADCY7; adenylate cyclase 7	Purine metabolism (ko00230);; Endocrine resistance (ko01522);; Rap1 signaling pathway (ko04015);; Calcium signaling pathway (ko04020);; cGMP-PKG signaling pathway (ko04022);; cAMP signaling pathway (ko04024);; Chemokine signaling pathway (ko04062);; Phospholipase D signaling pathway (ko04072);; Oocyte meiosis (ko04114);; Longevity regulating pathway (ko04211);; Longevity regulating pathway - mult…	[C]	Energy production and conversion	Adenylate and Guanylate cyclase catalytic domain;; Domain of Unknown Function (DUF1053);; Adenylyl cyclase N-terminal extracellular and transmembrane region	Adenylate cyclase type 7 OS=Bos taurus OX=9913 GN=ADCY7 PE=2 SV=1	T	Signal transduction mechanisms	PREDICTED: adenylate cyclase type 7 isoform X3 [Ovis aries musimon]	molecular function: catalytic activity (GO:0003824);; molecular function: binding (GO:0005488);; cellular component: cell (GO:0005623);; cellular component: cell part (GO:0044464);; cellular component: membrane (GO:0016020);; biological process: cellular process (GO:0009987);; biological process: signaling (GO:0023052);; biological process: single-organism process (GO:0044699);; biological proces…
ADCYAP1R1	1.53557	1.07678	1.07359	0.539321	0.478667	0.443317	0.565806	0.331183	1.18274	0.518273	0.278531	0.0161819	-0.850214	down	0.000781065	-1.01692	down	0.37263	-0.485667	normal	--	--	Molecular Function: vasoactive intestinal polypeptide receptor activity (GO:0004999);; Cellular Component: plasma membrane (GO:0005886);; Biological Process: cell surface receptor signaling pathway (GO:0007166);; Biological Process: G-protein coupled receptor signaling pathway (GO:0007186);; Cellular Component: integral component of membrane (GO:0016021);; Cellular Component: receptor complex (GO…	K04587|0|phd:102338986|K04587 pituitary adenylate cyclase-activating polypeptide type I receptor | (RefSeq) ADCYAP1R1; ADCYAP receptor type I	cAMP signaling pathway (ko04024);; Neuroactive ligand-receptor interaction (ko04080);; Circadian entrainment (ko04713);; Insulin secretion (ko04911);; Renin secretion (ko04924)	[T]	Signal transduction mechanisms	7 transmembrane receptor (Secretin family);; Hormone receptor domain	Pituitary adenylate cyclase-activating polypeptide type I receptor OS=Bos taurus OX=9913 GN=ADCYAP1R1 PE=2 SV=1	U	Intracellular trafficking, secretion, and vesicular transport	PREDICTED: pituitary adenylate cyclase-activating polypeptide type I receptor isoform X1 [Ovis aries musimon]	molecular function: signal transducer activity (GO:0004871);; molecular function: molecular transducer activity (GO:0060089);; biological process: cellular process (GO:0009987);; biological process: signaling (GO:0023052);; biological process: single-organism process (GO:0044699);; biological process: response to stimulus (GO:0050896);; biological process: biological regulation (GO:0065007);; cel…
gene-AMIGO2	2.49507	2.02098	1.3003	0.955703	1.68277	0.338542	0.838003	0.874664	1.47214	1.13506	1.05215	0.744401	-0.271547	normal	0.0430117	-0.84479	down	0.394634	-0.440877	normal	[K]	Transcription	Molecular Function: protein binding (GO:0005515);; Cellular Component: integral component of membrane (GO:0016021);; Biological Process: negative regulation of apoptotic process (GO:0043066);; Biological Process: positive regulation of synapse assembly (GO:0051965);;	--	--	--	--	Leucine rich repeat;; Leucine Rich repeats (2 copies);; Leucine rich repeats (6 copies);; Leucine Rich Repeat;; Immunoglobulin domain	Amphoterin-induced protein 2 OS=Pongo abelii OX=9601 GN=AMIGO2 PE=2 SV=1	S	Function unknown	PREDICTED: amphoterin-induced protein 2 [Ovis aries]	molecular function: binding (GO:0005488);; cellular component: membrane (GO:0016020);; cellular component: membrane part (GO:0044425);; biological process: biological regulation (GO:0065007)
gene-ANKRD34B	0.878074	0.416906	0.259877	0.081771	0.304618	0.085883	0.090432	0.02177	0.033861	0.467117	0.087413	0.523315	-0.397962	normal	0.00658997	-1.02707	down	0.53282	-0.332139	normal	[T]	Signal transduction mechanisms	--	--	--	--	--	Ankyrin repeats (many copies);; Ankyrin repeats (3 copies);; Ankyrin repeat;; Ankyrin repeats (many copies);; Ankyrin repeat	LINE-1 reverse transcriptase homolog OS=Nycticebus coucang OX=9470 PE=3 SV=1	S	Function unknown	PREDICTED: ankyrin repeat domain-containing protein 34B [Ovis aries musimon]	--
gene-ANKRD50	2.0617	1.74166	1.61319	1.58261	1.54206	0.846505	1.13611	1.06093	1.53737	1.18153	1.35074	0.919279	-0.082181	normal	0.0266014	-0.61288	down	0.427615	-0.321473	normal	[D]	Cell cycle control, cell division, chromosome partitioning	Cellular Component: intracellular (GO:0005622);; Biological Process: retrograde transport, endosome to plasma membrane (GO:1990126);;	--	--	[R]	General function prediction only	Ankyrin repeats (3 copies);; Ankyrin repeats (many copies);; Ankyrin repeat;; Ankyrin repeats (many copies);; Ankyrin repeat	Inversin OS=Canis lupus familiaris OX=9615 GN=INVS PE=1 SV=1	S	Function unknown	PREDICTED: ankyrin repeat domain-containing protein 50 [Ovis aries musimon]	cellular component: cell (GO:0005623);; cellular component: cell part (GO:0044464);; biological process: localization (GO:0051179)
gene-ARMCX1	5.76465	4.55813	5.08138	2.49975	4.54812	2.24308	3.74602	2.5267	4.08957	4.01127	3.16302	0.618925	-0.316748	normal	0.0436258	-0.615949	down	0.376427	-0.349578	normal	--	--	--	--	--	--	--	Armadillo-like;; Armadillo/beta-catenin-like repeat	Armadillo repeat-containing X-linked protein 1 OS=Pongo abelii OX=9601 GN=ARMCX1 PE=2 SV=1	S	Function unknown	PREDICTED: armadillo repeat-containing X-linked protein 1 [Ovis aries]	--
gene-BMPER	1.61868	1.13179	1.62379	0.798504	1.42599	0.592283	0.885859	0.642554	1.48003	0.993326	0.953111	0.847257	-0.186007	normal	0.0392493	-0.717862	down	0.700304	-0.236342	normal	--	--	--	--	--	[WV]	Extracellular structures;; Defense mechanisms	von Willebrand factor type D domain;; von Willebrand factor type C domain;; C8 domain;; Trypsin Inhibitor like cysteine rich domain	SCO-spondin OS=Bos taurus OX=9913 GN=SSPO PE=2 SV=2	S	Function unknown	PREDICTED: BMP-binding endothelial regulator protein isoform X1 [Ovis aries musimon]	--
gene-CACNA1A	0.490042	0.379807	0.351188	0.106211	0.224215	0.128389	0.149612	0.202806	0.249189	0.164696	0.185563	0.183831	-0.676365	normal	0.0333471	-0.823459	down	0.11973	-0.675623	normal	--	--	Biological Process: sulfur amino acid metabolic process (GO:0000096);; Cellular Component: nucleus (GO:0005634);; Cellular Component: cytoplasm (GO:0005737);; Cellular Component: voltage-gated calcium channel complex (GO:0005891);; Biological Process: glucose metabolic process (GO:0006006);; Biological Process: positive regulation of cytosolic calcium ion concentration (GO:0007204);; Biological P…	K04344|0|bta:282648|K04344 voltage-dependent calcium channel P/Q type alpha-1A | (RefSeq) CACNA1A, CAV2.1; calcium voltage-gated channel subunit alpha1 A	MAPK signaling pathway (ko04010);; Calcium signaling pathway (ko04020);; Synaptic vesicle cycle (ko04721);; Retrograde endocannabinoid signaling (ko04723);; Glutamatergic synapse (ko04724);; Cholinergic synapse (ko04725);; Serotonergic synapse (ko04726);; GABAergic synapse (ko04727);; Dopaminergic synapse (ko04728);; Long-term depression (ko04730);; Taste transduction (ko04742);; Type II diabetes…	[PT]	Inorganic ion transport and metabolism;; Signal transduction mechanisms	Ion transport protein;; Voltage-dependent L-type calcium channel, IQ-associated;; Voltage gated calcium channel IQ domain;; Polycystin cation channel	Voltage-dependent P/Q-type calcium channel subunit alpha-1A OS=Oryctolagus cuniculus OX=9986 GN=CACNA1A PE=1 SV=1	U	Intracellular trafficking, secretion, and vesicular transport	PREDICTED: voltage-dependent P/Q-type calcium channel subunit alpha-1A isoform X7 [Capra hircus]	biological process: metabolic process (GO:0008152);; biological process: cellular process (GO:0009987);; biological process: single-organism process (GO:0044699);; cellular component: cell (GO:0005623);; cellular component: organelle (GO:0043226);; cellular component: cell part (GO:0044464);; cellular component: membrane (GO:0016020);; cellular component: macromolecular complex (GO:0032991);; cel…
gene-CACNG7	1.47528	1.28923	1.00533	0.425554	1.20883	0.326417	0.32219	0.47268	0.685613	0.636002	0.681355	0.768949	-0.258844	normal	0.0031574	-1.05199	down	0.1772	-0.610415	normal	--	--	Molecular Function: voltage-gated ion channel activity (GO:0005244);; Molecular Function: calcium channel activity (GO:0005262);; Cellular Component: integral component of membrane (GO:0016021);; Biological Process: calcium ion transmembrane transport (GO:0070588);; Biological Process: regulation of AMPA receptor activity (GO:2000311);;	K04872|0|tup:102482749|K04872 voltage-dependent calcium channel gamma-7 | (RefSeq) CACNG7; calcium voltage-gated channel auxiliary subunit gamma 7	MAPK signaling pathway (ko04010);; Cardiac muscle contraction (ko04260);; Adrenergic signaling in cardiomyocytes (ko04261);; Oxytocin signaling pathway (ko04921);; Hypertrophic cardiomyopathy (HCM) (ko05410);; Arrhythmogenic right ventricular cardiomyopathy (ARVC) (ko05412);; Dilated cardiomyopathy (ko05414)	--	--	PMP-22/EMP/MP20/Claudin tight junction;; PMP-22/EMP/MP20/Claudin family	--	U	Intracellular trafficking, secretion, and vesicular transport	PREDICTED: voltage-dependent calcium channel gamma-7 subunit [Myotis brandtii]	molecular function: transporter activity (GO:0005215);; biological process: localization (GO:0051179);; biological process: biological regulation (GO:0065007);; cellular component: membrane (GO:0016020);; cellular component: membrane part (GO:0044425)
gene-CADM2	0.25731	0.296667	0.199396	0.092402	0.128768	0.089672	0.052574	0.080253	0.118404	0.206725	0.046559	0.295471	-0.588019	normal	0.0289644	-0.899692	down	0.451095	-0.434314	normal	--	--	Molecular Function: receptor activity (GO:0004872);; Molecular Function: receptor binding (GO:0005102);; Cellular Component: integral component of plasma membrane (GO:0005887);; Cellular Component: cell-cell adherens junction (GO:0005913);; Biological Process: homophilic cell adhesion via plasma membrane adhesion molecules (GO:0007156);; Biological Process: heterophilic cell-cell adhesion via pla…	K06782|1.213e-111|phd:102329026|K06782 cell adhesion molecule 2 | (RefSeq) CADM2; cell adhesion molecule 2	--	--	--	Immunoglobulin I-set domain;; Immunoglobulin domain;; Immunoglobulin domain;; Immunoglobulin domain;; CD80-like C2-set immunoglobulin domain	Contactin-associated protein-like 2 OS=Pongo abelii OX=9601 GN=CNTNAP2 PE=2 SV=1	U	Intracellular trafficking, secretion, and vesicular transport	PREDICTED: cell adhesion molecule 2 isoform X2 [Orcinus orca]	molecular function: molecular transducer activity (GO:0060089);; molecular function: binding (GO:0005488);; cellular component: cell (GO:0005623);; cellular component: membrane (GO:0016020);; cellular component: membrane part (GO:0044425);; cellular component: cell part (GO:0044464);; cellular component: cell junction (GO:0030054);; biological process: biological adhesion (GO:0022610);; biologica…
gene-CALCR	0.61171	0.366786	0.732622	0.311127	0.280635	0.109681	0.127744	0.206148	0.335841	0.284103	0.107173	0.50315	-0.436417	normal	0.0203576	-0.944908	down	0.278197	-0.5574	normal	--	--	Cellular Component: acrosomal vesicle (GO:0001669);; Molecular Function: calcitonin receptor activity (GO:0004948);; Cellular Component: cilium (GO:0005929);; Biological Process: cell surface receptor signaling pathway (GO:0007166);; Biological Process: adenylate cyclase-activating G-protein coupled receptor signaling pathway (GO:0007189);; Biological Process: positive regulation of cytosolic cal…	K04576|0|chx:102184585|K04576 calcitonin receptor | (RefSeq) CALCR; calcitonin receptor	Neuroactive ligand-receptor interaction (ko04080);; Osteoclast differentiation (ko04380)	[T]	Signal transduction mechanisms	7 transmembrane receptor (Secretin family);; Hormone receptor domain	Calcitonin receptor OS=Sus scrofa OX=9823 GN=CALCR PE=2 SV=2	U	Intracellular trafficking, secretion, and vesicular transport	PREDICTED: calcitonin receptor [Ovis aries musimon]	cellular component: cell (GO:0005623);; cellular component: organelle (GO:0043226);; cellular component: cell part (GO:0044464);; molecular function: signal transducer activity (GO:0004871);; molecular function: molecular transducer activity (GO:0060089);; biological process: cellular process (GO:0009987);; biological process: signaling (GO:0023052);; biological process: single-organism process (…
gene-CASP3	1.24655	1.63374	2.05587	0.940994	1.11129	0.466578	0.832726	0.539122	1.49997	1.44395	1.43188	0.522432	-0.391242	normal	0.00614553	-0.943689	down	0.899122	-0.097723	normal	--	--	Biological Process: B cell homeostasis (GO:0001782);; Molecular Function: aspartic-type endopeptidase activity (GO:0004190);; Molecular Function: cyclin-dependent protein serine/threonine kinase inhibitor activity (GO:0004861);; Molecular Function: protein binding (GO:0005515);; Cellular Component: nucleus (GO:0005634);; Cellular Component: cytosol (GO:0005829);; Biological Process: cellular resp…	K02187|0|oas:443031|K02187 caspase 3 [EC:3.4.22.56] | (RefSeq) CASP3, CPP32; caspase 3	Platinum drug resistance (ko01524);; MAPK signaling pathway (ko04010);; p53 signaling pathway (ko04115);; Apoptosis (ko04210);; Apoptosis - multiple species (ko04215);; Natural killer cell mediated cytotoxicity (ko04650);; TNF signaling pathway (ko04668);; Serotonergic synapse (ko04726);; Non-alcoholic fatty liver disease (NAFLD) (ko04932);; AGE-RAGE signaling pathway in diabetic complications (k…	[D]	Cell cycle control, cell division, chromosome partitioning	Caspase domain	Caspase-3 OS=Bos taurus OX=9913 GN=CASP3 PE=2 SV=1	O	Posttranslational modification, protein turnover, chaperones	PREDICTED: caspase-3 [Ovis aries musimon]	biological process: immune system process (GO:0002376);; biological process: biological regulation (GO:0065007);; molecular function: catalytic activity (GO:0003824);; biological process: metabolic process (GO:0008152);; molecular function: molecular function regulator (GO:0098772);; molecular function: binding (GO:0005488);; cellular component: cell (GO:0005623);; cellular component: organelle (…
gene-CD44	14.5179	12.985	14.8105	9.26833	12.5103	6.93421	10.5822	7.25631	9.06324	10.5633	10.7678	0.63124	-0.234689	normal	0.0125535	-0.58827	down	0.257863	-0.381046	normal	--	--	Molecular Function: hyalurononglucosaminidase activity (GO:0004415);; Molecular Function: cytokine receptor activity (GO:0004896);; Molecular Function: hyaluronic acid binding (GO:0005540);; Cellular Component: Golgi apparatus (GO:0005794);; Cellular Component: plasma membrane (GO:0005886);; Cellular Component: focal adhesion (GO:0005925);; Cellular Component: cell surface (GO:0009986);; Cellular…	K06256|0|chx:102182426|K06256 CD44 antigen | (RefSeq) CD44; CD44 molecule (Indian blood group)	ECM-receptor interaction (ko04512);; Hematopoietic cell lineage (ko04640);; Epstein-Barr virus infection (ko05169);; Proteoglycans in cancer (ko05205);; MicroRNAs in cancer (ko05206)	--	--	Extracellular link domain	CD44 antigen OS=Bos taurus OX=9913 GN=CD44 PE=2 SV=1	U	Intracellular trafficking, secretion, and vesicular transport	PREDICTED: CD44 antigen isoform X13 [Ovis aries musimon]	molecular function: catalytic activity (GO:0003824);; molecular function: signal transducer activity (GO:0004871);; molecular function: molecular transducer activity (GO:0060089);; biological process: cellular process (GO:0009987);; biological process: signaling (GO:0023052);; biological process: single-organism process (GO:0044699);; biological process: response to stimulus (GO:0050896);; biolog…
gene-CELSR1	0.487581	0.379018	0.496749	0.288142	0.237584	0.186072	0.279633	0.203807	0.165601	0.15428	0.163413	0.304232	-0.500798	normal	0.0298123	-0.717517	down	0.000131705	-1.09707	down	[U]	Intracellular trafficking, secretion, and vesicular transport	--	K04600|0|lve:103085146|K04600 cadherin EGF LAG seven-pass G-type receptor 1 | (RefSeq) CELSR1; cadherin EGF LAG seven-pass G-type receptor 1	--	[T]	Signal transduction mechanisms	Cadherin domain;; GPCR-Autoproteolysis INducing (GAIN) domain;; 7 transmembrane receptor (Secretin family);; Laminin G domain;; Laminin G domain;; Cadherin-like;; GPCR proteolysis site, GPS, motif;; EGF-like domain;; Hormone receptor domain;; Laminin EGF domain;; Human growth factor-like EGF;; Cadherin prodomain like;; Slime mold cyclic AMP receptor	Protocadherin-11 X-linked OS=Pan paniscus OX=9597 GN=PCDH11X PE=3 SV=1	S	Function unknown	PREDICTED: LOW QUALITY PROTEIN: cadherin EGF LAG seven-pass G-type receptor 1 [Capra hircus]	--
gene-CHN2	1.45364	1.37968	1.32406	1.23398	1.23928	0.57955	0.515618	0.538855	2.03611	0.928813	1.01688	0.969516	-0.0402993	normal	0.00324346	-0.926791	down	0.975838	-0.0299921	normal	--	--	Molecular Function: GTPase activator activity (GO:0005096);; Cellular Component: cytoplasm (GO:0005737);; Biological Process: positive regulation of GTPase activity (GO:0043547);; Molecular Function: metal ion binding (GO:0046872);; Biological Process: regulation of small GTPase mediated signal transduction (GO:0051056);;	K20630|0|oas:101103716|K20630 chimaerin | (RefSeq) CHN2; chimerin 2	--	[T]	Signal transduction mechanisms	RhoGAP domain;; Phorbol esters/diacylglycerol binding domain (C1 domain);; SH2 domain	N-chimaerin OS=Bos taurus OX=9913 GN=CHN1 PE=2 SV=1	S	Function unknown	PREDICTED: beta-chimaerin [Ovis aries]	molecular function: molecular function regulator (GO:0098772);; biological process: biological regulation (GO:0065007);; cellular component: cell (GO:0005623);; cellular component: cell part (GO:0044464);; molecular function: binding (GO:0005488)
gene-CLCN5	2.08048	2.44022	1.99832	2.23713	0.862469	1.13879	1.38786	1.16614	1.33702	1.37893	1.24199	0.800297	-0.225292	normal	0.0188839	-0.613039	down	0.0569034	-0.587455	normal	[T]	Signal transduction mechanisms	Molecular Function: voltage-gated chloride channel activity (GO:0005247);; Cellular Component: lysosomal membrane (GO:0005765);; Biological Process: chloride transport (GO:0006821);; Cellular Component: integral component of membrane (GO:0016021);; Cellular Component: apical part of cell (GO:0045177);; Biological Process: regulation of anion transmembrane transport (GO:1903959);;	K05012|0|chx:102187202|K05012 chloride channel 3/4/5 | (RefSeq) CLCN5; chloride voltage-gated channel 5	--	[P]	Inorganic ion transport and metabolism	Voltage gated chloride channel;; CBS domain	H(+)/Cl(-) exchange transporter 5 OS=Sus scrofa OX=9823 GN=CLCN5 PE=2 SV=1	P	Inorganic ion transport and metabolism	PREDICTED: H(+)/Cl(-) exchange transporter 5 isoform X4 [Ovis aries]	molecular function: transporter activity (GO:0005215);; biological process: localization (GO:0051179);; biological process: biological regulation (GO:0065007);; cellular component: cell (GO:0005623);; cellular component: membrane (GO:0016020);; cellular component: organelle (GO:0043226);; cellular component: organelle part (GO:0044422);; cellular component: cell part (GO:0044464);; cellular compo…
gene-DLG2	0.97108	0.925481	0.725402	0.776152	0.889262	0.389572	0.428235	0.266134	0.345551	1.04556	0.388712	0.98288	0.0252997	normal	0.00895877	-0.86968	down	0.680425	-0.28201	normal	[F]	Nucleotide transport and metabolism	Molecular Function: guanylate kinase activity (GO:0004385);; Biological Process: chemical synaptic transmission (GO:0007268);; Biological Process: nervous system development (GO:0007399);; Cellular Component: ionotropic glutamate receptor complex (GO:0008328);; Biological Process: negative regulation of phosphatase activity (GO:0010923);; Cellular Component: postsynaptic density of dendrite (GO:0…	K12075|0|ocu:100345988|K12075 discs large protein 2 | (RefSeq) DLG2; discs large MAGUK scaffold protein 2	Hippo signaling pathway (ko04390)	[F]	Nucleotide transport and metabolism	Guanylate kinase;; PDZ domain (Also known as DHR or GLGF);; PDZ-associated domain of NMDA receptors;; PDZ domain;; Variant SH3 domain;; SH3 domain	MAGUK p55 subfamily member 5 OS=Pongo abelii OX=9601 GN=MPP5 PE=2 SV=1	F	Nucleotide transport and metabolism	disks large homolog 2 isoform X6 [Felis catus]	molecular function: catalytic activity (GO:0003824);; biological process: metabolic process (GO:0008152);; biological process: cellular process (GO:0009987);; biological process: single-organism process (GO:0044699);; biological process: signaling (GO:0023052);; biological process: multicellular organismal process (GO:0032501);; biological process: developmental process (GO:0032502);; cellular co…
gene-DPYD	5.86765	4.2948	4.1719	5.12059	1.9349	2.69594	1.75996	2.68954	4.11414	3.8805	2.56945	0.847479	-0.191541	normal	0.0315659	-0.735118	down	0.354078	-0.39586	normal	[ER]	Amino acid transport and metabolism;; General function prediction only	Cellular Component: cytosol (GO:0005829);; Biological Process: purine nucleobase catabolic process (GO:0006145);; Biological Process: thymine catabolic process (GO:0006210);; Biological Process: uracil catabolic process (GO:0006212);; Biological Process: thymidine catabolic process (GO:0006214);; Molecular Function: FMN binding (GO:0010181);; Molecular Function: dihydropyrimidine dehydrogenase (N…	K00207|0|oas:101109311|K00207 dihydropyrimidine dehydrogenase (NADP+) [EC:1.3.1.2] | (RefSeq) DPYD; dihydropyrimidine dehydrogenase	Pyrimidine metabolism (ko00240);; beta-Alanine metabolism (ko00410);; Pantothenate and CoA biosynthesis (ko00770);; Drug metabolism - other enzymes (ko00983)	[F]	Nucleotide transport and metabolism	Dihydroorotate dehydrogenase;; Dihydroprymidine dehydrogenase domain II, 4Fe-4S cluster;; 4Fe-4S dicluster domain;; Pyridine nucleotide-disulphide oxidoreductase;; NAD(P)-binding Rossmann-like domain;; Pyridine nucleotide-disulphide oxidoreductase;; Dihydrouridine synthase (Dus)	Dihydropyrimidine dehydrogenase [NADP(+)] OS=Bos taurus OX=9913 GN=DPYD PE=1 SV=1	F	Nucleotide transport and metabolism	PREDICTED: dihydropyrimidine dehydrogenase [NADP(+)] isoform X1 [Ovis aries]	cellular component: cell (GO:0005623);; cellular component: cell part (GO:0044464);; biological process: metabolic process (GO:0008152);; biological process: cellular process (GO:0009987);; biological process: single-organism process (GO:0044699);; molecular function: binding (GO:0005488);; molecular function: catalytic activity (GO:0003824)
gene-ECM2	20.6825	20.5523	18.3596	15.0428	15.0683	9.85111	13.5282	11.2088	15.7876	13.7456	14.7163	0.490857	-0.26088	normal	0.00188011	-0.609717	down	0.225285	-0.357014	normal	[K]	Transcription	Cellular Component: interstitial matrix (GO:0005614);; Cellular Component: extracellular space (GO:0005615);; Biological Process: axonogenesis (GO:0007409);; Molecular Function: heparin binding (GO:0008201);; Biological Process: positive regulation of cell-substrate adhesion (GO:0010811);; Biological Process: extracellular matrix organization (GO:0030198);; Molecular Function: collagen V binding …	K08119|0|bom:102277220|K08119 extracellular matrix protein 2 | (RefSeq) ECM2; extracellular matrix protein 2	--	[R]	General function prediction only	Leucine rich repeat;; Leucine Rich repeats (2 copies);; von Willebrand factor type C domain;; Leucine rich repeats (6 copies);; FNIP Repeat;; Leucine Rich Repeat	Extracellular matrix protein 2 OS=Bos taurus OX=9913 GN=ECM2 PE=2 SV=1	S	Function unknown	ECM2, partial [Cervus elaphus hippelaphus]	cellular component: extracellular region (GO:0005576);; cellular component: extracellular region part (GO:0044421);; biological process: cellular process (GO:0009987);; biological process: multicellular organismal process (GO:0032501);; biological process: developmental process (GO:0032502);; biological process: single-organism process (GO:0044699);; biological process: cellular component organiz…
gene-FAT4	1.74405	1.77942	1.87399	1.21161	1.17325	0.879714	1.23491	0.983727	1.30292	1.22663	1.35441	0.114657	-0.435432	normal	0.00135765	-0.622559	down	0.187297	-0.390245	normal	[U]	Intracellular trafficking, secretion, and vesicular transport	Biological Process: branching involved in ureteric bud morphogenesis (GO:0001658);; Biological Process: heart morphogenesis (GO:0003007);; Molecular Function: calcium ion binding (GO:0005509);; Cellular Component: intracellular (GO:0005622);; Cellular Component: plasma membrane (GO:0005886);; Biological Process: plasma membrane organization (GO:0007009);; Biological Process: homophilic cell adhes…	K16669|0|chx:102179034|K16669 protocadherin Fat 4 | (RefSeq) FAT4; FAT atypical cadherin 4	Hippo signaling pathway -multiple species (ko04392)	[S]	Function unknown	Cadherin domain;; Cadherin-like;; Laminin G domain;; Laminin G domain;; Cadherin-like;; EGF-like domain;; Calcium-binding EGF domain;; Human growth factor-like EGF;; EGF-like domain	Protocadherin-11 X-linked OS=Sus scrofa OX=9823 GN=PCDH11X PE=2 SV=1	S	Function unknown	PREDICTED: protocadherin Fat 4 isoform X2 [Ovis aries musimon]	biological process: multicellular organismal process (GO:0032501);; biological process: developmental process (GO:0032502);; biological process: single-organism process (GO:0044699);; molecular function: binding (GO:0005488);; cellular component: cell (GO:0005623);; cellular component: cell part (GO:0044464);; cellular component: membrane (GO:0016020);; biological process: cellular process (GO:00…
gene-IFIT2	2.04768	2.2508	2.37103	0.91961	1.75711	1.10048	1.16082	1.23591	2.0989	1.85904	1.27446	0.430346	-0.442754	normal	0.018251	-0.675838	down	0.628549	-0.25472	normal	--	--	Cellular Component: endoplasmic reticulum (GO:0005783);; Biological Process: negative regulation of protein binding (GO:0032091);; Biological Process: cellular response to interferon-alpha (GO:0035457);; Molecular Function: identical protein binding (GO:0042802);; Biological Process: positive regulation of apoptotic process (GO:0043065);; Molecular Function: RNA binding (GO:0044822);; Biological …	--	--	[R]	General function prediction only	Tetratricopeptide repeat;; Tetratricopeptide repeat;; Tetratricopeptide repeat;; Tetratricopeptide repeat;; Tetratricopeptide repeat;; TPR repeat;; Tetratricopeptide repeat;; Tetratricopeptide repeat;; Tetratricopeptide repeat;; Tetratricopeptide repeat;; Tetratricopeptide repeat;; Tetratricopeptide repeat;; Tetratricopeptide repeat	Interferon-induced protein with tetratricopeptide repeats 3 OS=Pan troglodytes OX=9598 GN=IFIT3 PE=2 SV=1	S	Function unknown	PREDICTED: interferon-induced protein with tetratricopeptide repeats 2 [Ovis aries musimon]	cellular component: cell (GO:0005623);; cellular component: organelle (GO:0043226);; cellular component: cell part (GO:0044464);; biological process: biological regulation (GO:0065007);; biological process: cellular process (GO:0009987);; biological process: response to stimulus (GO:0050896);; molecular function: binding (GO:0005488);; biological process: immune system process (GO:0002376);; biol…
gene-ITGA9	3.22401	2.29001	2.09789	1.24394	2.00914	1.12491	1.35437	1.203	1.56186	1.65867	1.90647	0.542095	-0.375134	normal	0.018327	-0.744065	down	0.374613	-0.406095	normal	[Q]	Secondary metabolites biosynthesis, transport and catabolism	Biological Process: cell adhesion (GO:0007155);; Biological Process: integrin-mediated signaling pathway (GO:0007229);; Cellular Component: integrin complex (GO:0008305);; Cellular Component: basal plasma membrane (GO:0009925);; Biological Process: neutrophil chemotaxis (GO:0030593);;	K06585|0|oas:101109832|K06585 integrin alpha 9 | (RefSeq) ITGA9; integrin subunit alpha 9	PI3K-Akt signaling pathway (ko04151);; Focal adhesion (ko04510);; ECM-receptor interaction (ko04512);; Cell adhesion molecules (CAMs) (ko04514);; Regulation of actin cytoskeleton (ko04810);; Hypertrophic cardiomyopathy (HCM) (ko05410);; Arrhythmogenic right ventricular cardiomyopathy (ARVC) (ko05412);; Dilated cardiomyopathy (ko05414)	[W]	Extracellular structures	Integrin alpha;; FG-GAP repeat;; Repeat domain in Vibrio, Colwellia, Bradyrhizobium and Shewanella;; FG-GAP repeat	Integrin alpha-3 OS=Bos taurus OX=9913 GN=ITGA3 PE=3 SV=1	U	Intracellular trafficking, secretion, and vesicular transport	PREDICTED: integrin alpha-9 isoform X1 [Ovis aries]	biological process: biological adhesion (GO:0022610);; biological process: cellular process (GO:0009987);; biological process: signaling (GO:0023052);; biological process: single-organism process (GO:0044699);; biological process: response to stimulus (GO:0050896);; biological process: biological regulation (GO:0065007);; cellular component: cell (GO:0005623);; cellular component: membrane (GO:00…
gene-KCNB1	2.60204	2.47902	2.5873	2.88738	1.57531	1.21531	1.67695	1.27339	2.59919	1.12676	2.82494	0.957956	-0.0553635	normal	0.000168445	-0.696754	down	0.862597	-0.135286	normal	[T]	Signal transduction mechanisms	Molecular Function: delayed rectifier potassium channel activity (GO:0005251);; Cellular Component: intracellular (GO:0005622);; Biological Process: vesicle docking involved in exocytosis (GO:0006904);; Biological Process: glutamate receptor signaling pathway (GO:0007215);; Cellular Component: voltage-gated potassium channel complex (GO:0008076);; Biological Process: positive regulation of norepi…	K04885|0|oas:101121535|K04885 potassium voltage-gated channel Shab-related subfamily B member 1 | (RefSeq) KCNB1; potassium voltage-gated channel subfamily B member 1	--	[P]	Inorganic ion transport and metabolism	Kv2 voltage-gated K+ channel;; Ion transport protein;; BTB/POZ domain;; Ion channel	Potassium voltage-gated channel subfamily B member 1 OS=Sus scrofa OX=9823 GN=KCNB1 PE=2 SV=1	P	Inorganic ion transport and metabolism	PREDICTED: potassium voltage-gated channel subfamily B member 1 [Ovis aries]	molecular function: transporter activity (GO:0005215);; biological process: cellular process (GO:0009987);; biological process: single-organism process (GO:0044699);; biological process: localization (GO:0051179);; biological process: biological regulation (GO:0065007);; cellular component: cell (GO:0005623);; cellular component: cell part (GO:0044464);; biological process: signaling (GO:0023052)…
gene-KCNMB1	1.91024	2.42801	2.07504	1.41932	1.26975	1.19234	1.40734	1.02508	1.48067	1.5864	0.838782	0.325435	-0.438953	normal	0.0468064	-0.614465	down	0.24473	-0.513052	normal	--	--	Biological Process: detection of calcium ion (GO:0005513);; Biological Process: chemical synaptic transmission (GO:0007268);; Cellular Component: voltage-gated potassium channel complex (GO:0008076);; Molecular Function: calcium-activated potassium channel activity (GO:0015269);; Molecular Function: potassium channel regulator activity (GO:0015459);; Biological Process: potassium ion transmembran…	K04937|1.33336e-93|oas:100302624|K04937 potassium large conductance calcium-activated channel subfamily M beta member 1 | (RefSeq) KCNMB1; potassium calcium-activated channel subfamily M regulatory beta subunit 1	cGMP-PKG signaling pathway (ko04022);; Vascular smooth muscle contraction (ko04270);; Insulin secretion (ko04911)	--	--	Calcium-activated potassium channel, beta subunit	Calcium-activated potassium channel subunit beta-1 OS=Bos taurus OX=9913 GN=KCNMB1 PE=1 SV=3	U	Intracellular trafficking, secretion, and vesicular transport	PREDICTED: calcium-activated potassium channel subunit beta-1 isoform X1 [Ovis aries]	biological process: response to stimulus (GO:0050896);; biological process: cellular process (GO:0009987);; biological process: signaling (GO:0023052);; biological process: single-organism process (GO:0044699);; cellular component: cell (GO:0005623);; cellular component: membrane (GO:0016020);; cellular component: macromolecular complex (GO:0032991);; cellular component: membrane part (GO:0044425…
gene-KCP	2.88316	2.58854	2.16773	1.06012	1.53632	1.23552	1.48181	1.07791	1.69329	2.03916	1.18483	0.0785961	-0.673088	normal	0.00597906	-0.752285	down	0.279263	-0.465656	normal	--	--	Biological Process: hematopoietic progenitor cell differentiation (GO:0002244);; Cellular Component: extracellular space (GO:0005615);; Biological Process: positive regulation of BMP signaling pathway (GO:0030513);;	--	--	[WV]	Extracellular structures;; Defense mechanisms	von Willebrand factor type C domain;; von Willebrand factor type D domain;; TILa domain	Zonadhesin OS=Sus scrofa OX=9823 GN=ZAN PE=1 SV=1	S	Function unknown	PREDICTED: kielin/chordin-like protein isoform X2 [Ovis aries musimon]	biological process: cellular process (GO:0009987);; biological process: developmental process (GO:0032502);; biological process: single-organism process (GO:0044699);; cellular component: extracellular region (GO:0005576);; cellular component: extracellular region part (GO:0044421);; biological process: biological regulation (GO:0065007)
gene-KIAA0040	8.05192	6.72032	5.90282	3.57111	5.32916	3.36472	4.70885	3.63533	6.24848	5.55122	4.99385	0.379887	-0.417861	normal	0.0206653	-0.61427	down	0.60118	-0.229791	normal	--	--	Cellular Component: integral component of membrane (GO:0016021);;	--	--	--	--	--	--	S	Function unknown	hypothetical protein Celaphus_00011141, partial [Cervus elaphus hippelaphus]	cellular component: membrane (GO:0016020);; cellular component: membrane part (GO:0044425)
gene-LOC101103714	3.26812	1.98495	1.91366	0.924972	1.9641	0.753337	1.41476	0.870676	1.1689	1.7455	1.28913	0.545193	-0.394542	normal	0.0489565	-0.751618	down	0.269355	-0.513318	normal	--	--	Cellular Component: integral component of membrane (GO:0016021);; Molecular Function: carbohydrate binding (GO:0030246);;	K10072|8.85875e-146|oas:101103227|K10072 C-type lectin domain family 2 member D | (RefSeq) C-type lectin domain family 2 member E-like	--	[TV]	Signal transduction mechanisms;; Defense mechanisms	Lectin C-type domain	NKG2-D type II integral membrane protein OS=Macaca mulatta OX=9544 GN=KLRK1 PE=2 SV=1	S	Function unknown	PREDICTED: C-type lectin domain family 2 member D11-like isoform X1 [Ovis aries]	cellular component: membrane (GO:0016020);; cellular component: membrane part (GO:0044425);; molecular function: binding (GO:0005488)
gene-LOC101107282	1.61045	1.0997	1.02665	1.05484	1.05041	0.627807	0.758669	0.591069	0.735148	1.40415	1.26309	0.912983	-0.100468	normal	0.0384	-0.654222	down	0.950376	-0.0551487	normal	[S]	Function unknown	Biological Process: morphogenesis of an epithelium (GO:0002009);; Biological Process: metanephros morphogenesis (GO:0003338);; Biological Process: cell communication (GO:0007154);; Biological Process: protein transport (GO:0015031);; Cellular Component: integral component of membrane (GO:0016021);; Biological Process: embryonic limb morphogenesis (GO:0030326);; Biological Process: skin developmen…	--	--	--	--	Cadherin-like;; Calx-beta domain;; Furin-like repeat, cysteine-rich;; Giardia variant-specific surface protein;; Growth factor receptor domain IV	Cysteine-rich with EGF-like domain protein 2 OS=Bos taurus OX=9913 GN=CRELD2 PE=2 SV=1	U	Intracellular trafficking, secretion, and vesicular transport	PREDICTED: extracellular matrix protein FRAS1 isoform X2 [Ovis aries]	biological process: developmental process (GO:0032502);; biological process: single-organism process (GO:0044699);; biological process: multicellular organismal process (GO:0032501);; biological process: cellular process (GO:0009987);; biological process: localization (GO:0051179);; cellular component: membrane (GO:0016020);; cellular component: membrane part (GO:0044425);; cellular component: ex…
gene-LOC101108212	0.509335	0.408486	0.484215	0.074087	0.197944	0.085313	0.085729	0.18581	0.174819	0.384152	0.131131	0.117435	-0.757949	normal	0.0195121	-0.948492	down	0.39799	-0.473184	normal	[T]	Signal transduction mechanisms	Molecular Function: adenylate cyclase activity (GO:0004016);; Molecular Function: guanylate cyclase activity (GO:0004383);; Molecular Function: protein kinase activity (GO:0004672);; Molecular Function: ATP binding (GO:0005524);; Molecular Function: GTP binding (GO:0005525);; Cellular Component: endoplasmic reticulum membrane (GO:0005789);; Cellular Component: plasma membrane (GO:0005886);; Biolo…	K12320|0|oas:101108212|K12320 heat-stable enterotoxin receptor [EC:4.6.1.2] | (RefSeq) GUCY2C; guanylate cyclase 2C	Purine metabolism (ko00230)	[T]	Signal transduction mechanisms	Adenylate and Guanylate cyclase catalytic domain;; Protein tyrosine kinase;; Protein kinase domain;; Receptor family ligand binding region	Heat-stable enterotoxin receptor OS=Sus scrofa OX=9823 GN=GUCY2C PE=2 SV=2	T	Signal transduction mechanisms	PREDICTED: heat-stable enterotoxin receptor isoform X2 [Ovis aries]	molecular function: catalytic activity (GO:0003824);; biological process: metabolic process (GO:0008152);; biological process: cellular process (GO:0009987);; molecular function: binding (GO:0005488);; cellular component: cell (GO:0005623);; cellular component: membrane (GO:0016020);; cellular component: organelle (GO:0043226);; cellular component: organelle part (GO:0044422);; cellular component…
gene-LOC101115905	15.8325	15.5379	12.5439	7.36161	13.5504	7.65392	7.97906	8.05898	10.4768	14.5952	10.5915	0.6675	-0.285453	normal	0.0107556	-0.661184	down	0.693519	-0.2127	normal	--	--	Molecular Function: filamin binding (GO:0031005);; Cellular Component: actin filament bundle (GO:0032432);; Biological Process: skeletal system morphogenesis (GO:0048705);; Biological Process: negative regulation of chondrocyte development (GO:0061182);; Biological Process: actin filament bundle organization (GO:0061572);; Biological Process: negative regulation of bone mineralization involved in…	--	--	--	--	FAM101 family	--	S	Function unknown	PREDICTED: filamin-interacting protein FAM101A isoform X2 [Ovis aries musimon]	molecular function: binding (GO:0005488);; cellular component: cell (GO:0005623);; cellular component: organelle (GO:0043226);; cellular component: organelle part (GO:0044422);; cellular component: cell part (GO:0044464);; biological process: multicellular organismal process (GO:0032501);; biological process: developmental process (GO:0032502);; biological process: single-organism process (GO:004…
gene-LOC101118851	5.26015	4.0691	3.46025	3.11403	2.75512	1.9708	1.80076	1.84981	3.04522	3.20339	2.77879	0.524053	-0.338845	normal	0.00217579	-0.859056	down	0.355013	-0.377493	normal	[M]	Cell wall/membrane/envelope biogenesis	Molecular Function: ubiquitin-protein transferase activity (GO:0004842);; Biological Process: protein ubiquitination (GO:0016567);; Cellular Component: Cul3-RING ubiquitin ligase complex (GO:0031463);;	K10460|0|chx:102169914|K10460 kelch-like protein 23 | (RefSeq) KLHL23; kelch like family member 23	--	[TR]	Signal transduction mechanisms;; General function prediction only	Kelch motif;; Kelch motif;; BTB/POZ domain;; BTB And C-terminal Kelch;; Galactose oxidase, central domain;; Kelch motif;; Galactose oxidase, central domain;; Kelch motif;; Domain of unknown function (DUF3342)	Kelch-like protein 23 OS=Pongo abelii OX=9601 GN=KLHL23 PE=2 SV=1	S	Function unknown	PREDICTED: kelch-like protein 23 isoform X3 [Ovis aries musimon]	molecular function: catalytic activity (GO:0003824);; biological process: metabolic process (GO:0008152);; biological process: cellular process (GO:0009987);; cellular component: cell (GO:0005623);; cellular component: macromolecular complex (GO:0032991);; cellular component: cell part (GO:0044464)
gene-LOC106990096	3.20112	4.23946	3.05522	1.48646	2.22533	1.19554	2.00454	1.87437	2.46245	3.33873	1.837	0.183476	-0.600943	normal	0.0230067	-0.746956	down	0.56059	-0.31769	normal	--	--	Cellular Component: extracellular region (GO:0005576);; Biological Process: complement activation, alternative pathway (GO:0006957);;	K04004|0|bta:280816|K04004 complement factor H | (RefSeq) CFH, HF1; complement factor H	Complement and coagulation cascades (ko04610);; Staphylococcus aureus infection (ko05150)	--	--	Sushi repeat (SCR repeat)	Complement factor H OS=Bos taurus OX=9913 GN=CFH PE=1 SV=3	S	Function unknown	PREDICTED: complement factor H isoform X1 [Capra hircus]	cellular component: extracellular region (GO:0005576);; biological process: immune system process (GO:0002376);; biological process: metabolic process (GO:0008152);; biological process: response to stimulus (GO:0050896);; biological process: biological regulation (GO:0065007)
gene-LTBP1	10.0716	6.50708	8.03492	5.56206	5.44677	3.81997	5.88978	3.65127	5.91273	5.17733	6.6877	0.345799	-0.393999	normal	0.0352669	-0.616965	down	0.411064	-0.340509	normal	--	--	Cellular Component: microfibril (GO:0001527);; Biological Process: ventricular septum development (GO:0003281);; Molecular Function: calcium ion binding (GO:0005509);; Cellular Component: proteinaceous extracellular matrix (GO:0005578);; Biological Process: aorta development (GO:0035904);; Cellular Component: protein complex (GO:0043234);; Molecular Function: transforming growth factor beta bindi…	K19559|0|oas:101102219|K19559 latent transforming growth factor beta binding protein 1 | (RefSeq) LTBP1; latent transforming growth factor beta binding protein 1	TGF-beta signaling pathway (ko04350)	[T]	Signal transduction mechanisms	Calcium-binding EGF domain;; Complement Clr-like EGF-like;; TB domain;; EGF-like domain;; Human growth factor-like EGF;; EGF domain	Latent-transforming growth factor beta-binding protein 2 OS=Bos taurus OX=9913 GN=LTBP2 PE=1 SV=2	A	RNA processing and modification	PREDICTED: latent-transforming growth factor beta-binding protein 1 isoform X1 [Ovis aries musimon]	cellular component: extracellular region (GO:0005576);; cellular component: extracellular region part (GO:0044421);; cellular component: supramolecular complex (GO:0099080);; biological process: multicellular organismal process (GO:0032501);; biological process: developmental process (GO:0032502);; biological process: single-organism process (GO:0044699);; molecular function: binding (GO:0005488)…
gene-LUM	39.1884	42.5615	38.2249	31.3283	32.2642	20.7875	24.6039	21.1451	34.846	32.674	22.5371	0.650485	-0.198192	normal	0.000359543	-0.664829	down	0.404751	-0.327974	normal	[K]	Transcription	Molecular Function: collagen binding (GO:0005518);; Cellular Component: fibrillar collagen trimer (GO:0005583);; Cellular Component: extracellular space (GO:0005615);; Biological Process: axonogenesis (GO:0007409);; Biological Process: visual perception (GO:0007601);; Biological Process: collagen fibril organization (GO:0030199);; Biological Process: positive regulation of transforming growth fac…	K08122|0|oas:101112967|K08122 lumican | (RefSeq) LUM; lumican	Proteoglycans in cancer (ko05205)	[R]	General function prediction only	Leucine rich repeat;; Leucine Rich repeats (2 copies);; Leucine Rich repeat;; Leucine Rich Repeat;; Leucine-rich repeat;; Leucine rich repeat N-terminal domain	Lumican OS=Bos taurus OX=9913 GN=LUM PE=1 SV=1	S	Function unknown	PREDICTED: lumican [Ovis aries]	molecular function: binding (GO:0005488);; cellular component: extracellular region (GO:0005576);; cellular component: macromolecular complex (GO:0032991);; cellular component: extracellular region part (GO:0044421);; biological process: cellular process (GO:0009987);; biological process: multicellular organismal process (GO:0032501);; biological process: developmental process (GO:0032502);; biol…
gene-MECOM	3.78252	3.59774	3.06466	2.15035	2.35763	1.84741	1.80957	1.58124	2.91598	3.1514	1.91347	0.186156	-0.488018	normal	0.00652149	-0.768913	down	0.517478	-0.309833	normal	--	--	Cellular Component: histone deacetylase complex (GO:0000118);; Molecular Function: nucleic acid binding (GO:0003676);; Molecular Function: transcription factor activity, sequence-specific DNA binding (GO:0003700);; Cellular Component: Golgi apparatus (GO:0005794);; Cellular Component: aggresome (GO:0016235);; Cellular Component: nuclear speck (GO:0016607);; Molecular Function: protein homodimeriz…	K04462|0|chx:102182261|K04462 ecotropic virus integration site 1 protein | (RefSeq) MECOM; MDS1 and EVI1 complex locus	MAPK signaling pathway (ko04010);; Pathways in cancer (ko05200);; Chronic myeloid leukemia (ko05220)	[R]	General function prediction only	Zinc finger, C2H2 type;; Zinc-finger double domain;; C2H2-type zinc finger;; C2H2-type zinc finger;; Zinc-finger double-stranded RNA-binding	Zinc finger protein 16 OS=Gorilla gorilla gorilla OX=9595 GN=ZNF16 PE=3 SV=1	S	Function unknown	PREDICTED: MDS1 and EVI1 complex locus protein EVI1-like isoform X1 [Bubalus bubalis]	cellular component: cell (GO:0005623);; cellular component: membrane-enclosed lumen (GO:0031974);; cellular component: macromolecular complex (GO:0032991);; cellular component: organelle (GO:0043226);; cellular component: organelle part (GO:0044422);; cellular component: cell part (GO:0044464);; molecular function: binding (GO:0005488);; molecular function: nucleic acid binding transcription fact…
gene-NCALD	4.85534	4.72766	5.79106	3.92196	3.12224	2.36833	3.67988	2.57038	3.78074	3.58886	4.00408	0.427162	-0.351675	normal	0.0165027	-0.62167	down	0.348224	-0.334455	normal	--	--	Biological Process: regulation of systemic arterial blood pressure (GO:0003073);; Molecular Function: actin binding (GO:0003779);; Molecular Function: calcium ion binding (GO:0005509);; Cellular Component: cytosol (GO:0005829);; Molecular Function: ligand-gated ion channel activity (GO:0015276);; Biological Process: vesicle-mediated transport (GO:0016192);; Biological Process: calcium-mediated si…	K19695|7.60596e-130|umr:103661515|K19695 neurocalcin delta | (RefSeq) NCALD; neurocalcin delta	Olfactory transduction (ko04740)	[T]	Signal transduction mechanisms	EF-hand domain pair;; EF hand;; EF hand;; EF-hand domain;; EF-hand domain pair;; Secreted protein acidic and rich in cysteine Ca binding region;; Cytoskeletal-regulatory complex EF hand	Neurocalcin-delta OS=Macaca fascicularis OX=9541 GN=NCALD PE=2 SV=3	DTZ	Cell cycle control, cell division, chromosome partitioning;; Signal transduction mechanisms;; Cytoskeleton	neurocalcin-delta [Bos taurus]	biological process: multicellular organismal process (GO:0032501);; biological process: biological regulation (GO:0065007);; molecular function: binding (GO:0005488);; cellular component: cell (GO:0005623);; cellular component: cell part (GO:0044464);; molecular function: transporter activity (GO:0005215);; molecular function: molecular transducer activity (GO:0060089);; biological process: local…
gene-NCAM1	3.10827	2.34312	2.92602	1.93952	1.33417	0.896287	1.71389	1.55441	1.76177	1.54271	2.45694	0.343568	-0.456142	normal	0.0343656	-0.704679	down	0.483838	-0.338926	normal	[S]	Function unknown	Biological Process: cell adhesion (GO:0007155);; Cellular Component: integral component of membrane (GO:0016021);; Biological Process: neuron projection development (GO:0031175);; Biological Process: regulation of synaptic plasticity (GO:0048167);;	K06491|0|chx:102177818|K06491 neural cell adhesion molecule | (RefSeq) NCAM1; neural cell adhesion molecule 1	Cell adhesion molecules (CAMs) (ko04514);; Prion diseases (ko05020)	[T]	Signal transduction mechanisms	Immunoglobulin I-set domain;; Immunoglobulin domain;; Immunoglobulin domain;; Immunoglobulin domain;; Fibronectin type III domain;; Immunoglobulin V-set domain;; CD80-like C2-set immunoglobulin domain;; Ig-like domain on T-cell surface glycoprotein CD3 epsilon chain;; Izumo-like Immunoglobulin domain;; T-cell surface glycoprotein CD3 delta chain;; Immunoglobulin C1-set domain	Neural cell adhesion molecule 1 OS=Bos taurus OX=9913 GN=NCAM1 PE=1 SV=1	U	Intracellular trafficking, secretion, and vesicular transport	PREDICTED: neural cell adhesion molecule 1 isoform X26 [Ovis aries musimon]	biological process: biological adhesion (GO:0022610);; cellular component: membrane (GO:0016020);; cellular component: membrane part (GO:0044425);; biological process: cellular process (GO:0009987);; biological process: single-organism process (GO:0044699);; biological process: cellular component organization or biogenesis (GO:0071840);; biological process: biological regulation (GO:0065007)
gene-NPPC	3.35738	2.69433	4.7077	2.33189	1.74711	1.38041	2.06153	1.47805	2.02599	1.89896	2.75894	0.322647	-0.50028	normal	0.00737734	-0.808582	down	0.276474	-0.484693	normal	--	--	Biological Process: ossification (GO:0001503);; Biological Process: growth plate cartilage chondrocyte differentiation (GO:0003418);; Biological Process: growth plate cartilage chondrocyte proliferation (GO:0003419);; Molecular Function: hormone activity (GO:0005179);; Cellular Component: extracellular region (GO:0005576);; Biological Process: cGMP biosynthetic process (GO:0006182);; Biological P…	K12336|2.72933e-42|oas:493773|K12336 natriuretic peptide C | (RefSeq) NPPC, CNP; natriuretic peptide C	--	--	--	Atrial natriuretic peptide	C-type natriuretic peptide OS=Ovis aries OX=9940 GN=NPPC PE=3 SV=1	O	Posttranslational modification, protein turnover, chaperones	C-type natriuretic peptide precursor [Ovis aries]	biological process: multicellular organismal process (GO:0032501);; biological process: single-organism process (GO:0044699);; biological process: cellular process (GO:0009987);; biological process: developmental process (GO:0032502);; molecular function: binding (GO:0005488);; cellular component: extracellular region (GO:0005576);; biological process: metabolic process (GO:0008152);; biological …
gene-NPTX2	1.31492	0.914752	0.830581	0.274138	1.14008	0.067473	0.211179	0.221312	0.729972	0.362133	0.269575	0.869195	-0.170041	normal	0.000261381	-1.2793	down	0.229822	-0.607302	normal	[U]	Intracellular trafficking, secretion, and vesicular transport	Biological Process: associative learning (GO:0008306);;	--	--	--	--	Pentaxin family;; Concanavalin A-like lectin/glucanases superfamily	Pentraxin-related protein PTX3 OS=Bos taurus OX=9913 GN=PTX3 PE=2 SV=1	S	Function unknown	PREDICTED: neuronal pentraxin-2 [Bubalus bubalis]	biological process: behavior (GO:0007610);; biological process: multicellular organismal process (GO:0032501);; biological process: single-organism process (GO:0044699)
gene-OPCML	0.322694	0.354554	0.313464	0.306733	0.08502	0.101819	0.063792	0.111077	0.147943	0.157434	0.073169	0.762495	-0.259397	normal	0.0109925	-0.984378	down	0.0971076	-0.758894	normal	--	--	Cellular Component: plasma membrane (GO:0005886);; Biological Process: cell adhesion (GO:0007155);; Cellular Component: anchored component of membrane (GO:0031225);; Cellular Component: extracellular exosome (GO:0070062);;	K06773|0|oas:101117888|K06773 opioid binding protein/cell adhesion molecule-like | (RefSeq) OPCML; opioid binding protein/cell adhesion molecule like	--	[T]	Signal transduction mechanisms	Immunoglobulin I-set domain;; Immunoglobulin domain;; Immunoglobulin domain;; Immunoglobulin domain;; Immunoglobulin V-set domain;; Izumo-like Immunoglobulin domain;; Ig-like domain on T-cell surface glycoprotein CD3 epsilon chain	Opioid-binding protein/cell adhesion molecule OS=Bos taurus OX=9913 GN=OPCML PE=1 SV=1	S	Function unknown	PREDICTED: opioid-binding protein/cell adhesion molecule isoform X3 [Ovis aries]	cellular component: cell (GO:0005623);; cellular component: membrane (GO:0016020);; cellular component: cell part (GO:0044464);; biological process: biological adhesion (GO:0022610);; cellular component: membrane part (GO:0044425);; cellular component: extracellular region (GO:0005576);; cellular component: organelle (GO:0043226);; cellular component: extracellular region part (GO:0044421)
gene-P3H2	3.06869	2.69287	2.72369	2.03084	2.16938	1.30259	1.60612	1.55813	2.13192	2.10811	2.14228	0.588384	-0.269176	normal	0.00992392	-0.686048	down	0.439933	-0.314891	normal	--	--	Molecular Function: iron ion binding (GO:0005506);; Cellular Component: basement membrane (GO:0005604);; Cellular Component: endoplasmic reticulum (GO:0005783);; Cellular Component: Golgi apparatus (GO:0005794);; Biological Process: negative regulation of cell proliferation (GO:0008285);; Biological Process: peptidyl-proline hydroxylation (GO:0019511);; Molecular Function: procollagen-proline 3-d…	--	--	[S]	Function unknown	2OG-Fe(II) oxygenase superfamily;; 2OG-Fe(II) oxygenase superfamily;; Tetratricopeptide repeat	--	O	Posttranslational modification, protein turnover, chaperones	PREDICTED: prolyl 3-hydroxylase 2 isoform X1 [Ovis aries]	molecular function: binding (GO:0005488);; cellular component: extracellular region (GO:0005576);; cellular component: extracellular region part (GO:0044421);; cellular component: cell (GO:0005623);; cellular component: organelle (GO:0043226);; cellular component: cell part (GO:0044464);; biological process: biological regulation (GO:0065007);; biological process: metabolic process (GO:0008152);;…
gene-PAQR6	7.45054	6.19726	6.55213	3.85195	7.24701	3.19599	4.48401	4.02191	5.08544	5.25129	4.05052	0.918757	-0.106371	normal	0.00737734	-0.637646	down	0.221459	-0.420803	normal	--	--	Molecular Function: steroid hormone receptor activity (GO:0003707);; Molecular Function: steroid binding (GO:0005496);; Cellular Component: plasma membrane (GO:0005886);; Cellular Component: integral component of membrane (GO:0016021);; Biological Process: steroid hormone mediated signaling pathway (GO:0043401);;	--	--	[RT]	General function prediction only;; Signal transduction mechanisms	Haemolysin-III related	Membrane progestin receptor beta OS=Sus scrofa OX=9823 GN=PAQR8 PE=2 SV=1	S	Function unknown	PREDICTED: progestin and adipoQ receptor family member 6 isoform X1 [Ovis aries]	molecular function: signal transducer activity (GO:0004871);; molecular function: molecular transducer activity (GO:0060089);; biological process: cellular process (GO:0009987);; biological process: signaling (GO:0023052);; biological process: single-organism process (GO:0044699);; biological process: response to stimulus (GO:0050896);; biological process: biological regulation (GO:0065007);; mol…
gene-PARP14	2.24559	2.04973	2.6026	1.38787	1.72901	0.760564	1.40828	1.15549	1.4603	1.24419	1.39342	0.353901	-0.380626	normal	0.00584366	-0.780548	down	0.0338389	-0.613049	down	[J]	Translation, ribosomal structure and biogenesis	Molecular Function: nucleotide binding (GO:0000166);; Molecular Function: NAD+ ADP-ribosyltransferase activity (GO:0003950);; Cellular Component: cytoplasm (GO:0005737);; Molecular Function: zinc ion binding (GO:0008270);; Cellular Component: membrane (GO:0016020);;	K15261|0|oas:101114323|K15261 poly [ADP-ribose] polymerase 10/14/15 [EC:2.4.2.30] | (RefSeq) PARP14; poly(ADP-ribose) polymerase family member 14	--	--	--	Macro domain;; Poly(ADP-ribose) polymerase catalytic domain;; WWE domain	Ganglioside-induced differentiation-associated protein 2 OS=Bos taurus OX=9913 GN=GDAP2 PE=2 SV=1	S	Function unknown	PREDICTED: poly [ADP-ribose] polymerase 14 isoform X1 [Ovis aries]	molecular function: binding (GO:0005488);; molecular function: catalytic activity (GO:0003824);; cellular component: cell (GO:0005623);; cellular component: cell part (GO:0044464);; cellular component: membrane (GO:0016020)
gene-PARVB	14.4422	18.7836	12.139	22.6234	22.2211	23.3417	27.9016	23.4166	35.9685	17.521	37.0365	0.200666	0.536101	normal	0.0107726	0.715064	up	0.0646538	0.734642	normal	--	--	Molecular Function: actin binding (GO:0003779);; Cellular Component: focal adhesion (GO:0005925);; Biological Process: cell adhesion (GO:0007155);; Cellular Component: lamellipodium (GO:0030027);; Biological Process: lamellipodium assembly (GO:0030032);; Biological Process: actin cytoskeleton reorganization (GO:0031532);; Biological Process: establishment or maintenance of cell polarity regulatin…	K06275|0|chx:102175280|K06275 parvin | (RefSeq) PARVB; parvin beta	Focal adhesion (ko04510)	[Z]	Cytoskeleton	Calponin homology (CH) domain	--	Z	Cytoskeleton	PREDICTED: beta-parvin isoform X4 [Ovis aries musimon]	molecular function: binding (GO:0005488);; cellular component: cell junction (GO:0030054);; biological process: biological adhesion (GO:0022610);; cellular component: cell (GO:0005623);; cellular component: cell part (GO:0044464);; biological process: cellular process (GO:0009987);; biological process: single-organism process (GO:0044699);; biological process: cellular component organization or b…
gene-PAX7	2.16847	1.72603	1.38971	1.97087	0.96987	0.592896	1.1321	0.601853	1.49052	1.06219	1.0052	0.939178	-0.0890181	normal	0.0215498	-0.811241	down	0.357557	-0.41936	normal	--	--	Molecular Function: transcription factor activity, RNA polymerase II core promoter sequence-specific (GO:0000983);; Cellular Component: nucleus (GO:0005634);; Biological Process: chromatin remodeling (GO:0006338);; Biological Process: regulation of cell fate commitment (GO:0010453);; Biological Process: skeletal muscle satellite cell commitment (GO:0014813);; Biological Process: spinal cord assoc…	K09381|0|fca:101088765|K09381 paired box protein 3/7 | (RefSeq) PAX7; paired box 7	--	[K]	Transcription	'Paired box' domain;; Homeobox domain;; Paired box protein 7;; Homeobox KN domain	Paired box protein Pax-6 OS=Bos taurus OX=9913 GN=PAX6 PE=2 SV=1	K	Transcription	PREDICTED: paired box protein Pax-7 isoform X1 [Capra hircus]	molecular function: nucleic acid binding transcription factor activity (GO:0001071);; biological process: biological regulation (GO:0065007);; cellular component: cell (GO:0005623);; cellular component: organelle (GO:0043226);; cellular component: cell part (GO:0044464);; biological process: cellular process (GO:0009987);; biological process: cellular component organization or biogenesis (GO:0071…
gene-PCDH1	2.73947	3.03211	2.18765	1.57082	1.75076	1.1661	1.95533	1.20431	1.54166	1.85217	1.59657	0.304232	-0.458667	normal	0.00212678	-0.80151	down	0.136804	-0.548751	normal	[U]	Intracellular trafficking, secretion, and vesicular transport	Molecular Function: calcium ion binding (GO:0005509);; Cellular Component: plasma membrane (GO:0005886);; Biological Process: homophilic cell adhesion via plasma membrane adhesion molecules (GO:0007156);; Cellular Component: integral component of membrane (GO:0016021);;	K16498|0|phd:102315271|K16498 protocadherin delta 1 | (RefSeq) PCDH1; protocadherin 1	--	--	--	Cadherin domain;; Protocadherin;; Cadherin-like;; Cadherin-like	Protocadherin-11 X-linked OS=Gorilla gorilla gorilla OX=9595 GN=PCDH11X PE=3 SV=1	U	Intracellular trafficking, secretion, and vesicular transport	PREDICTED: protocadherin-1 isoform X2 [Ovis aries musimon]	molecular function: binding (GO:0005488);; cellular component: cell (GO:0005623);; cellular component: membrane (GO:0016020);; cellular component: cell part (GO:0044464);; biological process: biological adhesion (GO:0022610);; cellular component: membrane part (GO:0044425)
gene-PDIA5	4.73986	3.98761	4.00402	2.30953	3.52933	2.0888	2.64911	2.27895	2.44915	3.12787	3.87907	0.593341	-0.323765	normal	0.0472124	-0.616155	down	0.616411	-0.281412	normal	[O]	Posttranslational modification, protein turnover, chaperones	Molecular Function: protein disulfide isomerase activity (GO:0003756);; Cellular Component: endoplasmic reticulum lumen (GO:0005788);; Biological Process: protein folding (GO:0006457);; Cellular Component: integral component of membrane (GO:0016021);; Biological Process: response to endoplasmic reticulum stress (GO:0034976);; Biological Process: cell redox homeostasis (GO:0045454);;	K09583|0|oas:100302347|K09583 protein disulfide isomerase family A, member 5 [EC:5.3.4.1] | (RefSeq) PDIA5; protein disulfide isomerase family A member 5	--	[O]	Posttranslational modification, protein turnover, chaperones	Thioredoxin;; Thioredoxin-like domain;; Thioredoxin-like;; AhpC/TSA family;; OST3 / OST6 family, transporter family;; Thioredoxin-like;; Redoxin;; Thioredoxin-like domain;; F plasmid transfer operon protein;; Thioredoxin	Protein disulfide-isomerase A5 OS=Bos taurus OX=9913 GN=PDIA5 PE=2 SV=1	O	Posttranslational modification, protein turnover, chaperones	protein disulfide-isomerase A5 precursor [Ovis aries]	molecular function: catalytic activity (GO:0003824);; cellular component: cell (GO:0005623);; cellular component: membrane-enclosed lumen (GO:0031974);; cellular component: organelle (GO:0043226);; cellular component: organelle part (GO:0044422);; cellular component: cell part (GO:0044464);; biological process: cellular process (GO:0009987);; cellular component: membrane (GO:0016020);; cellular c…
gene-PIK3CG	0.935329	0.945931	0.879318	0.205079	0.58704	0.446346	0.392445	0.277861	0.559921	0.534136	0.555822	0.323823	-0.566567	normal	0.0293468	-0.820075	down	0.243397	-0.517627	normal	--	--	Biological Process: angiogenesis (GO:0001525);; Biological Process: immune system process (GO:0002376);; Molecular Function: protein serine/threonine kinase activity (GO:0004674);; Molecular Function: ATP binding (GO:0005524);; Cellular Component: cytoplasm (GO:0005737);; Cellular Component: plasma membrane (GO:0005886);; Cellular Component: phosphatidylinositol 3-kinase complex, class IB (GO:000…	K21289|0|oas:101102896|K21289 phosphatidylinositol-4,5-bisphosphate 3-kinase catalytic subunit gamma [EC:2.7.1.153] | (RefSeq) PIK3CG; phosphatidylinositol-4,5-bisphosphate 3-kinase catalytic subunit gamma	Inositol phosphate metabolism (ko00562);; EGFR tyrosine kinase inhibitor resistance (ko01521);; Endocrine resistance (ko01522);; Platinum drug resistance (ko01524);; ErbB signaling pathway (ko04012);; Ras signaling pathway (ko04014);; Rap1 signaling pathway (ko04015);; cGMP-PKG signaling pathway (ko04022);; cAMP signaling pathway (ko04024);; Chemokine signaling pathway (ko04062);; HIF-1 signaling…	[T]	Signal transduction mechanisms	Phosphoinositide 3-kinase family, accessory domain (PIK domain);; Phosphatidylinositol 3- and 4-kinase;; PI3-kinase family, ras-binding domain;; Phosphoinositide 3-kinase C2	Phosphatidylinositol 4,5-bisphosphate 3-kinase catalytic subunit gamma isoform OS=Sus scrofa OX=9823 GN=PIK3CG PE=1 SV=2	BDLTU	Chromatin structure and dynamics;; Cell cycle control, cell division, chromosome partitioning;; Replication, recombination and repair;; Signal transduction mechanisms;; Intracellular trafficking, secretion, and vesicular transport	PREDICTED: phosphatidylinositol 4,5-bisphosphate 3-kinase catalytic subunit gamma isoform [Ovis aries]	biological process: developmental process (GO:0032502);; biological process: single-organism process (GO:0044699);; biological process: immune system process (GO:0002376);; molecular function: catalytic activity (GO:0003824);; biological process: metabolic process (GO:0008152);; biological process: cellular process (GO:0009987);; molecular function: binding (GO:0005488);; cellular component: cell…
gene-PLA1A	0.4114	0.69925	0.312251	0.050487	0.200298	0.043168	0.094658	0.080538	0.508188	0.213083	0.258848	0.296729	-0.567397	normal	0.000788406	-1.2082	down	0.757595	-0.23074	normal	--	--	Cellular Component: acrosomal membrane (GO:0002080);; Molecular Function: phosphatidylcholine 1-acylhydrolase activity (GO:0008970);; Biological Process: lipid catabolic process (GO:0016042);; Cellular Component: extracellular exosome (GO:0070062);;	K13618|0|oas:101106480|K13618 phospholipase A1 member A [EC:3.1.1.-] | (RefSeq) PLA1A; phospholipase A1 member A	Ras signaling pathway (ko04014)	--	--	Lipase	Phospholipase A1 member A OS=Bos taurus OX=9913 GN=PLA1A PE=2 SV=1	O	Posttranslational modification, protein turnover, chaperones	PREDICTED: phospholipase A1 member A isoform X1 [Bos taurus]	cellular component: cell (GO:0005623);; cellular component: membrane (GO:0016020);; cellular component: organelle (GO:0043226);; cellular component: organelle part (GO:0044422);; cellular component: cell part (GO:0044464);; molecular function: catalytic activity (GO:0003824);; biological process: metabolic process (GO:0008152);; biological process: single-organism process (GO:0044699);; cellular …
gene-PNMA1	0.487137	0.615571	0.61001	0.204236	0.400764	0.147557	0.212367	0.121435	0.796363	0.25876	0.498662	0.571027	-0.393367	normal	0.0224767	-0.931182	down	0.947936	-0.0645435	normal	--	--	Biological Process: inflammatory response to antigenic stimulus (GO:0002437);; Cellular Component: nucleolus (GO:0005730);; Cellular Component: cytoplasm (GO:0005737);; Cellular Component: focal adhesion (GO:0005925);;	--	--	--	--	PNMA	Paraneoplastic antigen Ma1 homolog OS=Bos taurus OX=9913 GN=PNMA1 PE=2 SV=1	S	Function unknown	PREDICTED: paraneoplastic antigen Ma1 [Ovis aries]	biological process: immune system process (GO:0002376);; biological process: response to stimulus (GO:0050896);; cellular component: cell (GO:0005623);; cellular component: organelle (GO:0043226);; cellular component: organelle part (GO:0044422);; cellular component: cell part (GO:0044464);; cellular component: cell junction (GO:0030054)
gene-RUNDC3B	1.27005	1.27412	0.949386	0.859044	0.959609	0.324754	0.35944	0.542563	0.378262	0.832065	0.519977	0.85447	-0.169287	normal	0.0128037	-0.920006	down	0.243397	-0.579528	normal	--	--	--	--	--	[T]	Signal transduction mechanisms	RUN domain	RUN domain-containing protein 3B OS=Pongo abelii OX=9601 GN=RUNDC3B PE=2 SV=1	S	Function unknown	PREDICTED: RUN domain-containing protein 3B isoform X2 [Capra hircus]	--
gene-SDC1	0.846456	0.685131	0.71261	0.350089	0.502315	0.221106	0.293258	0.319089	0.428821	0.442398	0.302542	0.467897	-0.446745	normal	0.0225048	-0.869649	down	0.225741	-0.581816	normal	--	--	Molecular Function: protein binding (GO:0001948);; Cellular Component: cytoplasm (GO:0005737);; Cellular Component: focal adhesion (GO:0005925);; Molecular Function: protein C-terminus binding (GO:0008022);; Cellular Component: external side of plasma membrane (GO:0009897);; Cellular Component: integral component of membrane (GO:0016021);; Biological Process: cell migration (GO:0016477);; Biologi…	K06257|2.87969e-144|chx:102185011|K06257 syndecan 1 | (RefSeq) SDC1; syndecan 1	ECM-receptor interaction (ko04512);; Cell adhesion molecules (CAMs) (ko04514);; Malaria (ko05144);; Proteoglycans in cancer (ko05205)	--	--	Syndecan domain	Syndecan-1 OS=Bos taurus OX=9913 GN=SDC1 PE=2 SV=1	U	Intracellular trafficking, secretion, and vesicular transport	PREDICTED: syndecan-1 isoform X2 [Ovis aries musimon]	cellular component: cell (GO:0005623);; cellular component: cell part (GO:0044464);; cellular component: cell junction (GO:0030054);; molecular function: binding (GO:0005488);; cellular component: membrane (GO:0016020);; cellular component: membrane part (GO:0044425);; biological process: cellular process (GO:0009987);; biological process: locomotion (GO:0040011);; biological process: single-orga…
gene-SEMA3G	10.3393	9.50636	9.29565	8.70326	8.65576	4.49453	6.51251	5.85661	8.01709	8.88933	5.6982	0.950793	-0.0446867	normal	0.00526326	-0.605049	down	0.518152	-0.280865	normal	--	--	Biological Process: neural crest cell migration (GO:0001755);; Cellular Component: extracellular space (GO:0005615);; Molecular Function: semaphorin receptor binding (GO:0030215);; Biological Process: positive regulation of cell migration (GO:0030335);; Molecular Function: neuropilin binding (GO:0038191);; Molecular Function: chemorepellent activity (GO:0045499);; Biological Process: negative reg…	K06840|0|oas:101111838|K06840 semaphorin 3 | (RefSeq) SEMA3G; semaphorin 3G	Axon guidance (ko04360)	[T]	Signal transduction mechanisms	Sema domain;; Immunoglobulin domain	Semaphorin-3C OS=Bos taurus OX=9913 GN=SEMA3C PE=2 SV=1	S	Function unknown	PREDICTED: semaphorin-3G isoform X3 [Ovis aries musimon]	biological process: cellular process (GO:0009987);; biological process: locomotion (GO:0040011);; biological process: single-organism process (GO:0044699);; biological process: localization (GO:0051179);; cellular component: extracellular region (GO:0005576);; cellular component: extracellular region part (GO:0044421);; molecular function: binding (GO:0005488);; biological process: biological reg…
gene-SLITRK2	0.612457	0.610287	0.639394	0.242653	0.362101	0.177776	0.172037	0.171645	0.323955	0.274523	0.2501	0.121133	-0.668433	normal	1.45e-06	-1.30926	down	0.00977144	-0.843329	down	--	--	Biological Process: axonogenesis (GO:0007409);; Cellular Component: integral component of membrane (GO:0016021);; Biological Process: positive regulation of synapse assembly (GO:0051965);;	--	--	--	--	Leucine rich repeat;; Leucine rich repeats (6 copies);; Leucine Rich repeats (2 copies);; Leucine Rich Repeat	SLIT and NTRK-like protein 1 OS=Pongo abelii OX=9601 GN=SLITRK1 PE=2 SV=1	S	Function unknown	PREDICTED: SLIT and NTRK-like protein 2 [Ovis aries]	biological process: cellular process (GO:0009987);; biological process: multicellular organismal process (GO:0032501);; biological process: developmental process (GO:0032502);; biological process: single-organism process (GO:0044699);; biological process: cellular component organization or biogenesis (GO:0071840);; cellular component: membrane (GO:0016020);; cellular component: membrane part (GO:…
gene-SNX24	1.51907	1.80039	1.65428	1.5508	1.00898	0.680128	0.948454	0.665959	1.78854	1.1905	1.54561	0.854931	-0.175726	normal	0.031851	-0.758897	down	0.925283	-0.0784799	normal	--	--	Molecular Function: phosphatidylinositol-5-phosphate binding (GO:0010314);; Biological Process: protein transport (GO:0015031);; Cellular Component: cytoplasmic vesicle membrane (GO:0030659);; Molecular Function: phosphatidylinositol-3-phosphate binding (GO:0032266);; Molecular Function: phosphatidylinositol-4-phosphate binding (GO:0070273);;	K17941|2.38087e-110|ssc:100526158|K17941 sorting nexin-22/24 | (RefSeq) SNX24; sorting nexin 24	--	[ZUD]	Cytoskeleton;; Intracellular trafficking, secretion, and vesicular transport;; Cell cycle control, cell division, chromosome partitioning	PX domain	Sorting nexin-24 OS=Bos taurus OX=9913 GN=SNX24 PE=2 SV=1	U	Intracellular trafficking, secretion, and vesicular transport	PREDICTED: sorting nexin-24 isoform X1 [Ovis aries musimon]	molecular function: binding (GO:0005488);; biological process: localization (GO:0051179);; cellular component: cell (GO:0005623);; cellular component: membrane (GO:0016020);; cellular component: organelle (GO:0043226);; cellular component: organelle part (GO:0044422);; cellular component: cell part (GO:0044464)
gene-SPRY3	0.253583	0.184001	0.224721	0.067082	0.091228	0.056757	0.045897	0.018746	0.084153	0.096119	0.128326	0.299417	-0.585519	normal	0.0256671	-0.913967	down	0.377996	-0.485057	normal	--	--	Biological Process: regulation of signal transduction (GO:0009966);; Cellular Component: membrane (GO:0016020);; Biological Process: axon development (GO:0061564);;	K17384|1.36446e-166|oas:101106569|K17384 protein sprouty homolog 3 | (RefSeq) SPRY3; sprouty RTK signaling antagonist 3	--	--	--	Sprouty protein (Spry)	Protein sprouty homolog 2 OS=Bos taurus OX=9913 GN=SPRY2 PE=2 SV=1	S	Function unknown	PREDICTED: protein sprouty homolog 3 [Ovis aries]	biological process: biological regulation (GO:0065007);; cellular component: membrane (GO:0016020);; biological process: cellular process (GO:0009987);; biological process: multicellular organismal process (GO:0032501);; biological process: developmental process (GO:0032502);; biological process: single-organism process (GO:0044699);; biological process: cellular component organization or biogene…
gene-SPSB2	2.60503	1.99772	1.33855	1.20262	1.09572	0.538762	1.01808	0.64163	1.75969	1.50648	1.52609	0.597737	-0.365721	normal	0.0102571	-0.957569	down	0.731584	-0.233071	normal	--	--	Cellular Component: intracellular (GO:0005622);; Biological Process: intracellular signal transduction (GO:0035556);;	K10344|1.91741e-164|bta:613651|K10344 SPRY domain-containing SOCS box protein 2 | (RefSeq) SPSB2; splA/ryanodine receptor domain and SOCS box containing 2	--	[R]	General function prediction only	SPRY domain	SPRY domain-containing SOCS box protein 1 OS=Bos taurus OX=9913 GN=SPSB1 PE=2 SV=1	O	Posttranslational modification, protein turnover, chaperones	PREDICTED: SPRY domain-containing SOCS box protein 2 isoform X1 [Ovis aries musimon]	cellular component: cell (GO:0005623);; cellular component: cell part (GO:0044464);; biological process: cellular process (GO:0009987);; biological process: signaling (GO:0023052);; biological process: single-organism process (GO:0044699);; biological process: response to stimulus (GO:0050896);; biological process: biological regulation (GO:0065007)
gene-ST8SIA2	0.277358	0.448159	0.298095	0.18001	0.207817	0.071313	0.041054	0.110726	0.199965	0.076727	0.259981	0.590131	-0.378626	normal	0.0229955	-0.932564	down	0.491226	-0.408039	normal	--	--	Biological Process: ganglioside biosynthetic process (GO:0001574);; Molecular Function: alpha-N-acetylneuraminate alpha-2,8-sialyltransferase activity (GO:0003828);; Cellular Component: early endosome (GO:0005769);; Biological Process: N-glycan processing (GO:0006491);; Cellular Component: integral component of Golgi membrane (GO:0030173);; Cellular Component: recycling endosome (GO:0055037);; Bi…	K06612|0|chx:102174878|K06612 alpha-N-acetyl-neuraminate alpha-2,8-sialyltransferase (sialyltransferase 8B) [EC:2.4.99.-] | (RefSeq) ST8SIA2; ST8 alpha-N-acetyl-neuraminide alpha-2,8-sialyltransferase 2	--	[G]	Carbohydrate transport and metabolism	Glycosyltransferase family 29 (sialyltransferase)	Alpha-2,8-sialyltransferase 8B OS=Pan troglodytes OX=9598 GN=ST8SIA2 PE=2 SV=1	S	Function unknown	PREDICTED: alpha-2,8-sialyltransferase 8B [Capra hircus]	biological process: metabolic process (GO:0008152);; biological process: cellular process (GO:0009987);; biological process: single-organism process (GO:0044699);; molecular function: catalytic activity (GO:0003824);; cellular component: cell (GO:0005623);; cellular component: organelle (GO:0043226);; cellular component: cell part (GO:0044464);; cellular component: membrane (GO:0016020);; cellula…
gene-ST8SIA4	6.03842	6.38704	5.78996	3.3979	4.6726	3.47643	2.59342	3.18029	3.47152	4.76635	4.06114	0.304903	-0.411161	normal	0.0224874	-0.689914	down	0.232326	-0.440716	normal	--	--	Biological Process: ganglioside biosynthetic process (GO:0001574);; Molecular Function: alpha-N-acetylneuraminate alpha-2,8-sialyltransferase activity (GO:0003828);; Biological Process: N-glycan processing (GO:0006491);; Cellular Component: integral component of Golgi membrane (GO:0030173);; Biological Process: sialylation (GO:0097503);;	K06614|0|aml:100481666|K06614 alpha-N-acetyl-neuraminate alpha-2,8-sialyltransferase (sialyltransferase 8D) [EC:2.4.99.-] | (RefSeq) ST8SIA4; ST8 alpha-N-acetyl-neuraminide alpha-2,8-sialyltransferase 4	--	[G]	Carbohydrate transport and metabolism	Glycosyltransferase family 29 (sialyltransferase)	CMP-N-acetylneuraminate-poly-alpha-2,8-sialyltransferase OS=Bos taurus OX=9913 GN=ST8SIA4 PE=2 SV=1	S	Function unknown	LOW QUALITY PROTEIN: CMP-N-acetylneuraminate-poly-alpha-2,8-sialyltransferase [Odocoileus virginianus texanus]	biological process: metabolic process (GO:0008152);; biological process: cellular process (GO:0009987);; biological process: single-organism process (GO:0044699);; molecular function: catalytic activity (GO:0003824);; cellular component: cell (GO:0005623);; cellular component: membrane (GO:0016020);; cellular component: organelle (GO:0043226);; cellular component: organelle part (GO:0044422);; ce…
gene-TET1	1.04157	1.06898	0.926407	0.591806	0.667743	0.508616	0.560377	0.615613	0.67655	0.729747	0.618506	0.171419	-0.491069	normal	0.0266014	-0.620409	down	0.173514	-0.470092	normal	--	--	Molecular Function: iron ion binding (GO:0005506);; Molecular Function: zinc ion binding (GO:0008270);; Biological Process: positive regulation of cell proliferation (GO:0008284);; Biological Process: positive regulation of histone methylation (GO:0031062);; Molecular Function: DNA binding (GO:0043566);; Biological Process: oxidation-reduction process (GO:0055114);; Molecular Function: methylcyto…	K13097|0|oas:101103534|K13097 methylcytosine dioxygenase [EC:1.14.11.-] | (RefSeq) TET1; tet methylcytosine dioxygenase 1	--	--	--	Oxygenase domain of the 2OGFeDO superfamily;; CXXC zinc finger domain	CXXC-type zinc finger protein 5 OS=Pongo abelii OX=9601 GN=CXXC5 PE=2 SV=1	S	Function unknown	PREDICTED: methylcytosine dioxygenase TET1 isoform X1 [Ovis aries musimon]	molecular function: binding (GO:0005488);; biological process: biological regulation (GO:0065007);; biological process: metabolic process (GO:0008152);; biological process: single-organism process (GO:0044699);; molecular function: catalytic activity (GO:0003824);; biological process: cellular process (GO:0009987)
gene-TLR4	2.04787	2.0891	1.95864	1.4778	1.35823	0.886009	1.22014	1.05677	1.65171	2.01938	1.60417	0.338843	-0.438235	normal	0.0482328	-0.634291	down	0.804822	-0.15474	normal	[K]	Transcription	Biological Process: activation of MAPK activity (GO:0000187);; Molecular Function: lipopolysaccharide binding (GO:0001530);; Molecular Function: lipopolysaccharide receptor activity (GO:0001875);; Biological Process: B cell proliferation involved in immune response (GO:0002322);; Biological Process: nitric oxide production involved in inflammatory response (GO:0002537);; Biological Process: regul…	K10160|0|oas:554263|K10160 toll-like receptor 4 | (RefSeq) TLR4; toll like receptor 4	NF-kappa B signaling pathway (ko04064);; HIF-1 signaling pathway (ko04066);; Phagosome (ko04145);; PI3K-Akt signaling pathway (ko04151);; Toll-like receptor signaling pathway (ko04620);; Salmonella infection (ko05132);; Pertussis (ko05133);; Legionellosis (ko05134);; Leishmaniasis (ko05140);; Chagas disease (American trypanosomiasis) (ko05142);; Malaria (ko05144);; Toxoplasmosis (ko05145);; Amoeb…	[T]	Signal transduction mechanisms	TIR domain;; Leucine rich repeat;; Leucine Rich repeats (2 copies);; TIR domain;; Leucine Rich Repeat;; MTH538 TIR-like domain (DUF1863)	Toll-like receptor 4 OS=Bos taurus OX=9913 GN=TLR4 PE=1 SV=2	S	Function unknown	toll-like receptor 4 precursor [Ovis aries]	biological process: biological regulation (GO:0065007);; molecular function: binding (GO:0005488);; molecular function: signal transducer activity (GO:0004871);; molecular function: molecular transducer activity (GO:0060089);; biological process: immune system process (GO:0002376);; biological process: cellular process (GO:0009987);; biological process: signaling (GO:0023052);; biological process…
gene-TMEM119	1.50954	1.26972	0.674437	0.469944	0.511249	0.221432	0.440443	0.136923	0.470375	0.690114	0.424174	0.339894	-0.552267	normal	0.0127036	-0.992213	down	0.255031	-0.579799	normal	--	--	Cellular Component: endoplasmic reticulum (GO:0005783);; Cellular Component: plasma membrane (GO:0005886);; Cellular Component: integral component of membrane (GO:0016021);; Biological Process: positive regulation of bone mineralization (GO:0030501);; Biological Process: positive regulation of osteoblast proliferation (GO:0033690);; Biological Process: positive regulation of osteoblast differenti…	--	--	--	--	TMEM119 family	--	S	Function unknown	PREDICTED: transmembrane protein 119 [Ovis aries musimon]	cellular component: cell (GO:0005623);; cellular component: organelle (GO:0043226);; cellular component: cell part (GO:0044464);; cellular component: membrane (GO:0016020);; cellular component: membrane part (GO:0044425);; biological process: biological regulation (GO:0065007);; biological process: reproduction (GO:0000003);; biological process: cellular process (GO:0009987);; biological process:…
gene-TPX2	3.29372	3.2303	3.42157	3.07453	1.68296	1.12033	2.17208	1.46734	2.22117	2.38605	3.53381	0.703246	-0.26779	normal	0.00258761	-0.803163	down	0.749388	-0.190632	normal	--	--	Cellular Component: spindle pole (GO:0000922);; Cellular Component: nucleoplasm (GO:0005654);; Cellular Component: cytoplasm (GO:0005737);; Cellular Component: microtubule (GO:0005874);; Biological Process: apoptotic process (GO:0006915);; Molecular Function: protein kinase binding (GO:0019901);; Biological Process: activation of protein kinase activity (GO:0032147);; Cellular Component: axon hil…	K16812|0|oas:101102581|K16812 targeting protein for Xklp2 | (RefSeq) TPX2; TPX2, microtubule nucleation factor	--	--	--	Cell cycle regulated microtubule associated protein;; Aurora-A binding;; Targeting protein for Xklp2 (TPX2)	Targeting protein for Xklp2 OS=Bos taurus OX=9913 GN=TPX2 PE=2 SV=1	S	Function unknown	PREDICTED: targeting protein for Xklp2 isoform X1 [Ovis aries]	cellular component: cell (GO:0005623);; cellular component: organelle (GO:0043226);; cellular component: organelle part (GO:0044422);; cellular component: cell part (GO:0044464);; cellular component: supramolecular complex (GO:0099080);; biological process: cellular process (GO:0009987);; biological process: single-organism process (GO:0044699);; molecular function: binding (GO:0005488);; biologi…
gene-ZNF569	3.0618	3.02752	2.81342	2.57122	2.16279	1.02512	1.67928	1.36299	3.48387	2.67392	1.95087	0.838046	-0.168081	normal	0.00971609	-0.806835	down	0.915825	-0.084715	normal	[R]	General function prediction only	Molecular Function: nucleic acid binding (GO:0003676);; Cellular Component: intracellular (GO:0005622);; Biological Process: regulation of transcription, DNA-templated (GO:0006355);; Molecular Function: metal ion binding (GO:0046872);;	K09228|0|oas:101103915|K09228 KRAB domain-containing zinc finger protein | (RefSeq) ZNF569; zinc finger protein 569	--	[R]	General function prediction only	Zinc-finger double domain;; Zinc finger, C2H2 type;; C2H2-type zinc finger;; C2H2-type zinc finger;; KRAB box;; Zinc ribbon domain;; Zinc-finger double-stranded RNA-binding;; zinc-ribbon family;; Double zinc ribbon;; XPA protein N-terminal	Zinc finger protein 182 OS=Pongo abelii OX=9601 GN=ZNF182 PE=2 SV=1	S	Function unknown	PREDICTED: LOW QUALITY PROTEIN: zinc finger protein 569 [Ovis aries musimon]	molecular function: binding (GO:0005488);; cellular component: cell (GO:0005623);; cellular component: cell part (GO:0044464);; biological process: biological regulation (GO:0065007)
