# Supplementary material for: Transcriptomics analysis reveals the effect of Broussonetia papyrifera L. fermented feed on meat quality traits in fattening lamb
Source: PeerJ. 2021 Apr 27;9:e11295. doi: 10.7717/peerj.11295 (PMC8086582; doi:10.7717/peerj.11295)
Supplement: Supplemental Information 6 [file peerj-09-11295-s006.xlsx]

## Sheet: up-regulated
GO_classify2	0%vs6%	0%vs18%	0%vs100%
cellular process	24	43	59
single-organism process	18	38	52
biological regulation	17	37	51
metabolic process	19	27	41
response to stimulus	9	21	32
multicellular organismal process	3	15	29
signaling	3	13	23
localization	7	9	17
developmental process	3	14	25
cellular component organization or biogenesis	7	11	17
immune system process	0	6	7
multi-organism process	1	2	4
reproduction	0	1	2
reproductive process	0	1	2
locomotion	1	0	8
biological adhesion	0	1	4
cell	24	49	62
cell part	24	49	62
organelle	27	46	48
membrane	18	24	30
membrane part	14	16	16
organelle part	15	23	21
macromolecular complex	3	9	15
extracellular region	9	13	9
extracellular region part	9	13	8
membrane-enclosed lumen	6	15	16
cell junction	1	2	5
binding	15	35	53
catalytic activity	15	23	27
signal transducer activity	0	2	7
molecular transducer activity	0	1	6
transporter activity	4	5	5
molecular function regulator	1	1	5
nucleic acid binding transcription factor activity	1	8	11
structural molecule activity	3	4	2

## Sheet: down-regulated
GO_classify2	0%vs6%	0%vs18%	0%vs100%
cellular process	35	54	109
single-organism process	32	56	113
biological regulation	30	61	103
metabolic process	15	31	55
response to stimulus	18	40	66
multicellular organismal process	20	28	64
signaling	16	28	51
localization	13	25	36
developmental process	20	26	55
cellular component organization or biogenesis	18	21	34
immune system process	5	17	22
multi-organism process	2	7	15
reproduction	3	5	8
reproductive process	3	5	8
locomotion	7	12	9
biological adhesion	6	14	17
cell	34	62	113
cell part	34	62	112
organelle	25	52	80
membrane	25	39	83
membrane part	22	33	70
organelle part	11	24	33
macromolecular complex	12	14	33
extracellular region	19	32	49
extracellular region part	19	31	45
membrane-enclosed lumen	5	14	12
cell junction	5	8	12
binding	30	60	105
catalytic activity	13	23	44
signal transducer activity	7	13	15
molecular transducer activity	7	13	18
transporter activity	5	4	13
molecular function regulator	3	10	5
nucleic acid binding transcription factor activity	4	6	8
structural molecule activity	2	3	2
