# Supplementary material for: Transcriptomics analysis reveals the effect of Broussonetia papyrifera L. fermented feed on meat quality traits in fattening lamb
Source: PeerJ. 2021 Apr 27;9:e11295. doi: 10.7717/peerj.11295 (PMC8086582; doi:10.7717/peerj.11295)
Supplement: Supplemental Information 7 [file peerj-09-11295-s007.xlsx]

## Sheet: up-regulated
#KEGG_n	75	KEGG_N	8364
#Pathway	ko_ID	Selected_gene_in_Pathway	AllGene_in_Pathway	Selected_gene_in_All_pathways	AllGene_in_All_pathways	Gene_id	KEGG_Orthology
Aldosterone synthesis and secretion	ko04925	2	78	75	8364	gene-CREB5;gene-NR4A2	K09047+K08558
T cell receptor signaling pathway	ko04660	1	114	75	8364	gene-NFKBIA	K04734
Synaptic vesicle cycle	ko04721	1	62	75	8364	gene-ATP6V0E2	K02153
Tight junction	ko04530	1	141	75	8364	gene-AMOTL1	K06104
Legionellosis	ko05134	1	80	75	8364	gene-NFKBIA	K04734
Retrograde endocannabinoid signaling	ko04723	1	103	75	8364	gene-NAPEPLD	K13985
Alanine, aspartate and glutamate metabolism	ko00250	1	40	75	8364	gene-GOT1	K14454
Phospholipase D signaling pathway	ko04072	1	154	75	8364	gene-AGPAT2	K13509
Phenylalanine metabolism	ko00360	2	23	75	8364	gene-GOT1;gene-MAOB	K14454+K00274
Chemical carcinogenesis	ko05204	1	95	75	8364	gene-CYP1A1	K07408
Nicotinate and nicotinamide metabolism	ko00760	2	35	75	8364	gene-NMNAT3;gene-NMRK2	K06210+K10524
Bladder cancer	ko05219	1	39	75	8364	gene-MYC	K04377
Glycerolipid metabolism	ko00561	4	67	75	8364	Ovis_aries_newGene_5239;gene-AGPAT2;gene-LPIN1;gene-PNPLA2	K14085+K13509+K15728+K16816
Insulin secretion	ko04911	1	84	75	8364	gene-CREB5	K09047
Steroid hormone biosynthesis	ko00140	2	84	75	8364	gene-CYP1A1;gene-LOC101110434	K07408+K04119
Non-alcoholic fatty liver disease (NAFLD)	ko04932	2	169	75	8364	gene-IRS2;gene-NDUFA5	K07187+K03949
Type II diabetes mellitus	ko04930	1	50	75	8364	gene-IRS2	K07187
Morphine addiction	ko05032	1	97	75	8364	gene-PDE7A	K18436
Allograft rejection	ko05330	2	64	75	8364	gene-LOC101104866;gene-LOC114109642	K06751+K06751
Toll-like receptor signaling pathway	ko04620	1	121	75	8364	gene-NFKBIA	K04734
Rheumatoid arthritis	ko05323	1	106	75	8364	gene-ATP6V0E2	K02153
Fatty acid metabolism	ko01212	3	59	75	8364	gene-ACADVL;gene-ACSL1;gene-ECHS1	K09479+K01897+K07511
Insulin signaling pathway	ko04910	1	149	75	8364	gene-IRS2	K07187
HTLV-I infection	ko05166	6	294	75	8364	gene-LOC101104866;gene-LOC114109642;gene-LOC114116592;gene-MYC;gene-NFKBIA;gene-SLC25A4	K06751+K06751+K05862+K04377+K04734+K05863
PPAR signaling pathway	ko03320	4	83	75	8364	gene-ACSL1;gene-AQP7;gene-FABP3;gene-PLIN5	K01897+K08771+K08752+K20255
Amphetamine addiction	ko05031	2	64	75	8364	gene-CREB5;gene-MAOB	K09047+K00274
cAMP signaling pathway	ko04024	3	220	75	8364	gene-ADRB2;gene-CREB5;gene-NFKBIA	K04142+K09047+K04734
Carbon metabolism	ko01200	3	126	75	8364	gene-ECHS1;gene-GOT1;gene-MTHFR	K07511+K14454+K00297
Adipocytokine signaling pathway	ko04920	3	75	75	8364	gene-ACSL1;gene-IRS2;gene-NFKBIA	K01897+K07187+K04734
Natural killer cell mediated cytotoxicity	ko04650	1	159	75	8364	gene-LOC114116088	K07986
cGMP-PKG signaling pathway	ko04022	6	173	75	8364	gene-ADRA2B;gene-ADRB2;gene-CREB5;gene-IRS2;gene-LOC114116592;gene-SLC25A4	K04139+K04142+K09047+K07187+K05862+K05863
Neuroactive ligand-receptor interaction	ko04080	2	308	75	8364	gene-ADRA2B;gene-ADRB2	K04139+K04142
Graft-versus-host disease	ko05332	2	53	75	8364	gene-LOC101104866;gene-LOC114109642	K06751+K06751
Focal adhesion	ko04510	2	213	75	8364	gene-PARVB;gene-VEGFB	K06275+K16858
Biosynthesis of unsaturated fatty acids	ko01040	1	29	75	8364	gene-LOC101104407	K01068
Arginine and proline metabolism	ko00330	4	53	75	8364	Ovis_aries_newGene_5239;gene-GOT1;gene-MAOB;gene-NOS1	K14085+K14454+K00274+K13240
Viral myocarditis	ko05416	2	89	75	8364	gene-LOC101104866;gene-LOC114109642	K06751+K06751
Hepatitis B	ko05161	3	168	75	8364	gene-CREB5;gene-MYC;gene-NFKBIA	K09047+K04377+K04734
Cytosolic DNA-sensing pathway	ko04623	1	73	75	8364	gene-NFKBIA	K04734
FoxO signaling pathway	ko04068	3	143	75	8364	gene-GADD45G;gene-IRS2;gene-SGK1	K04402+K07187+K13302
Serotonergic synapse	ko04726	1	119	75	8364	gene-MAOB	K00274
Dopaminergic synapse	ko04728	2	129	75	8364	gene-CREB5;gene-MAOB	K09047+K00274
AGE-RAGE signaling pathway in diabetic complications	ko04933	2	107	75	8364	gene-SERPINE1;gene-VEGFB	K03982+K16858
Ascorbate and aldarate metabolism	ko00053	1	31	75	8364	Ovis_aries_newGene_5239	K14085
Endometrial cancer	ko05213	1	53	75	8364	gene-MYC	K04377
Herpes simplex infection	ko05168	6	232	75	8364	Ovis_aries_newGene_2385;gene-LOC101104866;gene-LOC114109642;gene-NFKBIA;gene-PER1;gene-PER2	K02633+K06751+K06751+K04734+K02633+K02633
Glycolysis / Gluconeogenesis	ko00010	1	70	75	8364	Ovis_aries_newGene_5239	K14085
Huntington's disease	ko05016	4	214	75	8364	gene-CREB5;gene-LOC114116592;gene-NDUFA5;gene-SLC25A4	K09047+K05862+K03949+K05863
Valine, leucine and isoleucine degradation	ko00280	2	61	75	8364	Ovis_aries_newGene_5239;gene-ECHS1	K14085+K07511
Type I diabetes mellitus	ko04940	2	66	75	8364	gene-LOC101104866;gene-LOC114109642	K06751+K06751
B cell receptor signaling pathway	ko04662	1	81	75	8364	gene-NFKBIA	K04734
Nucleotide excision repair	ko03420	1	70	75	8364	Ovis_aries_newGene_20388	K10838
Arginine biosynthesis	ko00220	2	20	75	8364	gene-GOT1;gene-NOS1	K14454+K13240
Thyroid hormone signaling pathway	ko04919	1	119	75	8364	gene-MYC	K04377
Toxoplasmosis	ko05145	1	143	75	8364	gene-NFKBIA	K04734
Influenza A	ko05164	2	208	75	8364	gene-LOC114116592;gene-NFKBIA	K05862+K04734
Arachidonic acid metabolism	ko00590	1	92	75	8364	gene-LOC101110434	K04119
Fatty acid degradation	ko00071	5	54	75	8364	Ovis_aries_newGene_5239;gene-ACADVL;gene-ACSL1;gene-ECHS1;gene-ECI1	K14085+K09479+K01897+K07511+K13238
Central carbon metabolism in cancer	ko05230	2	65	75	8364	gene-MYC;gene-SLC16A3	K04377+K08180
Retinol metabolism	ko00830	1	75	75	8364	gene-CYP1A1	K07408
Prostate cancer	ko05215	2	91	75	8364	gene-CREB5;gene-NFKBIA	K09047+K04734
Inflammatory bowel disease (IBD)	ko05321	1	77	75	8364	gene-RORC	K08534
Cholinergic synapse	ko04725	1	114	75	8364	gene-CREB5	K09047
NF-kappa B signaling pathway	ko04064	1	105	75	8364	gene-NFKBIA	K04734
Cell cycle	ko04110	2	132	75	8364	gene-GADD45G;gene-MYC	K04402+K04377
Circadian rhythm	ko04710	4	32	75	8364	Ovis_aries_newGene_2385;gene-PER1;gene-PER2;gene-RORC	K02633+K02633+K02633+K08534
Glycosphingolipid biosynthesis - lacto and neolacto series	ko00601	1	29	75	8364	gene-ST3GAL6	K03792
PI3K-Akt signaling pathway	ko04151	4	389	75	8364	gene-CREB5;gene-MYC;gene-SGK1;gene-VEGFB	K09047+K04377+K13302+K16858
AMPK signaling pathway	ko04152	4	125	75	8364	gene-CREB5;gene-IRS2;gene-MLYCD;gene-PFKFB3	K09047+K07187+K01578+K01103
Jak-STAT signaling pathway	ko04630	1	225	75	8364	gene-MYC	K04377
Colorectal cancer	ko05210	1	71	75	8364	gene-MYC	K04377
Renin secretion	ko04924	1	66	75	8364	gene-ADRB2	K04142
Thyroid cancer	ko05216	1	32	75	8364	gene-MYC	K04377
Butanoate metabolism	ko00650	1	29	75	8364	gene-ECHS1	K07511
Glycine, serine and threonine metabolism	ko00260	2	48	75	8364	Ovis_aries_newGene_5239;gene-MAOB	K14085+K00274
Phagosome	ko04145	4	192	75	8364	gene-ATP6V0E2;gene-LOC101104866;gene-LOC114109642;gene-NOS1	K02153+K06751+K06751+K13240
Glycerophospholipid metabolism	ko00564	3	107	75	8364	gene-AGPAT2;gene-GPD2;gene-LPIN1	K13509+K00111+K15728
Collecting duct acid secretion	ko04966	1	28	75	8364	gene-ATP6V0E2	K02153
Other glycan degradation	ko00511	1	22	75	8364	gene-MAN2C1	K01191
Cysteine and methionine metabolism	ko00270	1	45	75	8364	gene-GOT1	K14454
TNF signaling pathway	ko04668	3	115	75	8364	gene-CEBPB;gene-CREB5;gene-NFKBIA	K10048+K09047+K04734
Estrogen signaling pathway	ko04915	1	102	75	8364	gene-CREB5	K09047
Epstein-Barr virus infection	ko05169	4	215	75	8364	gene-LOC101104866;gene-LOC114109642;gene-MYC;gene-NFKBIA	K06751+K06751+K04377+K04734
Tyrosine metabolism	ko00350	3	42	75	8364	gene-FAH;gene-GOT1;gene-MAOB	K01555+K14454+K00274
Aldosterone-regulated sodium reabsorption	ko04960	1	41	75	8364	gene-SGK1	K13302
Peroxisome	ko04146	3	87	75	8364	gene-ACSL1;gene-DECR2;gene-MLYCD	K01897+K13237+K01578
Pentose and glucuronate interconversions	ko00040	2	40	75	8364	gene-DCXR;gene-LOC105606262	K03331+K03331
Fatty acid biosynthesis	ko00061	1	14	75	8364	gene-ACSL1	K01897
Glucagon signaling pathway	ko04922	3	97	75	8364	Ovis_aries_newGene_26572;gene-CREB5;gene-SIK1	K19008+K09047+K19008
Vitamin digestion and absorption	ko04977	1	25	75	8364	gene-SLC19A2	K14610
Longevity regulating pathway	ko04211	3	95	75	8364	gene-CREB5;gene-IRS2;gene-SESN1	K09047+K07187+K10141
TGF-beta signaling pathway	ko04350	1	87	75	8364	gene-MYC	K04377
Autoimmune thyroid disease	ko05320	2	79	75	8364	gene-LOC101104866;gene-LOC114109642	K06751+K06751
Wnt signaling pathway	ko04310	1	160	75	8364	gene-MYC	K04377
NOD-like receptor signaling pathway	ko04621	1	55	75	8364	gene-NFKBIA	K04734
Signaling pathways regulating pluripotency of stem cells	ko04550	1	149	75	8364	gene-MYC	K04377
Alcoholism	ko05034	2	209	75	8364	gene-CREB5;gene-MAOB	K09047+K00274
Complement and coagulation cascades	ko04610	1	87	75	8364	gene-SERPINE1	K03982
Hepatitis C	ko05160	1	148	75	8364	gene-NFKBIA	K04734
Viral carcinogenesis	ko05203	4	246	75	8364	gene-CREB5;gene-LOC101104866;gene-LOC114109642;gene-NFKBIA	K09047+K06751+K06751+K04734
Neurotrophin signaling pathway	ko04722	1	126	75	8364	gene-NFKBIA	K04734
Lysine degradation	ko00310	3	72	75	8364	Ovis_aries_newGene_22156;Ovis_aries_newGene_5239;gene-ECHS1	K11433+K14085+K07511
Small cell lung cancer	ko05222	2	99	75	8364	gene-MYC;gene-NFKBIA	K04377+K04734
Vasopressin-regulated water reabsorption	ko04962	1	48	75	8364	gene-CREB5	K09047
Vascular smooth muscle contraction	ko04270	1	128	75	8364	gene-RAMP1	K08447
Histidine metabolism	ko00340	2	25	75	8364	Ovis_aries_newGene_5239;gene-MAOB	K14085+K00274
Parkinson's disease	ko05012	3	157	75	8364	gene-LOC114116592;gene-NDUFA5;gene-SLC25A4	K05862+K03949+K05863
Pyruvate metabolism	ko00620	1	40	75	8364	Ovis_aries_newGene_5239	K14085
Propanoate metabolism	ko00640	2	38	75	8364	gene-ECHS1;gene-MLYCD	K07511+K01578
Alzheimer's disease	ko05010	2	182	75	8364	gene-NDUFA5;gene-NOS1	K03949+K13240
Tuberculosis	ko05152	1	223	75	8364	gene-CEBPB	K10048
MicroRNAs in cancer	ko05206	2	159	75	8364	gene-IRS2;gene-MYC	K07187+K04377
Amyotrophic lateral sclerosis (ALS)	ko05014	1	58	75	8364	gene-NOS1	K13240
Ribosome	ko03010	5	266	75	8364	gene-LOC101103232;gene-LOC101110647;gene-MRPL2;gene-MRPL21;gene-RPS3	K02920+K02937+K02886+K02888+K02985
Metabolism of xenobiotics by cytochrome P450	ko00980	1	79	75	8364	gene-CYP1A1	K07408
Chagas disease (American trypanosomiasis)	ko05142	2	122	75	8364	gene-NFKBIA;gene-SERPINE1	K04734+K03982
Nitrogen metabolism	ko00910	1	19	75	8364	gene-CA12	K01672
Long-term depression	ko04730	1	61	75	8364	gene-NOS1	K13240
Salivary secretion	ko04970	2	98	75	8364	gene-ADRB2;gene-NOS1	K04142+K13240
Calcium signaling pathway	ko04020	4	201	75	8364	gene-ADRB2;gene-LOC114116592;gene-NOS1;gene-SLC25A4	K04142+K05862+K13240+K05863
Insulin resistance	ko04931	3	112	75	8364	gene-CREB5;gene-IRS2;gene-NFKBIA	K09047+K07187+K04734
Adrenergic signaling in cardiomyocytes	ko04261	2	154	75	8364	gene-ADRB2;gene-CREB5	K04142+K09047
Transcriptional misregulation in cancer	ko05202	3	180	75	8364	gene-CEBPB;gene-MYC;gene-NR4A3	K10048+K04377+K08559
Ovarian steroidogenesis	ko04913	2	59	75	8364	gene-CYP1A1;gene-LOC101110434	K07408+K04119
Leishmaniasis	ko05140	1	85	75	8364	gene-NFKBIA	K04734
Fructose and mannose metabolism	ko00051	1	35	75	8364	gene-PFKFB3	K01103
Regulation of lipolysis in adipocytes	ko04923	4	59	75	8364	gene-ADRB2;gene-AQP7;gene-IRS2;gene-PNPLA2	K04142+K08771+K07187+K16816
Antigen processing and presentation	ko04612	2	91	75	8364	gene-LOC101104866;gene-LOC114109642	K06751+K06751
Purine metabolism	ko00230	1	189	75	8364	gene-PDE7A	K18436
Circadian entrainment	ko04713	5	99	75	8364	Ovis_aries_newGene_2385;gene-NOS1;gene-PER1;gene-PER2;gene-RASD1	K02633+K13240+K02633+K02633+K07843
mTOR signaling pathway	ko04150	1	165	75	8364	gene-SGK1	K13302
Phenylalanine, tyrosine and tryptophan biosynthesis	ko00400	1	6	75	8364	gene-GOT1	K14454
Endocytosis	ko04144	5	286	75	8364	gene-ADRB2;gene-LOC101104866;gene-LOC114109642;gene-SH3KBP1;gene-VPS37C	K04142+K06751+K06751+K12470+K12185
Longevity regulating pathway - multiple species	ko04213	1	67	75	8364	gene-IRS2	K07187
Acute myeloid leukemia	ko05221	1	59	75	8364	gene-MYC	K04377
Drug metabolism - cytochrome P450	ko00982	1	74	75	8364	gene-MAOB	K00274
Fatty acid elongation	ko00062	2	30	75	8364	gene-ECHS1;gene-LOC101104407	K07511+K01068
Osteoclast differentiation	ko04380	2	140	75	8364	gene-FOSL2;gene-NFKBIA	K09030+K04734
RIG-I-like receptor signaling pathway	ko04622	1	110	75	8364	gene-NFKBIA	K04734
Ras signaling pathway	ko04014	1	243	75	8364	gene-VEGFB	K16858
Cell adhesion molecules (CAMs)	ko04514	2	176	75	8364	gene-LOC101104866;gene-LOC114109642	K06751+K06751
Lysine biosynthesis	ko00300	1	3	75	8364	Ovis_aries_newGene_5239	K14085
p53 signaling pathway	ko04115	3	80	75	8364	gene-GADD45G;gene-SERPINE1;gene-SESN1	K04402+K03982+K10141
Rap1 signaling pathway	ko04015	1	222	75	8364	gene-VEGFB	K16858
Measles	ko05162	1	162	75	8364	gene-NFKBIA	K04734
Biosynthesis of amino acids	ko01230	2	75	75	8364	Ovis_aries_newGene_5239;gene-GOT1	K14085+K14454
HIF-1 signaling pathway	ko04066	2	103	75	8364	gene-PFKFB3;gene-SERPINE1	K01103+K03982
beta-Alanine metabolism	ko00410	3	43	75	8364	Ovis_aries_newGene_5239;gene-ECHS1;gene-MLYCD	K14085+K07511+K01578
Oxidative phosphorylation	ko00190	2	149	75	8364	gene-ATP6V0E2;gene-NDUFA5	K02153+K03949
Chemokine signaling pathway	ko04062	1	189	75	8364	gene-NFKBIA	K04734
Thyroid hormone synthesis	ko04918	1	70	75	8364	gene-CREB5	K09047
Cytokine-cytokine receptor interaction	ko04060	1	288	75	8364	gene-VEGFB	K16858
2-Oxocarboxylic acid metabolism	ko01210	1	18	75	8364	gene-GOT1	K14454
Apoptosis	ko04210	2	153	75	8364	gene-GADD45G;gene-NFKBIA	K04402+K04734
MAPK signaling pathway	ko04010	2	265	75	8364	gene-GADD45G;gene-MYC	K04402+K04377
ErbB signaling pathway	ko04012	1	93	75	8364	gene-MYC	K04377
Hippo signaling pathway	ko04390	2	159	75	8364	gene-MYC;gene-SERPINE1	K04377+K03982
One carbon pool by folate	ko00670	1	19	75	8364	gene-MTHFR	K00297
Proteoglycans in cancer	ko05205	1	218	75	8364	gene-MYC	K04377
Pathways in cancer	ko05200	3	427	75	8364	gene-MYC;gene-NFKBIA;gene-VEGFB	K04377+K04734+K16858
Chronic myeloid leukemia	ko05220	2	78	75	8364	gene-MYC;gene-NFKBIA	K04377+K04734
Tryptophan metabolism	ko00380	4	49	75	8364	Ovis_aries_newGene_5239;gene-CYP1A1;gene-ECHS1;gene-MAOB	K14085+K07408+K07511+K00274
Fat digestion and absorption	ko04975	1	51	75	8364	gene-AGPAT2	K13509
Cocaine addiction	ko05030	2	51	75	8364	gene-CREB5;gene-MAOB	K09047+K00274

## Sheet: down-regulated
#KEGG_n	107	KEGG_N	8364
#Pathway	ko_ID	Selected_gene_in_Pathway	AllGene_in_Pathway	Selected_gene_in_All_pathways	AllGene_in_All_pathways	Gene_id	KEGG_Orthology
Phenylalanine metabolism	ko00360	1	23	107	8364	gene-LOC101112335	K00276
NF-kappa B signaling pathway	ko04064	3	105	107	8364	gene-CCL21;gene-PLAU;gene-TLR4	K16062+K01348+K10160
Arginine biosynthesis	ko00220	1	20	107	8364	gene-NOS2	K13241
Adrenergic signaling in cardiomyocytes	ko04261	4	154	107	8364	gene-ADCY7;gene-CACNG7;gene-PIK3CG;gene-PLCB4	K08047+K04872+K21289+K05858
TGF-beta signaling pathway	ko04350	2	87	107	8364	gene-LTBP1;gene-SP1	K19559+K04684
beta-Alanine metabolism	ko00410	2	43	107	8364	gene-DPYD;gene-LOC101112335	K00207+K00276
Hippo signaling pathway -multiple species	ko04392	1	30	107	8364	gene-FAT4	K16669
Long-term potentiation	ko04720	1	64	107	8364	gene-PLCB4	K05858
Axon guidance	ko04360	6	191	107	8364	gene-EFNB2;gene-EPHB4;gene-PIK3CG;gene-SEMA3G;gene-SEMA6A;gene-SRGAP2	K05463+K05113+K21289+K06840+K06842+K07526
Olfactory transduction	ko04740	1	1110	107	8364	gene-NCALD	K19695
Chagas disease (American trypanosomiasis)	ko05142	4	122	107	8364	gene-NOS2;gene-PIK3CG;gene-PLCB4;gene-TLR4	K13241+K21289+K05858+K10160
Alcoholism	ko05034	1	209	107	8364	gene-LOC101111669	K11251
Oocyte meiosis	ko04114	2	116	107	8364	gene-ADCY7;gene-IGF1	K08047+K05459
RIG-I-like receptor signaling pathway	ko04622	1	110	107	8364	gene-ISG15	K12159
Non-alcoholic fatty liver disease (NAFLD)	ko04932	3	169	107	8364	Ovis_aries_newGene_26586;gene-CASP3;gene-PIK3CG	K02256+K02187+K21289
Spliceosome	ko03040	1	158	107	8364	Ovis_aries_newGene_25585	K12886
Dopaminergic synapse	ko04728	2	129	107	8364	gene-CACNA1A;gene-PLCB4	K04344+K05858
Tyrosine metabolism	ko00350	1	42	107	8364	gene-LOC101112335	K00276
Glycine, serine and threonine metabolism	ko00260	1	48	107	8364	gene-LOC101112335	K00276
Synaptic vesicle cycle	ko04721	1	62	107	8364	gene-CACNA1A	K04344
Toll-like receptor signaling pathway	ko04620	2	121	107	8364	gene-PIK3CG;gene-TLR4	K21289+K10160
Dilated cardiomyopathy	ko05414	4	93	107	8364	gene-ADCY7;gene-CACNG7;gene-IGF1;gene-ITGA9	K08047+K04872+K05459+K06585
Melanogenesis	ko04916	6	108	107	8364	gene-ADCY7;gene-FZD6;gene-FZD7;gene-KIT;gene-PLCB4;gene-TCF7L1	K08047+K02376+K02432+K05091+K05858+K04490
Neuroactive ligand-receptor interaction	ko04080	7	308	107	8364	gene-ADCYAP1R1;gene-CALCR;gene-CNR1;gene-GHSR;gene-PTGER4;gene-S1PR3;gene-TBXA2R	K04587+K04576+K04277+K04284+K04261+K04290+K04264
Renal cell carcinoma	ko05211	1	70	107	8364	gene-PIK3CG	K21289
Natural killer cell mediated cytotoxicity	ko04650	4	159	107	8364	gene-CASP3;gene-LOC114108725;gene-PIK3CG;gene-TNFSF10	K02187+K07986+K21289+K04721
Taste transduction	ko04742	1	118	107	8364	gene-CACNA1A	K04344
Acute myeloid leukemia	ko05221	4	59	107	8364	gene-JUP;gene-KIT;gene-PIK3CG;gene-TCF7L1	K10056+K05091+K21289+K04490
Notch signaling pathway	ko04330	2	52	107	8364	gene-LOC101115315;gene-LOC114108784	K06061+K06058
Amoebiasis	ko05146	8	113	107	8364	gene-CASP3;gene-COL1A2;gene-LAMA4;gene-LAMB1;gene-NOS2;gene-PIK3CG;gene-PLCB4;gene-TLR4	K02187+K06236+K06241+K05636+K13241+K21289+K05858+K10160
Estrogen signaling pathway	ko04915	4	102	107	8364	gene-ADCY7;gene-PIK3CG;gene-PLCB4;gene-SP1	K08047+K21289+K05858+K04684
Cholinergic synapse	ko04725	5	114	107	8364	gene-ADCY7;gene-CACNA1A;gene-KCNJ2;gene-PIK3CG;gene-PLCB4	K08047+K04344+K04996+K21289+K05858
Colorectal cancer	ko05210	3	71	107	8364	gene-CASP3;gene-PIK3CG;gene-TCF7L1	K02187+K21289+K04490
Mucin type O-Glycan biosynthesis	ko00512	1	35	107	8364	gene-GALNT18	K00710
Measles	ko05162	3	162	107	8364	gene-PIK3CG;gene-TLR4;gene-TNFSF10	K21289+K10160+K04721
Basal cell carcinoma	ko05217	3	61	107	8364	gene-FZD6;gene-FZD7;gene-TCF7L1	K02376+K02432+K04490
Prostate cancer	ko05215	3	91	107	8364	gene-IGF1;gene-PIK3CG;gene-TCF7L1	K05459+K21289+K04490
Inositol phosphate metabolism	ko00562	2	74	107	8364	gene-PIK3CG;gene-PLCB4	K21289+K05858
Glioma	ko05214	2	65	107	8364	gene-IGF1;gene-PIK3CG	K05459+K21289
Choline metabolism in cancer	ko05231	2	106	107	8364	gene-PIK3CG;gene-SP1	K21289+K04684
Rap1 signaling pathway	ko04015	9	222	107	8364	gene-ADCY7;gene-CNR1;gene-DOCK4;gene-FLT4;gene-IGF1;gene-KIT;gene-MAGI1;gene-PIK3CG;gene-PLCB4	K08047+K04277+K17697+K05097+K05459+K05091+K05631+K21289+K05858
Pantothenate and CoA biosynthesis	ko00770	1	19	107	8364	gene-DPYD	K00207
Legionellosis	ko05134	2	80	107	8364	gene-CASP3;gene-TLR4	K02187+K10160
Purine metabolism	ko00230	4	189	107	8364	gene-ADCY7;gene-AK4;gene-LOC101108212;gene-PDE9A	K08047+K00939+K12320+K13761
Ribosome	ko03010	1	266	107	8364	gene-LOC105601845	K02866
Progesterone-mediated oocyte maturation	ko04914	3	92	107	8364	gene-ADCY7;gene-IGF1;gene-PIK3CG	K08047+K05459+K21289
Longevity regulating pathway - multiple species	ko04213	3	67	107	8364	gene-ADCY7;gene-IGF1;gene-PIK3CG	K08047+K05459+K21289
Glucagon signaling pathway	ko04922	1	97	107	8364	gene-PLCB4	K05858
Bacterial invasion of epithelial cells	ko05100	2	87	107	8364	gene-HCLS1;gene-PIK3CG	K06106+K21289
Platelet activation	ko04611	5	124	107	8364	gene-ADCY7;gene-COL1A2;gene-PIK3CG;gene-PLCB4;gene-TBXA2R	K08047+K06236+K21289+K05858+K04264
Morphine addiction	ko05032	2	97	107	8364	gene-ADCY7;gene-CACNA1A	K08047+K04344
Apoptosis	ko04210	3	153	107	8364	gene-CASP3;gene-PIK3CG;gene-TNFSF10	K02187+K21289+K04721
Ubiquitin mediated proteolysis	ko04120	1	151	107	8364	gene-LOC114117002	K10585
Fc gamma R-mediated phagocytosis	ko04666	4	99	107	8364	gene-MARCKS;gene-MARCKSL1;gene-MYO10;gene-PIK3CG	K12561+K13536+K12559+K21289
Leukocyte transendothelial migration	ko04670	2	126	107	8364	gene-CDH5;gene-PIK3CG	K06533+K21289
Oxytocin signaling pathway	ko04921	5	160	107	8364	gene-ADCY7;gene-CACNG7;gene-KCNJ2;gene-PIK3CG;gene-PLCB4	K08047+K04872+K04996+K21289+K05858
Endometrial cancer	ko05213	2	53	107	8364	gene-PIK3CG;gene-TCF7L1	K21289+K04490
Peroxisome	ko04146	1	87	107	8364	gene-NOS2	K13241
Phosphatidylinositol signaling system	ko04070	2	105	107	8364	gene-PIK3CG;gene-PLCB4	K21289+K05858
Vascular smooth muscle contraction	ko04270	3	128	107	8364	gene-ADCY7;gene-KCNMB1;gene-PLCB4	K08047+K04937+K05858
ABC transporters	ko02010	1	70	107	8364	gene-ABCB1	K05658
Rheumatoid arthritis	ko05323	1	106	107	8364	gene-TLR4	K10160
Focal adhesion	ko04510	8	213	107	8364	gene-COL1A2;gene-FLT4;gene-IGF1;gene-ITGA9;gene-LAMA4;gene-LAMB1;gene-PIK3CG;gene-RELN	K06236+K05097+K05459+K06585+K06241+K05636+K21289+K06249
Protein digestion and absorption	ko04974	2	122	107	8364	gene-COL14A1;gene-COL1A2	K08133+K06236
Pyrimidine metabolism	ko00240	1	105	107	8364	gene-DPYD	K00207
Serotonergic synapse	ko04726	3	119	107	8364	gene-CACNA1A;gene-CASP3;gene-PLCB4	K04344+K02187+K05858
Inflammatory mediator regulation of TRP channels	ko04750	5	104	107	8364	gene-ADCY7;gene-IGF1;gene-PIK3CG;gene-PLCB4;gene-PTGER4	K08047+K05459+K21289+K05858+K04261
Endocrine and other factor-regulated calcium reabsorption	ko04961	1	43	107	8364	gene-PLCB4	K05858
Wnt signaling pathway	ko04310	6	160	107	8364	gene-FZD6;gene-FZD7;gene-PLCB4;gene-SERPINF1;gene-SFRP4;gene-TCF7L1	K02376+K02432+K05858+K19614+K02185+K04490
Pancreatic secretion	ko04972	2	105	107	8364	gene-ADCY7;gene-PLCB4	K08047+K05858
Lysosome	ko04142	1	133	107	8364	gene-LOC114112267	K06546
RNA transport	ko03013	1	185	107	8364	gene-THOC6	K13175
Nicotine addiction	ko05033	1	40	107	8364	gene-CACNA1A	K04344
SNARE interactions in vesicular transport	ko04130	1	35	107	8364	gene-STX11	K08487
Neurotrophin signaling pathway	ko04722	1	126	107	8364	gene-PIK3CG	K21289
mTOR signaling pathway	ko04150	4	165	107	8364	gene-FZD6;gene-FZD7;gene-IGF1;gene-PIK3CG	K02376+K02432+K05459+K21289
Long-term depression	ko04730	3	61	107	8364	gene-CACNA1A;gene-IGF1;gene-PLCB4	K04344+K05459+K05858
Systemic lupus erythematosus	ko05322	5	168	107	8364	gene-C1R;gene-C1S;gene-C7;gene-LOC101111669;gene-LOC101112891	K01330+K01331+K03996+K11251+K03989
Viral myocarditis	ko05416	1	89	107	8364	gene-CASP3	K02187
Type II diabetes mellitus	ko04930	2	50	107	8364	gene-CACNA1A;gene-PIK3CG	K04344+K21289
ECM-receptor interaction	ko04512	7	88	107	8364	gene-CD44;gene-COL1A2;gene-ITGA9;gene-LAMA4;gene-LAMB1;gene-RELN;gene-SDC1	K06256+K06236+K06585+K06241+K05636+K06249+K06257
Glycosaminoglycan biosynthesis - keratan sulfate	ko00533	2	15	107	8364	gene-CHST1;gene-CHST2	K01022+K04745
Parkinson's disease	ko05012	2	157	107	8364	Ovis_aries_newGene_26586;gene-CASP3	K02256+K02187
Cysteine and methionine metabolism	ko00270	1	45	107	8364	gene-AHCYL2	K01251
Circadian rhythm	ko04710	3	32	107	8364	gene-BHLHE40;gene-NPAS2;gene-NR1D1	K03729+K09026+K03728
Cardiac muscle contraction	ko04260	2	79	107	8364	Ovis_aries_newGene_26586;gene-CACNG7	K02256+K04872
Osteoclast differentiation	ko04380	2	140	107	8364	gene-CALCR;gene-PIK3CG	K04576+K21289
Ovarian steroidogenesis	ko04913	2	59	107	8364	gene-ADCY7;gene-IGF1	K08047+K05459
Staphylococcus aureus infection	ko05150	4	66	107	8364	gene-C1R;gene-C1S;gene-LOC101112891;gene-LOC106990096	K01330+K01331+K03989+K04004
Carbohydrate digestion and absorption	ko04973	1	45	107	8364	gene-PIK3CG	K21289
Bile secretion	ko04976	2	94	107	8364	gene-ABCB1;gene-ADCY7	K05658+K08047
AMPK signaling pathway	ko04152	2	125	107	8364	gene-IGF1;gene-PIK3CG	K05459+K21289
Tuberculosis	ko05152	4	223	107	8364	gene-CASP3;gene-MRC1;gene-NOS2;gene-TLR4	K02187+K06560+K13241+K10160
Insulin secretion	ko04911	4	84	107	8364	gene-ADCY7;gene-ADCYAP1R1;gene-KCNMB1;gene-PLCB4	K08047+K04587+K04937+K05858
GnRH signaling pathway	ko04912	3	91	107	8364	gene-ADCY7;gene-MMP14;gene-PLCB4	K08047+K07763+K05858
Arginine and proline metabolism	ko00330	1	53	107	8364	gene-NOS2	K13241
Amyotrophic lateral sclerosis (ALS)	ko05014	1	58	107	8364	gene-CASP3	K02187
Inflammatory bowel disease (IBD)	ko05321	1	77	107	8364	gene-TLR4	K10160
Hippo signaling pathway	ko04390	4	159	107	8364	gene-DLG2;gene-FZD6;gene-FZD7;gene-TCF7L1	K12075+K02376+K02432+K04490
African trypanosomiasis	ko05143	2	44	107	8364	gene-LAMA4;gene-PLCB4	K06241+K05858
Thyroid hormone signaling pathway	ko04919	2	119	107	8364	gene-PIK3CG;gene-PLCB4	K21289+K05858
HIF-1 signaling pathway	ko04066	4	103	107	8364	gene-IGF1;gene-NOS2;gene-PIK3CG;gene-TLR4	K05459+K13241+K21289+K10160
B cell receptor signaling pathway	ko04662	1	81	107	8364	gene-PIK3CG	K21289
EGFR tyrosine kinase inhibitor resistance	ko01521	2	88	107	8364	gene-IGF1;gene-PIK3CG	K05459+K21289
PI3K-Akt signaling pathway	ko04151	10	389	107	8364	gene-COL1A2;gene-FLT4;gene-IGF1;gene-ITGA9;gene-KIT;gene-LAMA4;gene-LAMB1;gene-PIK3CG;gene-RELN;gene-TLR4	K06236+K05097+K05459+K06585+K05091+K06241+K05636+K21289+K06249+K10160
cGMP-PKG signaling pathway	ko04022	4	173	107	8364	gene-ADCY7;gene-KCNMB1;gene-PIK3CG;gene-PLCB4	K08047+K04937+K21289+K05858
Drug metabolism - other enzymes	ko00983	1	46	107	8364	gene-DPYD	K00207
Influenza A	ko05164	3	208	107	8364	gene-PIK3CG;gene-TLR4;gene-TNFSF10	K21289+K10160+K04721
Salmonella infection	ko05132	2	88	107	8364	gene-NOS2;gene-TLR4	K13241+K10160
Complement and coagulation cascades	ko04610	7	87	107	8364	gene-C1R;gene-C1S;gene-C7;gene-LOC101112891;gene-LOC106990096;gene-PLAU;gene-SERPING1	K01330+K01331+K03996+K03989+K04004+K01348+K04001
Endocytosis	ko04144	1	286	107	8364	gene-KIT	K05091
HTLV-I infection	ko05166	5	294	107	8364	gene-ADCY7;gene-FZD6;gene-FZD7;gene-PIK3CG;gene-TP53INP1	K08047+K02376+K02432+K21289+K15310
Adherens junction	ko04520	1	77	107	8364	gene-TCF7L1	K04490
Phagosome	ko04145	4	192	107	8364	gene-C1R;gene-COLEC12;gene-MRC1;gene-TLR4	K01330+K10062+K06560+K10160
Tight junction	ko04530	4	141	107	8364	gene-HCLS1;gene-LOC101113252;gene-MAGI1;gene-MYH7B	K06106+K10352+K05631+K10352
Oxidative phosphorylation	ko00190	1	149	107	8364	Ovis_aries_newGene_26586	K02256
Sphingolipid metabolism	ko00600	1	53	107	8364	gene-LOC101110257	K00654
MicroRNAs in cancer	ko05206	7	159	107	8364	Ovis_aries_newGene_25585;gene-ABCB1;gene-CASP3;gene-CD44;gene-MARCKS;gene-PLAU;gene-STMN1	K12886+K05658+K02187+K06256+K12561+K01348+K04381
Transcriptional misregulation in cancer	ko05202	4	180	107	8364	gene-IGF1;gene-JUP;gene-PLAU;gene-SP1	K05459+K10056+K01348+K04684
Insulin resistance	ko04931	2	112	107	8364	gene-PIK3CG;gene-PPP1R3C	K21289+K07189
Calcium signaling pathway	ko04020	5	201	107	8364	gene-ADCY7;gene-CACNA1A;gene-NOS2;gene-PLCB4;gene-TBXA2R	K08047+K04344+K13241+K05858+K04264
Sphingolipid signaling pathway	ko04071	4	126	107	8364	gene-LOC101110257;gene-PIK3CG;gene-PLCB4;gene-S1PR3	K00654+K21289+K05858+K04290
cAMP signaling pathway	ko04024	4	220	107	8364	gene-ADCY7;gene-ADCYAP1R1;gene-GHSR;gene-PIK3CG	K08047+K04587+K04284+K21289
GABAergic synapse	ko04727	2	89	107	8364	gene-ADCY7;gene-CACNA1A	K08047+K04344
Phospholipase D signaling pathway	ko04072	4	154	107	8364	gene-ADCY7;gene-KIT;gene-PIK3CG;gene-PLCB4	K08047+K05091+K21289+K05858
Central carbon metabolism in cancer	ko05230	2	65	107	8364	gene-KIT;gene-PIK3CG	K05091+K21289
Prion diseases	ko05020	2	30	107	8364	gene-C7;gene-NCAM1	K03996+K06491
Regulation of actin cytoskeleton	ko04810	3	229	107	8364	gene-ITGA9;gene-LOC114114600;gene-PIK3CG	K06585+K05764+K21289
Proteoglycans in cancer	ko05205	11	218	107	8364	gene-CASP3;gene-CD44;gene-FZD6;gene-FZD7;gene-HCLS1;gene-IGF1;gene-LUM;gene-PIK3CG;gene-PLAU;gene-SDC1;gene-TLR4	K02187+K06256+K02376+K02432+K06106+K05459+K08122+K21289+K01348+K06257+K10160
AGE-RAGE signaling pathway in diabetic complications	ko04933	4	107	107	8364	gene-CASP3;gene-COL1A2;gene-PIK3CG;gene-PLCB4	K02187+K06236+K21289+K05858
Glutamatergic synapse	ko04724	3	112	107	8364	gene-ADCY7;gene-CACNA1A;gene-PLCB4	K08047+K04344+K05858
Apoptosis - multiple species	ko04215	2	41	107	8364	gene-BOK;gene-CASP3	K02561+K02187
Hematopoietic cell lineage	ko04640	2	102	107	8364	gene-CD44;gene-KIT	K06256+K05091
Hypertrophic cardiomyopathy (HCM)	ko05410	3	81	107	8364	gene-CACNG7;gene-IGF1;gene-ITGA9	K04872+K05459+K06585
Pertussis	ko05133	7	79	107	8364	gene-C1R;gene-C1S;gene-CASP3;gene-LOC101112891;gene-NOS2;gene-SERPING1;gene-TLR4	K01330+K01331+K02187+K03989+K13241+K04001+K10160
Arrhythmogenic right ventricular cardiomyopathy (ARVC)	ko05412	4	73	107	8364	gene-CACNG7;gene-ITGA9;gene-JUP;gene-TCF7L1	K04872+K06585+K10056+K04490
Aldosterone-regulated sodium reabsorption	ko04960	2	41	107	8364	gene-IGF1;gene-PIK3CG	K05459+K21289
Renin secretion	ko04924	4	66	107	8364	gene-ADCYAP1R1;gene-KCNJ2;gene-PLCB4;gene-PTGER4	K04587+K04996+K05858+K04261
Small cell lung cancer	ko05222	4	99	107	8364	gene-LAMA4;gene-LAMB1;gene-NOS2;gene-PIK3CG	K06241+K05636+K13241+K21289
Toxoplasmosis	ko05145	6	143	107	8364	gene-CASP3;gene-LAMA4;gene-LAMB1;gene-NOS2;gene-PIK3CG;gene-TLR4	K02187+K06241+K05636+K13241+K21289+K10160
Pancreatic cancer	ko05212	1	68	107	8364	gene-PIK3CG	K21289
Prolactin signaling pathway	ko04917	2	92	107	8364	gene-CISH;gene-PIK3CG	K04701+K21289
Non-small cell lung cancer	ko05223	1	56	107	8364	gene-PIK3CG	K21289
Gastric acid secretion	ko04971	3	74	107	8364	gene-ADCY7;gene-KCNJ2;gene-PLCB4	K08047+K04996+K05858
p53 signaling pathway	ko04115	2	80	107	8364	gene-CASP3;gene-IGF1	K02187+K05459
TNF signaling pathway	ko04668	3	115	107	8364	gene-CASP3;gene-MMP14;gene-PIK3CG	K02187+K07763+K21289
Salivary secretion	ko04970	2	98	107	8364	gene-ADCY7;gene-PLCB4	K08047+K05858
Ras signaling pathway	ko04014	6	243	107	8364	gene-FLT4;gene-IGF1;gene-KIT;gene-PIK3CG;gene-PLA1A;gene-RASAL2	K05097+K05459+K05091+K21289+K13618+K17633
Melanoma	ko05218	2	74	107	8364	gene-IGF1;gene-PIK3CG	K05459+K21289
Gap junction	ko04540	2	91	107	8364	gene-ADCY7;gene-PLCB4	K08047+K05858
Alzheimer's disease	ko05010	3	182	107	8364	Ovis_aries_newGene_26586;gene-CASP3;gene-PLCB4	K02256+K02187+K05858
Insulin signaling pathway	ko04910	2	149	107	8364	gene-PIK3CG;gene-PPP1R3C	K21289+K07189
FoxO signaling pathway	ko04068	4	143	107	8364	gene-FOXO6;gene-IGF1;gene-PIK3CG;gene-TNFSF10	K17847+K05459+K21289+K04721
Epstein-Barr virus infection	ko05169	2	215	107	8364	gene-CD44;gene-PIK3CG	K06256+K21289
Jak-STAT signaling pathway	ko04630	2	225	107	8364	gene-CISH;gene-PIK3CG	K04701+K21289
Thyroid cancer	ko05216	1	32	107	8364	gene-TCF7L1	K04490
T cell receptor signaling pathway	ko04660	1	114	107	8364	gene-PIK3CG	K21289
VEGF signaling pathway	ko04370	1	62	107	8364	gene-PIK3CG	K21289
Leishmaniasis	ko05140	3	85	107	8364	gene-MARCKSL1;gene-NOS2;gene-TLR4	K13536+K13241+K10160
Regulation of lipolysis in adipocytes	ko04923	2	59	107	8364	gene-ADCY7;gene-PIK3CG	K08047+K21289
Signaling pathways regulating pluripotency of stem cells	ko04550	4	149	107	8364	gene-FZD6;gene-FZD7;gene-IGF1;gene-PIK3CG	K02376+K02432+K05459+K21289
Ether lipid metabolism	ko00565	1	51	107	8364	gene-ENPP2	K01122
Thyroid hormone synthesis	ko04918	2	70	107	8364	gene-ADCY7;gene-PLCB4	K08047+K05858
Viral carcinogenesis	ko05203	3	246	107	8364	Ovis_aries_newGene_25585;gene-CASP3;gene-PIK3CG	K12886+K02187+K21289
Platinum drug resistance	ko01524	2	92	107	8364	gene-CASP3;gene-PIK3CG	K02187+K21289
Chronic myeloid leukemia	ko05220	2	78	107	8364	gene-MECOM;gene-PIK3CG	K04462+K21289
Malaria	ko05144	2	55	107	8364	gene-SDC1;gene-TLR4	K06257+K10160
Huntington's disease	ko05016	4	214	107	8364	Ovis_aries_newGene_26586;gene-CASP3;gene-PLCB4;gene-SP1	K02256+K02187+K05858+K04684
Retrograde endocannabinoid signaling	ko04723	4	103	107	8364	gene-ADCY7;gene-CACNA1A;gene-CNR1;gene-PLCB4	K08047+K04344+K04277+K05858
ErbB signaling pathway	ko04012	1	93	107	8364	gene-PIK3CG	K21289
Herpes simplex infection	ko05168	2	232	107	8364	Ovis_aries_newGene_25585;gene-CASP3	K12886+K02187
Circadian entrainment	ko04713	3	99	107	8364	gene-ADCY7;gene-ADCYAP1R1;gene-PLCB4	K08047+K04587+K05858
Longevity regulating pathway	ko04211	3	95	107	8364	gene-ADCY7;gene-IGF1;gene-PIK3CG	K08047+K05459+K21289
Fc epsilon RI signaling pathway	ko04664	1	74	107	8364	gene-PIK3CG	K21289
MAPK signaling pathway	ko04010	5	265	107	8364	gene-CACNA1A;gene-CACNG7;gene-CASP3;gene-MECOM;gene-STMN1	K04344+K04872+K02187+K04462+K04381
Cytokine-cytokine receptor interaction	ko04060	5	288	107	8364	gene-CCL21;gene-FLT4;gene-KIT;gene-LOC101119572;gene-TNFSF10	K16062+K05097+K05091+K16596+K04721
Aldosterone synthesis and secretion	ko04925	2	78	107	8364	gene-ADCY7;gene-PLCB4	K08047+K05858
Cell adhesion molecules (CAMs)	ko04514	6	176	107	8364	Ovis_aries_newGene_27940;gene-CDH4;gene-CDH5;gene-ITGA9;gene-NCAM1;gene-SDC1	K06797+K06797+K06533+K06585+K06491+K06257
Endocrine resistance	ko01522	4	99	107	8364	gene-ADCY7;gene-IGF1;gene-PIK3CG;gene-SP1	K08047+K05459+K21289+K04684
Pathways in cancer	ko05200	15	427	107	8364	gene-ADCY7;gene-CASP3;gene-FZD6;gene-FZD7;gene-IGF1;gene-JUP;gene-KIT;gene-LAMA4;gene-LAMB1;gene-MECOM;gene-NOS2;gene-PIK3CG;gene-PLCB4;gene-PTGER4;gene-TCF7L1	K08047+K02187+K02376+K02432+K05459+K10056+K05091+K06241+K05636+K04462+K13241+K21289+K05858+K04261+K04490
Hepatitis C	ko05160	1	148	107	8364	gene-PIK3CG	K21289
Chemokine signaling pathway	ko04062	5	189	107	8364	gene-ADCY7;gene-CCL21;gene-LOC101119572;gene-PIK3CG;gene-PLCB4	K08047+K16062+K16596+K21289+K05858
Hepatitis B	ko05161	3	168	107	8364	gene-CASP3;gene-PIK3CG;gene-TLR4	K02187+K21289+K10160
