# Supplementary material for: Transcriptomics analysis reveals the effect of Broussonetia papyrifera L. fermented feed on meat quality traits in fattening lamb
Source: PeerJ. 2021 Apr 27;9:e11295. doi: 10.7717/peerj.11295 (PMC8086582; doi:10.7717/peerj.11295)
Supplement: Supplemental Information 8 [file peerj-09-11295-s008.xlsx]

## Sheet: Sheet1
gene	β-actin	β-actin	β-actin	ECI1	ECI1	ECI1	FABP3	FABP3	FABP3	GOT1	GOT1	GOT1	LPIN1	LPIN1	LPIN1	MLYCD	MLYCD	MLYCD	PLIN5	PLIN5	PLIN5	RASD1	RASD1	RASD1	SELENOW	SELENOW	SELENOW	ACADVL	ACADVL	ACADVL
0	25.01	25.04	25.01	30.21	30.89	30.52	28.46	28.12	28.73	30.29	29.98	30.06	30.19	30.22	30.38	30.01	29.15	29.28	31.18	30.76	31.36	31.38	32.3	32.41	28.5	28.28	29.2	32.1	32.52	32.91
0	25.27	25.71	25.58	30.44	30.07	30.44	28.52	28.35	29.8	30.33	30.78	31.48	30.77	30.46	30.55	29.89	28.4	29.94	31.32	30.82	30.24	31.88	32.38	32.54	28.95	29.24	29.29	31.23	30.83	31.19
0	25.01	25.32	24.81	29.2	28.07	28.23	28.59	28.76	28.57	30.92	31.66	31.56	31.79	30.13	30.17	29.05	28.26	29.03	30.99	30.83	30.13	31.88	33.17	32.02	28.25	28.44	28.32	31.43	31.27	30.92
0.06	24.77	24.48	24.82	25.65	25.45	25.83	27.16	27.28	27.55	22.82	22.84	22.79	25.24	25.38	25.39	27.07	26.87	27.31	28.74	29.3	28.39	31.27	30.38	30.33	29.73	29.46	30.15	27.62	27.21	28.33
0.06	23.69	23.75	23.85	24.99	25.1	24.77	27.7	27.75	27.22	23.71	23.6	23.71	24.85	24.88	24.98	26.18	26.75	26.24	30.27	29.71	29.72	30.15	29.46	30.49	30.02	29.71	29.62	27.73	27.3	27.4
0.06	24.75	24.6	24.82	25.49	25.64	24.85	26.85	27.07	26.94	22.03	22.52	22.71	24.83	24.9	25.29	26.46	26.87	26.78	31.45	30.23	30.53	32.02	33.8	30.92	29.45	29.58	30.15	27.71	26.81	26.82
0.18	23.54	23.55	23.46	22.79	22.36	21.2	26.04	25.59	26.02	23.71	23.6	23.71	25.47	25.55	25.71	27.52	27.63	27.37	29.03	29.18	28.59	28.91	28.84	28.7	29.96	30.47	30.08	28	28.2	28.99
0.18	23.15	23.34	23.32	23.86	23.48	23.87	25.65	26.42	25.25	25.07	25.13	25.12	25.34	25.19	25.23	28.75	28.26	29.03	28.54	28.4	28	30.59	29.9	30.93	31.25	30.91	30.84	28.19	28.04	27.87
0.18	22.9	23.23	23.46	24.55	24.33	24.29	26.31	26.39	25.72	26.73	26.9	26.78	25.17	25.75	25.71	26.99	26.72	27.36	28.83	28.82	28.73	29.33	28.78	29.48	30.58	30.78	31.48	27.23	28.3	27.42
1	23.42	23.51	23.62	25.44	26.63	25.4	26.9	26.88	26.42	26.83	26.68	26.87	28.66	28.92	28.92	27.38	27.43	27.87	29.83	29.82	29.27	28.59	28.9	28.93	32.82	32.33	32.46	29.48	29.47	28.05
1	23.39	23.5	23.4	25.61	25.51	25.67	26.92	26.9	26.64	27.28	27.09	27.06	28.91	28.88	29.29	27.72	27.65	27.69	28.89	29.08	29.09	29.23	29.47	29.82	31.47	31.03	31	29.42	29.57	28
1	23.11	23.23	23.34	26.41	26.9	26.75	26.2	27.24	27.18	27.76	27.65	27.62	27.38	27.39	27.34	27.72	27.83	28.66	29.53	28.74	29.39	28.84	28.7	29.78	30.45	31.19	31.22	29.47	29.3	29.35
